# Supplementary material for: A bifunctional squaramide-catalysed enantioselective vinylogous Michael addition/cyclization cascade reaction of 4-unsaturated isoxazol-5-ones and α,α-dicyanoalkenes
Source: Royal Society of Chemistry journal article supplement (doi:10.1039/d1ob01256h), 2021-01-01
Supplement: d1ob01256h1.pdf [file d1ob01256h1.pdf]

# **Bifunctional squaramide-catalysed enantioselective vinylogous Michael addition/cyclization cascade reaction of 4-unsaturated isoxazol-5-ones and $\alpha,\alpha$ -dicyanoalkenes**

Yu Wang, Cheng Niu, Dong-Hua Xie and Da-Ming Du\*

*Key Laboratory of Medical Molecule Science & Pharmaceutics Engineering, Ministry of  
Industry and Information Technology, School of Chemistry and Chemical Engineering,  
Beijing Institute of Technology, 5 South Zhongguancun Street, Beijing 100081, People's  
Republic of China*

E-mail: [dudm@bit.edu.cn](mailto:dudm@bit.edu.cn)

## *Supporting Information*

### **Contents**

|                                                                                                   |     |
|---------------------------------------------------------------------------------------------------|-----|
| 1. General information.....                                                                       | S1  |
| 2. Materials.....                                                                                 | S1  |
| 3. General procedure for the synthesis of racemates of <b>3</b> .....                             | S1  |
| 4. General procedure of the synthesis of chiral compounds <b>3</b> .....                          | S1  |
| 5. Scale-up synthesis of <b>3aa</b> .....                                                         | S17 |
| 6. Procedure and the characterization data of compound <b>4</b> .....                             | S18 |
| 7. References.....                                                                                | S18 |
| 8. Copies of $^1\text{H}$ , $^{13}\text{C}$ and $^{19}\text{F}$ NMR spectra of new compounds..... | S20 |
| 9. Copies of HPLC chromatograms.....                                                              | S79 |

## 1. General information

Commercially available compounds were used without further purification. Solvents were dried according to standard procedures. Column chromatography was performed with silica gel (200–300 mesh). Melting points were determined with an XT-4 melting-point apparatus and are uncorrected. <sup>1</sup>H NMR spectra were measured with a Bruker Ascend 400 MHz spectrometer, chemical shifts were reported in  $\delta$  (ppm) units relative to tetramethylsilane (TMS) as an internal standard. <sup>13</sup>C NMR spectra were measured at 100 MHz with a 400 MHz spectrometer, chemical shifts are reported in ppm relative to tetramethylsilane and referenced to solvent peak (CDCl<sub>3</sub>,  $\delta$  C = 77.00). High resolution mass spectra (Electron spray ionization) were measured with an Agilent 6520 Accurate-Mass Q-TOF MS system equipped with an electrospray ionization (ESI) source. Optical rotations were measured with a Krüss P8000 polarimeter at the indicated concentration with the units of g/100 mL. Enantiomeric excesses were determined by chiral HPLC analysis using an Agilent 1200 LC instrument with a Daicel Chiralpak IA or IC column.

## 2. Materials

The various unsaturated isoxazolones **1** were prepared according to the reported literature procedure.<sup>[1]</sup> The  $\alpha,\alpha$ -dicyanoalkylidenes **2** were prepared according to the literature.<sup>[2]</sup> Chiral squaramide catalysts and chiral thiourea catalyst were prepared according to the reported procedures.<sup>[3]</sup>

## 3. General procedure for the synthesis of the racemates of **3**

To a dried small bottle were added **1** (0.10 mmol), Et<sub>3</sub>N (1.1 mg, 0.01 mmol) and CHCl<sub>3</sub> (1.0 mL). The mixture was stirred at room temperature for 5 min, and **2** (0.12 mmol) was then added. After no **1** was monitored by TLC anymore, the reaction mixture was concentrated and directly purified by silica gel column chromatography (petroleum ether/ethyl acetate 5:1 v/v) to afford the racemates of **3**.

## 4. General procedure for the synthesis of chiral compounds **3**

To a dried small bottle were added **1** (0.10 mmol), chiral organocatalyst **C6** (0.6 mg, 0.001 mmol, 1 mol%) and CHCl<sub>3</sub> (1.0 mL). The mixture was stirred at room temperature for 5 min,

and **2** (0.12 mmol) was then added. After no **1** was monitored by TLC anymore, the reaction mixture was concentrated and directly purified by silica gel column chromatography (petroleum ether/ethyl acetate 5:1 v/v) to afford the desired products **3**.

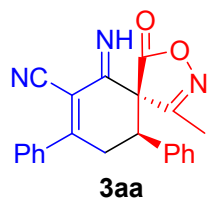

**(5S,10R)-6-Imino-4-methyl-1-oxo-8,10-diphenyl-2-oxa-3-azaspiro[4.5]deca-3,7-diene-7-carbonitrile (3aa)**. Employing the general procedure and purified by silica gel (200-300 mesh) column chromatography using petroleum ether/ethyl acetate (5:1 v/v) as eluent to obtain **3aa** as a white solid (25.6 mg, 72% yield), m. p. 83–85 °C. HPLC (Daicel Chiralpak IC, *n*-hexane/isopropanol = 60:40, flow rate 1.0 mL/min, detection at 254 nm): major diastereomer:  $t_R$  = 11.4 min (minor enantiomer),  $t_R$  = 18.0 min (major enantiomer); 90% *ee*.  $[\alpha]_D^{25}$  =  $-79.3$  ( $c$  = 1.75,  $\text{CH}_2\text{Cl}_2$ ).  $^1\text{H}$  NMR (400 MHz,  $\text{CDCl}_3$ ):  $\delta$  10.41 (s, 1H, NH), 7.61–7.59 (m, 2H, ArH), 7.54–7.46 (m, 3H, ArH), 7.37–7.35 (m, 3H, ArH), 7.25–7.23 (m, 2H, ArH), 3.88 (dd,  $J_1$  = 19.6 Hz,  $J_2$  = 11.6 Hz, 1H,  $\text{CH}_2$ ), 3.65 (dd,  $J_1$  = 12.0 Hz,  $J_2$  = 4.4 Hz, 1H, CH), 3.04 (dd,  $J_1$  = 19.6 Hz,  $J_2$  = 4.4 Hz, 1H,  $\text{CH}_2$ ), 2.09 (s, 3H,  $\text{CH}_3$ ) ppm;  $^{13}\text{C}$  NMR (100 MHz,  $\text{CDCl}_3$ ):  $\delta$  174.7, 166.2, 165.6, 162.1, 136.5, 135.7, 131.5, 129.6, 129.2, 129.0, 127.4, 127.1, 114.1, 108.0, 61.2, 44.0, 34.3, 12.7 ppm. HRMS (ESI):  $m/z$  calcd. for  $\text{C}_{22}\text{H}_{18}\text{N}_3\text{O}_2$  [ $\text{M} + \text{H}$ ] $^+$  356.1394, found 356.1386.

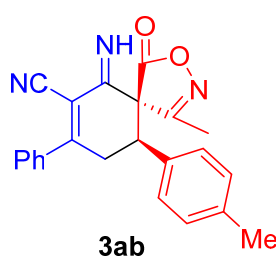

**(5S,10R)-6-Imino-4-methyl-1-oxo-8-phenyl-10-(*p*-tolyl)-2-oxa-3-azaspiro[4.5]deca-3,7-diene-7-carbonitrile (3ab)**. Employing the general procedure and purified by silica gel (200-300 mesh) column chromatography using petroleum ether/ethyl acetate (5:1 v/v) as eluent to obtain **3ab** as a white solid (27.7 mg, 75% yield), m. p. 145–147 °C. HPLC (Daicel Chiralpak IC, *n*-hexane/ethyl acetate = 80:20, flow rate 1.0 mL/min, detection at 254 nm): major diastereomer:  $t_R$  = 9.1 min (minor enantiomer),  $t_R$  = 13.8 min (major enantiomer); 87% *ee*.  $[\alpha]_D^{25}$  =  $-143.6$  ( $c$  = 0.50,  $\text{CH}_2\text{Cl}_2$ ).  $^1\text{H}$  NMR (400 MHz,  $\text{CDCl}_3$ ):  $\delta$  10.40 (s, 1H, NH), 7.60

(dd,  $J = 7.6, 1.6$  Hz, 2H, ArH), 7.54–7.48 (m, 3H, ArH), 7.18–7.14 (m, 4H, ArH), 3.87 (dd,  $J_1 = 19.8$  Hz,  $J_2 = 11.8$  Hz, 1H, CH<sub>2</sub>), 3.60 (dd,  $J_1 = 11.8$  Hz,  $J_2 = 4.2$  Hz, 1H, CH), 3.02 (dd,  $J_1 = 19.6$  Hz,  $J_2 = 4.4$  Hz, 1H, CH<sub>2</sub>), 2.33 (s, 3H, CH<sub>3</sub>), 2.10 (s, 3H, CH<sub>3</sub>) ppm; <sup>13</sup>C NMR (100 MHz, CDCl<sub>3</sub>):  $\delta$  174.7, 166.2, 165.7, 162.2, 139.2, 136.6, 132.6, 131.5, 130.2, 129.0, 127.4, 127.0, 114.1, 108.0, 61.4, 43.7, 34.4, 21.0, 12.7 ppm. HRMS (ESI):  $m/z$  calcd. for C<sub>23</sub>H<sub>20</sub>N<sub>3</sub>O<sub>2</sub> [M + H]<sup>+</sup> 370.1550, found 370.1539.

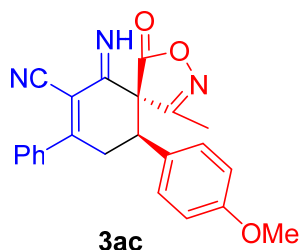

**(5*S*,10*R*)-6-Imino-10-(4-methoxyphenyl)-4-methyl-1-oxo-8-phenyl-2-oxa-3-azaspiro[4.5]deca-3,7-diene-7-carbonitrile (3ac).** Employing the general procedure and purified by silica gel (200-300 mesh) column chromatography using petroleum ether/ethyl acetate (5:1 v/v) as eluent to obtain **3ac** as a white solid (22.3 mg, 78% yield), m. p. 83–85 °C. HPLC (Daicel Chiralpak IC, *n*-hexane/ethyl acetate = 80:20, flow rate 1.0 mL/min, detection at 254 nm): major diastereomer:  $t_R = 11.2$  min (minor enantiomer),  $t_R = 16.8$  min (major enantiomer); 91% *ee*.  $[\alpha]_D^{25} = -61.0$  ( $c = 0.50$ , CH<sub>2</sub>Cl<sub>2</sub>). <sup>1</sup>H NMR (400 MHz, CDCl<sub>3</sub>):  $\delta$  10.43 (s, 1H, NH), 7.62–7.59 (m, 2H, ArH), 7.53–7.47 (m, 3H, ArH), 7.18–7.15 (m, 2H, ArH), 6.89–6.86 (m, 2H, ArH), 3.85 (dd,  $J_1 = 19.6$  Hz,  $J_2 = 11.6$  Hz, 1H, CH<sub>2</sub>), 3.79 (s, 3H, OCH<sub>3</sub>), 3.59 (dd,  $J_1 = 12.0$  Hz,  $J_2 = 4.4$  Hz, 1H, CH), 3.01 (dd,  $J_1 = 19.6$  Hz,  $J_2 = 4.4$  Hz, 1H, CH<sub>2</sub>), 2.11 (s, 3H, CH<sub>3</sub>) ppm; <sup>13</sup>C NMR (100 MHz, CDCl<sub>3</sub>):  $\delta$  174.8, 166.2, 165.7, 162.2, 160.0, 136.6, 131.5, 129.0, 128.3, 127.5, 127.4, 114.9, 114.1, 108.1, 61.5, 55.3, 43.4, 34.6, 12.8 ppm. HRMS (ESI):  $m/z$  calcd. for C<sub>23</sub>H<sub>20</sub>N<sub>3</sub>O<sub>3</sub> [M + H]<sup>+</sup> 386.1499, found 386.1486.

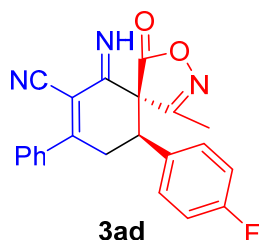

**(5*S*,10*R*)-10-(4-Fluorophenyl)-6-imino-4-methyl-1-oxo-8-phenyl-2-oxa-3-azaspiro[4.5]deca-3,7-diene-7-carbonitrile (3ad).** Employing the general procedure and purified by silica gel (200-300 mesh) column chromatography using petroleum ether/ethyl acetate (5:1 v/v) as

eluent to obtain **3ad** as a white solid (22.4 mg, 60% yield), m. p. 143–145 °C. HPLC (Daicel Chiralpak IC, *n*-hexane/isopropanol = 70:30, flow rate 1.0 mL/min, detection at 254 nm): major diastereomer:  $t_R = 12.2$  min (minor enantiomer),  $t_R = 20.3$  min (major enantiomer); 77% *ee*.  $[\alpha]_D^{25} = -54.0$  ( $c = 0.30$ ,  $\text{CH}_2\text{Cl}_2$ ).  $^1\text{H}$  NMR (400 MHz,  $\text{CDCl}_3$ ):  $\delta$  10.44 (s, 1H, NH), 7.60 (dd,  $J = 7.8, 1.8$  Hz, 2H, ArH), 7.54–7.48 (m, 3H, ArH), 7.26–7.22 (m, 2H, ArH), 7.07 (t,  $J = 8.6$  Hz, 2H, ArH), 3.85 (dd,  $J_1 = 19.6$  Hz,  $J_2 = 12.0$  Hz, 1H,  $\text{CH}_2$ ), 3.64 (dd,  $J_1 = 12.0$  Hz,  $J_2 = 4.4$  Hz, 1H, CH), 3.03 (dd,  $J_1 = 19.6$  Hz,  $J_2 = 4.4$  Hz, 1H,  $\text{CH}_2$ ), 2.11 (s, 3H,  $\text{CH}_3$ ) ppm;  $^{13}\text{C}$  NMR (100 MHz,  $\text{CDCl}_3$ ):  $\delta$  174.6, 166.0, 165.3, 162.9 (d,  $^1J_{\text{C-F}} = 247.8$  Hz), 161.9, 136.4, 131.6, 131.5 (d,  $^4J_{\text{C-F}} = 3.4$  Hz), 129.1, 129.0 (d,  $^3J_{\text{C-F}} = 8.2$  Hz), 127.4, 116.7 (d,  $^2J_{\text{C-F}} = 21.6$  Hz), 114.0, 108.1, 61.3, 43.3, 34.4, 12.7 ppm.  $^{19}\text{F}$  NMR (376 MHz,  $\text{CDCl}_3$ ):  $\delta$  -111.6 ppm. HRMS (ESI):  $m/z$  calcd. for  $\text{C}_{22}\text{H}_{17}\text{FN}_3\text{O}_2$   $[\text{M} + \text{H}]^+$  374.1299, found 374.1293.

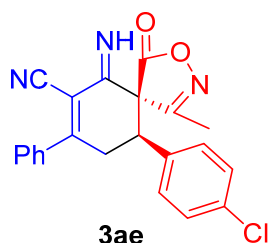

**(5S,10R)-10-(4-Chlorophenyl)-6-imino-4-methyl-1-oxo-8-phenyl-2-oxa-3-azaspiro[4.5]deca-3,7-diene-7-carbonitrile (3ae)**. Employing the general procedure and purified by silica gel (200-300 mesh) column chromatography using petroleum ether/ethyl acetate (5:1 v/v) as eluent to obtain **3ae** as a white solid (29.2 mg, 75% yield), m. p. 120–122 °C. HPLC (Daicel Chiralpak IC, *n*-hexane/ethyl acetate = 85:15, flow rate 1.0 mL/min, detection at 254 nm): major diastereomer:  $t_R = 12.6$  min (minor enantiomer),  $t_R = 22.5$  min (major enantiomer); 77% *ee*.  $[\alpha]_D^{25} = -58.0$  ( $c = 0.25$ ,  $\text{CH}_2\text{Cl}_2$ ).  $^1\text{H}$  NMR (400 MHz,  $\text{CDCl}_3$ ):  $\delta$  10.45 (s, 1H, NH), 7.60 (dd,  $J = 8.0, 1.6$  Hz, 2H, ArH), 7.54–7.48 (m, 3H, ArH), 7.36 (d,  $J = 8.4$  Hz, 2H, ArH), 7.19 (d,  $J = 8.8$  Hz, 2H, ArH), 3.85 (dd,  $J_1 = 19.6$  Hz,  $J_2 = 12.0$  Hz, 1H,  $\text{CH}_2$ ), 3.62 (dd,  $J_1 = 12.0$  Hz,  $J_2 = 4.4$  Hz, 1H, CH), 3.02 (dd,  $J_1 = 19.4$  Hz,  $J_2 = 4.2$  Hz, 1H,  $\text{CH}_2$ ), 2.11 (s, 3H,  $\text{CH}_3$ ) ppm;  $^{13}\text{C}$  NMR (100 MHz,  $\text{CDCl}_3$ ):  $\delta$  174.5, 165.9, 161.8, 136.4, 135.3, 134.1, 131.7, 129.9, 129.1, 128.5, 127.4, 114.0, 108.1, 61.1, 43.4, 34.2, 12.8 ppm. HRMS (ESI):  $m/z$  calcd. for  $\text{C}_{22}\text{H}_{17}\text{ClN}_3\text{O}_2$   $[\text{M} + \text{H}]^+$  390.1004, found 390.1007.

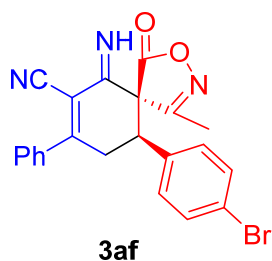

**(5*S*,10*R*)-10-(4-Bromophenyl)-6-imino-4-methyl-1-oxo-8-phenyl-2-oxa-3-azaspiro[4.5]deca-3,7-diene-7-carbonitrile (3af).** Employing the general procedure and purified by silica gel (200-300 mesh) column chromatography using petroleum ether/ethyl acetate (5:1 v/v) as eluent to obtain **3af** as a white solid (32.5 mg, 75% yield), m. p. 140–142 °C. HPLC (Daicel Chiralpak IC, *n*-hexane/ethyl acetate = 85:15, flow rate 1.0 mL/min, detection at 254 nm): major diastereomer:  $t_R$  = 13.1 min (minor enantiomer),  $t_R$  = 23.4 min (major enantiomer); 89% *ee*.  $[\alpha]_D^{25} = -63.4$  ( $c = 0.65$ ,  $\text{CH}_2\text{Cl}_2$ ).  $^1\text{H}$  NMR (400 MHz,  $\text{CDCl}_3$ ):  $\delta$  10.45 (s, 1H, NH), 7.60 (dd,  $J = 7.8, 1.8$  Hz, 2H, ArH), 7.54–7.48 (m, 5H, ArH), 7.14–7.12 (m, 2H, ArH), 3.84 (dd,  $J_1 = 19.6$  Hz,  $J_2 = 12.0$  Hz, 1H,  $\text{CH}_2$ ), 3.61 (dd,  $J_1 = 12.0$  Hz,  $J_2 = 4.4$  Hz, 1H, CH), 3.02 (dd,  $J_1 = 19.2$  Hz,  $J_2 = 4.4$  Hz, 1H,  $\text{CH}_2$ ), 2.10 (s, 3H,  $\text{CH}_3$ ) ppm;  $^{13}\text{C}$  NMR (100 MHz,  $\text{CDCl}_3$ ):  $\delta$  174.5, 165.9, 165.1, 161.8, 136.4, 134.7, 132.8, 131.7, 129.1, 128.8, 127.4, 123.4, 114.0, 108.1, 61.1, 43.5, 34.1, 12.8 ppm. HRMS (ESI):  $m/z$  calcd. for  $\text{C}_{22}\text{H}_{17}^{79}\text{BrN}_3\text{O}_2$  [ $\text{M} + \text{H}$ ] $^+$  434.0499, found 434.0494; calcd. for  $\text{C}_{22}\text{H}_{17}^{81}\text{BrN}_3\text{O}_2$  [ $\text{M} + \text{H}$ ] $^+$  436.0478, found 436.0475.

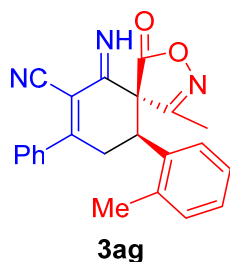

**(5*S*,10*R*)-6-Imino-4-methyl-1-oxo-8-phenyl-10-(*o*-tolyl)-2-oxa-3-azaspiro[4.5]deca-3,7-diene-7-carbonitrile (3ag).** Employing the general procedure and purified by silica gel (200-300 mesh) column chromatography using petroleum ether/ethyl acetate (5:1 v/v) as eluent to obtain **3ag** as a white solid (25.5 mg, 69% yield), m. p. 91–93 °C. HPLC (Daicel Chiralpak IC, *n*-hexane/isopropanol = 65:35, flow rate 1.0 mL/min, detection at 254 nm): major diastereomer:  $t_R$  = 14.4 min (minor enantiomer),  $t_R$  = 27.9 min (major enantiomer); 85% *ee*.  $[\alpha]_D^{25} = -31.5$  ( $c = 1.05$ ,  $\text{CH}_2\text{Cl}_2$ ).  $^1\text{H}$  NMR (400 MHz,  $\text{CDCl}_3$ ):  $\delta$  10.37 (s, 1H, NH), 7.60 (dd,

$J = 8.0, 1.6$  Hz, 2H, ArH), 7.55–7.47 (m, 3H, ArH), 7.22 (s, 4H, ArH), 3.87 (dd,  $J = 11.6$  Hz,  $J_2 = 4.4$  Hz, 1H, CH), 3.69 (dd,  $J_1 = 19.8$  Hz,  $J_2 = 11.8$  Hz, 1H, CH<sub>2</sub>), 2.95 (dd,  $J_1 = 20.0$  Hz,  $J_2 = 4.4$  Hz, 1H, CH<sub>2</sub>), 2.41 (s, 3H, CH<sub>3</sub>), 1.96 (s, 3H, CH<sub>3</sub>) ppm; <sup>13</sup>C NMR (100 MHz, CDCl<sub>3</sub>):  $\delta$  175.1, 166.1, 165.9, 162.8, 136.4, 134.7, 131.6, 129.1, 128.7, 127.8, 127.4, 125.0, 114.2, 107.8, 60.3, 39.1, 35.2, 19.7, 12.5 ppm. HRMS (ESI):  $m/z$  calcd. for C<sub>23</sub>H<sub>20</sub>N<sub>3</sub>O<sub>2</sub> [M + H]<sup>+</sup> 370.1550, found 370.1545.

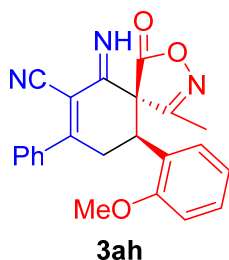

**(5*S*,10*R*)-6-Imino-10-(2-methoxyphenyl)-4-methyl-1-oxo-8-phenyl-2-oxa-3-azaspiro[4.5]deca-3,7-diene-7-carbonitrile (3ah).** Employing the general procedure and purified by silica gel (200-300 mesh) column chromatography using petroleum ether/ethyl acetate (5:1 v/v) as eluent to obtain **3ah** as a white solid (34.6 mg, 90% yield), m. p. 84–86 °C. HPLC (Daicel Chiralpak IC, *n*-hexane/ethyl acetate = 80:20, flow rate 1.0 mL/min, detection at 254 nm): major diastereomer:  $t_R = 10.7$  min (minor enantiomer),  $t_R = 20.1$  min (major enantiomer); 89% *ee*. <sup>1</sup>H NMR (400 MHz, CDCl<sub>3</sub>):  $\delta$  10.36 (s, 1H, NH), 7.62–7.60 (m, 2H, ArH), 7.54–7.46 (m, 3H, ArH), 7.33–7.25 (m, 2H, ArH), 6.96 (t,  $J = 7.6$  Hz, 1H, ArH), 6.91 (d,  $J = 8.0$  Hz, 1H, ArH), 4.36 (s, 1H, CH), 3.83 (s, 4H, OCH<sub>3</sub> + CH<sub>2</sub>), 2.93 (dd,  $J = 19.8, 4.2$  Hz, 1H, CH<sub>2</sub>), 2.06 (s, 3H, CH<sub>3</sub>) ppm; <sup>13</sup>C NMR (100 MHz, CDCl<sub>3</sub>):  $\delta$  175.0, 166.7, 166.5, 162.9, 156.2, 136.7, 131.4, 129.0, 127.5, 124.1, 121.6, 114.3, 111.0, 108.0, 60.8, 55.0, 34.1, 12.3 ppm. HRMS (ESI):  $m/z$  calcd. for C<sub>23</sub>H<sub>20</sub>N<sub>3</sub>O<sub>3</sub> [M + H]<sup>+</sup> 386.1499, found 386.1492.

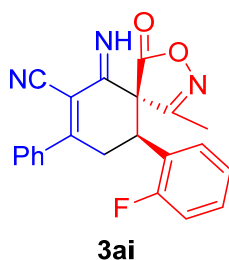

**(5*S*,10*R*)-10-(2-Fluorophenyl)-6-imino-4-methyl-1-oxo-8-phenyl-2-oxa-3-azaspiro[4.5]deca-3,7-diene-7-carbonitrile (3ai).** Employing the general procedure and purified by silica gel (200-300 mesh) column chromatography using petroleum ether/ethyl acetate (5:1 v/v) as

eluent to obtain **3ai** as a white solid (23.5 mg, 63% yield), m. p. 82–84 °C. HPLC (Daicel Chiralpak IC, *n*-hexane/isopropanol = 65:35, flow rate 1.0 mL/min, detection at 254 nm): major diastereomer:  $t_R = 13.0$  min (minor enantiomer),  $t_R = 22.2$  min (major enantiomer); 56% *ee*.  $[\alpha]_D^{25} = -33.6$  ( $c = 0.50$ ,  $\text{CH}_2\text{Cl}_2$ ).  $^1\text{H}$  NMR (400 MHz,  $\text{CDCl}_3$ ):  $\delta$  10.47 (s, 1H, NH), 7.62–7.60 (m, 2H, ArH), 7.54–7.48 (m, 3H, ArH), 7.38–7.32 (m, 2H, ArH), 7.19 (t,  $J = 7.6$  Hz, 1H, ArH), 7.12 (t,  $J = 9.4$  Hz, 1H, ArH), 4.20 (dd,  $J_1 = 12.0$  Hz,  $J_2 = 4.4$  Hz, 1H, CH), 3.85 (dd,  $J_1 = 19.6$  Hz,  $J_2 = 12.0$  Hz, 1H,  $\text{CH}_2$ ), 2.99 (dd,  $J_1 = 19.4$  Hz,  $J_2 = 4.6$  Hz, 1H,  $\text{CH}_2$ ), 2.13 (s, 3H,  $\text{CH}_3$ ) ppm;  $^{13}\text{C}$  NMR (100 MHz,  $\text{CDCl}_3$ ):  $\delta$  174.8, 166.4, 165.4, 162.0, 159.7 (d,  $^1J_{\text{C-F}} = 244.3$  Hz), 136.5, 131.6, 130.7 (d,  $^3J_{\text{C-F}} = 8.7$  Hz), 129.1, 127.52 (d,  $^4J_{\text{C-F}} = 2.4$  Hz), 127.46, 125.7 (d,  $^3J_{\text{C-F}} = 3.6$  Hz), 122.9 (d,  $^2J_{\text{C-F}} = 13.5$  Hz), 116.2 (d,  $^2J_{\text{C-F}} = 23.0$  Hz), 114.0, 108.2, 60.9, 34.5 (d,  $^3J_{\text{C-F}} = 4.5$  Hz), 33.7, 12.1 (d,  $^4J_{\text{C-F}} = 4.8$  Hz) ppm.  $^{19}\text{F}$  NMR (376 MHz,  $\text{CDCl}_3$ ):  $\delta$  -114.3 ppm. HRMS (ESI):  $m/z$  calcd. for  $\text{C}_{22}\text{H}_{17}\text{FN}_3\text{O}_2$   $[\text{M} + \text{H}]^+$  374.1299, found 374.1294.

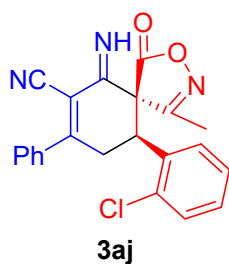

**(5*S*,10*R*)-10-(2-Chlorophenyl)-6-imino-4-methyl-1-oxo-8-phenyl-2-oxa-3-azaspiro[4.5]deca-3,7-diene-7-carbonitrile (3aj)**. Employing the general procedure and purified by silica gel (200–300 mesh) column chromatography using petroleum ether/ethyl acetate (5:1 v/v) as eluent to obtain **3aj** as a white solid (22.2 mg, 57% yield), m. p. 83–88 °C. HPLC (Daicel Chiralpak IC, *n*-hexane/isopropanol = 65:35, flow rate 1.0 mL/min, detection at 254 nm): major diastereomer:  $t_R = 13.5$  min (minor enantiomer),  $t_R = 24.7$  min (major enantiomer); 51% *ee*.  $[\alpha]_D^{25} = -31.4$  ( $c = 0.70$ ,  $\text{CH}_2\text{Cl}_2$ ).  $^1\text{H}$  NMR (400 MHz,  $\text{CDCl}_3$ ):  $\delta$  10.44 (s, 1H, NH), 7.61 (dd,  $J = 7.8, 1.8$  Hz, 2H, ArH), 7.55–7.44 (m, 4H, ArH), 7.37–7.28 (m, 3H, ArH), 4.42 (dd,  $J_1 = 12.0$  Hz,  $J_2 = 4.4$  Hz, 1H, CH), 3.66 (dd,  $J_1 = 19.8$  Hz,  $J_2 = 11.8$  Hz, 1H,  $\text{CH}_2$ ), 3.02 (dd,  $J_1 = 19.6$  Hz,  $J_2 = 4.4$  Hz, 1H,  $\text{CH}_2$ ), 2.09 (s, 3H,  $\text{CH}_3$ ) ppm;  $^{13}\text{C}$  NMR (100 MHz,  $\text{CDCl}_3$ ):  $\delta$  174.9, 166.4, 165.4, 162.3, 136.3, 133.8, 133.1, 131.6, 130.6, 130.2, 129.1, 128.6, 127.5, 127.0, 114.0, 108.0, 60.4, 38.8, 34.4, 12.5 ppm. HRMS (ESI):  $m/z$  calcd. for  $\text{C}_{22}\text{H}_{17}\text{ClN}_3\text{O}_2$   $[\text{M} + \text{H}]^+$  390.1004, found 390.1018.



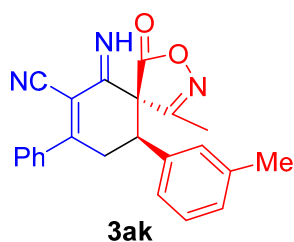

**(5*S*,10*R*)-6-Imino-4-methyl-1-oxo-8-phenyl-10-(*m*-tolyl)-2-oxa-3-azaspiro[4.5]deca-3,7-diene-7-carbonitrile (3ak).** Employing the general procedure and purified by silica gel (200-300 mesh) column chromatography using petroleum ether/ethyl acetate (5:1 v/v) as eluent to obtain **3ak** as a white solid (21.4 mg, 58% yield), m. p. 82–84 °C. HPLC (Daicel Chiralpak IC, *n*-hexane/isopropanol = 65:35, flow rate 1.0 mL/min, detection at 254 nm): major diastereomer:  $t_R$  = 13.4 min (minor enantiomer),  $t_R$  = 22.5 min (major enantiomer); 85% *ee*.  $[\alpha]_D^{25}$  =  $-25.7$  ( $c$  = 0.90, CH<sub>2</sub>Cl<sub>2</sub>). <sup>1</sup>H NMR (400 MHz, CDCl<sub>3</sub>):  $\delta$  10.41 (s, 1H, NH), 7.61 (dd,  $J_1$  = 7.8 Hz,  $J_2$  = 1.8 Hz, 2H, ArH), 7.53–7.47 (m, 3H, ArH), 7.27–7.23 (m, 1H, ArH), 7.16 (d,  $J$  = 7.6 Hz, 1H, ArH), 7.16 (d,  $J$  = 6.8 Hz, 2H, ArH), 3.88 (dd,  $J_1$  = 19.8 Hz, 11.8 Hz, 1H, CH<sub>2</sub>), 3.59 (dd,  $J_1$  = 12.0 Hz, 4.4 Hz,  $J_2$  = 1H, CH), 3.03 (dd,  $J_1$  = 19.6 Hz,  $J_2$  = 4.4 Hz, 1H, CH<sub>2</sub>), 2.33 (s, 3H, CH<sub>3</sub>), 2.1 (s, 3H, CH<sub>3</sub>) ppm; <sup>13</sup>C NMR (100 MHz, CDCl<sub>3</sub>):  $\delta$  174.7, 166.2, 165.7, 162.2, 139.5, 136.6, 135.7, 131.5, 130.0, 129.4, 129.0, 127.7, 127.4, 124.3, 114.1, 108.0, 61.2, 44.1, 34.5, 21.4, 12.8 ppm. HRMS (ESI):  $m/z$  calcd. for C<sub>23</sub>H<sub>20</sub>N<sub>3</sub>O<sub>2</sub> [M + H]<sup>+</sup> 370.1550, found 370.1556.

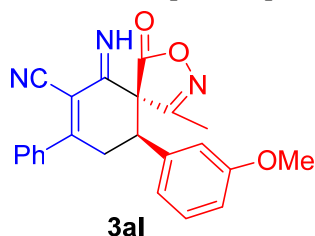

**(5*S*,10*R*)-6-Imino-10-(3-methoxyphenyl)-4-methyl-1-oxo-8-phenyl-2-oxa-3-azaspiro[4.5]deca-3,7-diene-7-carbonitrile (3al).** Employing the general procedure and purified by silica gel (200-300 mesh) column chromatography using petroleum ether/ethyl acetate (5:1 v/v) as eluent to obtain **3al** as a white solid (26.9 mg, 70% yield), m. p. 81–83 °C. HPLC (Daicel Chiralpak IC, *n*-hexane/ethyl acetate = 80:20, flow rate 1.0 mL/min, detection at 254 nm): major diastereomer:  $t_R$  = 9.4 min (minor enantiomer),  $t_R$  = 14.7 min (major enantiomer); 82% *ee*.  $[\alpha]_D^{25}$  =  $-64.6$  ( $c$  = 0.70, CH<sub>2</sub>Cl<sub>2</sub>). <sup>1</sup>H NMR (400 MHz, CDCl<sub>3</sub>):  $\delta$  10.41 (s, 1H, NH), 7.61–7.59 (m, 2H, ArH), 7.55–7.48 (m, 3H, ArH), 7.29 (t,  $J$  = 8.0 Hz, 1H, ArH), 6.88 (dd,  $J_1$  = 8.2 Hz,  $J_2$  = 2.2 Hz, 1H, ArH), 6.82 (d,  $J$  = 7.6 Hz, 1H, ArH), 6.77 (s, 1H, ArH),

3.87 (dd,  $J_1 = 19.6$  Hz,  $J_2 = 12.0$  Hz, 1H, CH<sub>2</sub>), 3.79 (s, 3H, OCH<sub>3</sub>), 3.60 (dd,  $J_1 = 11.8$  Hz,  $J_2 = 4.2$  Hz, 1H, CH), 3.04 (dd,  $J_1 = 19.6$  Hz,  $J_2 = 4.4$  Hz, 1H, CH<sub>2</sub>), 2.11 (s, 3H, CH<sub>3</sub>) ppm; <sup>13</sup>C NMR (100 MHz, CDCl<sub>3</sub>):  $\delta$  174.8, 166.1, 165.6, 162.1, 137.2, 136.5, 131.6, 130.7, 129.1, 127.5, 119.3, 114.3, 114.1, 113.1, 108.1, 61.2, 55.3, 44.1, 34.4, 12.8 ppm. HRMS (ESI):  $m/z$  calcd. for C<sub>23</sub>H<sub>20</sub>N<sub>3</sub>O<sub>3</sub> [M + H]<sup>+</sup> 386.1499, found 386.1500.

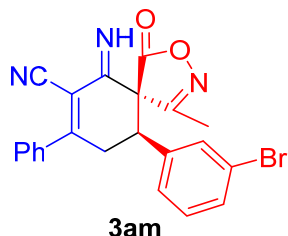

**(5S,10R)-10-(3-Bromophenyl)-6-imino-4-methyl-1-oxo-8-phenyl-2-oxa-3-azaspiro[4.5]deca-3,7-diene-7-carbonitrile (3am).** Employing the general procedure and purified by silica gel (200-300 mesh) column chromatography using petroleum ether/ethyl acetate (5:1 v/v) as eluent to obtain **3am** as a white solid (23.5 mg, 54% yield), m. p. 71–73 °C. HPLC (Daicel Chiralpak IC, *n*-hexane/ethyl acetate = 85:15, flow rate 1.0 mL/min, detection at 254 nm): major diastereomer:  $t_R = 11.0$  min (minor enantiomer),  $t_R = 17.1$  min (major enantiomer); 62% *ee*.  $[\alpha]_D^{25} = -27.8$  ( $c = 0.40$ , CH<sub>2</sub>Cl<sub>2</sub>). <sup>1</sup>H NMR (400 MHz, CDCl<sub>3</sub>):  $\delta$  10.46 (s, 1H, NH), 7.61–7.59 (m, 2H, ArH), 7.54–7.48 (m, 4H, ArH), 7.39 (s, 1H, ArH), 7.28–7.24 (t,  $J = 8.0$  Hz, 1H, ArH), 7.20 (d,  $J = 8.0$  Hz, 1H, ArH), 3.86 (dd,  $J_1 = 19.6$  Hz,  $J_2 = 12.0$  Hz, 1H, CH), 3.59 (dd,  $J_1 = 12.0$  Hz,  $J_2 = 4.4$  Hz, 1H, CH<sub>2</sub>), 3.03 (dd,  $J_1 = 19.4$  Hz,  $J_2 = 4.2$  Hz, 1H, CH<sub>2</sub>), 2.12 (s, 3H, CH<sub>3</sub>) ppm; <sup>13</sup>C NMR (100 MHz, CDCl<sub>3</sub>):  $\delta$  174.4, 165.9, 165.1, 161.8, 138.0, 136.4, 132.5, 131.7, 131.3, 130.6, 129.1, 127.4, 125.5, 123.5, 113.9, 108.1, 61.0, 43.6, 34.2, 12.8 ppm. HRMS (ESI):  $m/z$  calcd. for C<sub>22</sub>H<sub>17</sub><sup>79</sup>BrN<sub>3</sub>O<sub>2</sub> [M + H]<sup>+</sup> 434.0499, found 434.0515; calcd. for C<sub>22</sub>H<sub>17</sub><sup>81</sup>BrN<sub>3</sub>O<sub>2</sub> [M + H]<sup>+</sup> 436.0478, found 436.0497.

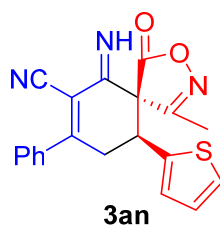

**(5S,10R)-6-Imino-4-methyl-1-oxo-8-phenyl-10-(thiophen-2-yl)-2-oxa-3-azaspiro[4.5]deca-3,7-diene-7-carbonitrile (3an).** Employing the general procedure and purified by silica gel (200-300 mesh) column chromatography using petroleum ether/ethyl acetate (5:1 v/v) as eluent to obtain **3an** as a pale yellow solid (27.1 mg, 75% yield), m. p. 83–85 °C. HPLC

(Daicel Chiralpak IC, *n*-hexane/ethyl acetate = 85:15, flow rate 1.0 mL/min, detection at 254 nm): major diastereomer:  $t_R = 18.4$  min (minor enantiomer),  $t_R = 28.2$  min (major enantiomer); 92% *ee*.  $[\alpha]_D^{25} = -60.0$  ( $c = 0.35$ ,  $\text{CH}_2\text{Cl}_2$ ).  $^1\text{H}$  NMR (400 MHz,  $\text{CDCl}_3$ ):  $\delta$  10.47 (s, 1H, NH), 7.62–7.60 (m, 2H, ArH), 7.54–7.49 (m, 3H, ArH), 7.27–7.26 (m, 1H, =CH), 7.03–7.00 (m, 2H, =CH), 3.99–3.88 (m, 2H, CH+CH<sub>2</sub>), 3.16 (dd,  $J_1 = 16.6$  Hz,  $J_2 = 1.4$  Hz, 1H, CH<sub>2</sub>), 2.18 (s, 3H, CH<sub>3</sub>) ppm;  $^{13}\text{C}$  NMR (100 MHz,  $\text{CDCl}_3$ ):  $\delta$  174.2, 165.9, 164.8, 161.6, 137.5, 136.4, 131.7, 129.1, 127.8, 127.5, 125.9, 125.6, 114.0, 108.2, 61.8, 38.6, 35.3, 12.8 ppm. HRMS (ESI):  $m/z$  calcd. for  $\text{C}_{20}\text{H}_{16}\text{N}_3\text{O}_2\text{S}$   $[\text{M} + \text{H}]^+$  362.0958, found 362.0955.

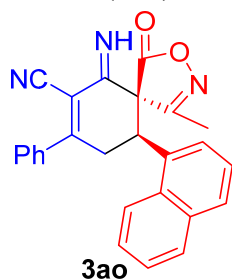

**(5*S*,10*R*)-6-Imino-4-methyl-10-(naphthalen-1-yl)-1-oxo-8-phenyl-2-oxa-3-azaspiro[4.5]deca-3,7-diene-7-carbonitrile (3ao).** Employing the general procedure and purified by silica gel (200-300 mesh) column chromatography using petroleum ether/ethyl acetate (5:1 v/v) as eluent to obtain **3ao** as a white solid (31.6 mg, 78% yield), m. p. 105–107 °C. HPLC (Daicel Chiralpak IC, *n*-hexane/isopropanol = 65:35, flow rate 1.0 mL/min, detection at 254 nm): major diastereomer:  $t_R = 14.7$  min (minor enantiomer),  $t_R = 30.2$  min (major enantiomer); 88% *ee*.  $[\alpha]_D^{25} = -50.8$  ( $c = 0.85$ ,  $\text{CH}_2\text{Cl}_2$ ).  $^1\text{H}$  NMR (400 MHz,  $\text{CDCl}_3$ ):  $\delta$  10.46 (s, 1H, NH), 8.08 (d,  $J = 8.4$  Hz, 1H, ArH), 7.93 (d,  $J = 7.6$  Hz, 1H, ArH), 7.86 (d,  $J = 7.2$  Hz, 1H, ArH), 7.63–7.46 (m, 9H, ArH), 4.65 (dd,  $J_1 = 11.6$  Hz,  $J_2 = 4.4$  Hz, 1H, CH), 3.88 (dd,  $J_1 = 20.0$  Hz,  $J_2 = 11.6$  Hz, 1H, CH<sub>2</sub>), 3.15 (dd,  $J_1 = 19.8$  Hz,  $J_2 = 4.2$  Hz, 1H, CH<sub>2</sub>), 1.86 (s, 3H, CH<sub>3</sub>) ppm;  $^{13}\text{C}$  NMR (100 MHz,  $\text{CDCl}_3$ ):  $\delta$  175.1, 166.3, 166.0, 162.8, 136.4, 134.3, 132.1, 131.6, 130.5, 129.9, 129.5, 129.1, 127.5, 127.2, 126.2, 125.9, 123.8, 121.0, 114.2, 107.9, 60.9, 37.3, 35.5, 12.8 ppm. HRMS (ESI):  $m/z$  calcd. for  $\text{C}_{26}\text{H}_{20}\text{N}_3\text{O}_2$   $[\text{M} + \text{H}]^+$  406.1550, found 406.1549.

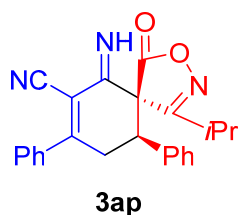

**(5*S*,10*R*)-6-Imino-4-isopropyl-1-oxo-8,10-diphenyl-2-oxa-3-azaspiro[4.5]deca-3,7-diene-7-carbonitrile (3ap)**. Employing the general procedure and purified by silica gel (200-300 mesh) column chromatography using petroleum ether/ethyl acetate (5:1 v/v) as eluent to obtain **3ap** as a white solid (17.3 mg, 45% yield), m. p. 83–85 °C. HPLC (Daicel Chiralpak IA, *n*-hexane/isopropanol = 70:30, flow rate 1.0 mL/min, detection at 254 nm): major diastereomer:  $t_R = 6.7$  min (major enantiomer),  $t_R = 7.9$  min (minor enantiomer); 96% *ee*.  $[\alpha]_D^{25} = -45.6$  ( $c = 0.85$ , CH<sub>2</sub>Cl<sub>2</sub>). <sup>1</sup>H NMR (400 MHz, CDCl<sub>3</sub>):  $\delta$  10.49 (s, 1H, NH), 7.61 (dd,  $J_1 = 7.6$  Hz,  $J_2 = 1.6$  Hz, 2H, ArH), 7.54–7.47 (m, 3H, ArH), 7.39–7.34 (m, 3H, ArH), 7.27–7.24 (m, 2H, ArH), 3.88 (dd,  $J_1 = 19.2$  Hz,  $J_2 = 12.0$  Hz, 1H, CH<sub>2</sub>), 3.72 (dd,  $J_1 = 11.8$  Hz,  $J_2 = 4.2$  Hz, 1H, CH), 3.00 (dd,  $J = 19.2$  Hz,  $J_2 = 4.0$  Hz, 1H, CH<sub>2</sub>), 2.69–2.59 (m, 1H, CH), 1.30 (d,  $J = 6.8$  Hz, 3H, CH<sub>3</sub>), 1.01 (d,  $J = 6.8$  Hz, 3H, CH<sub>3</sub>) ppm; <sup>13</sup>C NMR (100 MHz, CDCl<sub>3</sub>):  $\delta$  175.4, 172.9, 165.3, 162.6, 136.54, 136.49, 131.6, 129.5, 129.0, 127.5, 127.4, 114.2, 108.1, 61.8, 44.0, 35.4, 28.7, 22.1, 19.8 ppm. HRMS (ESI):  $m/z$  calcd. for C<sub>24</sub>H<sub>22</sub>N<sub>3</sub>O<sub>2</sub> [M + H]<sup>+</sup> 384.1707, found 384.1697.

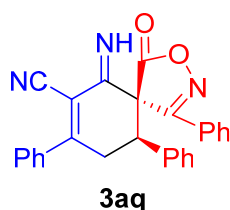

**(5*S*,10*R*)-6-Imino-1-oxo-4,8,10-triphenyl-2-oxa-3-azaspiro[4.5]deca-3,7-diene-7-carbonitrile (3aq)**. Employing the general procedure and purified by silica gel (200-300 mesh) column chromatography using petroleum ether/ethyl acetate (5:1 v/v) as eluent to obtain **3aq** as a white solid (54.4 mg, 57% yield), m. p. 77–79 °C. HPLC (Daicel Chiralpak IC, *n*-hexane/isopropanol = 65:35, flow rate 1.0 mL/min, detection at 254 nm): major diastereomer:  $t_R = 18.9$  min (minor enantiomer),  $t_R = 22.4$  min (major enantiomer); 90% *ee*.  $[\alpha]_D^{25} = -15.1$  ( $c = 0.80$ , CH<sub>2</sub>Cl<sub>2</sub>). <sup>1</sup>H NMR (400 MHz, CDCl<sub>3</sub>):  $\delta$  10.61 (s, 1H, NH), 7.67 (dd,  $J_1 = 7.6$  Hz,  $J_2 = 2.0$  Hz, 2H, ArH), 7.58–7.50 (m, 6H, ArH), 7.46 (t,  $J = 7.6$  Hz, 2H, ArH), 7.29–7.26 (m, 1H, ArH), 7.19 (t,  $J = 7.4$  Hz, 2H, ArH), 6.84 (d,  $J = 7.2$  Hz, 2H, ArH), 4.03 (dd,  $J_1 = 18.8$  Hz,  $J_2 = 12.0$  Hz, 1H, CH), 3.92 (dd,  $J_1 = 12.2$  Hz,  $J_2 = 3.8$  Hz, 1H, CH<sub>2</sub>), 3.05 (dd,  $J_1 = 19.0$  Hz,  $J_2 = 3.8$  Hz, 1H, CH<sub>2</sub>) ppm; <sup>13</sup>C NMR (100 MHz, CDCl<sub>3</sub>):  $\delta$  174.9, 166.3, 165.4, 162.9, 136.7, 135.1, 132.7, 131.8, 131.7, 131.3, 129.6, 129.1, 129.0, 127.8,

127.6, 126.9, 114.2, 108.2, 61.7, 44.2, 33.7 ppm. HRMS (ESI):  $m/z$  calcd. for  $C_{27}H_{20}N_3O_2$  [ $M + H$ ]<sup>+</sup> 418.1550, found 418.1545.

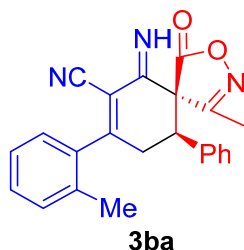

**(5*S*,10*R*)-6-Imino-4-methyl-1-oxo-10-phenyl-8-(*o*-tolyl)-2-oxa-3-azaspiro[4.5]deca-3,7-diene-7-carbonitrile (3ba).** Employing the general procedure and purified by silica gel (200-300 mesh) column chromatography using petroleum ether/ethyl acetate (5:1 v/v) as eluent to obtain **3ba** as a white solid (23.3 mg, 63% yield), m. p. 99–101 °C. HPLC (Daicel Chiralpak IC, *n*-hexane/isopropanol = 65:35, flow rate 1.0 mL/min, detection at 254 nm): major diastereomer:  $t_R$  = 9.4 min (minor enantiomer),  $t_R$  = 14.1 min (major enantiomer); 76% *ee*.  $[\alpha]_D^{25}$  =  $-31.8$  ( $c$  = 0.60,  $CH_2Cl_2$ ). <sup>1</sup>H NMR (400 MHz,  $CDCl_3$ ):  $\delta$  10.35 (s, 1H, NH), 7.36–7.22 (m, 9H, ArH), 3.77 (dd,  $J_1$  = 19.0 Hz,  $J_2$  = 11.8 Hz, 1H,  $CH_2$ ), 3.65 (d,  $J$  = 10.4 Hz, 1H, CH), 2.87 (dd,  $J_1$  = 20.0 Hz,  $J_2$  = 4.0 Hz, 1H,  $CH_2$ ), 2.47 (s, 3H,  $CH_3$ ), 2.12 (s, 3H,  $CH_3$ ) ppm; <sup>13</sup>C NMR (100 MHz,  $CDCl_3$ ):  $\delta$  174.6, 166.1, 161.9, 136.8, 135.6, 131.1, 130.0, 129.6, 129.3, 127.1, 126.4, 113.1, 110.8, 61.2, 44.2, 35.9, 19.3, 12.8 ppm. HRMS (ESI):  $m/z$  calcd. for  $C_{23}H_{20}N_3O_2$  [ $M + H$ ]<sup>+</sup> 370.1550, found 370.1540.

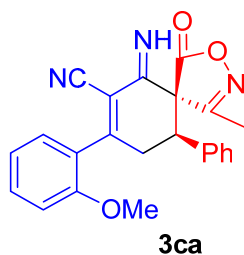

**(5*S*,10*R*)-6-Imino-8-(2-methoxyphenyl)-4-methyl-1-oxo-10-phenyl-2-oxa-3-azaspiro[4.5]deca-3,7-diene-7-carbonitrile (3ca).** Employing the general procedure and purified by silica gel (200-300 mesh) column chromatography using petroleum ether/ethyl acetate (5:1 v/v) as eluent to obtain **3ca** as a white solid (21.6 mg, 56% yield), m. p. 83–85 °C. HPLC (Daicel Chiralpak IC, *n*-hexane/ethyl acetate = 80:20, flow rate 1.0 mL/min, detection at 254 nm): major diastereomer:  $t_R$  = 9.3 min (minor enantiomer),  $t_R$  = 12.7 min (major enantiomer); 86% *ee*.  $[\alpha]_D^{25}$  =  $-61.0$  ( $c$  = 0.50,  $CH_2Cl_2$ ). <sup>1</sup>H NMR (400 MHz,  $CDCl_3$ ):  $\delta$  10.33 (s, 1H,

NH), 7.47–7.43 (m, 1H, ArH), 7.37–7.34 (m, 4H, ArH), 7.26–7.23 (m, 2H, ArH), 7.07 (t,  $J = 7.4$  Hz, 1H, ArH), 6.99 (d,  $J = 8.4$  Hz, 1H, ArH), 3.87 (s, 3H, OCH<sub>3</sub>), 3.77 (dd,  $J_1 = 19.2$  Hz,  $J_2 = 12.0$  Hz, 1H, CH), 3.64 (dd,  $J_1 = 12.0$  Hz,  $J_2 = 4.0$  Hz, 1H, CH<sub>2</sub>), 3.12 (dd,  $J_1 = 19.6$  Hz,  $J_2 = 4.0$  Hz, 1H, CH<sub>2</sub>), 2.12 (s, 3H, CH<sub>3</sub>) ppm; <sup>13</sup>C NMR (100 MHz, CDCl<sub>3</sub>):  $\delta$  174.7, 166.2, 166.0, 162.2, 156.0, 136.0, 132.3, 129.5, 129.1, 128.9, 127.2, 125.9, 121.0, 113.7, 111.5, 110.0, 61.5, 55.7, 44.2, 33.8, 12.8 ppm. HRMS (ESI):  $m/z$  calcd. for C<sub>23</sub>H<sub>20</sub>N<sub>3</sub>O<sub>3</sub> [M + H]<sup>+</sup> 386.1499, found 386.1495.

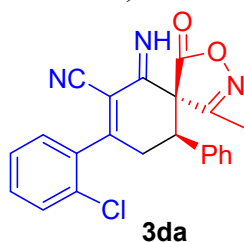

**(5S,10R)-8-(2-Chlorophenyl)-6-imino-4-methyl-1-oxo-10-phenyl-2-oxa-3-azaspiro[4.5]deca-3,7-diene-7-carbonitrile (3da).** Employing the general procedure and purified by silica gel (200-300 mesh) column chromatography using petroleum ether/ethyl acetate (5:1 v/v) as eluent to obtain **3da** as a white solid (31.6 mg, 81% yield), m. p. 91–93 °C. HPLC (Daicel Chiralpak IC, *n*-hexane/ethyl acetate = 85:15, flow rate 1.0 mL/min, detection at 254 nm): major diastereomer:  $t_R = 11.4$  min (minor enantiomer),  $t_R = 16.9$  min (major enantiomer); 91% *ee*.  $[\alpha]_D^{25} = -36.1$  ( $c = 0.75$ , CH<sub>2</sub>Cl<sub>2</sub>). <sup>1</sup>H NMR (400 MHz, CDCl<sub>3</sub>):  $\delta$  10.45 (s, 1H, NH), 7.51–7.49 (m, 1H, ArH), 7.46–7.42 (m, 3H, ArH), 7.36–7.35 (m, 3H, ArH), 7.26–7.23 (m, 2H, ArH), 3.67–3.64 (m, 2H, CH+CH<sub>2</sub>), 3.05 (s, 1H, CH<sub>2</sub>), 2.10 (s, 3H, CH<sub>3</sub>) ppm; <sup>13</sup>C NMR (100 MHz, CDCl<sub>3</sub>):  $\delta$  174.6, 166.0, 161.6, 136.0, 135.5, 131.5, 130.9, 130.3, 129.6, 129.3, 128.6, 127.6, 127.2, 112.6, 111.4, 61.3, 44.2, 34.4, 12.8 ppm. HRMS (ESI):  $m/z$  calcd. for C<sub>22</sub>H<sub>17</sub>ClN<sub>3</sub>O<sub>2</sub> [M + H]<sup>+</sup> 390.1004, found 390.0997.

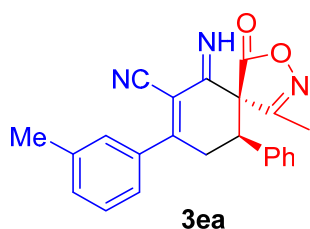

**(5S,10R)-6-Imino-4-methyl-1-oxo-10-phenyl-8-(*m*-tolyl)-2-oxa-3-azaspiro[4.5]deca-3,7-diene-7-carbonitrile (3ea).** Employing the general procedure and purified by silica gel (200-300 mesh) column chromatography using petroleum ether/ethyl acetate (5:1 v/v) as eluent to obtain **3ea** as a white solid (22.9 mg, 62% yield), m. p. 78–80 °C. HPLC (Daicel

Chiralpak IC, *n*-hexane/isopropanol = 65:35, flow rate 1.0 mL/min, detection at 254 nm): major diastereomer:  $t_R = 12.8$  min (minor enantiomer),  $t_R = 20.2$  min (major enantiomer); 77% *ee*.  $[\alpha]_D^{25} = -35.3$  ( $c = 0.60$ ,  $\text{CH}_2\text{Cl}_2$ ).  $^1\text{H NMR}$  (400 MHz,  $\text{CDCl}_3$ ):  $\delta$  10.40 (s, 1H, NH), 7.42–7.32 (m, 7H, ArH), 7.26–7.24 (m, 2H, ArH), 3.87 (dd,  $J_1 = 19.6$  Hz,  $J_2 = 12.0$  Hz, 1H, CH), 3.62 (dd,  $J_1 = 12.0$  Hz,  $J_2 = 4.4$  Hz, 1H,  $\text{CH}_2$ ), 3.04 (dd,  $J_1 = 19.6$  Hz,  $J_2 = 4.4$  Hz, 1H,  $\text{CH}_2$ ), 2.41 (s, 3H,  $\text{CH}_3$ ), 2.10 (s, 3H,  $\text{CH}_3$ ) ppm;  $^{13}\text{C NMR}$  (100 MHz,  $\text{CDCl}_3$ ):  $\delta$  174.7, 166.1, 165.9, 162.2, 139.0, 136.5, 135.8, 132.3, 129.6, 129.2, 128.9, 127.9, 127.2, 124.6, 114.1, 107.9, 61.3, 44.1, 35.9, 21.3, 12.8 ppm. HRMS (ESI):  $m/z$  calcd. for  $\text{C}_{23}\text{H}_{20}\text{N}_3\text{O}_2$   $[\text{M} + \text{H}]^+$  370.1550, found 370.1540.

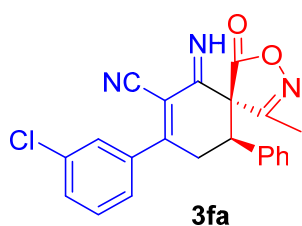

**(5*S*,10*R*)-8-(3-Chlorophenyl)-6-imino-4-methyl-1-oxo-10-phenyl-2-oxa-3-azaspiro[4.5]deca-3,7-diene-7-carbonitrile (3fa).** Employing the general procedure and purified by silica gel (200-300 mesh) column chromatography using petroleum ether/ethyl acetate (5:1 v/v) as eluent to obtain **3fa** as a white solid (35.0 mg, 90% yield), m. p. 86–88 °C. HPLC (Daicel Chiralpak IC, *n*-hexane/isopropanol = 65:35, flow rate 1.0 mL/min, detection at 254 nm): major diastereomer:  $t_R = 10.9$  min (minor enantiomer),  $t_R = 17.2$  min (major enantiomer); 86% *ee*.  $[\alpha]_D^{25} = -83.7$  ( $c = 0.65$ ,  $\text{CH}_2\text{Cl}_2$ ).  $^1\text{H NMR}$  (400 MHz,  $\text{CDCl}_3$ ):  $\delta$  10.48 (s, 1H, NH), 7.55–7.49 (m, 3H, ArH), 7.45 (t,  $J = 7.8$  Hz, 1H, ArH), 7.38–7.36 (m, 3H, ArH), 7.26–7.23 (m, 2H, ArH), 3.86 (dd,  $J_1 = 19.8$  Hz,  $J_2 = 11.8$  Hz, 1H, CH), 3.63 (dd,  $J_1 = 12.0$  Hz,  $J_2 = 4.4$  Hz, 1H,  $\text{CH}_2$ ), 2.99 (dd,  $J_1 = 20.0$  Hz,  $J_2 = 4.4$  Hz, 1H,  $\text{CH}_2$ ), 2.10 (s, 3H,  $\text{CH}_3$ ) ppm;  $^{13}\text{C NMR}$  (100 MHz,  $\text{CDCl}_3$ ):  $\delta$  174.6, 166.0, 163.8, 161.8, 138.2, 135.4, 135.2, 131.4, 130.5, 129.7, 129.4, 127.3, 127.1, 125.6, 113.6, 108.9, 61.2, 44.1, 34.5, 12.8 ppm. HRMS (ESI):  $m/z$  calcd. for  $\text{C}_{22}\text{H}_{17}\text{ClN}_3\text{O}_2$   $[\text{M} + \text{H}]^+$  390.1004, found 390.0989.

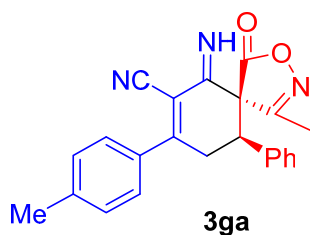

**(5*S*,10*R*)-6-Imino-4-methyl-1-oxo-10-phenyl-8-(*p*-tolyl)-2-oxa-3-azaspiro[4.5]deca-3,7-diene-7-carbonitrile (3ga).** Employing the general procedure and purified by silica gel (200-300 mesh) column chromatography using petroleum ether/ethyl acetate (5:1 v/v) as eluent to obtain **3ga** as a white solid (22.5 mg, 61% yield), m. p. 144–146 °C. HPLC (Daicel Chiralpak IC, *n*-hexane/isopropanol = 65:35, flow rate 1.0 mL/min, detection at 254 nm): major diastereomer:  $t_R = 9.8$  min (minor enantiomer),  $t_R = 14.7$  min (major enantiomer); 85% *ee*.  $[\alpha]_D^{25} = -8.4$  ( $c = 0.50$ , CH<sub>2</sub>Cl<sub>2</sub>). <sup>1</sup>H NMR (400 MHz, CDCl<sub>3</sub>):  $\delta$  10.36 (s, 1H, NH), 7.52 (d,  $J = 8.4$  Hz, 2H, ArH), 7.37–7.35 (m, 3H, ArH), 7.30 (d,  $J = 8.0$  Hz, 2H, ArH), 7.26–7.23 (m, 2H, ArH), 3.86 (dd,  $J_1 = 19.4$  Hz,  $J_2 = 11.8$  Hz, 1H, CH<sub>2</sub>), 3.62 (dd,  $J_1 = 11.8$  Hz,  $J_2 = 4.2$  Hz, 1H, CH), 3.04 (dd,  $J_1 = 19.6$  Hz,  $J_2 = 4.4$  Hz, 1H, CH<sub>2</sub>), 2.41 (s, 3H, CH<sub>3</sub>), 2.09 (s, 3H, CH<sub>3</sub>) ppm; <sup>13</sup>C NMR (100 MHz, CDCl<sub>3</sub>):  $\delta$  174.7, 166.2, 165.5, 162.3, 142.4, 135.8, 133.6, 129.7, 129.6, 129.2, 127.5, 127.2, 114.4, 107.3, 61.3, 44.1, 34.1, 21.5, 12.7 ppm. HRMS (ESI):  $m/z$  calcd. For C<sub>23</sub>H<sub>20</sub>N<sub>3</sub>O<sub>2</sub> [M + H]<sup>+</sup> 370.1550, found 370.1542.

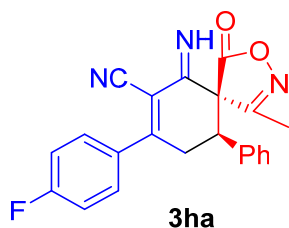

**(5*S*,10*R*)-8-(4-Fluorophenyl)-6-imino-4-methyl-1-oxo-10-phenyl-2-oxa-3-azaspiro[4.5]deca-3,7-diene-7-carbonitrile (3ha).** Employing the general procedure and purified by silica gel (200-300 mesh) column chromatography using petroleum ether/ethyl acetate (5:1 v/v) as eluent to obtain **3ha** as a white solid (26.5 mg, 71% yield), m. p. 82–84 °C. HPLC (Daicel Chiralpak IC, *n*-hexane/ethyl acetate = 80:20, flow rate 1.0 mL/min, detection at 254 nm): major diastereomer:  $t_R = 9.0$  min (minor enantiomer),  $t_R = 12.3$  min (major enantiomer); 88% *ee*.  $[\alpha]_D^{25} = -51.1$  ( $c = 0.90$ , CH<sub>2</sub>Cl<sub>2</sub>). <sup>1</sup>H NMR (400 MHz, CDCl<sub>3</sub>):  $\delta$  10.40 (s, 1H, NH), 7.65–7.62 (m, 2H, ArH), 7.38–7.37 (m, 3H, ArH), 7.26–7.18 (m, 4H, ArH), 3.87 (dd,  $J_1 = 19.6$  Hz,  $J_2 = 12.0$  Hz, 1H, CH), 3.63 (dd,  $J_1 = 11.6$  Hz,  $J_2 = 4.4$  Hz, 1H, CH<sub>2</sub>), 3.01 (dd,  $J_1 = 19.6$  Hz,  $J_2 = 4.4$  Hz, 1H, CH<sub>2</sub>), 2.10 (s, 3H, CH<sub>3</sub>) ppm; <sup>13</sup>C NMR (100 MHz, CDCl<sub>3</sub>):  $\delta$  174.7, 166.0, 164.5 (d,  $^1J_{C-F} = 252.5$  Hz), 164.2, 162.0, 135.6, 132.5 (d,  $^4J_{C-F} = 3.2$  Hz), 129.8 (d,  $^3J_{C-F} = 8.8$  Hz), 129.7, 129.3, 127.2, 116.4 (d,  $^2J_{C-F} = 21.9$  Hz), 114.0, 108.1, 61.2, 44.1, 34.4, 12.8 ppm. <sup>19</sup>F NMR (376 MHz, CDCl<sub>3</sub>):  $\delta$  -106.9 ppm. HRMS (ESI):  $m/z$  calcd. for C<sub>22</sub>H<sub>17</sub>FN<sub>3</sub>O<sub>2</sub> [M + H]<sup>+</sup> 374.1299, found 374.1297.



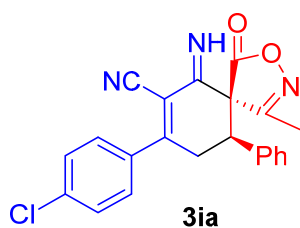

**(5*S*,10*R*)-8-(4-Chlorophenyl)-6-imino-4-methyl-1-oxo-10-phenyl-2-oxa-3-azaspiro[4.5]deca-3,7-diene-7-carbonitrile (3ia).** Employing the general procedure and purified by silica gel (200-300 mesh) column chromatography using petroleum ether/ethyl acetate (5:1 v/v) as eluent to obtain **3ia** as a white solid (26.5 mg, 68% yield), m. p. 70–72 °C. HPLC (Daicel Chiralpak IC, *n*-hexane/isopropanol = 65:35, flow rate 1.0 mL/min, detection at 254 nm): major diastereomer:  $t_R$  = 12.6 min (minor enantiomer),  $t_R$  = 20.2 min (major enantiomer); 88% *ee*.  $[\alpha]_D^{25}$  = –78.0 ( $c$  = 0.60, CH<sub>2</sub>Cl<sub>2</sub>). <sup>1</sup>H NMR (400 MHz, CDCl<sub>3</sub>):  $\delta$  10.45 (s, 1H, NH), 7.57–7.54 (m, 2H, ArH), 7.50–7.47 (m, 2H, ArH), 7.38–7.37 (m, 3H, ArH), 7.26–7.23 (m, 2H, ArH), 3.87 (dd,  $J_1$  = 19.6 Hz,  $J_2$  = 12.0 Hz, 1H, CH), 3.63 (dd,  $J_1$  = 12.0 Hz,  $J_2$  = 4.4 Hz, 1H, CH<sub>2</sub>), 3.00 (dd,  $J_1$  = 19.6 Hz,  $J_2$  = 4.4 Hz, 1H, CH<sub>2</sub>), 2.10 (s, 3H, CH<sub>3</sub>) ppm; <sup>13</sup>C NMR (100 MHz, CDCl<sub>3</sub>):  $\delta$  174.7, 166.0, 164.1, 161.9, 135.5, 135.3, 132.4, 129.7, 129.4, 129.0, 127.1, 126.3, 113.8, 108.4, 61.2, 44.1, 34.2, 12.8 ppm. HRMS (ESI):  $m/z$  calcd. for C<sub>22</sub>H<sub>17</sub>ClN<sub>3</sub>O<sub>2</sub> [M + H]<sup>+</sup> 390.1004, found 390.0993.

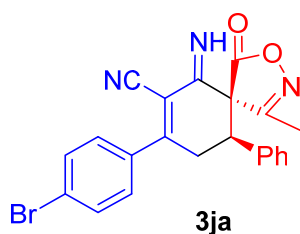

**(5*S*,10*R*)-8-(4-Bromophenyl)-6-imino-4-methyl-1-oxo-10-phenyl-2-oxa-3-azaspiro[4.5]deca-3,7-diene-7-carbonitrile (3ja).** Employing the general procedure and purified by silica gel (200-300 mesh) column chromatography using petroleum ether/ethyl acetate (5:1 v/v) as eluent to obtain **3ja** as a white solid (31.7 mg, 73% yield), m. p. 178–180 °C. HPLC (Daicel Chiralpak IC, *n*-hexane/ethyl acetate = 85:15, flow rate 1.0 mL/min, detection at 254 nm): major diastereomer:  $t_R$  = 15.3 min (minor enantiomer),  $t_R$  = 24.9 min (major enantiomer); 77% *ee*.  $[\alpha]_D^{25}$  = –65.8 ( $c$  = 0.55, CH<sub>2</sub>Cl<sub>2</sub>). <sup>1</sup>H NMR (400 MHz, CDCl<sub>3</sub>):  $\delta$  10.46 (s, 1H, NH), 7.65 (d,  $J$  = 8.4 Hz, 2H, ArH), 7.48 (d,  $J$  = 8.4 Hz, 2H, ArH), 7.38–7.37 (m, 3H, ArH), 7.26–7.23 (m, 2H, ArH), 3.87 (dd,  $J_1$  = 19.6 Hz,  $J_2$  = 12.0 Hz, 1H, CH), 3.62 (dd,  $J_1$  = 12.0 Hz,  $J_2$  = 4.4 Hz, 1H, CH<sub>2</sub>), 2.99 (dd,  $J_1$  = 19.6 Hz,  $J_2$  = 4.4 Hz, 1H, CH<sub>2</sub>), 2.10 (s, 3H, CH<sub>3</sub>),

CH<sub>3</sub>) ppm; <sup>13</sup>C NMR (100 MHz, CDCl<sub>3</sub>): δ 174.7, 166.0, 164.0, 161.9, 137.9, 135.5, 134.8, 129.7, 129.44, 129.37, 128.9, 127.2, 113.9, 108.4, 61.2, 44.1, 34.3, 12.8 ppm. HRMS (ESI): *m/z* calcd. for C<sub>22</sub>H<sub>17</sub><sup>79</sup>BrN<sub>3</sub>O<sub>2</sub> [M + H]<sup>+</sup> 434.0499, found 434.0483; calcd. for C<sub>22</sub>H<sub>17</sub><sup>81</sup>BrN<sub>3</sub>O<sub>2</sub> [M + H]<sup>+</sup> 436.0478, found 436.0465.

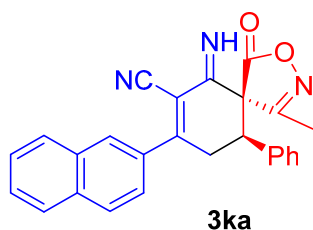

**(5*S*,10*R*)-6-imino-4-methyl-8-(naphthalen-2-yl)-1-oxo-10-phenyl-2-oxa-3-azaspiro[4.5]deca-3,7-diene-7-carbonitrile (3ka).** Employing the general procedure and purified by silica gel (200-300 mesh) column chromatography using petroleum ether/ethyl acetate (5:1 v/v) as eluent to obtain **3ka** as a white solid (29.6 mg, 73% yield), m. p. 85–87 °C. HPLC (Daicel Chiralpak IC, *n*-hexane/ethyl acetate = 80:20, flow rate 1.0 mL/min, detection at 254 nm): major diastereomer: *t<sub>R</sub>* = 10.6 min (minor enantiomer), *t<sub>R</sub>* = 17.1 min (major enantiomer); 76% *ee*. [ $\alpha$ ]<sub>D</sub><sup>25</sup> = –52.0 (*c* = 1.00, CH<sub>2</sub>Cl<sub>2</sub>). <sup>1</sup>H NMR (400 MHz, CDCl<sub>3</sub>): δ 10.45 (s, 1H, NH), 8.14 (d, *J* = 1.2 Hz, 1H, ArH), 7.95 (d, *J* = 8.4 Hz, 1H, ArH), 7.93–7.87 (m, 2H, ArH), 7.65 (dd, *J*<sub>1</sub> = 8.8 Hz, *J*<sub>2</sub> = 2.0 Hz, 1H, ArH), 7.62–7.55 (m, 2H, ArH), 7.41–7.37 (m, 3H, ArH), 7.29–7.26 (m, 2H, ArH), 3.98 (dd, *J*<sub>1</sub> = 19.6 Hz, *J*<sub>2</sub> = 12.0 Hz, 1H, CH<sub>2</sub>), 3.69 (dd, *J*<sub>1</sub> = 12.0 Hz, *J*<sub>2</sub> = 4.4 Hz, 1H, CH<sub>2</sub>), 3.17 (dd, *J*<sub>1</sub> = 19.6 Hz, *J*<sub>2</sub> = 4.4 Hz, 1H, CH<sub>2</sub>), 2.12 (s, 3H, CH<sub>3</sub>) ppm; <sup>13</sup>C NMR (100 MHz, CDCl<sub>3</sub>): δ 174.8, 166.2, 165.5, 162.2, 135.7, 134.4, 133.8, 132.6, 129.6, 129.3, 129.0, 128.8, 128.22, 128.16, 127.8, 127.3, 127.2, 123.8, 114.3, 108.2, 61.3, 44.2, 34.4, 12.8 ppm. HRMS (ESI): *m/z* calcd. for C<sub>26</sub>H<sub>20</sub>N<sub>3</sub>O<sub>2</sub> [M + H]<sup>+</sup> 406.1550, found 406.1540.

### 5. Scale-up synthesis of 3a

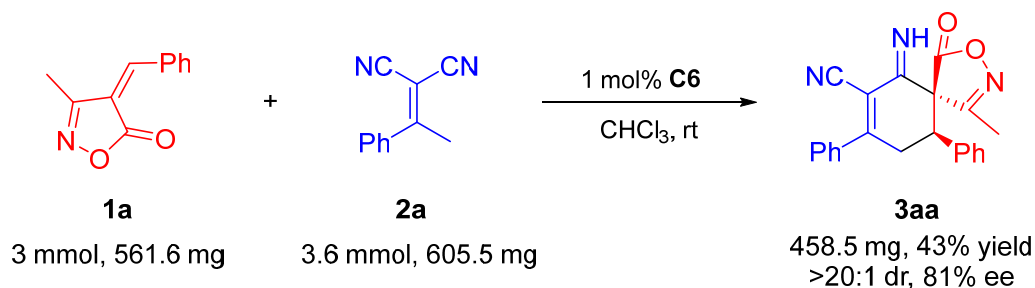

4-benzylidene-3-methylisoxazol-5(4*H*)-one **1a** (561.6 mg, 3 mmol), 2-(1-phenylethylidene)

malononitrile **2a** (605.5 mg, 3.6 mmol) and catalyst **C6** (18 mg, 1 mol%) were dissolved in chloroform (20 mL) at room temperature. After stirring at room temperature for 3 weeks, the reaction mixture was concentrated and directly purified by silica gel column chromatography (petroleum ether/ethyl acetate 5:1 v/v) to afford the desired product **3aa** as a white solid (458.5 mg, 43% yield) with >20:1 dr and 81% ee.

## 6. Procedure and the characterization data of compound **4**

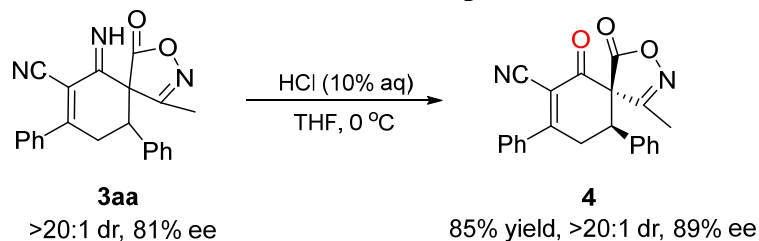

Add dilute hydrochloric acid (0.5 ml, 10% aq.) dropwise to the stirred solution of chiral product **3aa** (35.5 mg, 0.1 mmol) in tetrahydrofuran solution (0.5 mL) in an ice-water bath. After the solution was stirred for 10 min, saturated sodium bicarbonate (0.5 ml) was added to quench the reaction, then the mixture was extracted with dichloromethane (3 × 1 mL). The organic phase was dried with anhydrous Na<sub>2</sub>SO<sub>4</sub> and the solvent was removed under vacuum. The crude product was purified by flash column chromatography on silica gel (CH<sub>2</sub>Cl<sub>2</sub> as the eluent) to afford the pure product **4** as a white solid (30.3 mg, 85% yield), m. p. 101–103 °C. HPLC (Daicel Chiralpak IC, *n*-hexane/ethyl acetate = 87:13, flow rate 1.0 mL/min, detection at 254 nm): major diastereomer: *t*<sub>R</sub> = 18.7 min (major enantiomer), *t*<sub>R</sub> = 23.3 min (minor enantiomer); 89% ee. [ $\alpha$ ]<sub>D</sub><sup>25</sup> = -57.6 (*c* = 0.50, CH<sub>2</sub>Cl<sub>2</sub>). <sup>1</sup>H NMR (400 MHz, CDCl<sub>3</sub>):  $\delta$  7.68 (d, *J* = 7.2 Hz, 2H, ArH), 7.58 (t, *J* = 7.2 Hz, 1H, ArH), 7.52 (t, *J* = 7.4 Hz, 2H, ArH), 7.38–7.36 (m, 3H, ArH), 7.26–7.23 (m, 2H, ArH), 4.04 (dd, *J*<sub>1</sub> = 19.8 Hz, *J*<sub>2</sub> = 11.8 Hz, 1H, CH), 3.91 (dd, *J*<sub>1</sub> = 11.6 Hz, *J*<sub>2</sub> = 4.0 Hz, 1H, CH<sub>2</sub>), 3.20 (dd, *J*<sub>1</sub> = 19.6 Hz, *J*<sub>2</sub> = 4.0 Hz, 1H, CH<sub>2</sub>), 2.07 (s, 3H, CH<sub>3</sub>) ppm; <sup>13</sup>C NMR (100 MHz, CDCl<sub>3</sub>):  $\delta$  182.7, 175.4, 172.1, 164.8, 135.6, 135.0, 132.6, 129.7, 129.5, 129.2, 127.6, 127.0, 113.5, 110.0, 65.2, 44.5, 34.6, 12.7 ppm. HRMS (ESI): *m/z* calcd. for C<sub>22</sub>H<sub>17</sub>N<sub>2</sub>O<sub>3</sub> [M + H]<sup>+</sup> 357.1234, found 357.1230.

## 7. Reference

- [1] (a) R. H. Vekariya, K. D. Patel, H. D. Patel, *Res. Chem. Intermed.* **2016**, *42*, 7559–7579.  
(b) A. B. Rikani, D. Setamdideh, *Orient. J. Chem.* **2016**, *32*, 1433-1437. (c) R. Laroum, A. Debache, *Synth. Commun.* **2018**, *48*, 1876–1882.
- [2] (a) I. Liepuoniute, P. Commins, D. P. Karothu, S. Schramm, H. Hara and P. Naumov, *Chem. Eur. J.*, 2019, **25**, 373–378. (b) H. C. Wu, C. Wang, Y. H. Chen and Y. K. Liu, *Chem. Commun.*, 2021, **57**, 1762–1765.
- [3] (a) Y. Zhu, J. P. Malerich and V. H. Rawal, *Angew. Chem. Int. Ed.*, 2010, **49**, 153–156; *Angew. Chem.* **2010**, *122*, 157–160. (b) W. Yang and D. M. Du, *Org. Lett.*, 2010, **12**, 5450–5453. (c) W. Yang and D. M. Du, *Adv. Synth. Catal.*, 2011, **353**, 1241–1246. (d) B. Vakulya, S. Varga, A. Csampai and T. Soós, *Org. Lett.*, 2005, **7**, 1967–1969.

8. Copies of  $^1\text{H}$ ,  $^{13}\text{C}$  and  $^{19}\text{F}$  NMR spectra of new compounds

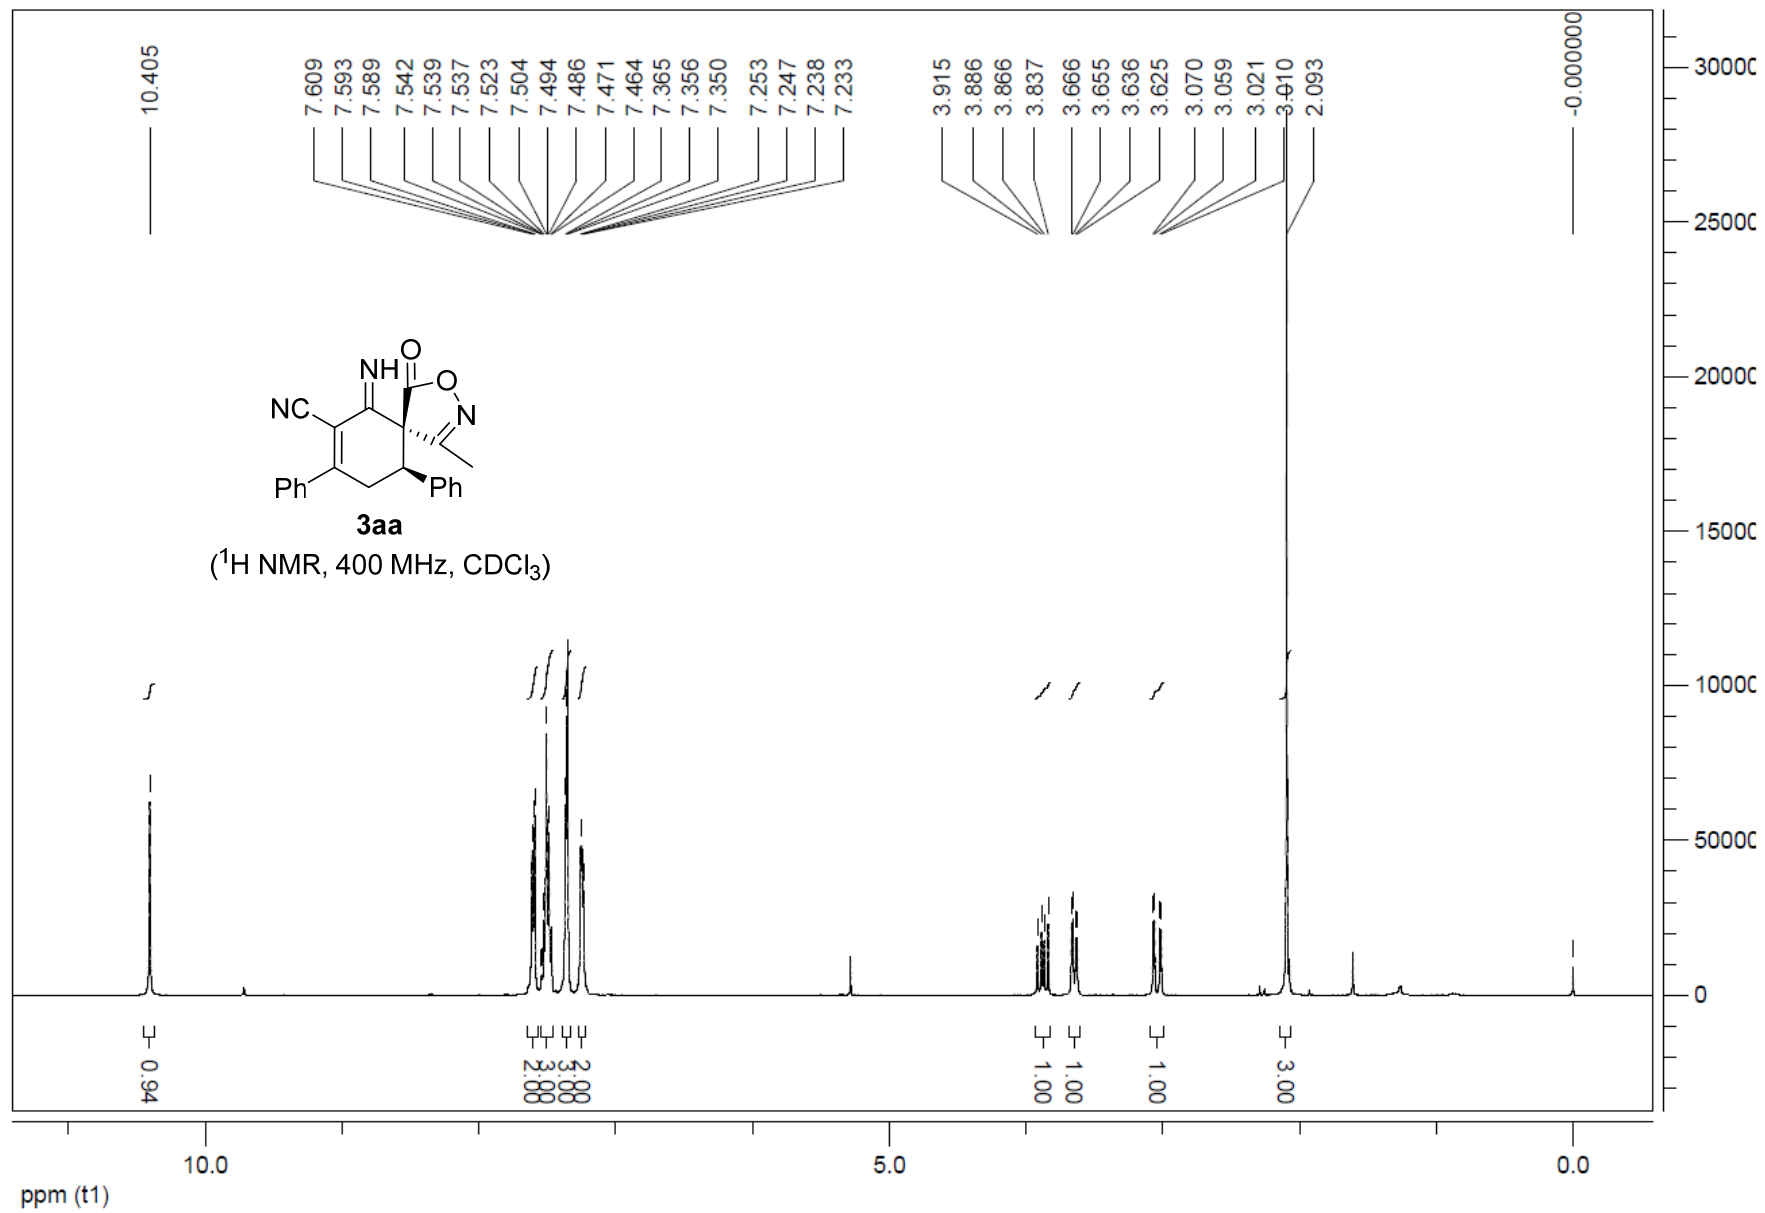

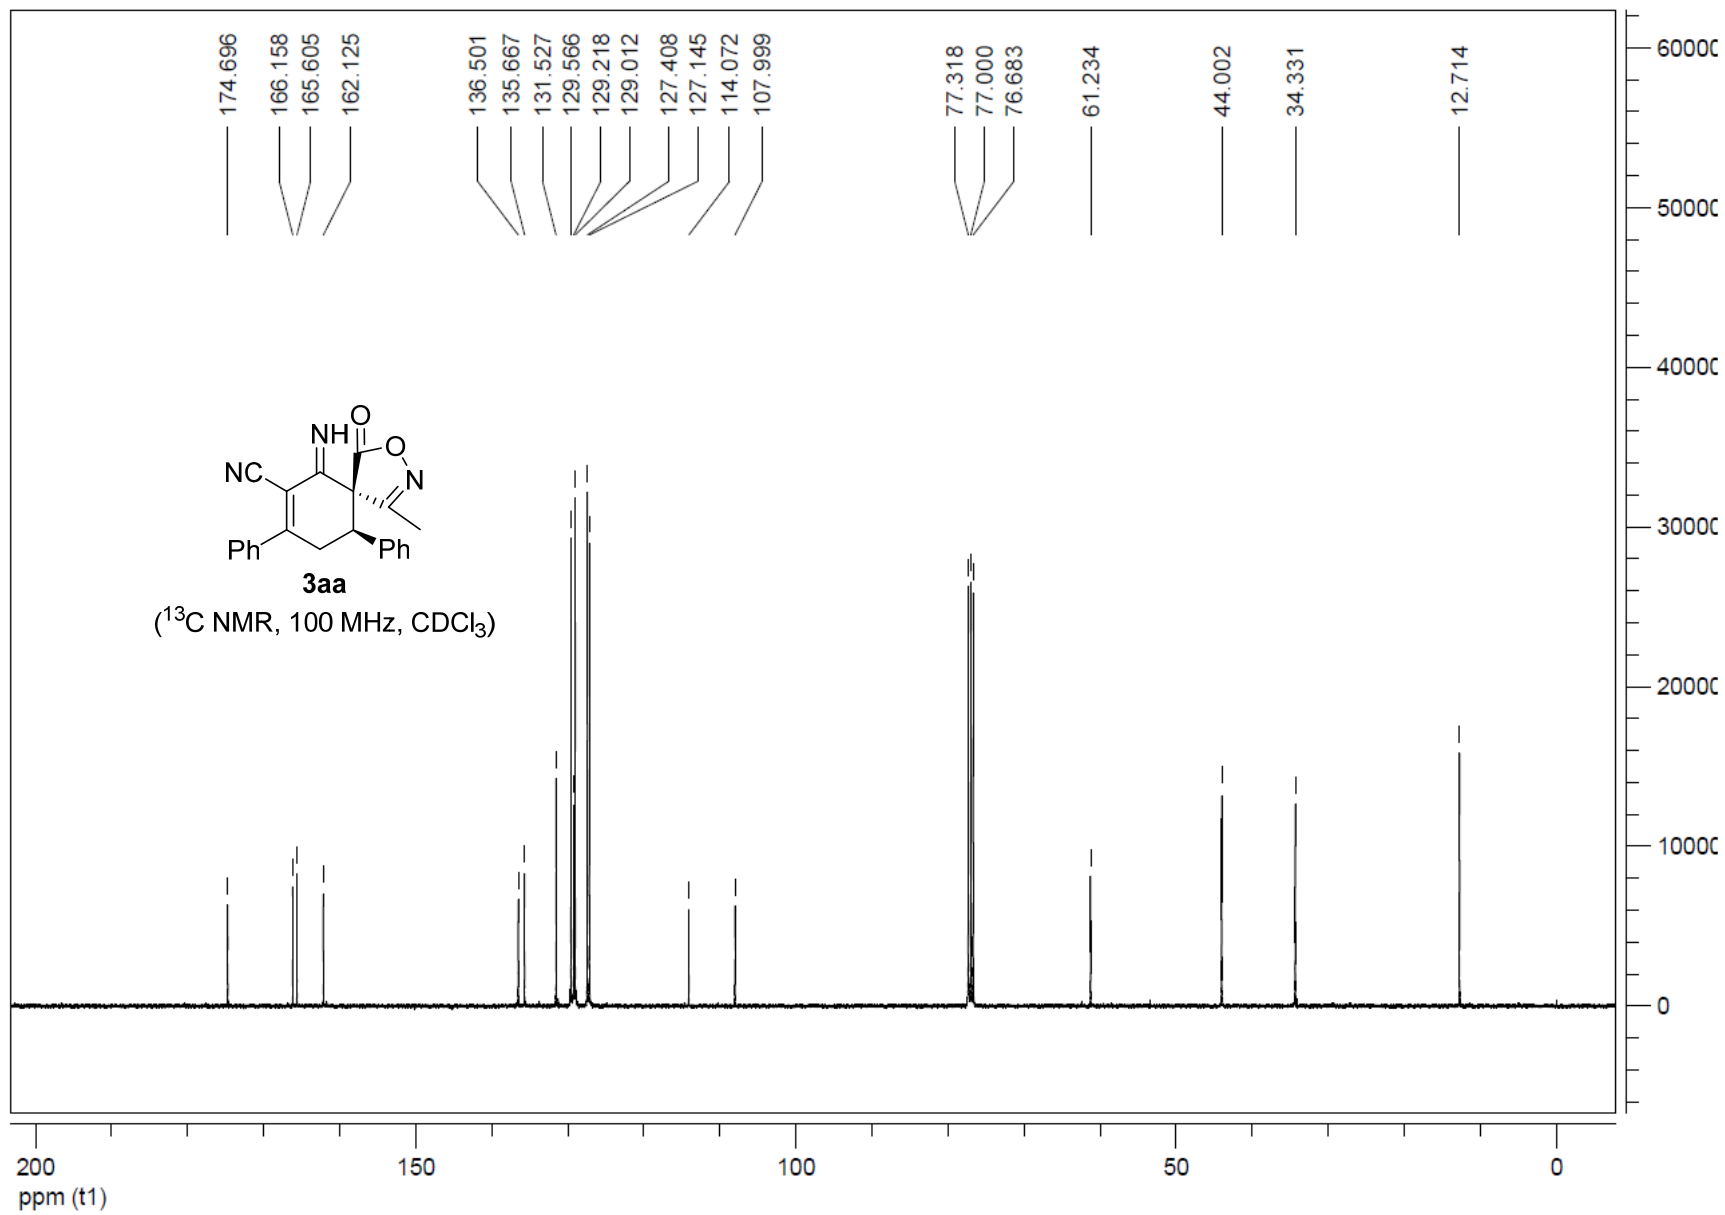

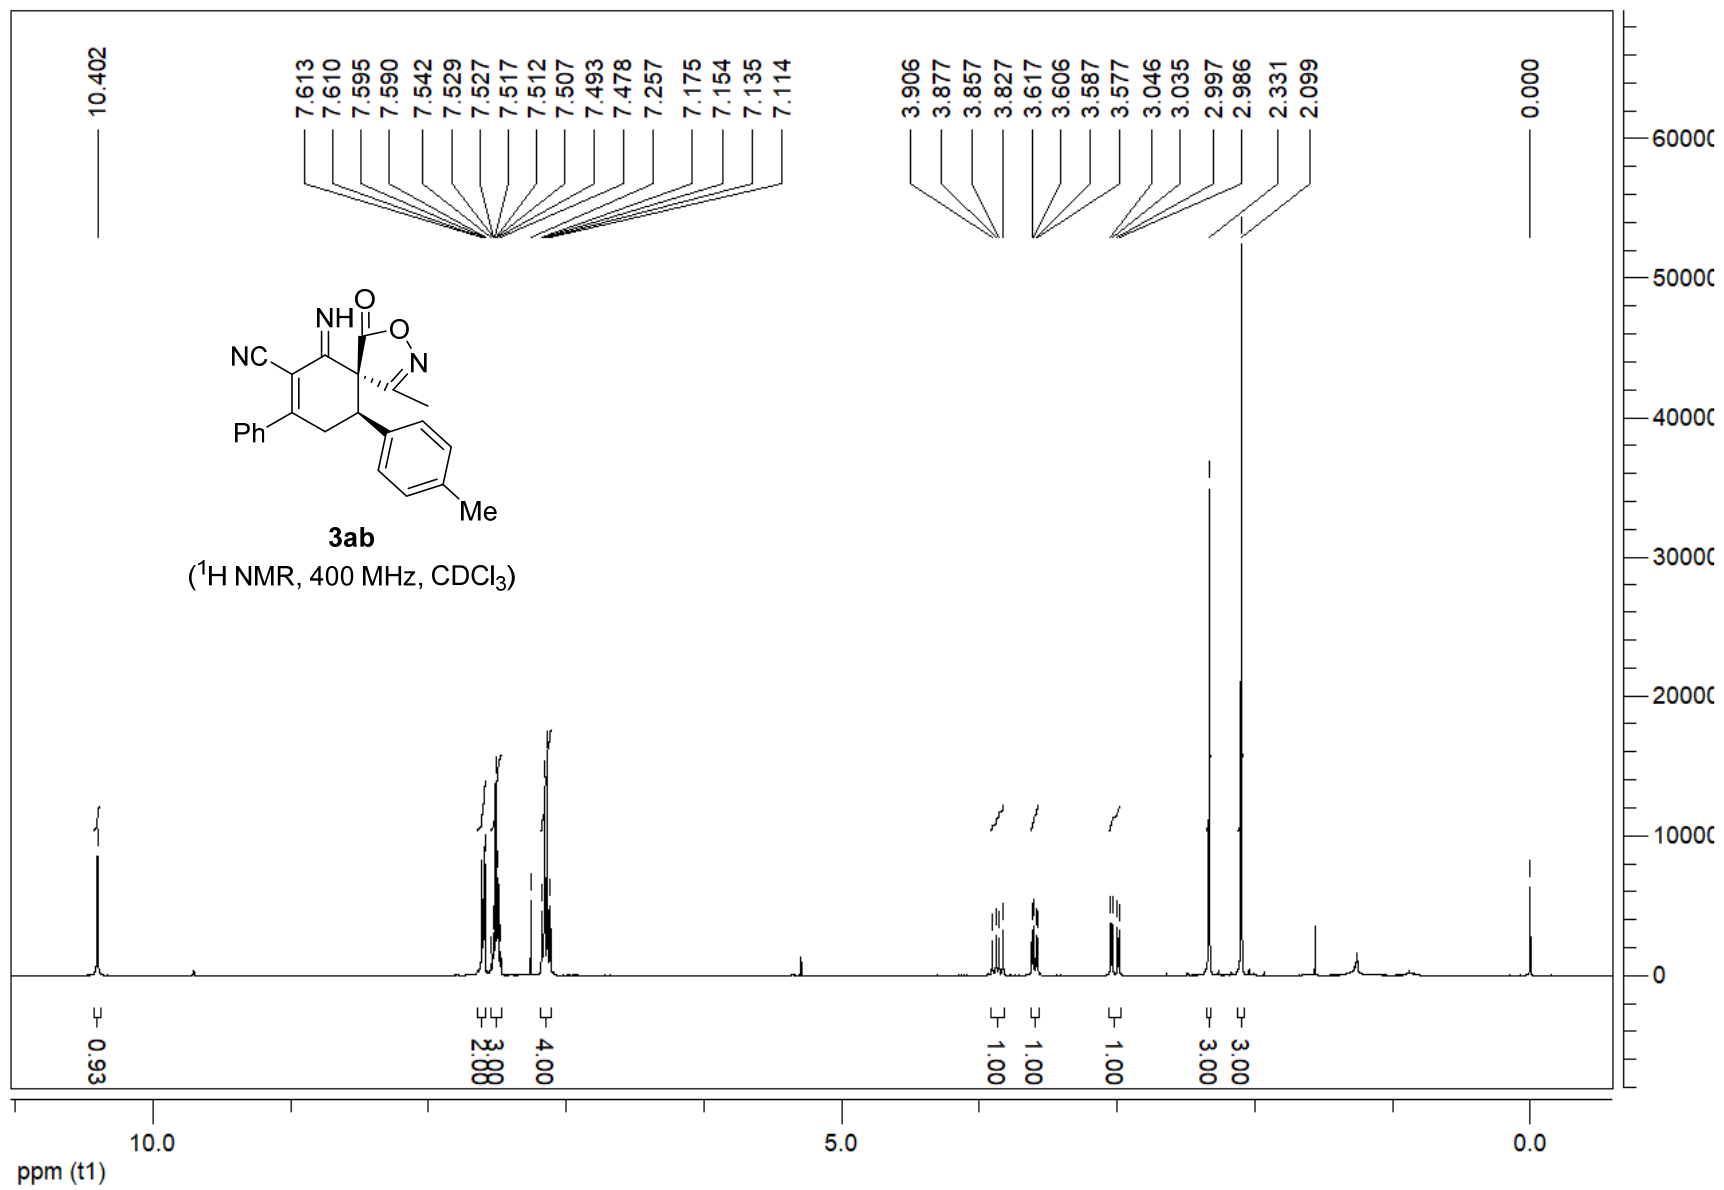

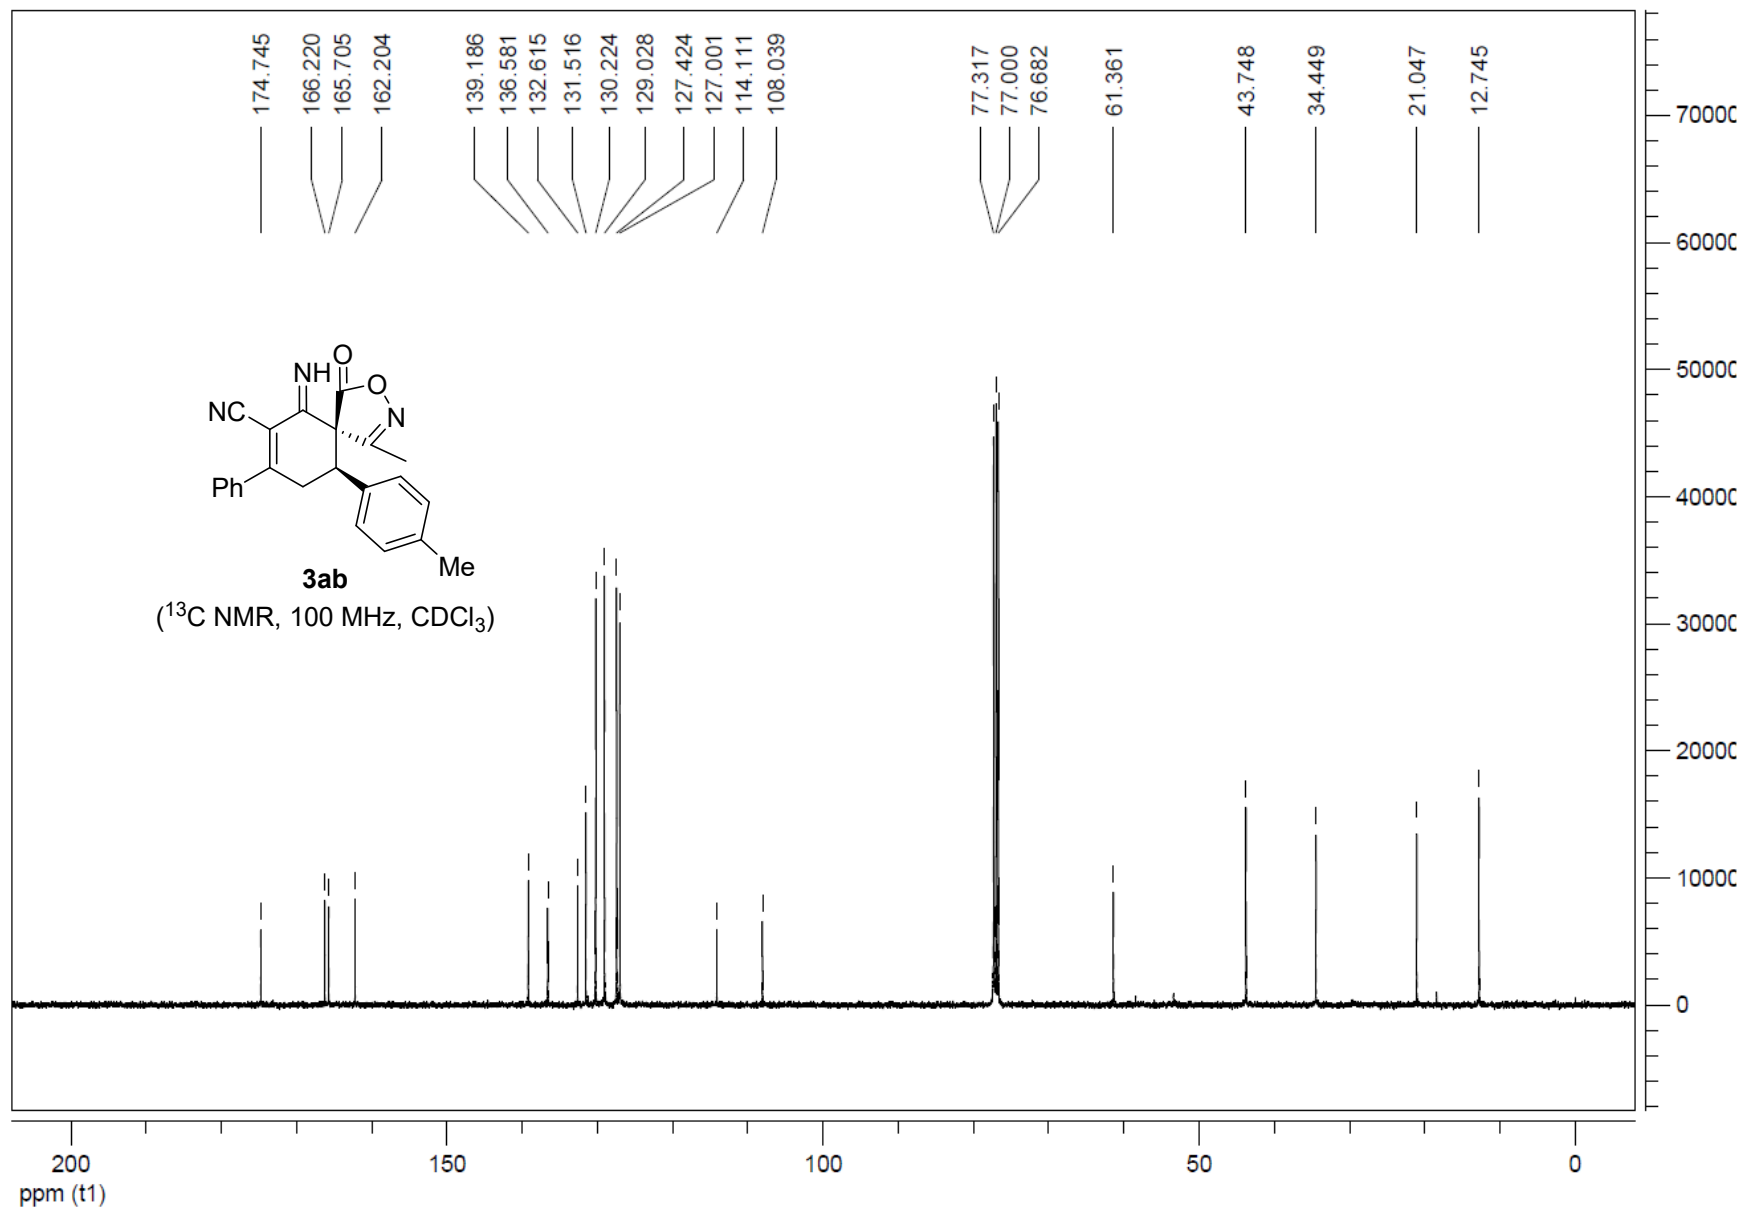



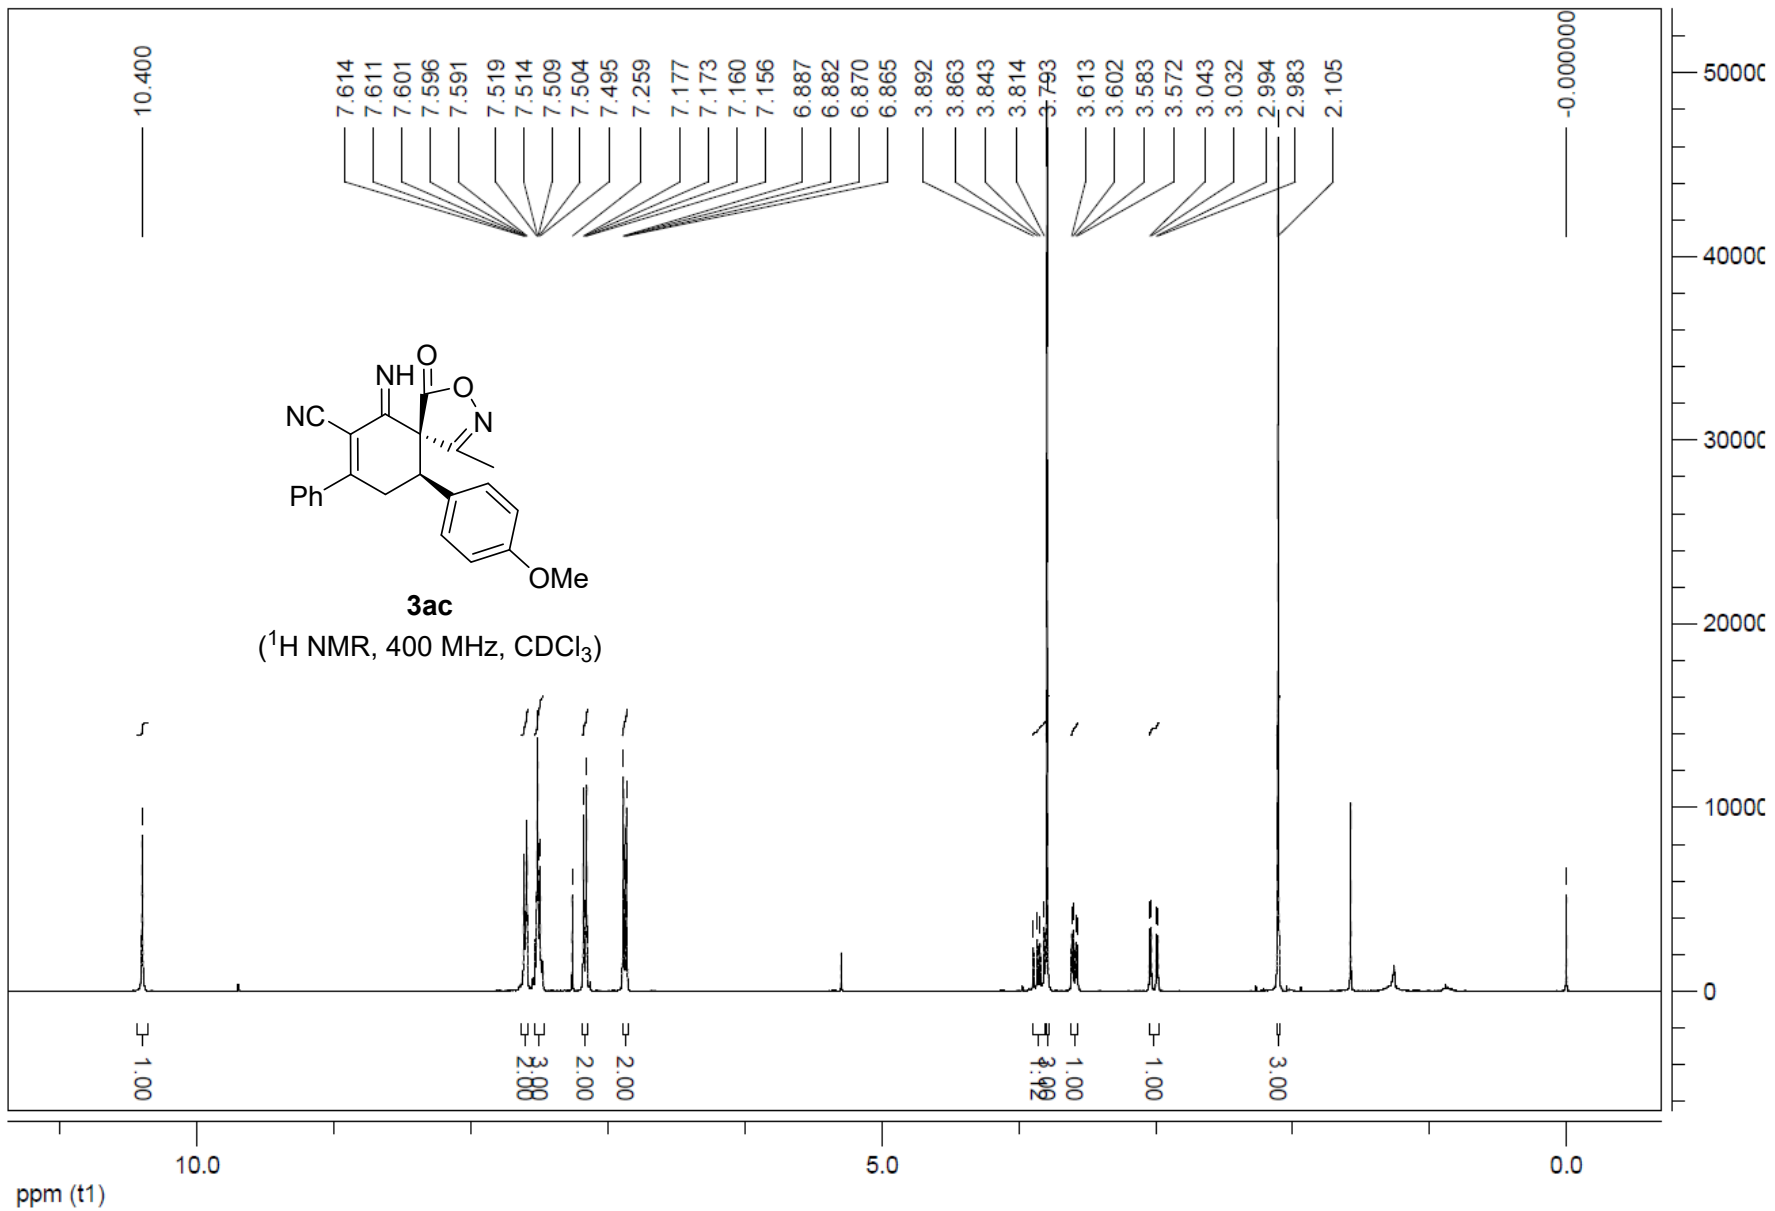

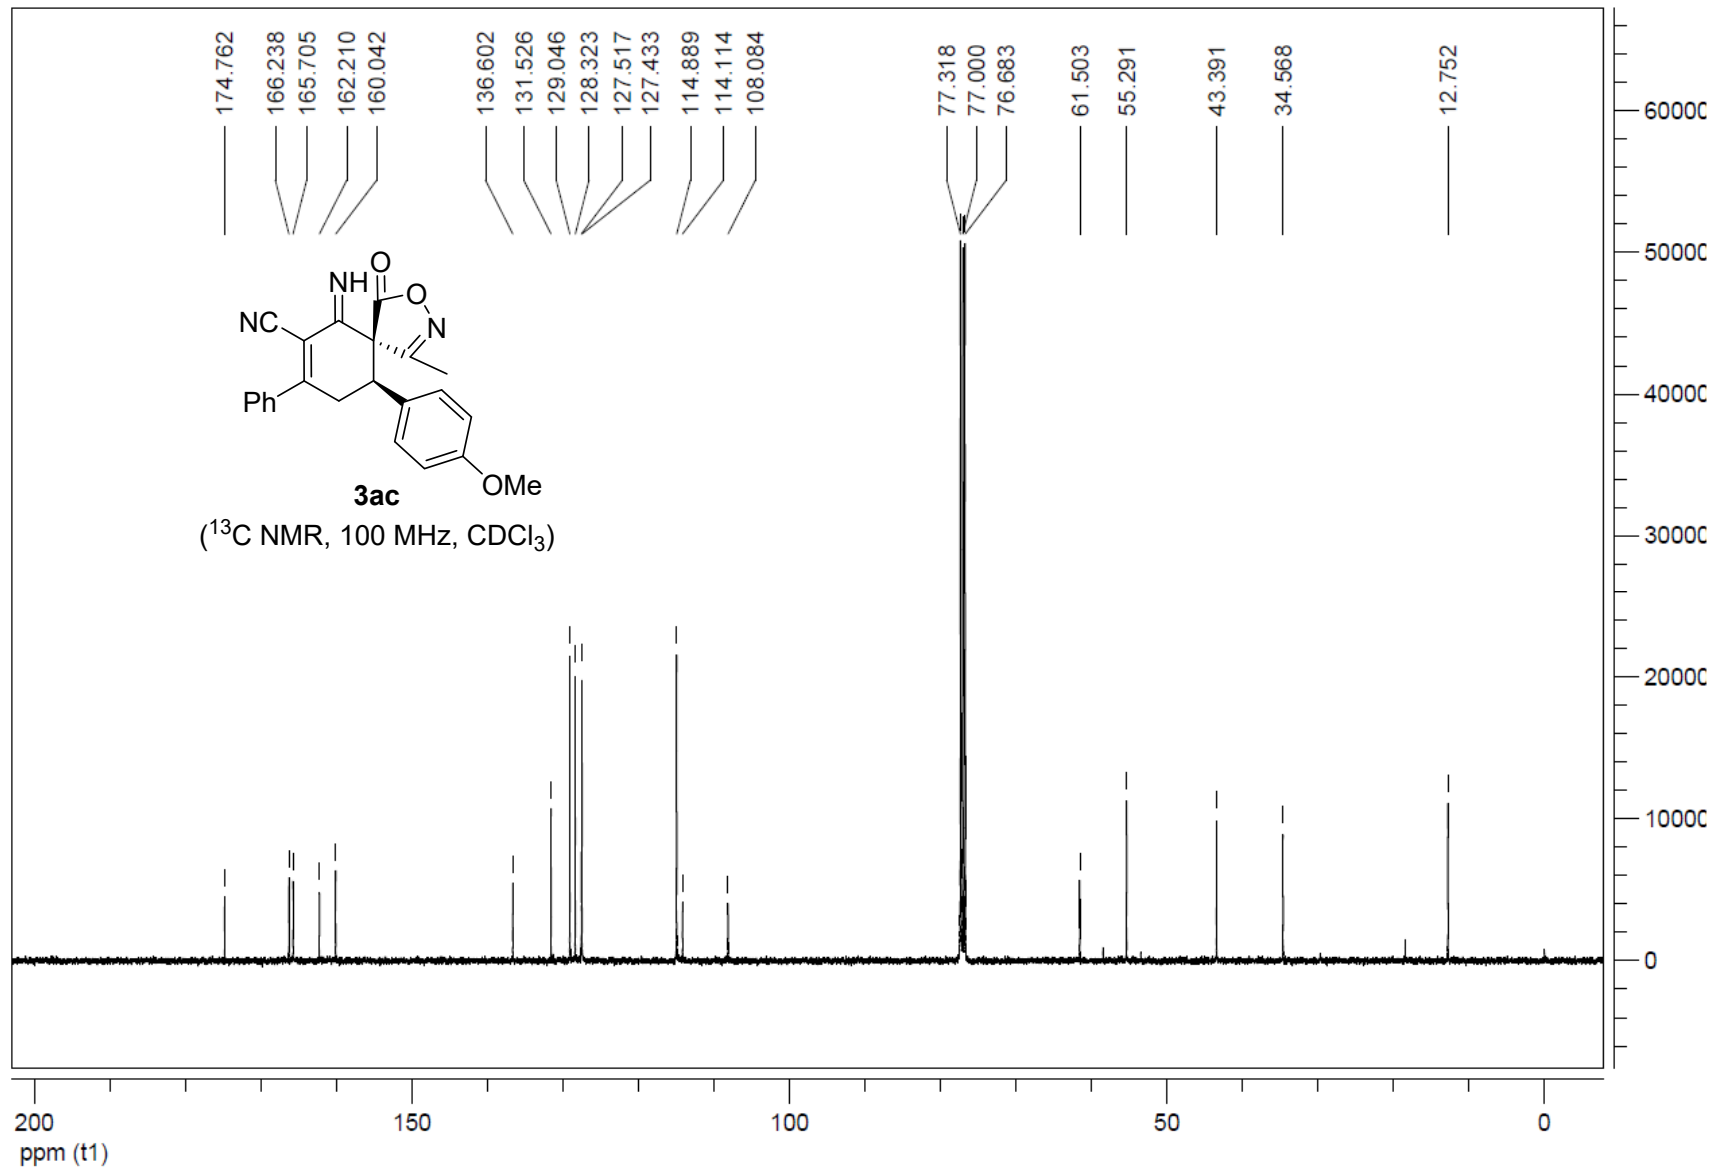

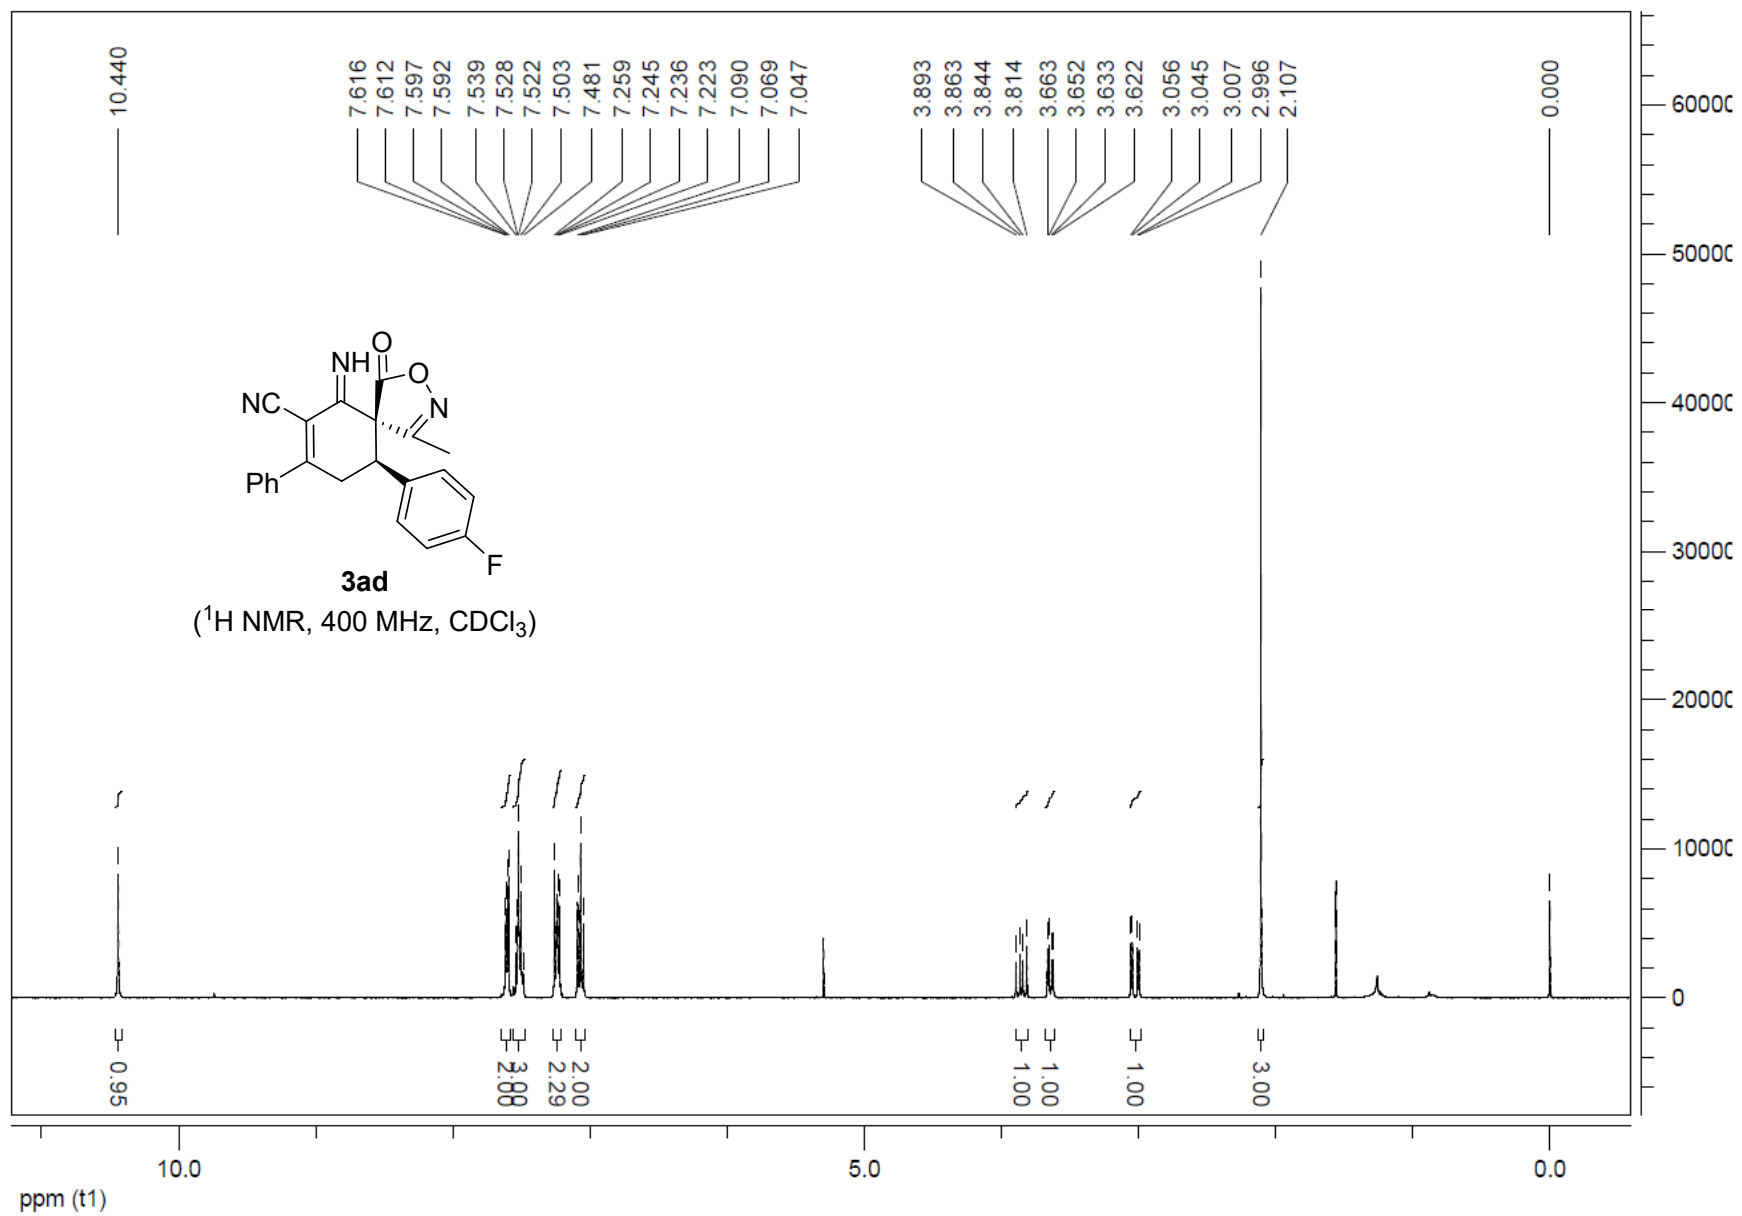

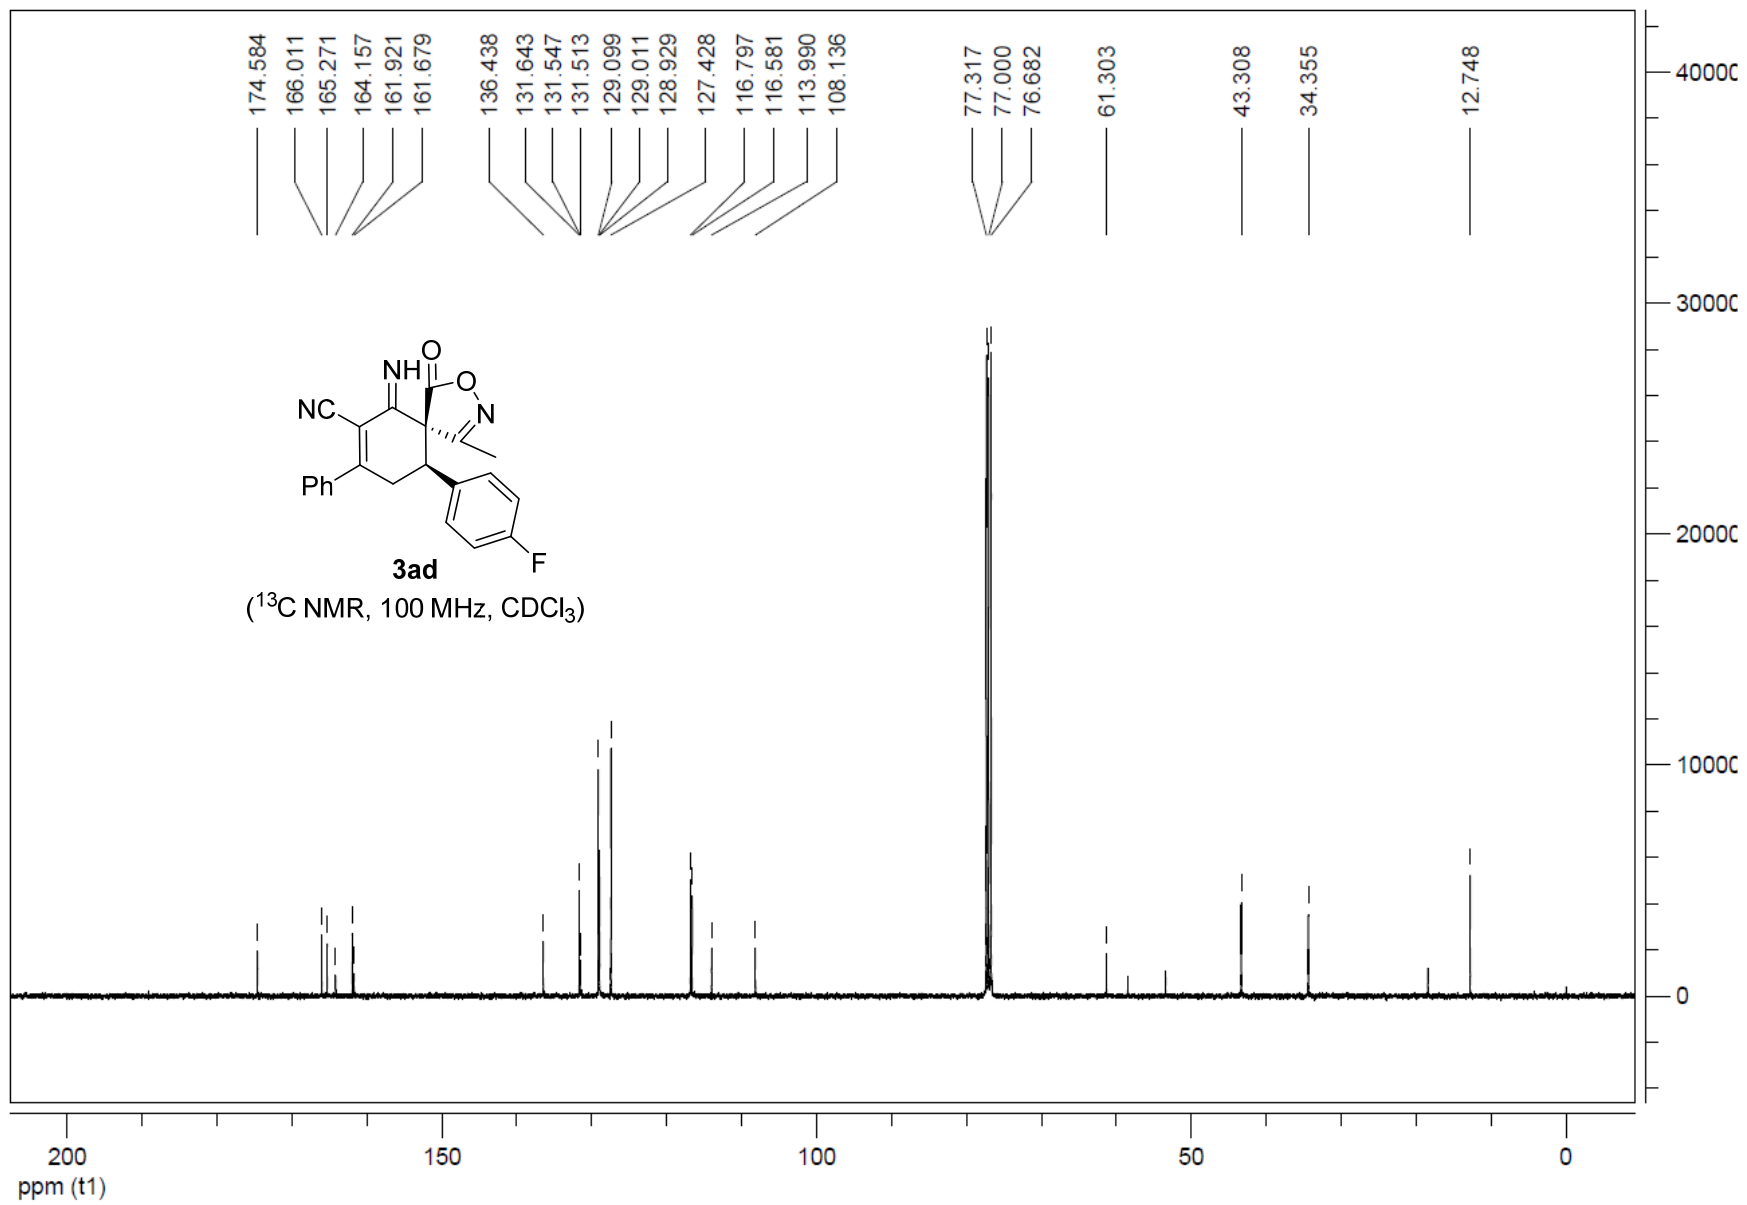

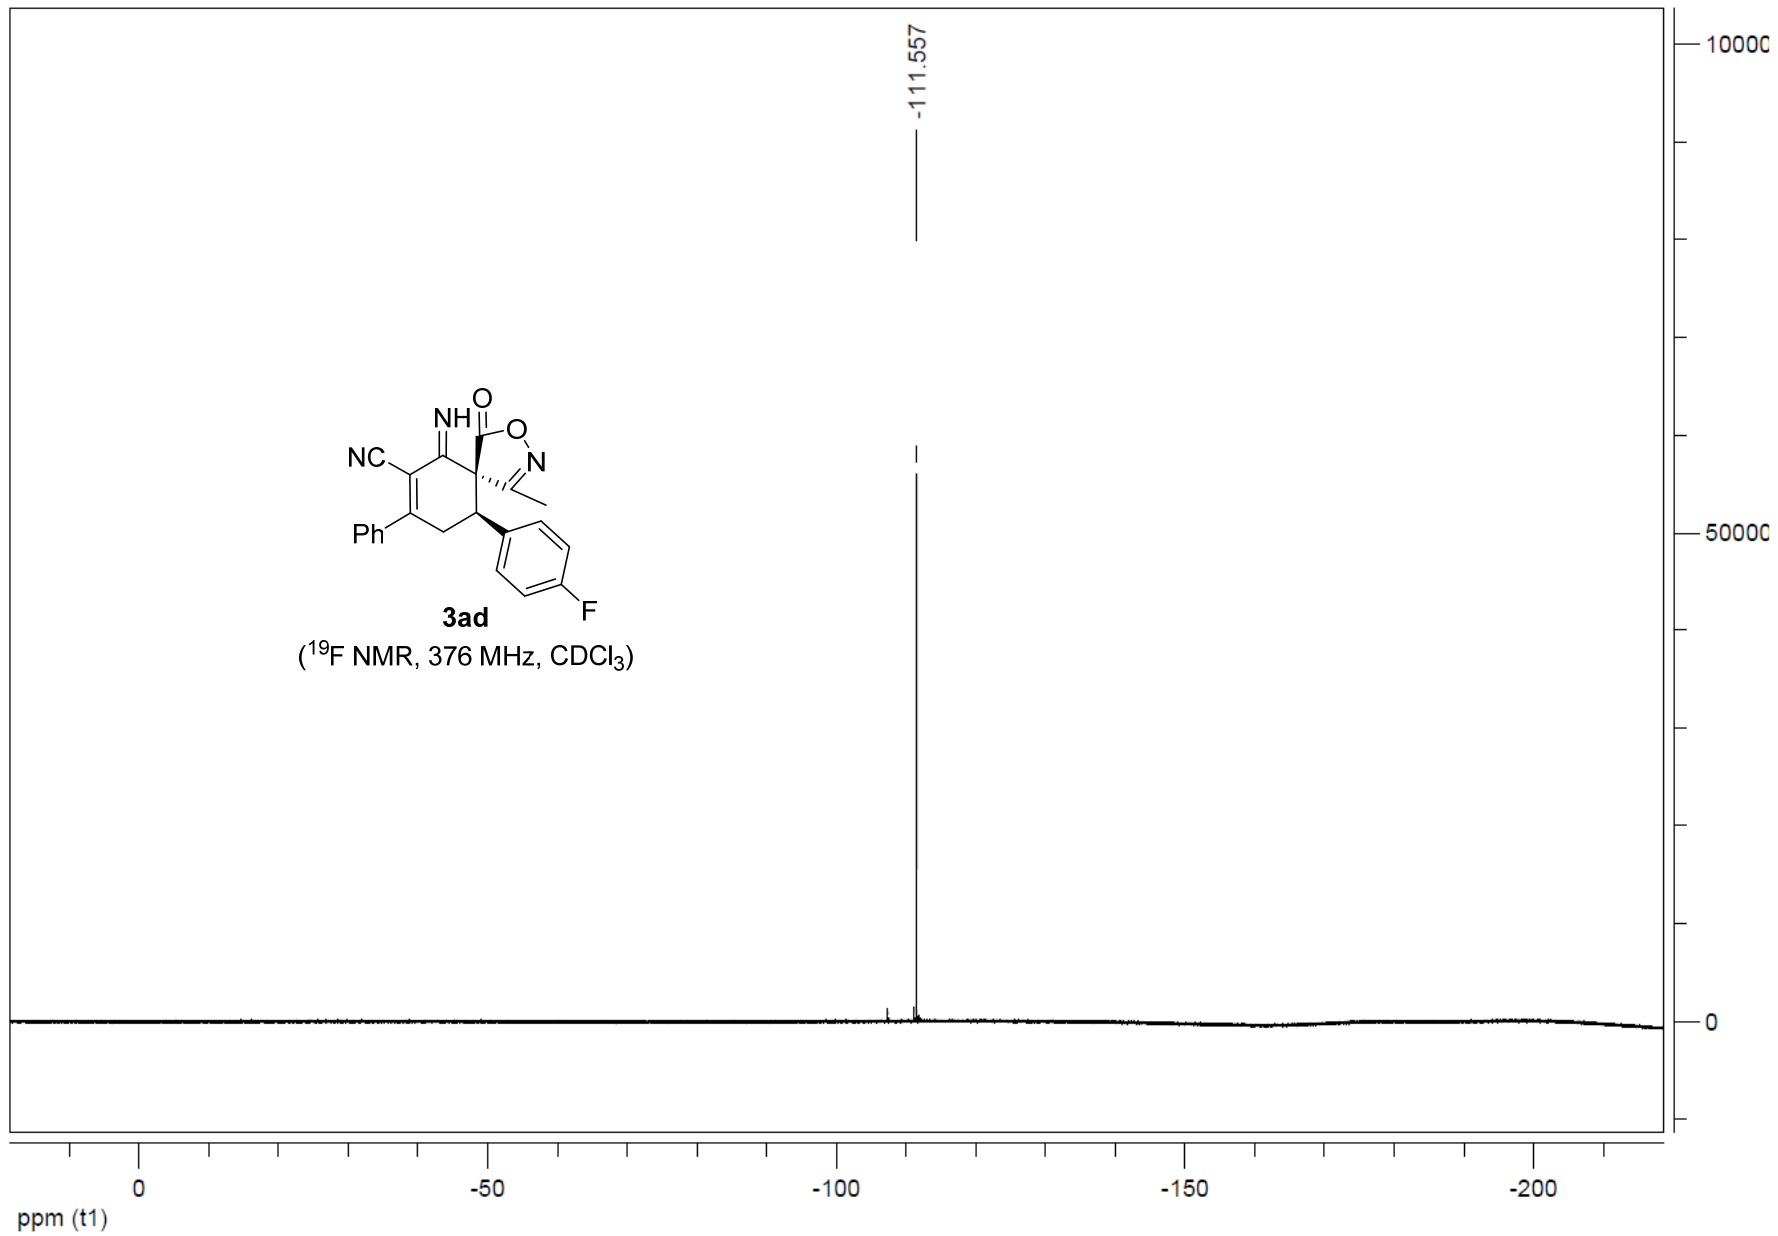

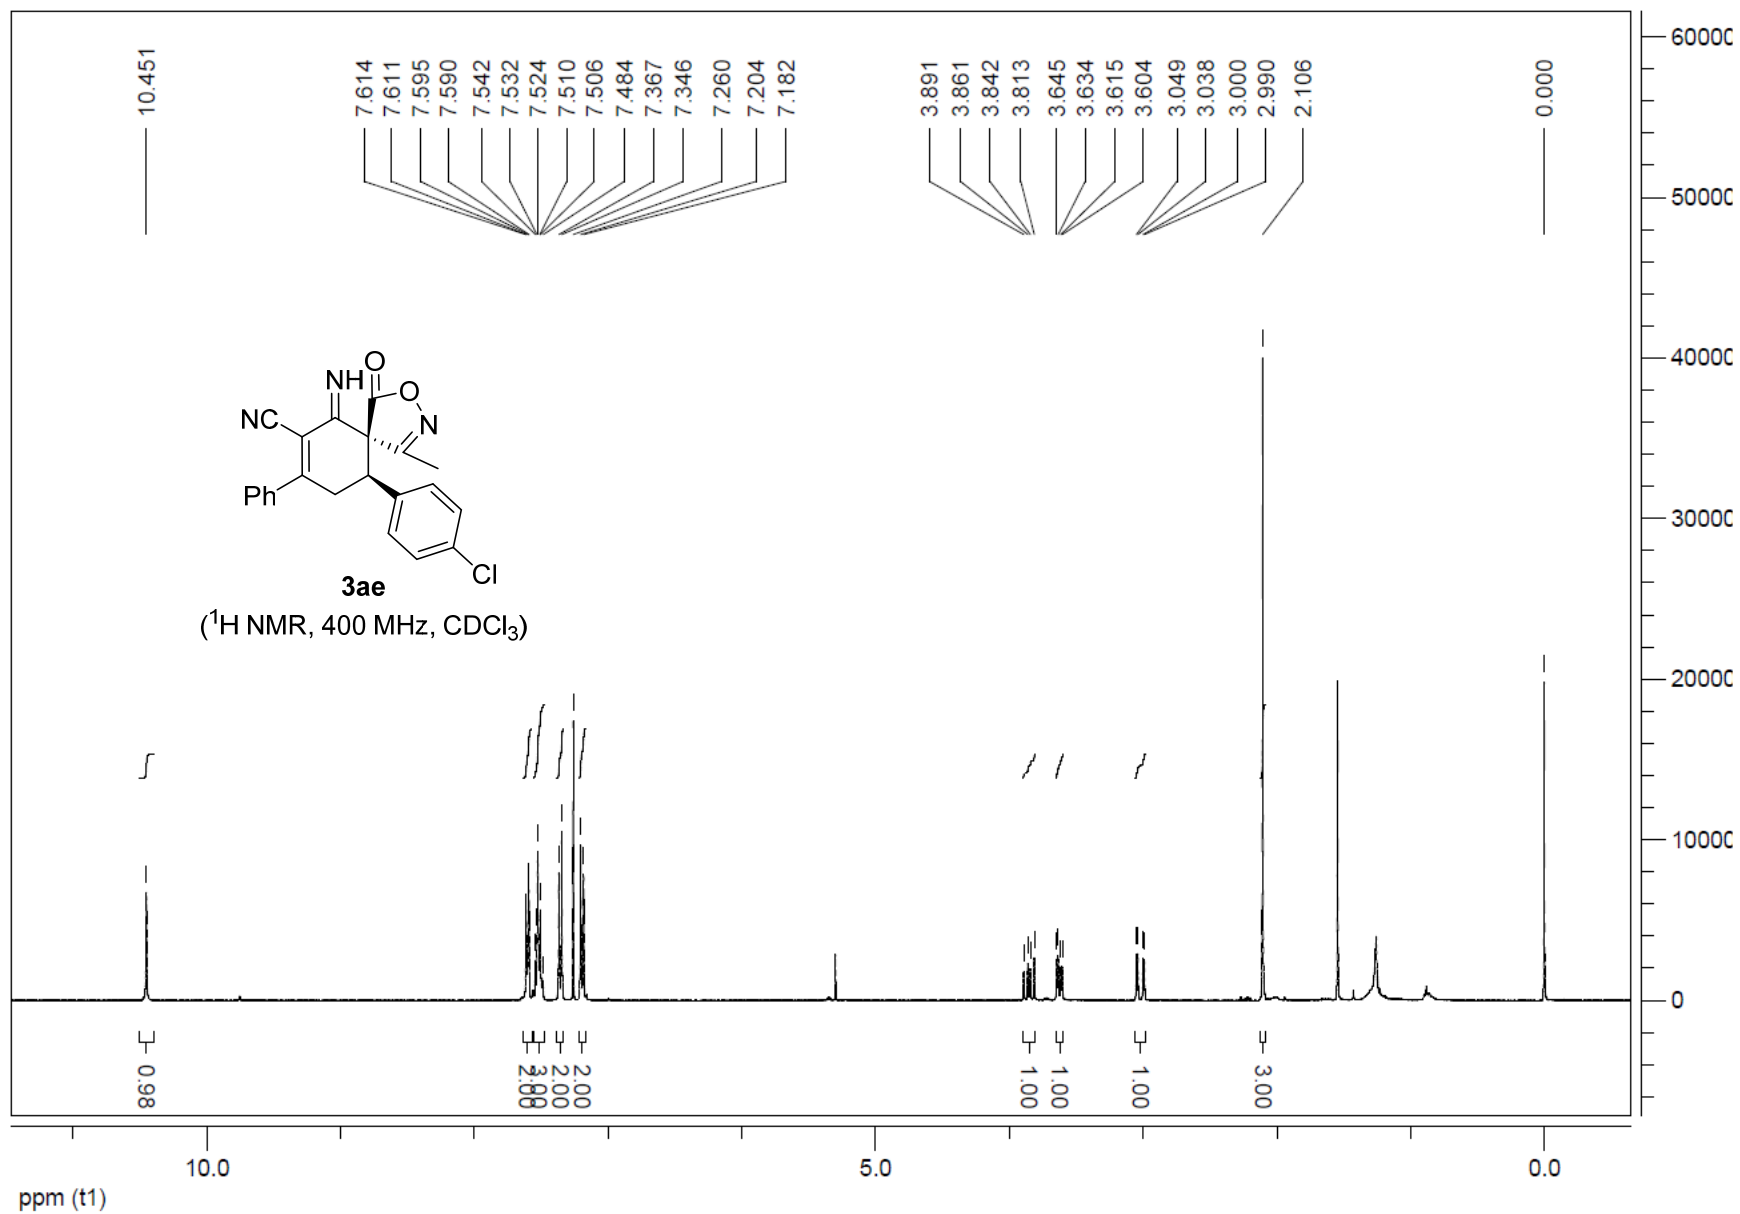

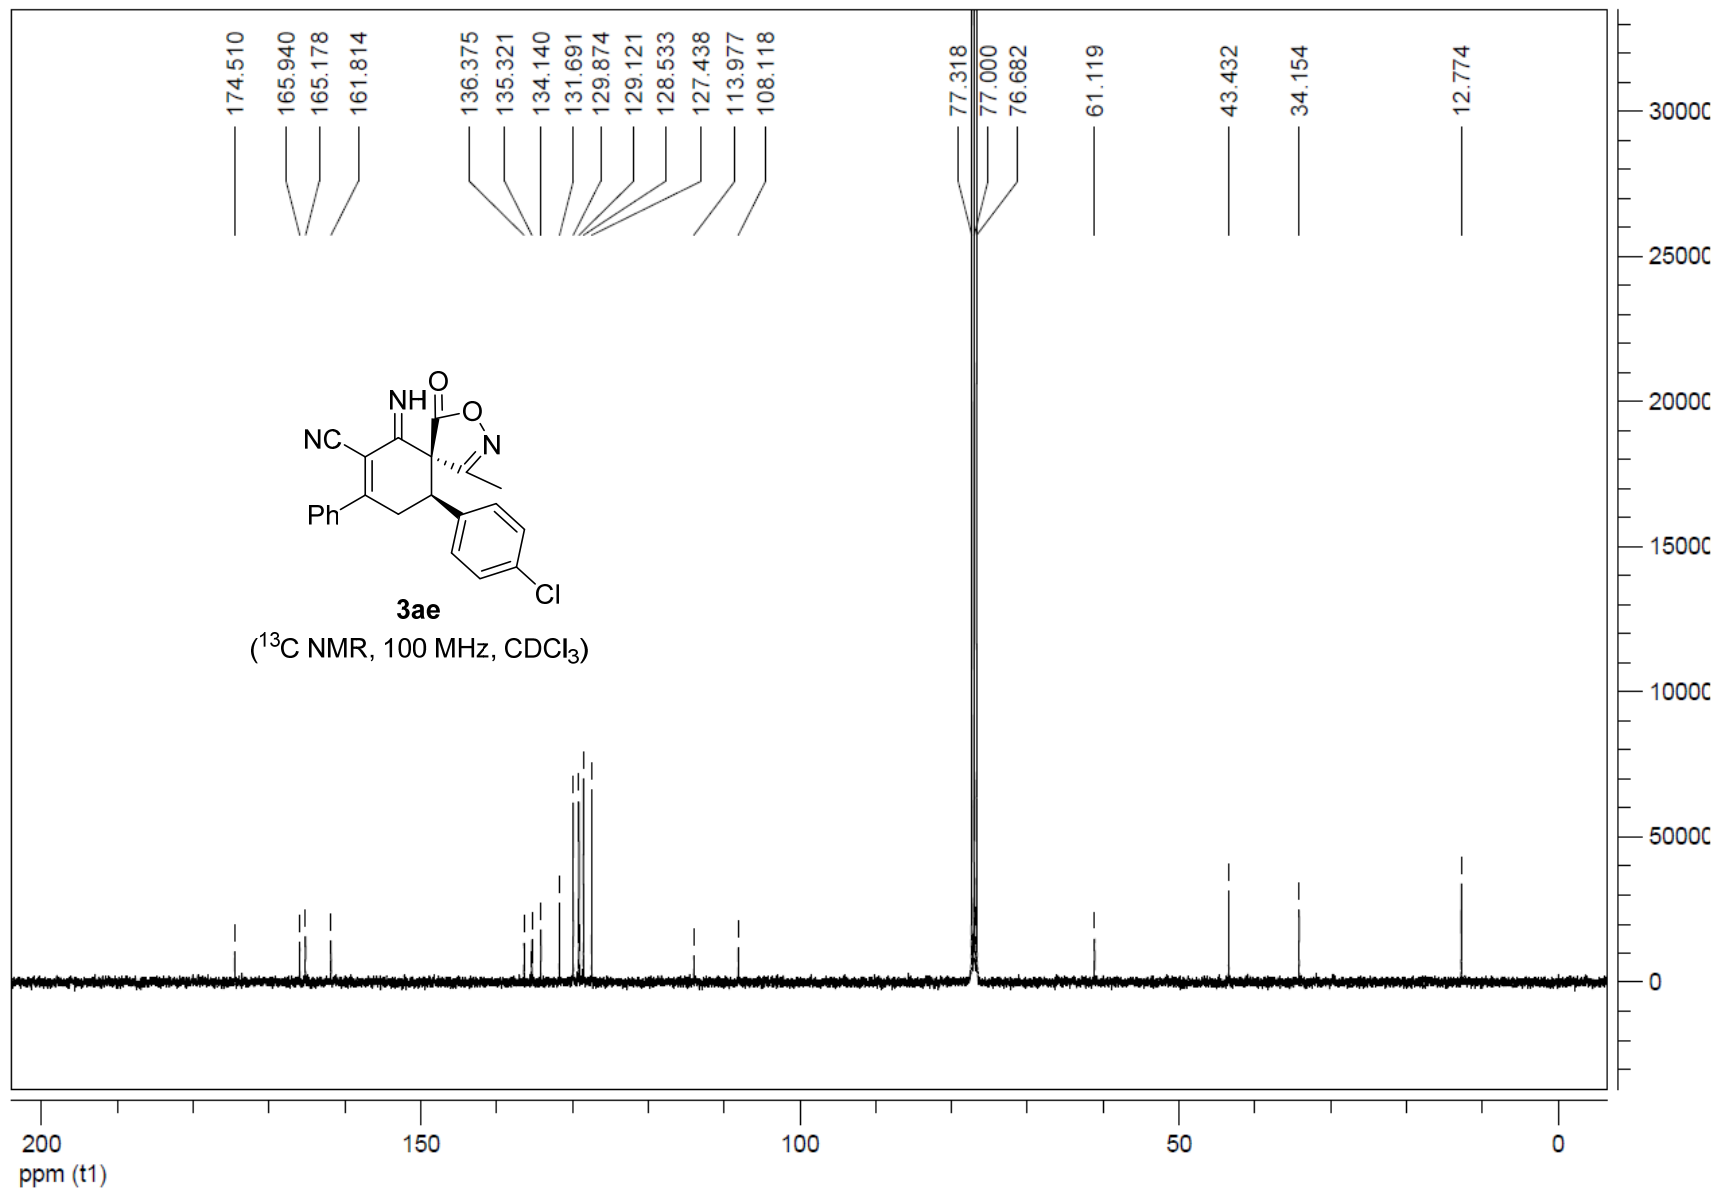

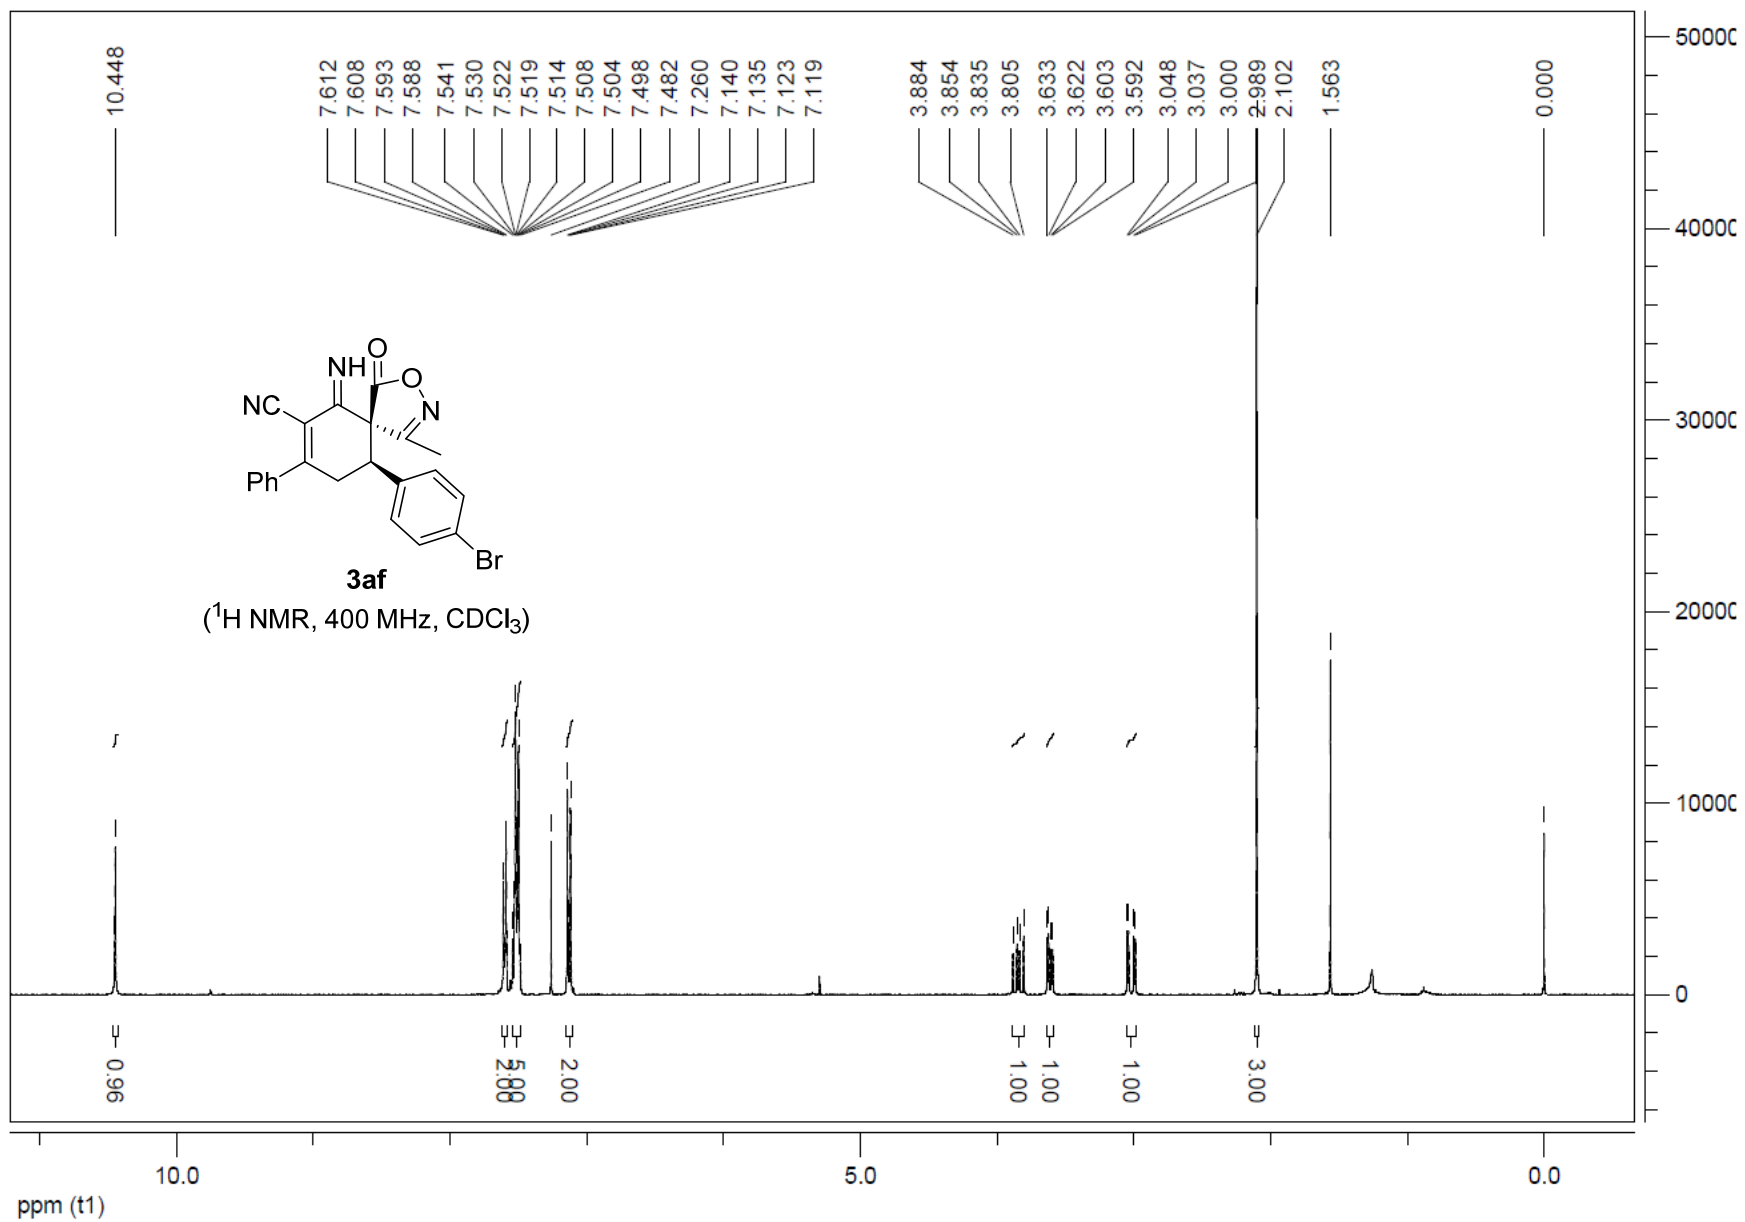



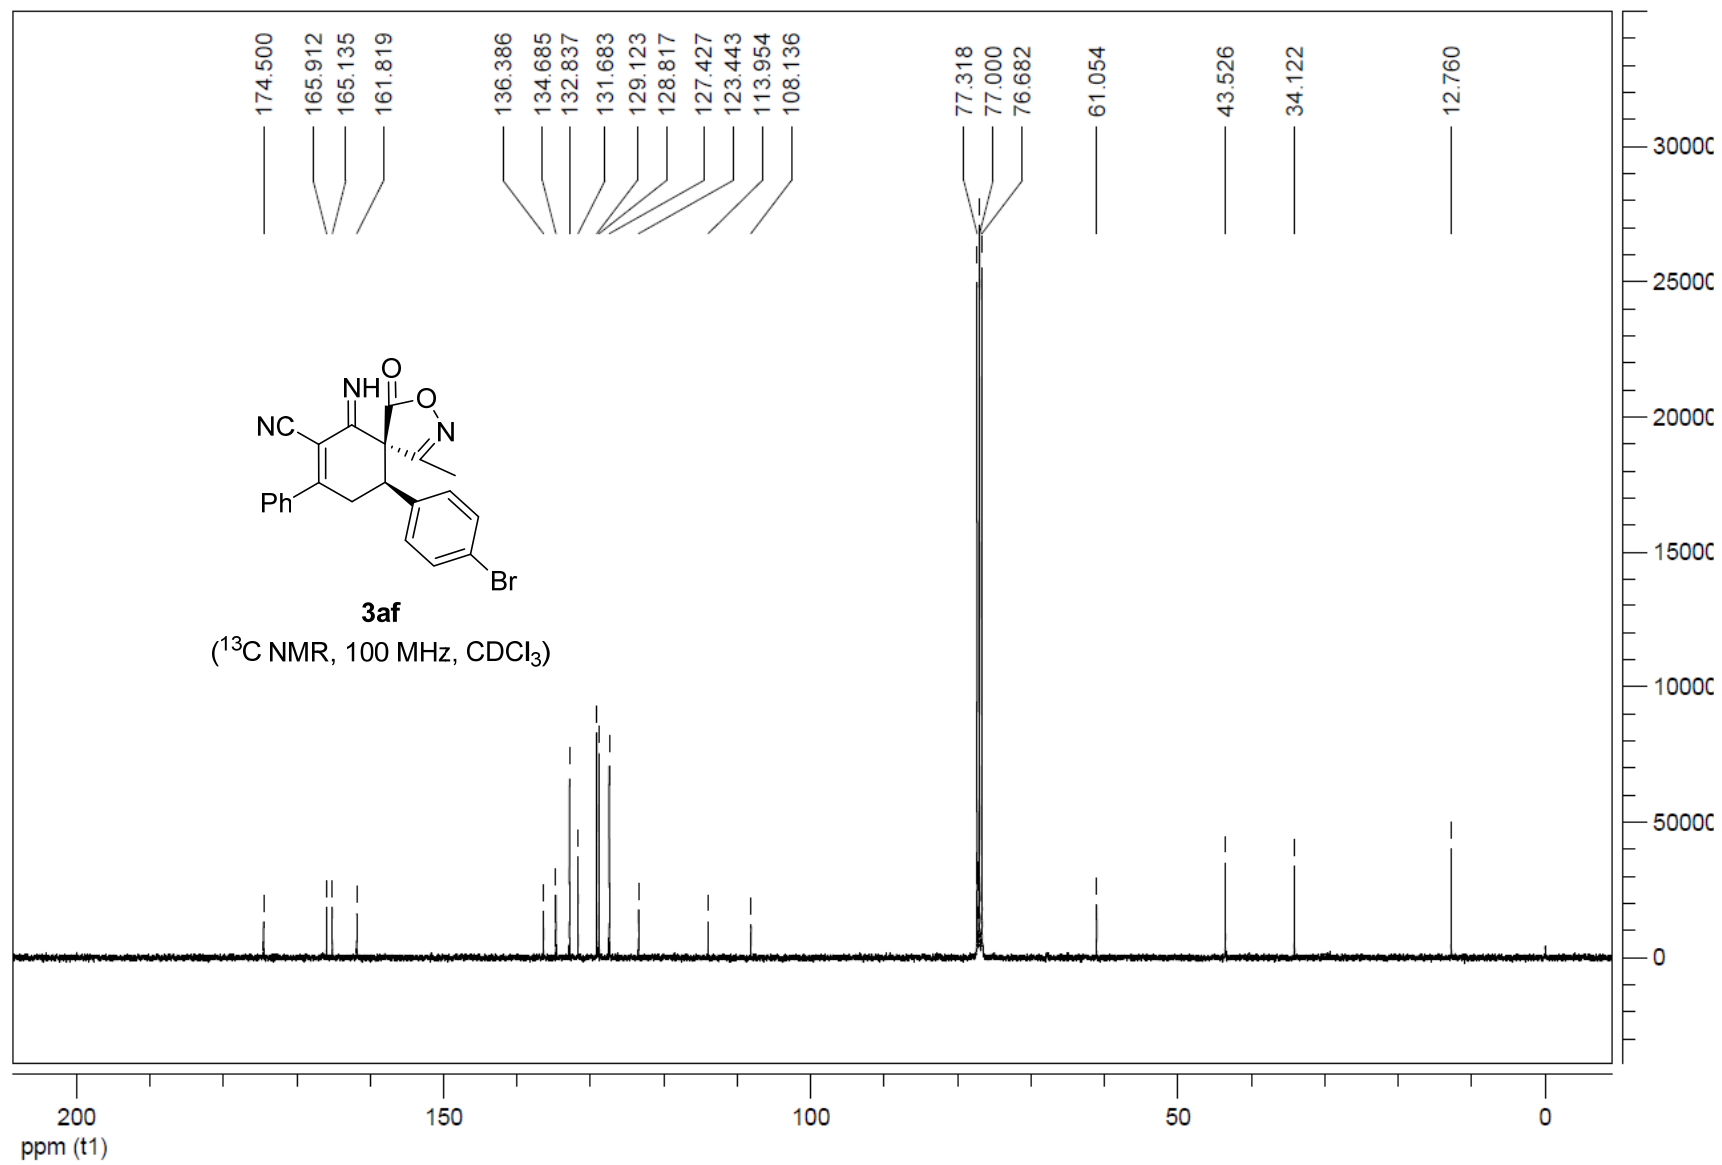

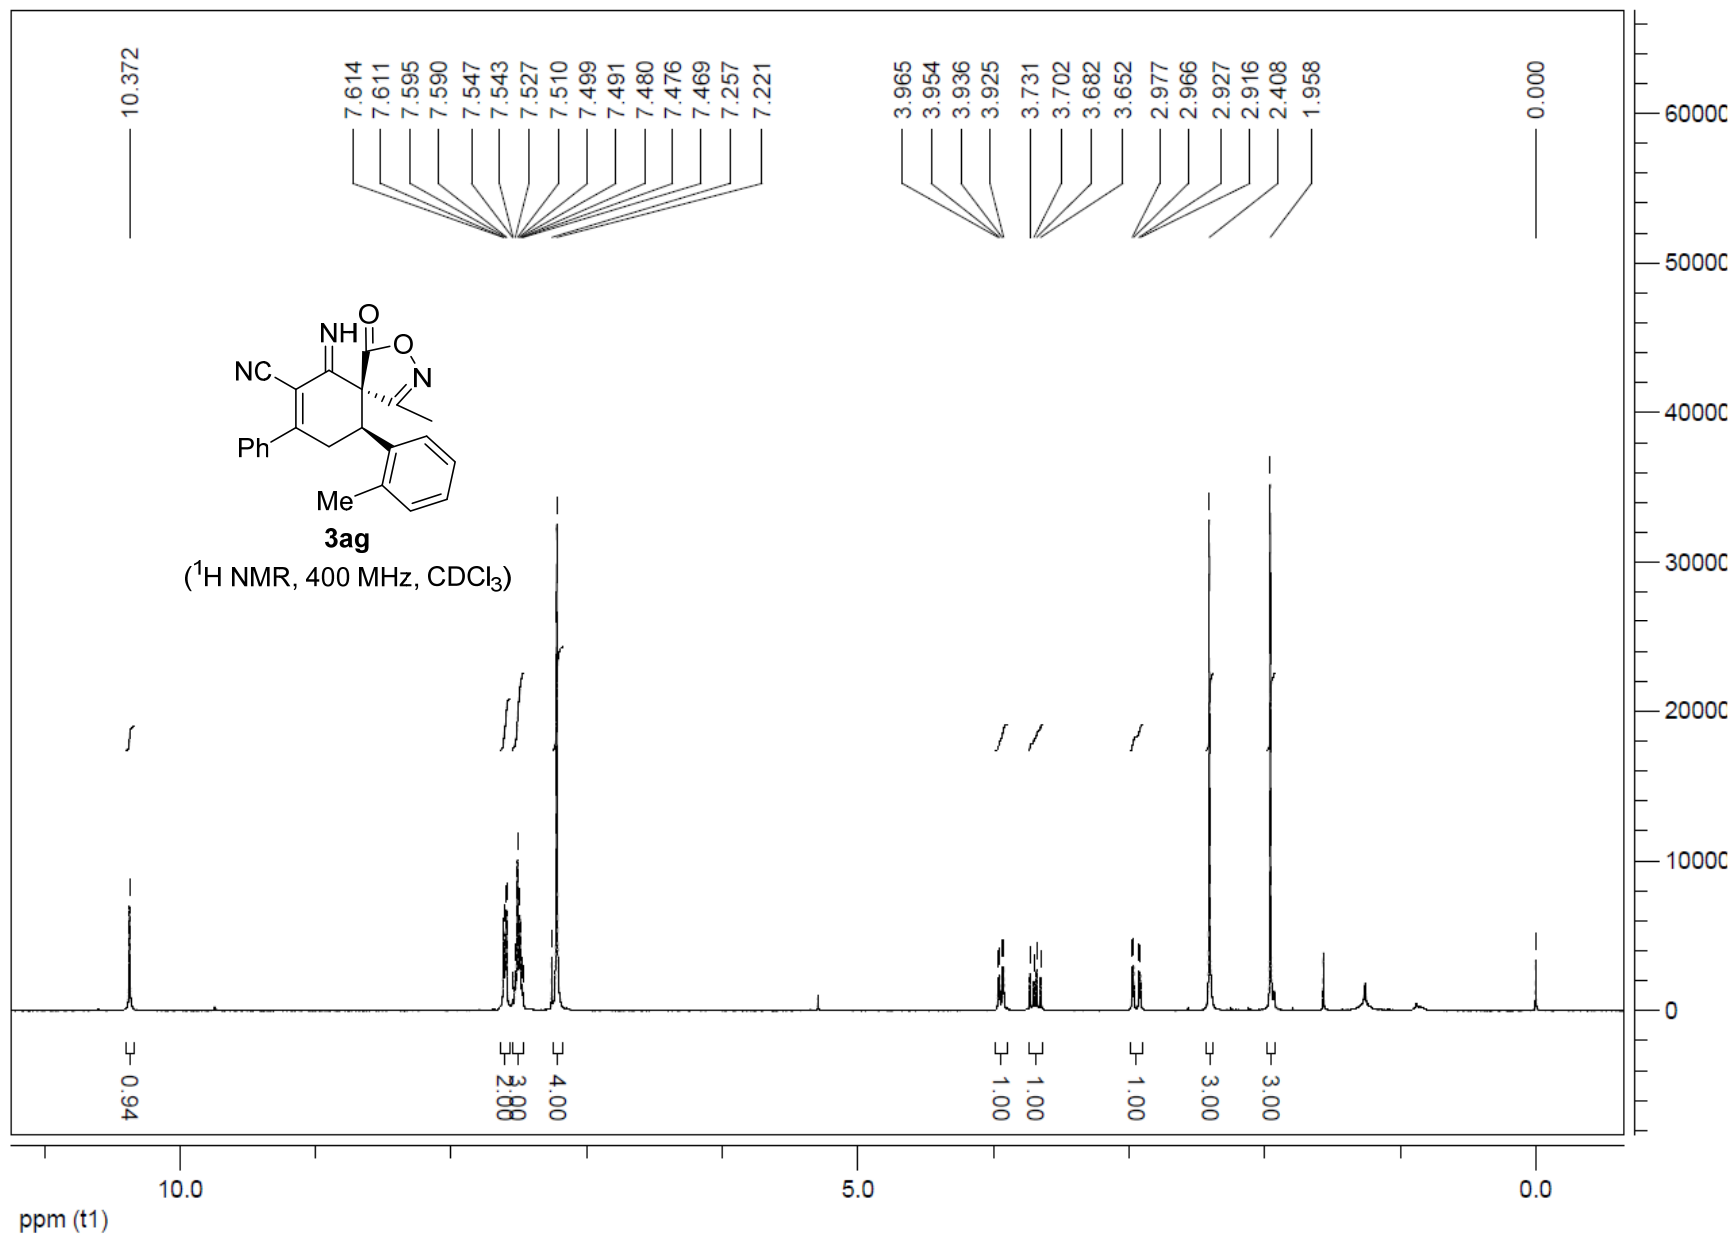

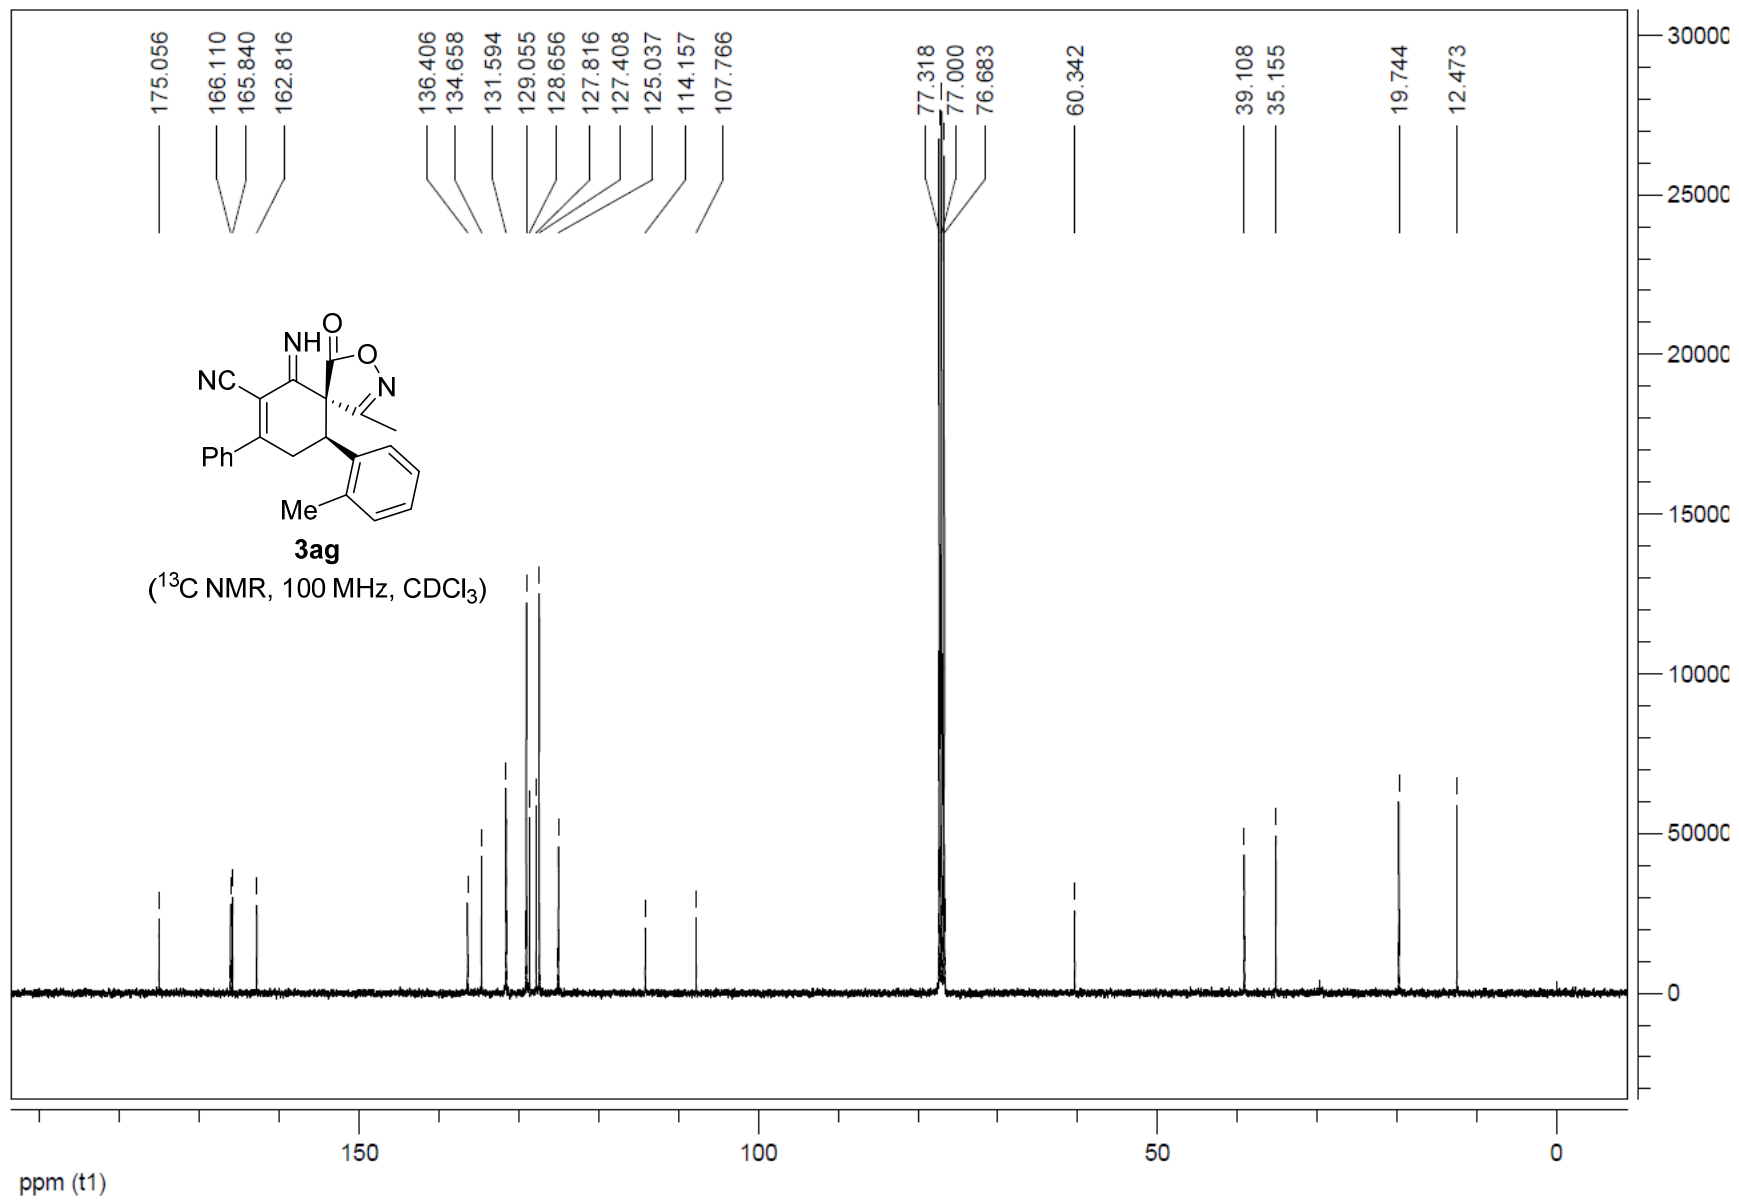

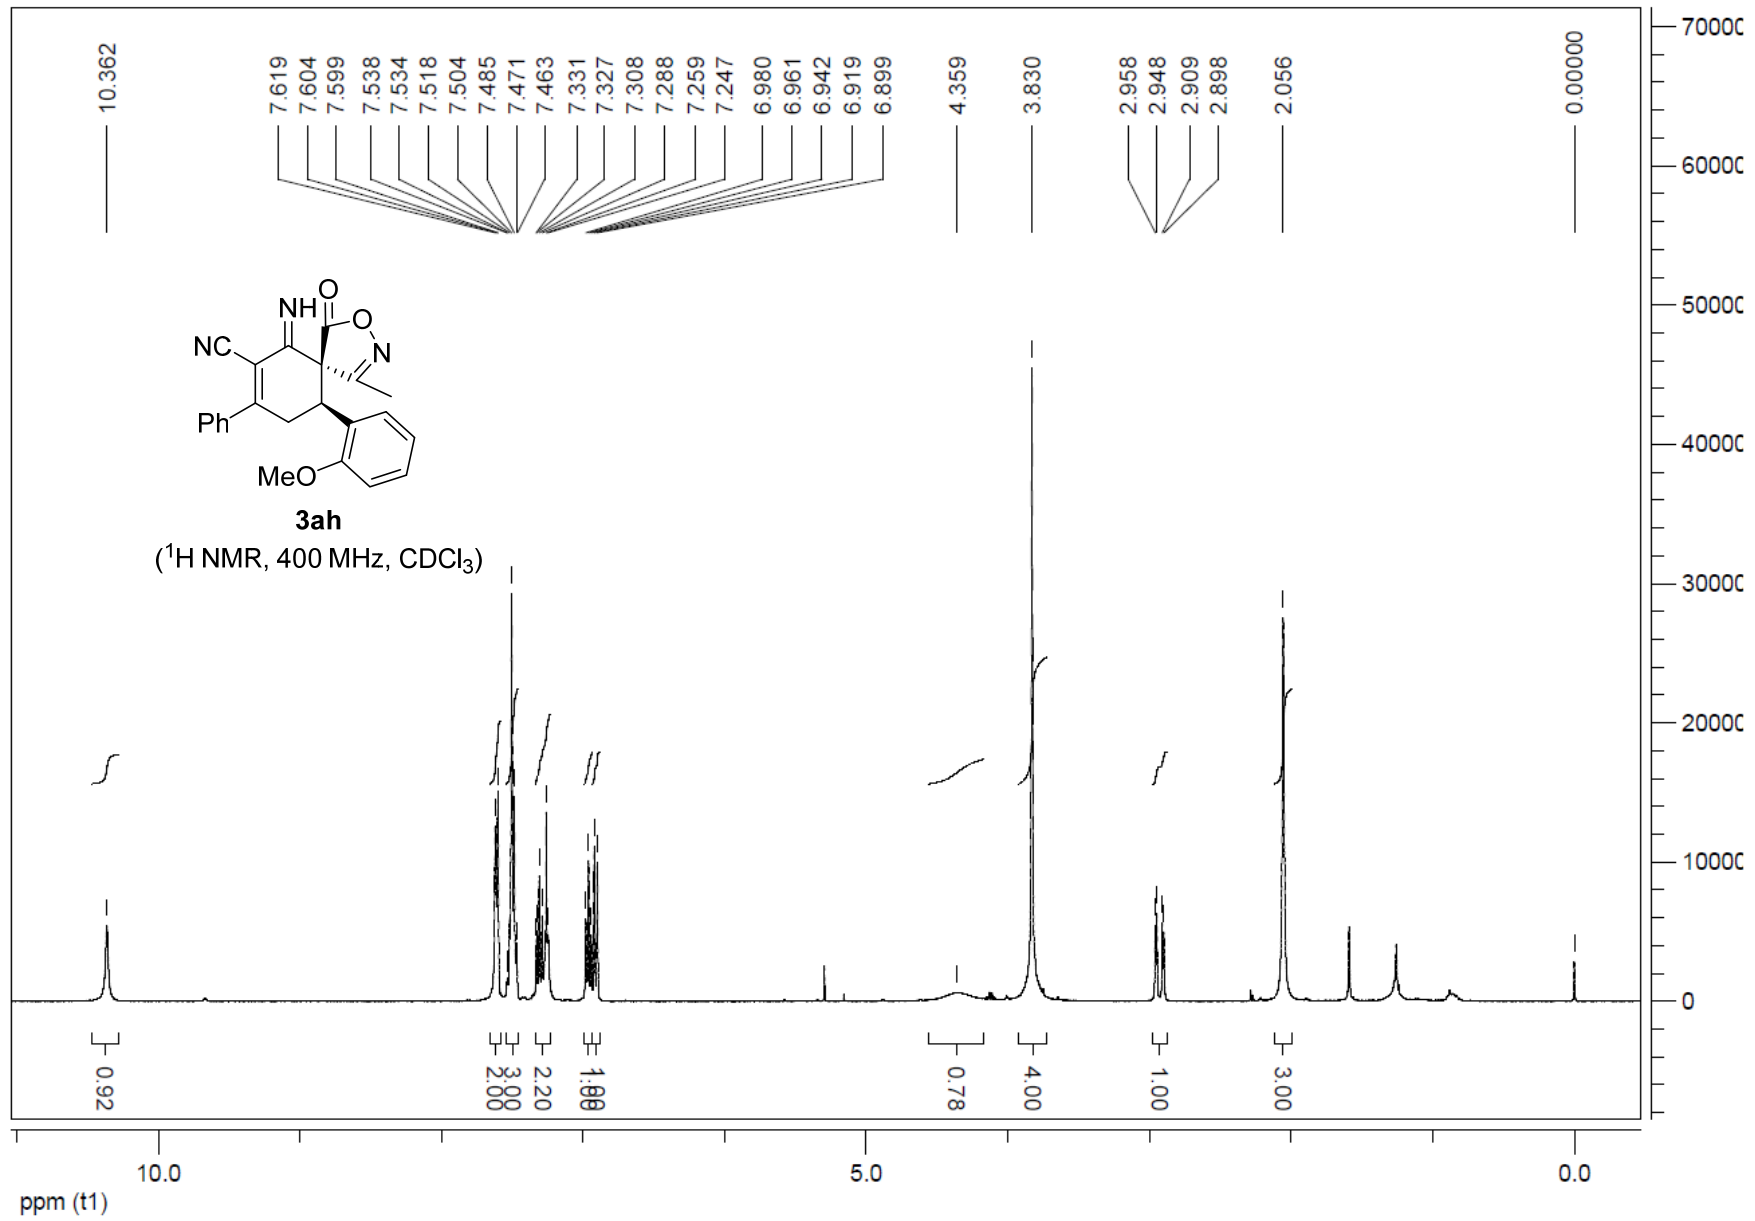

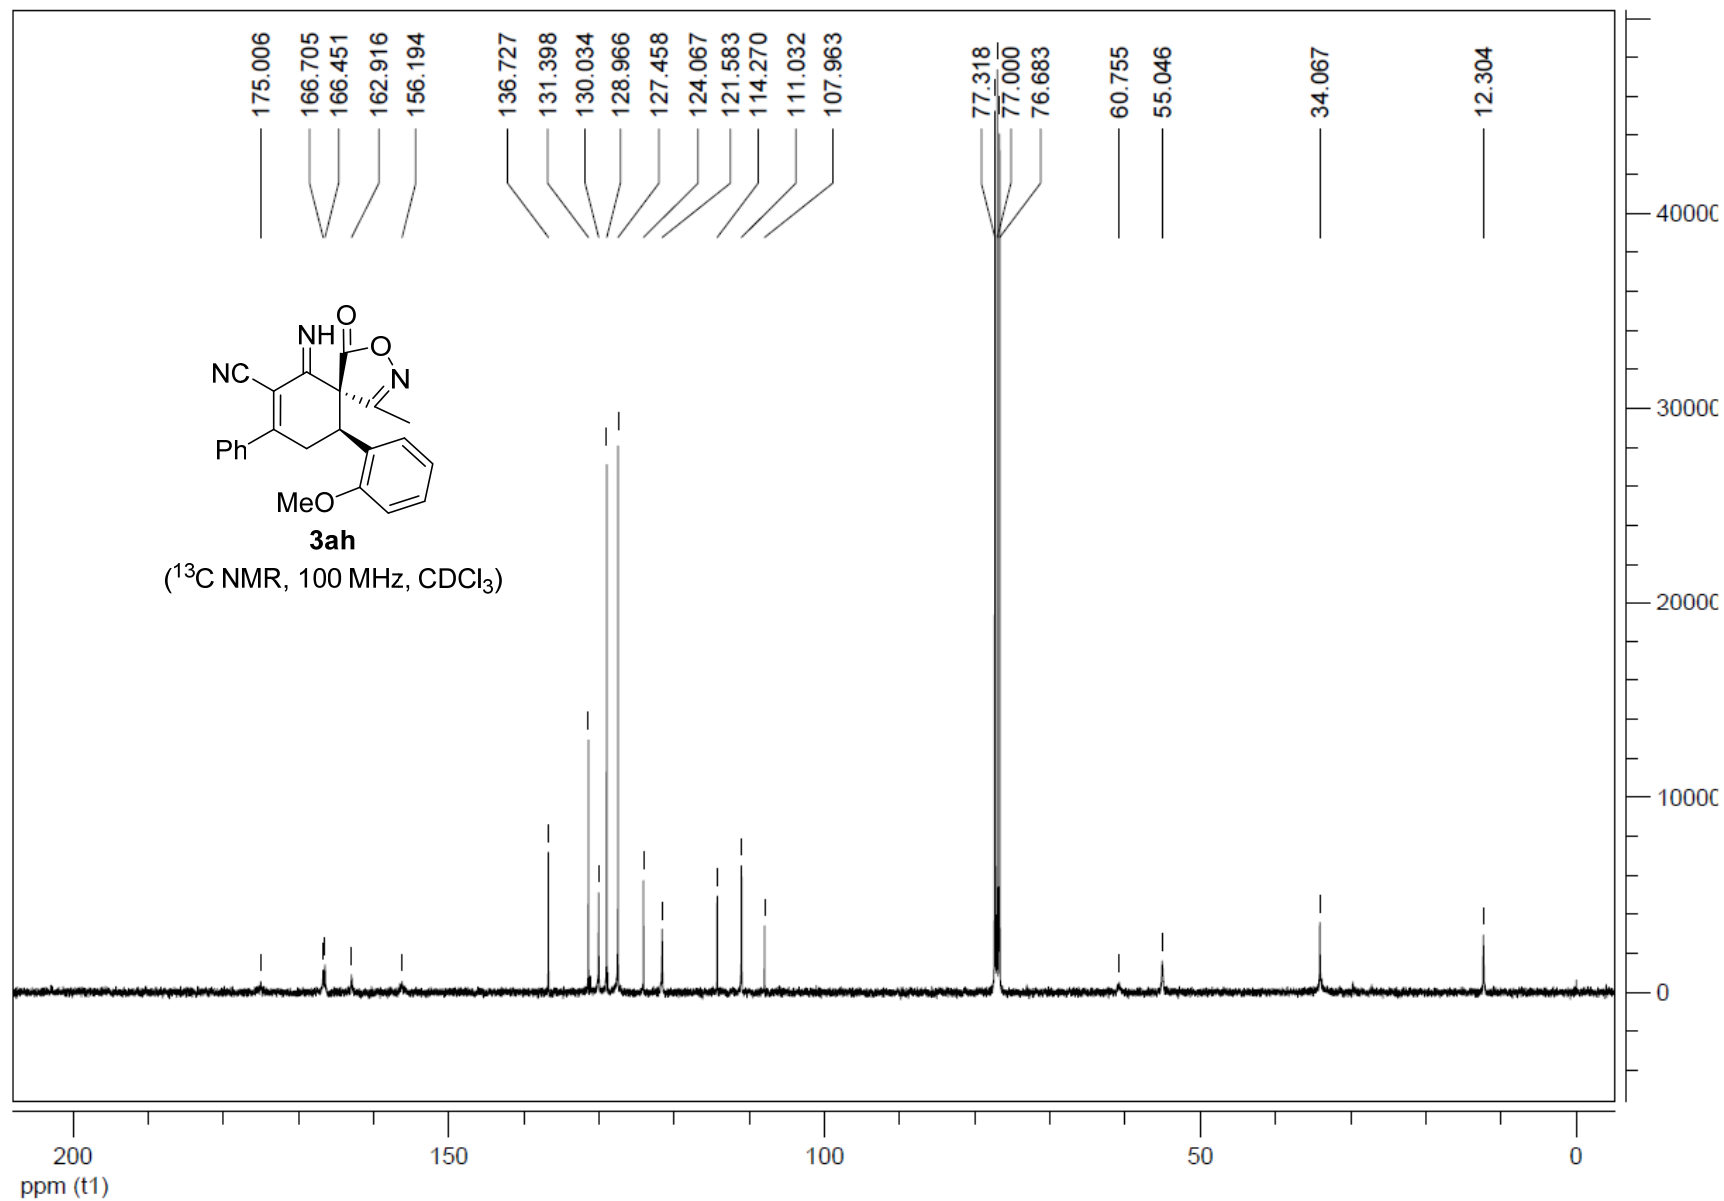

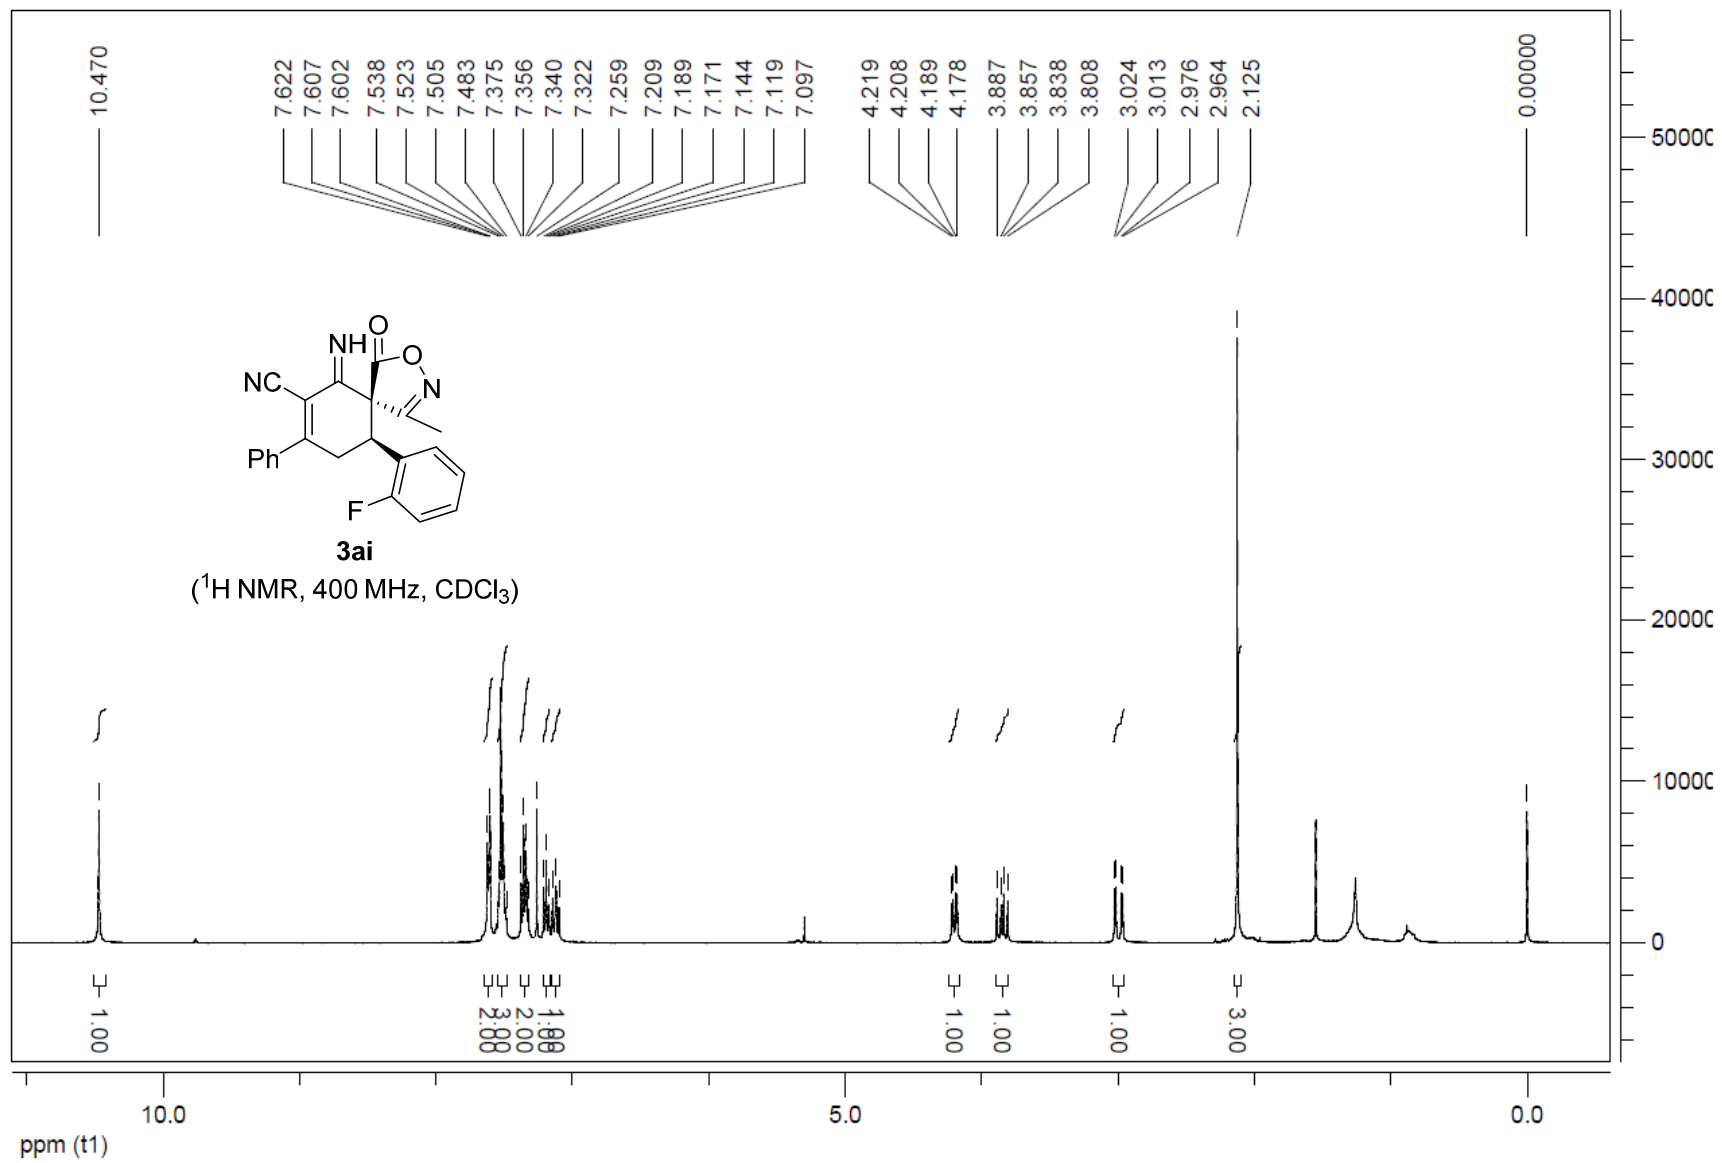

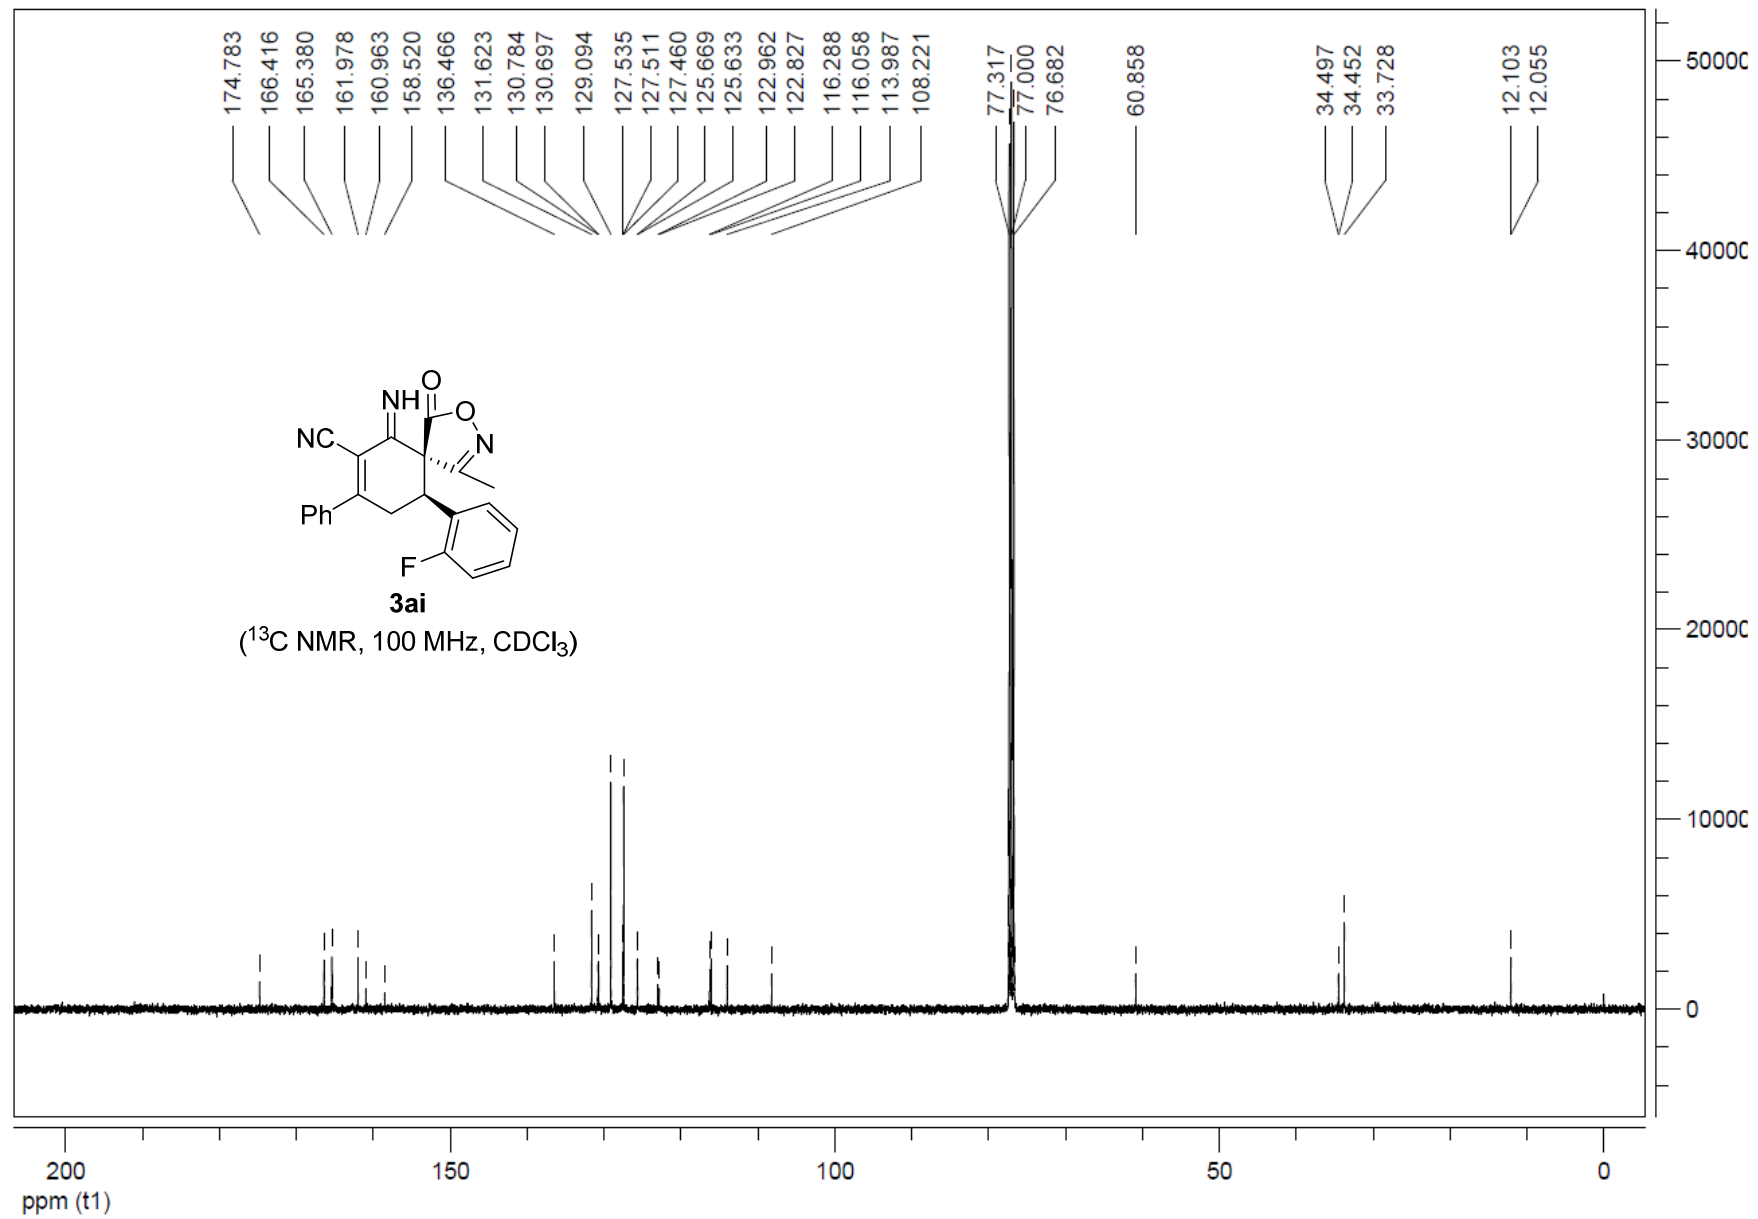

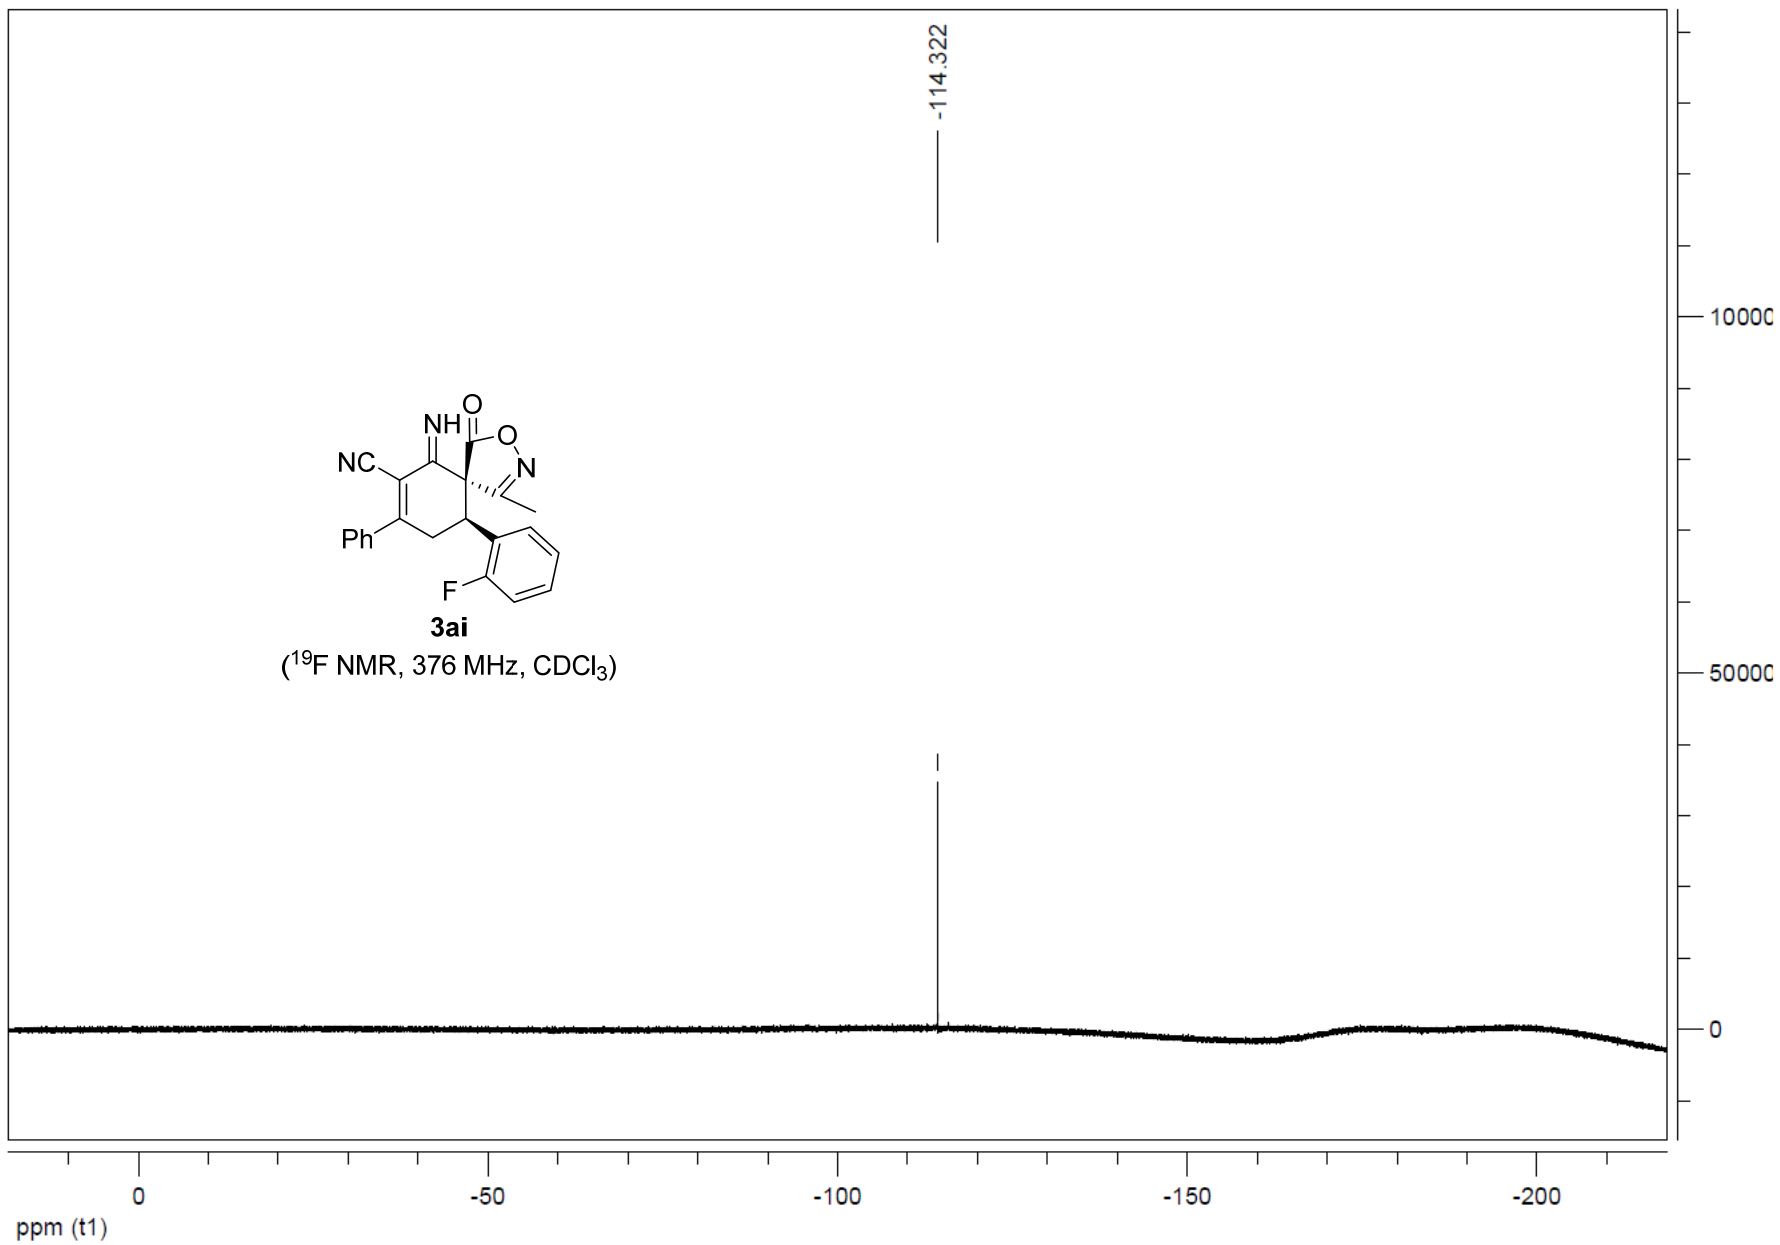



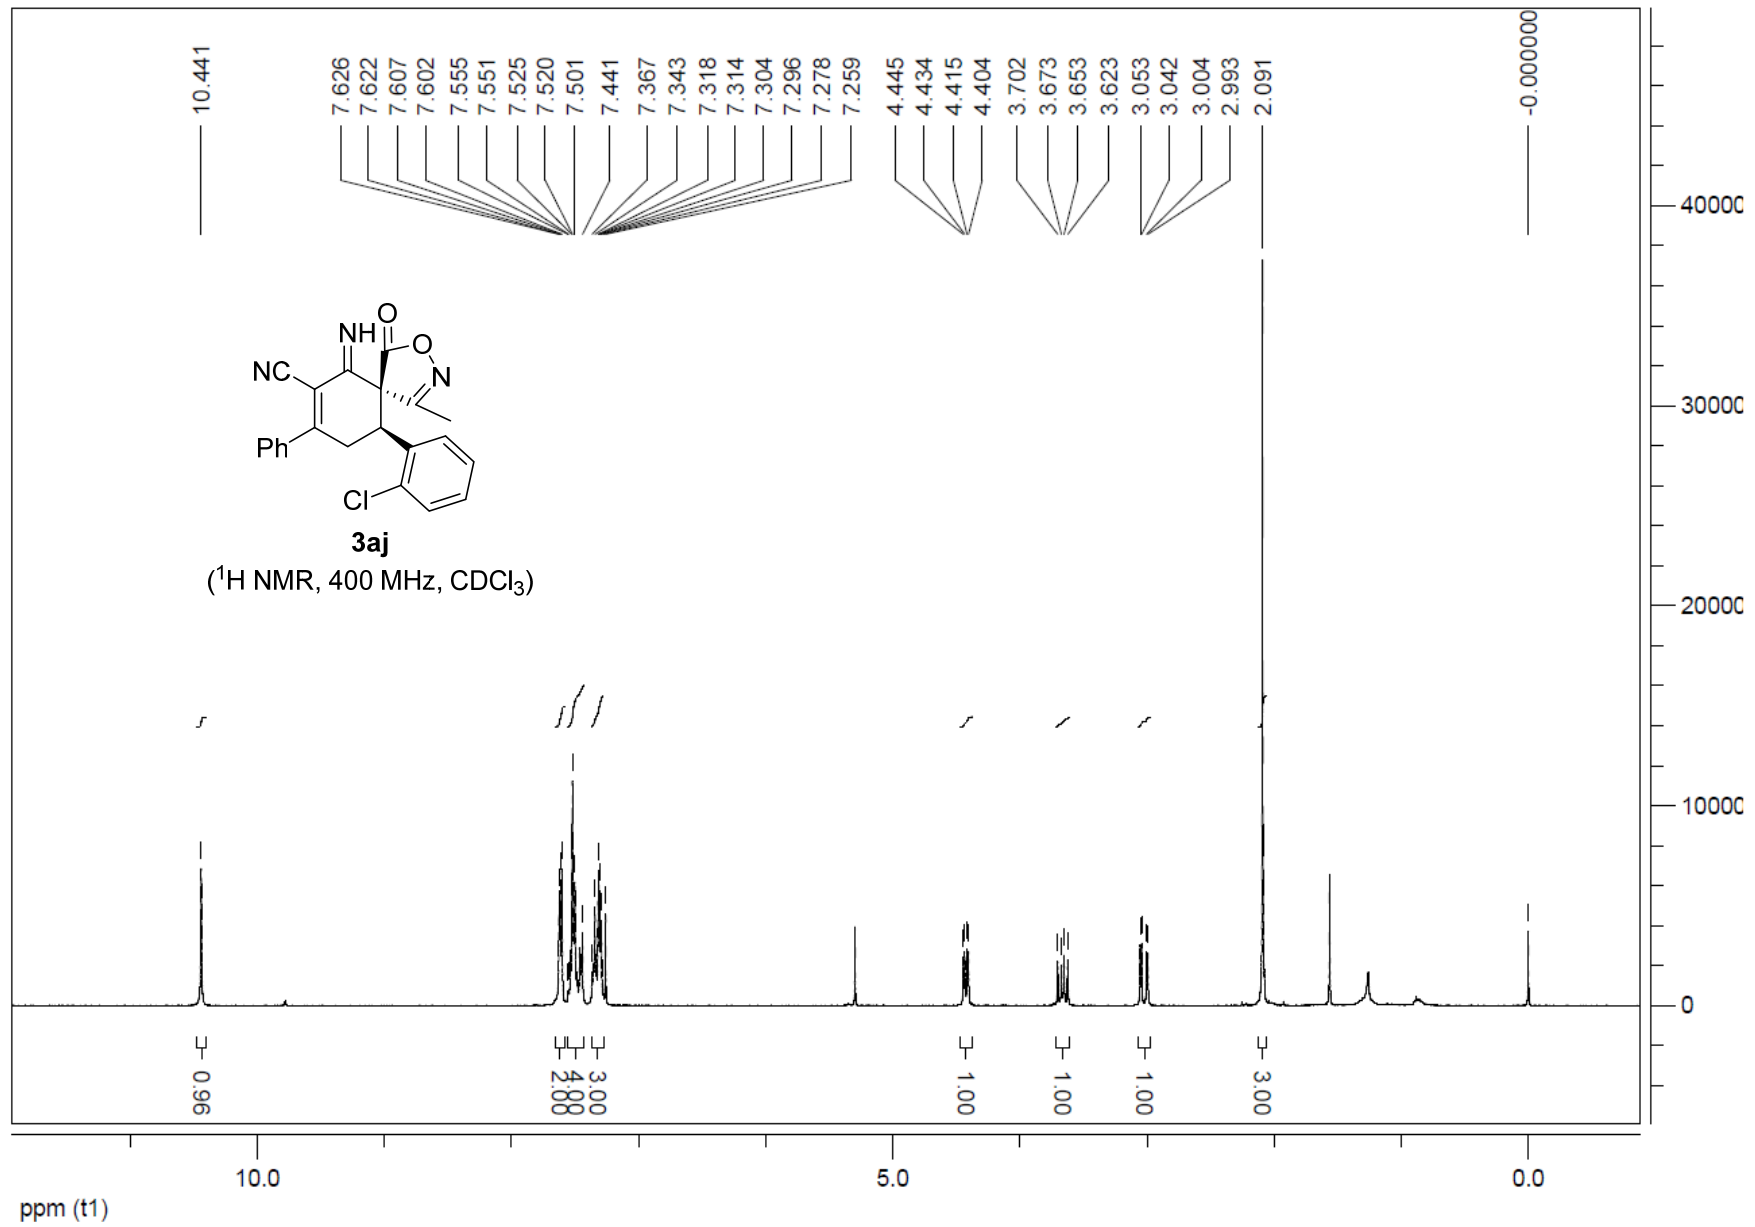

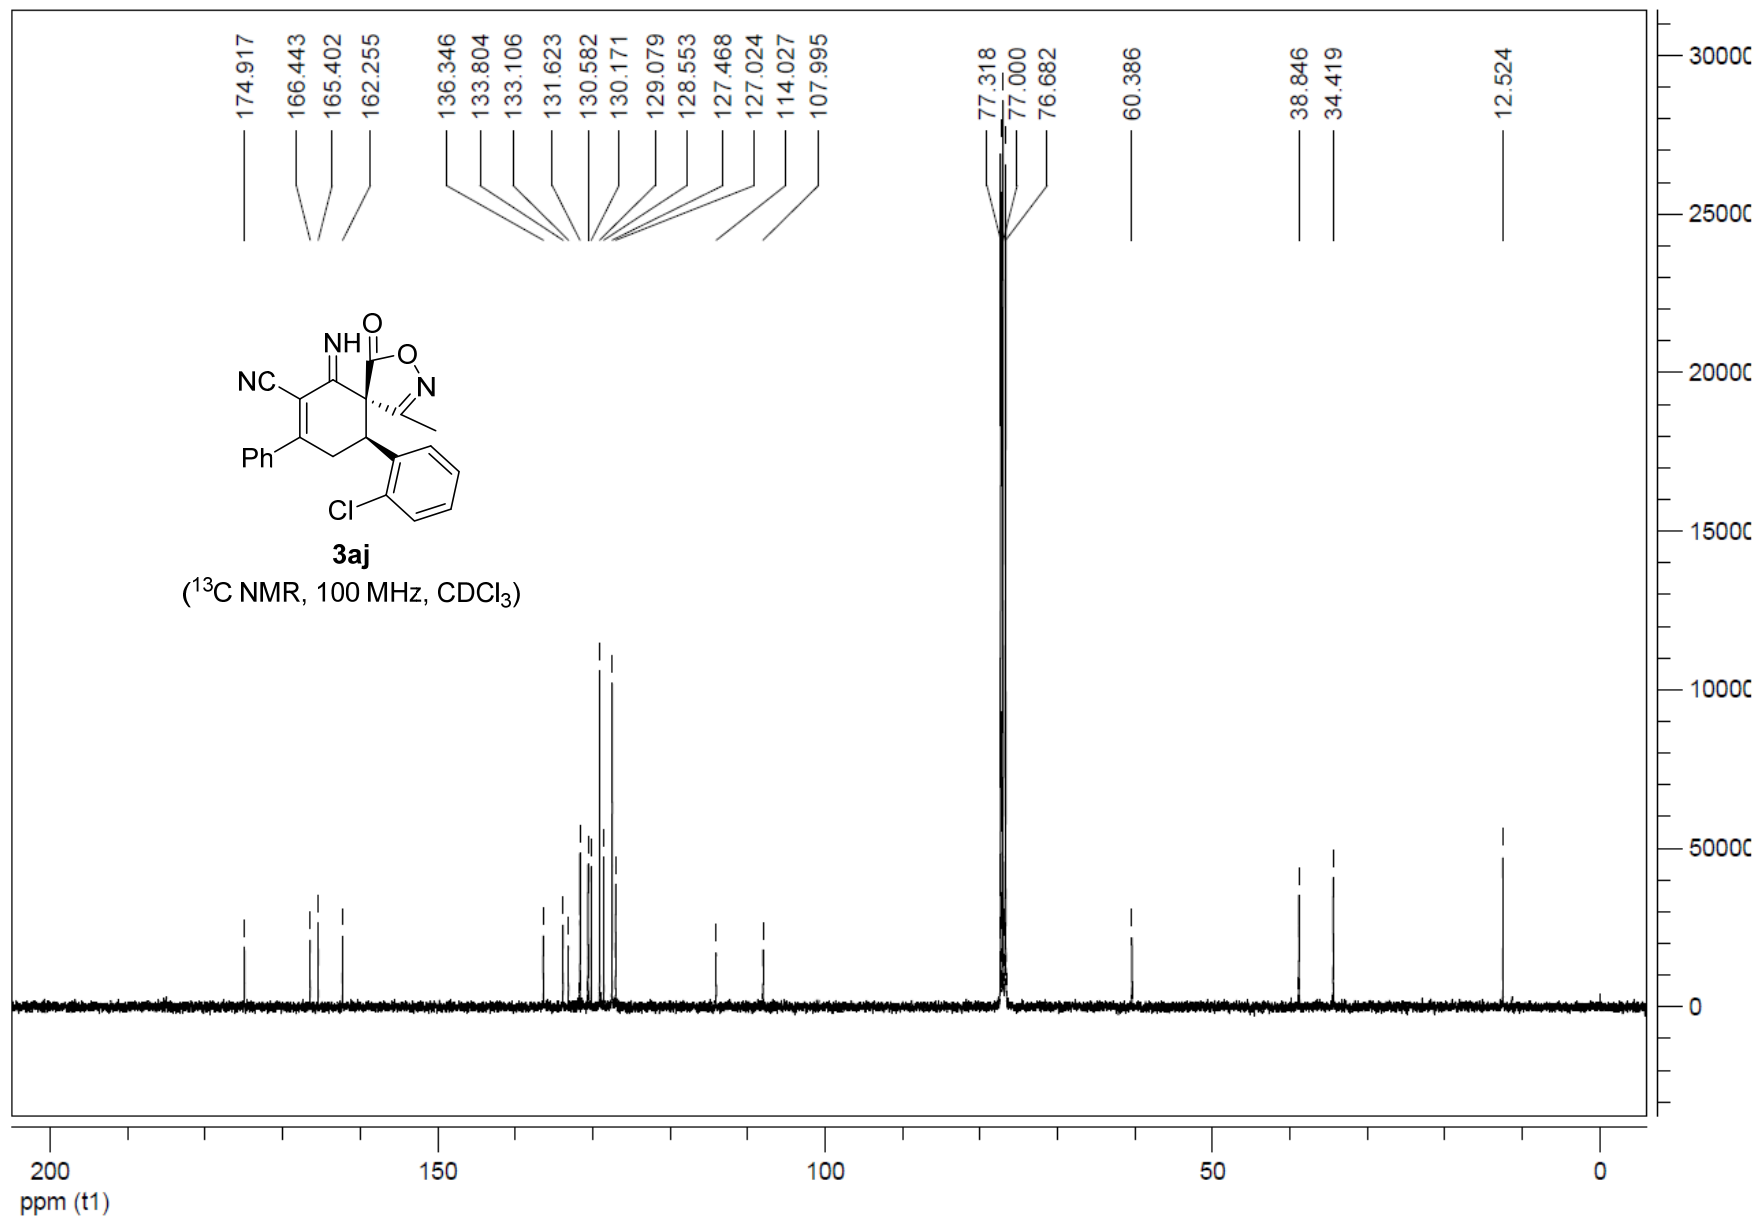

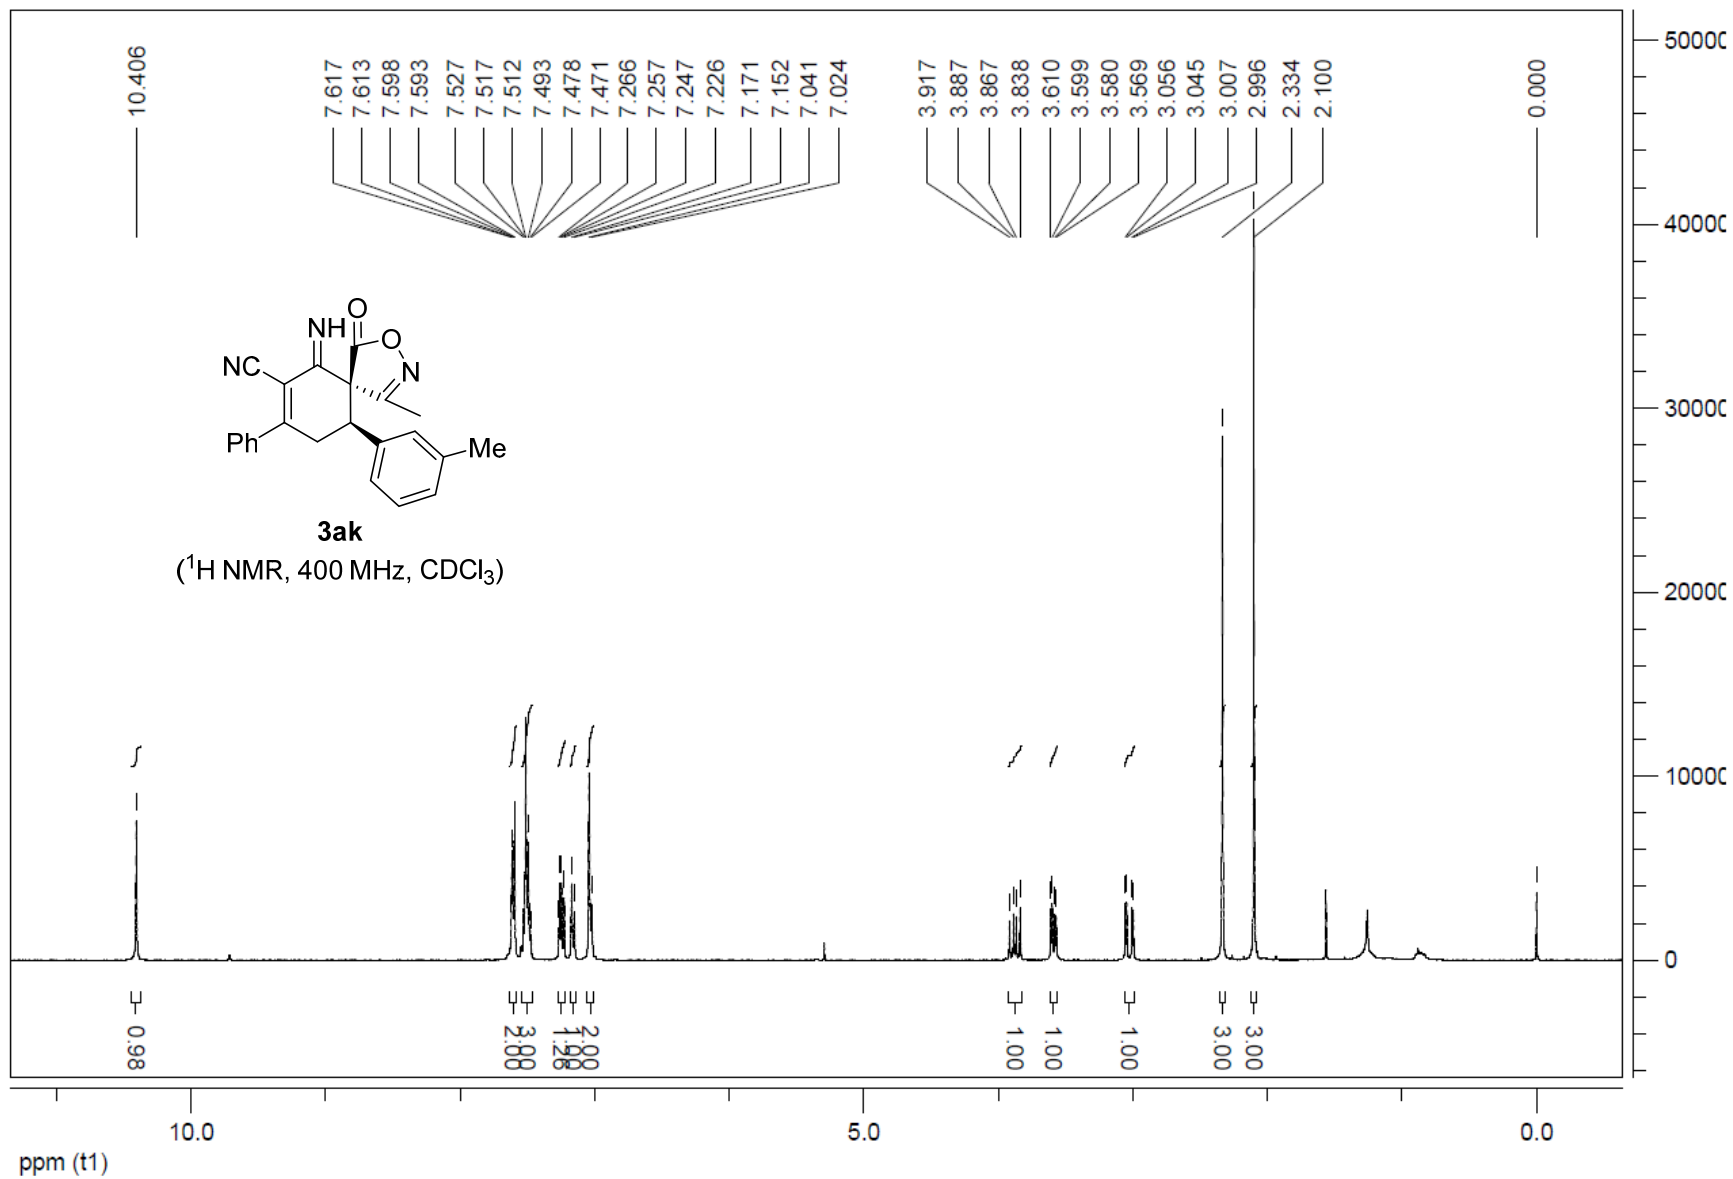

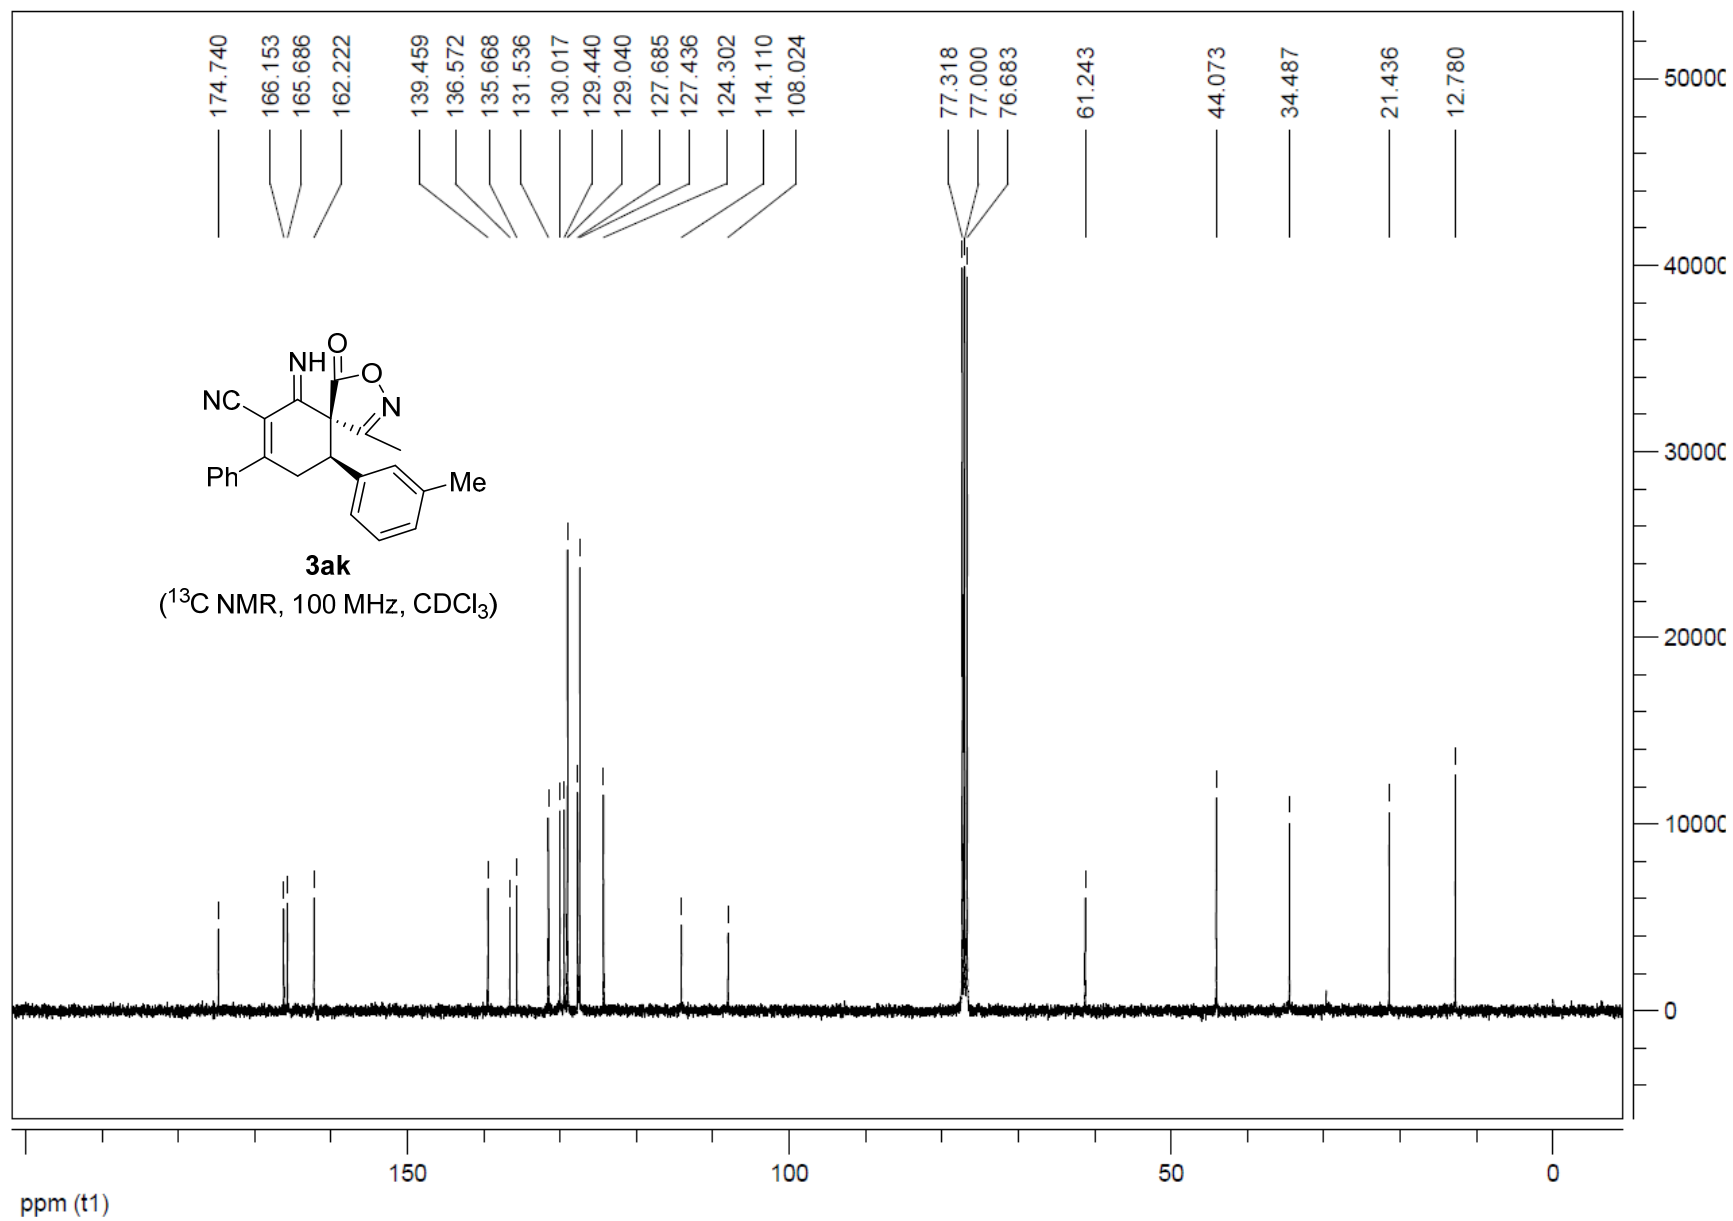

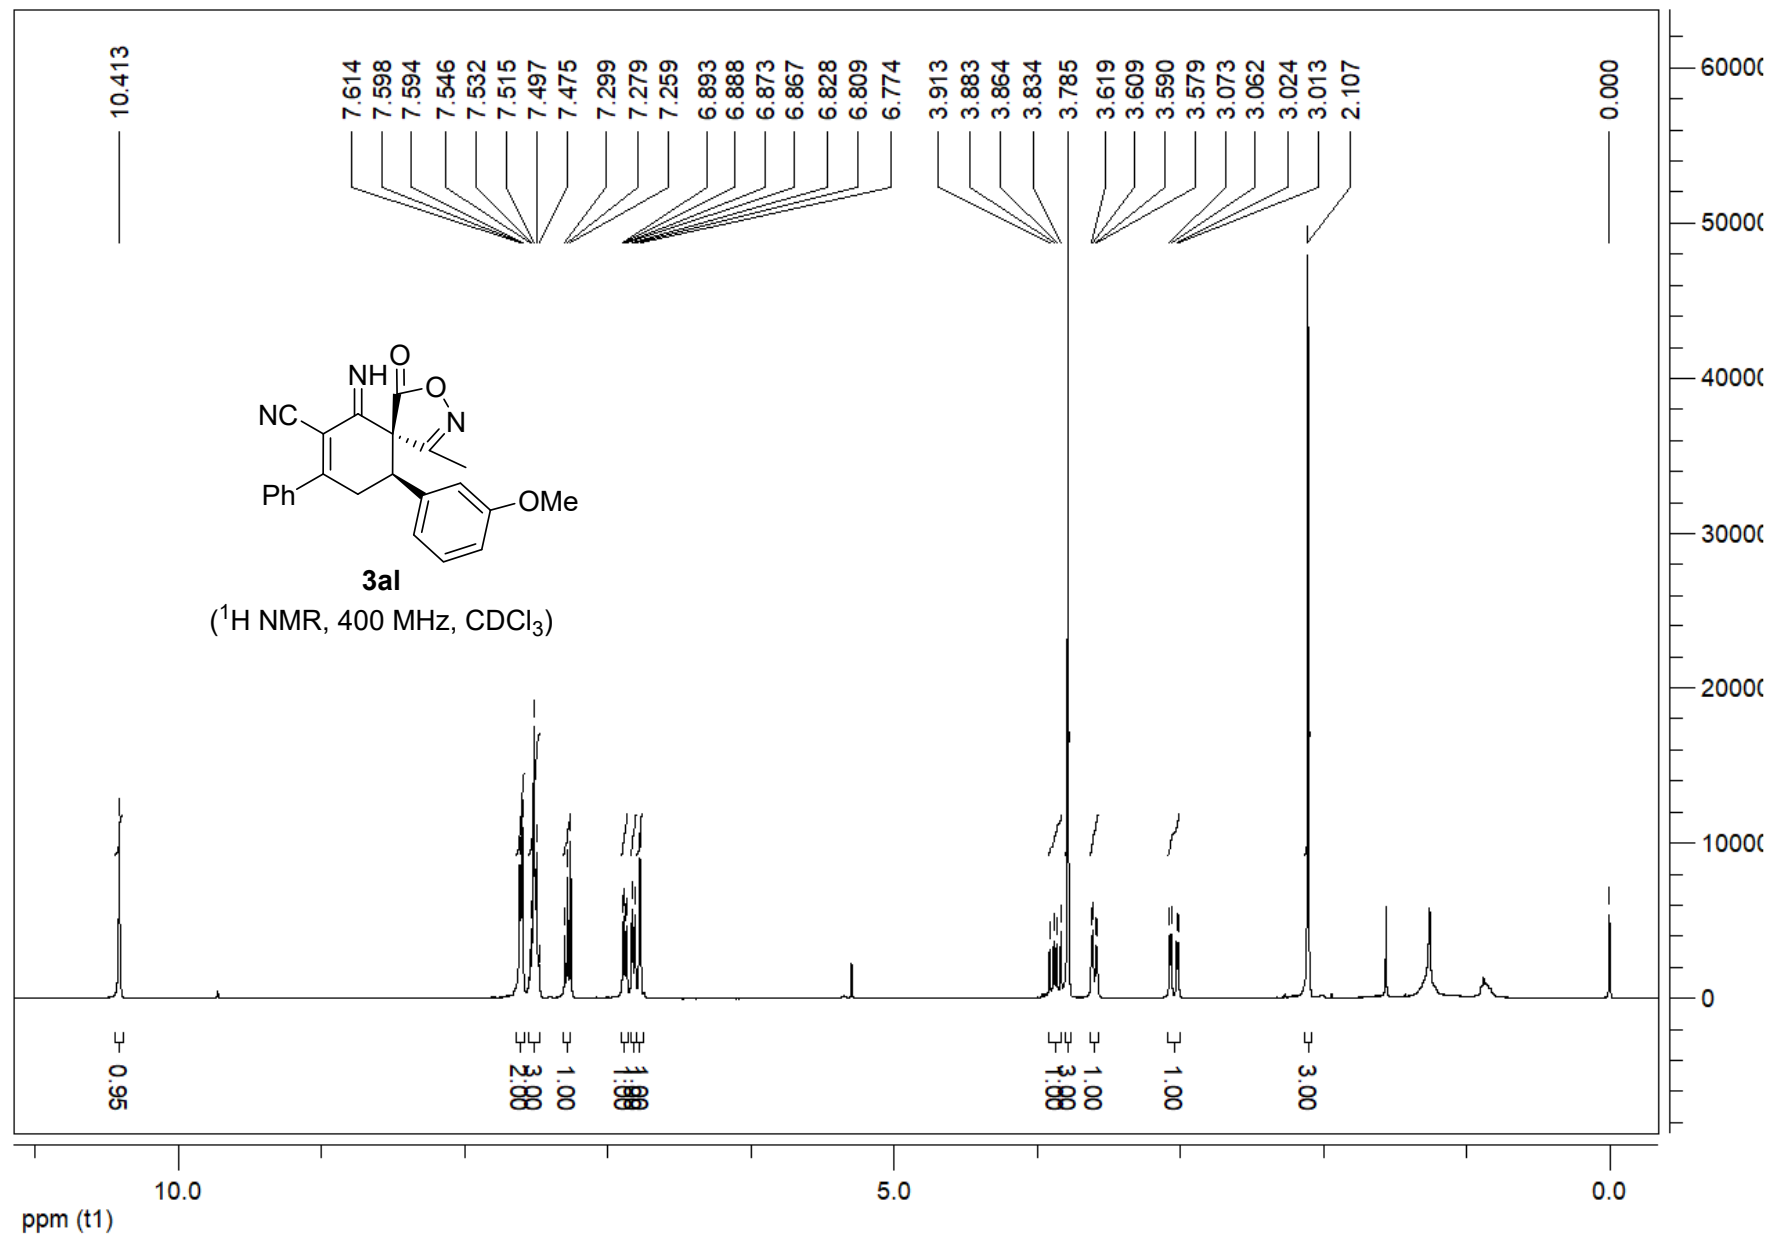

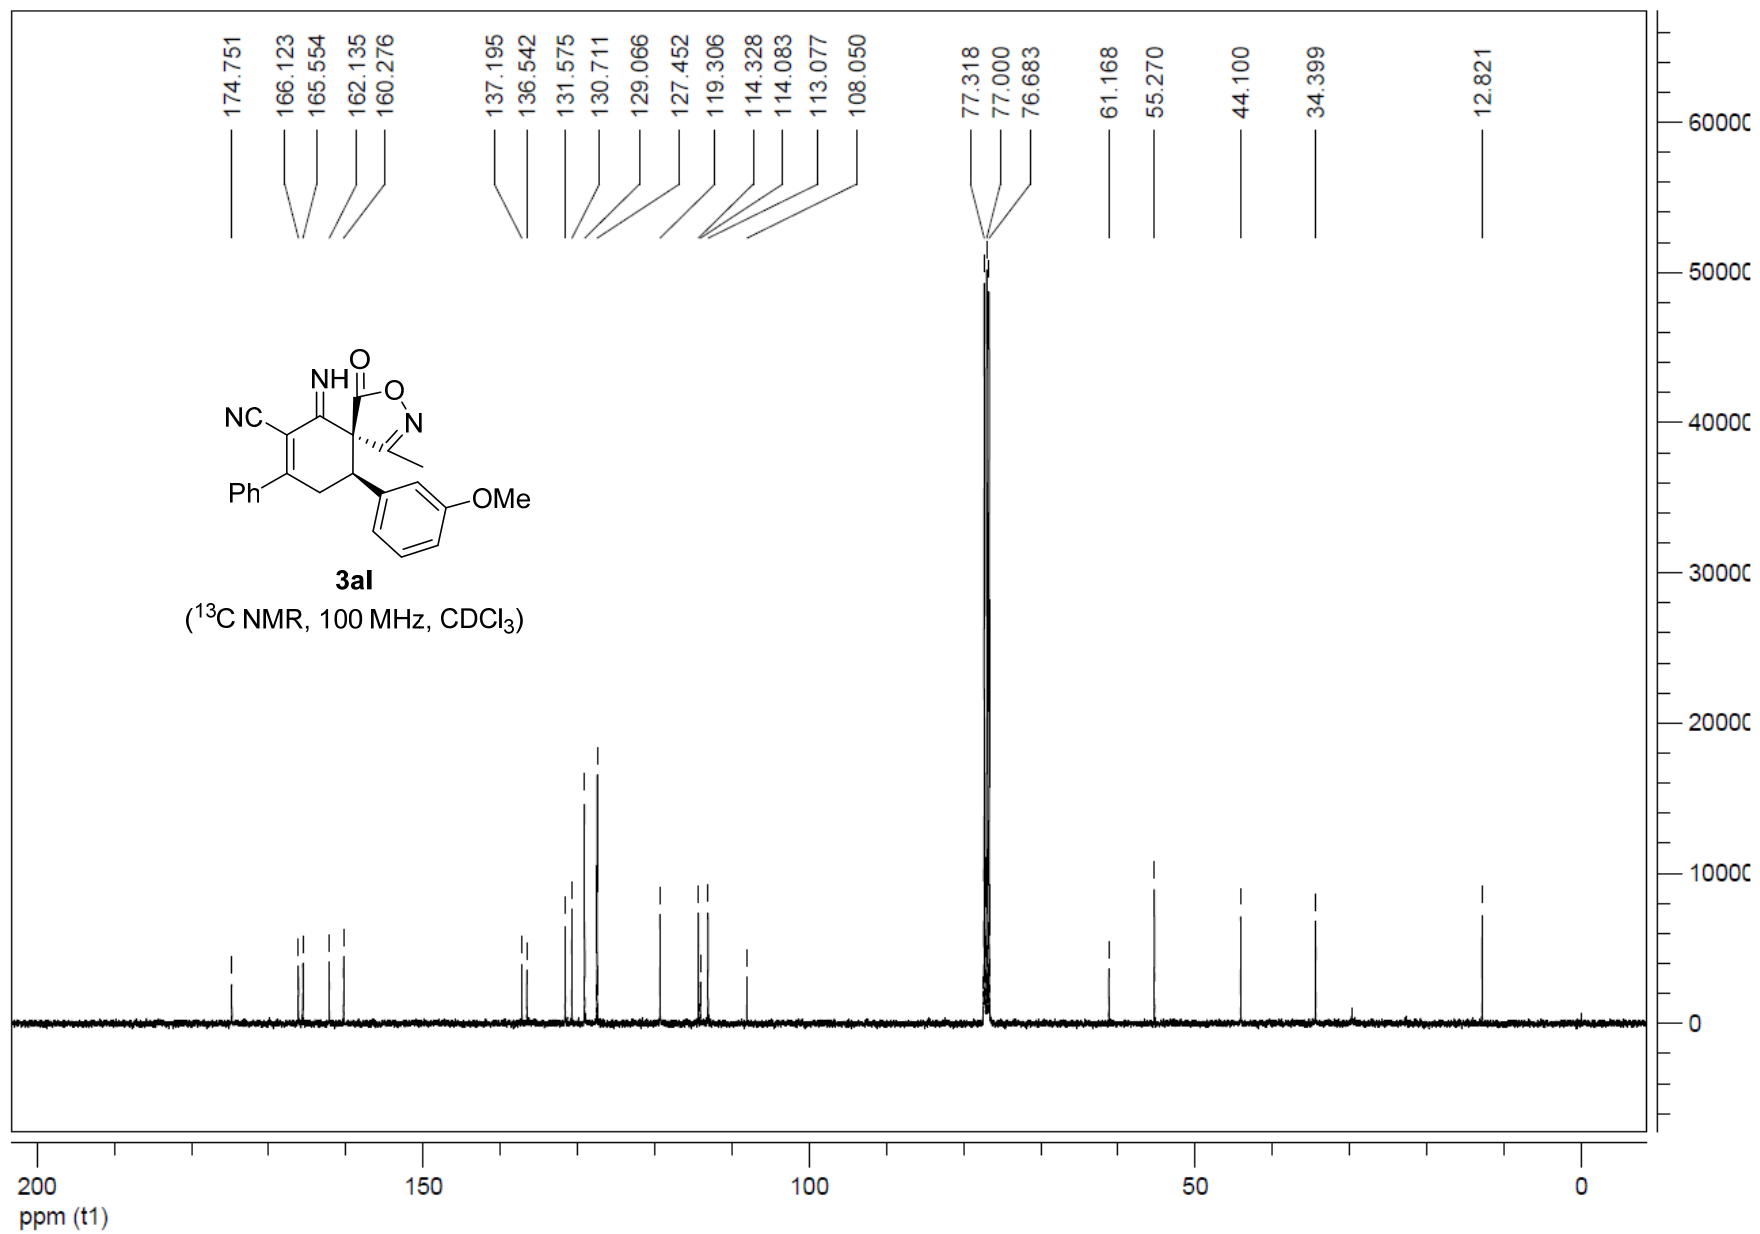

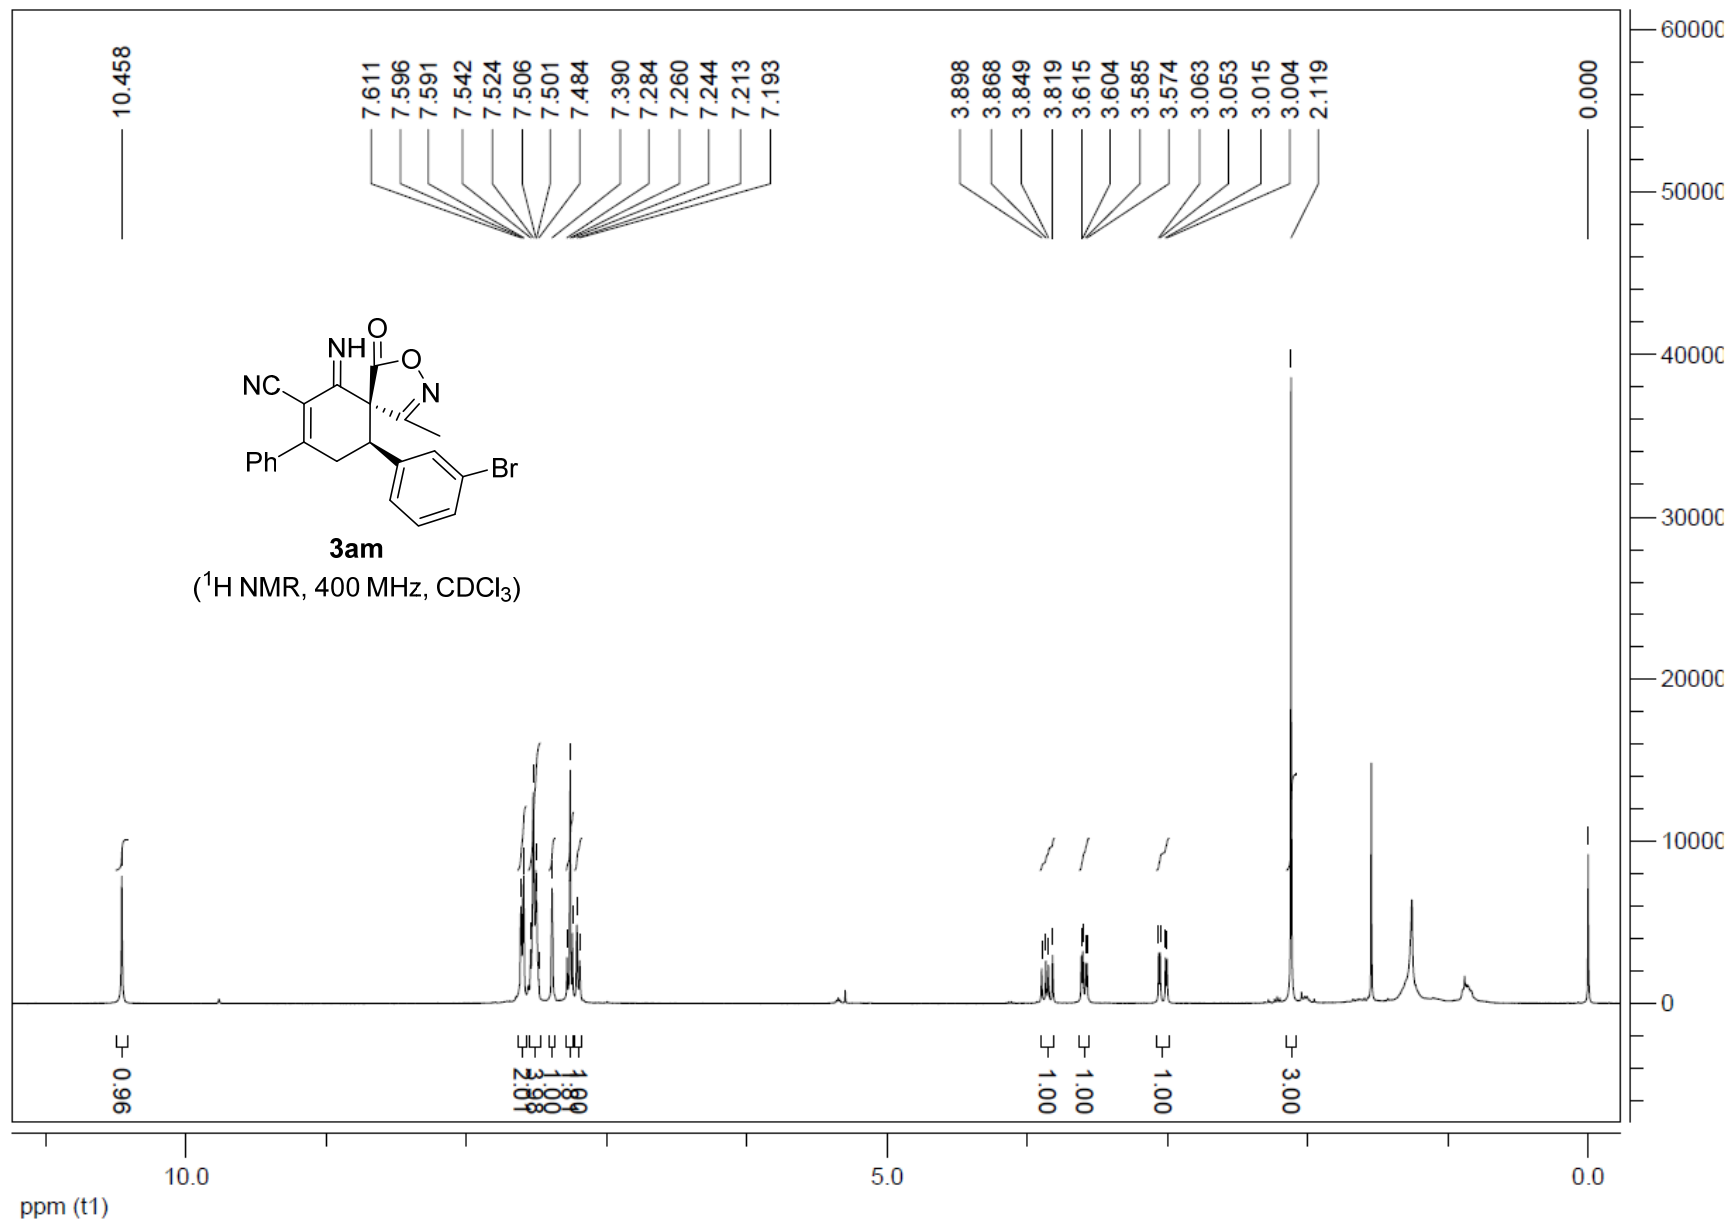

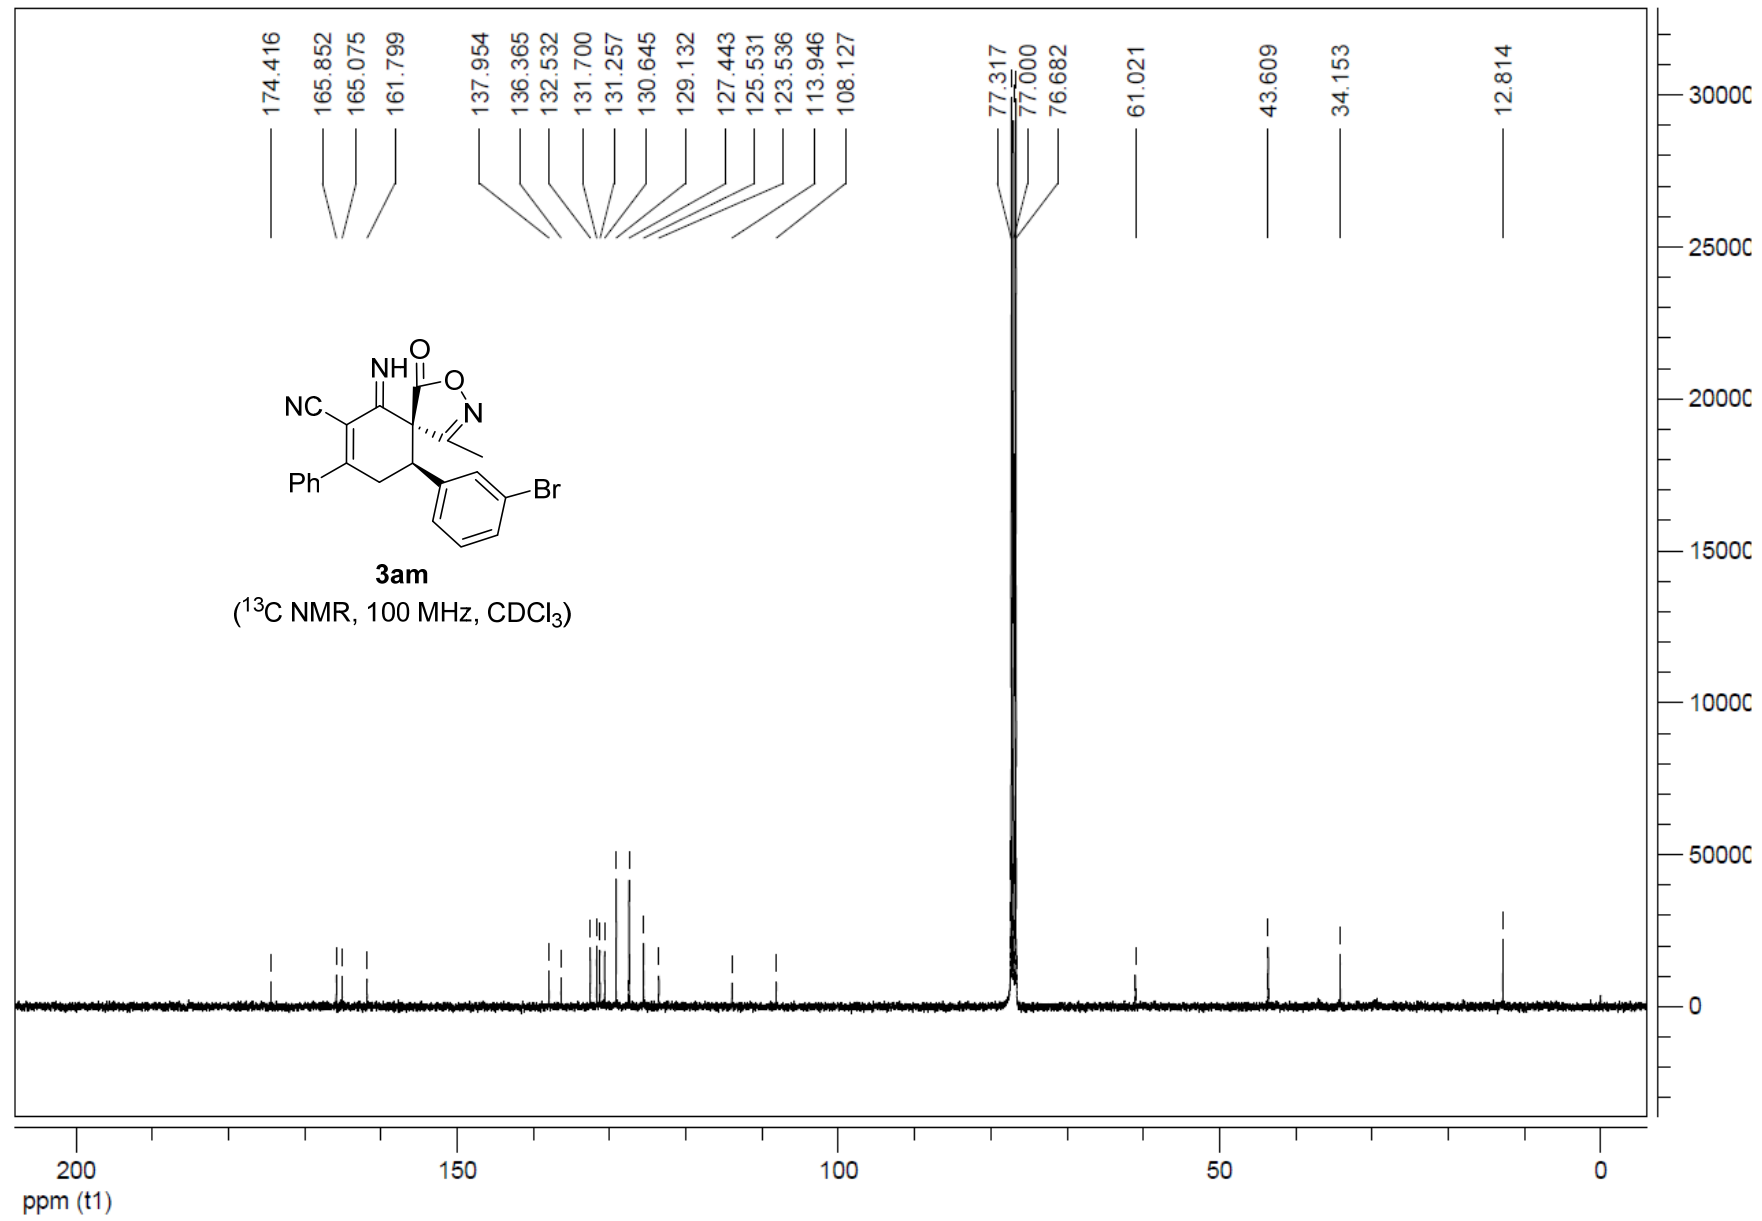



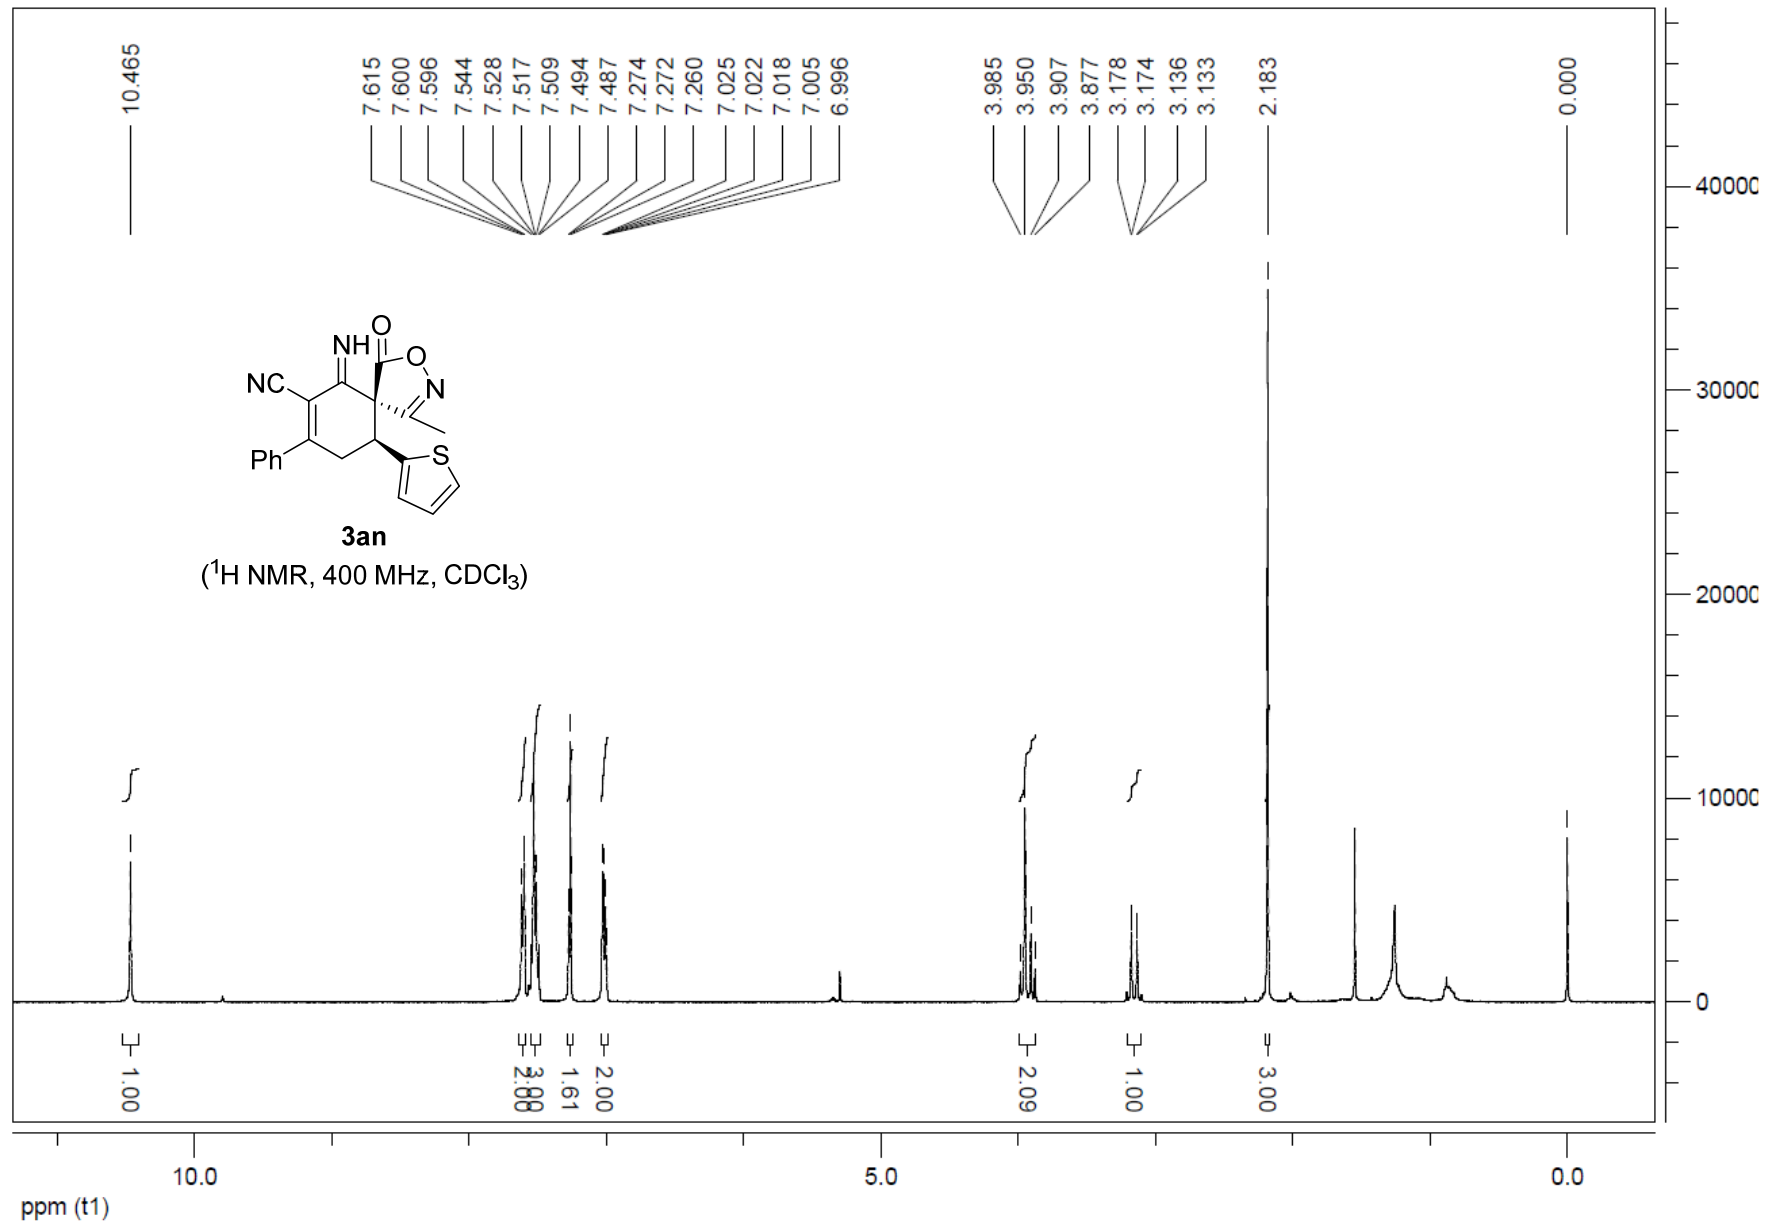

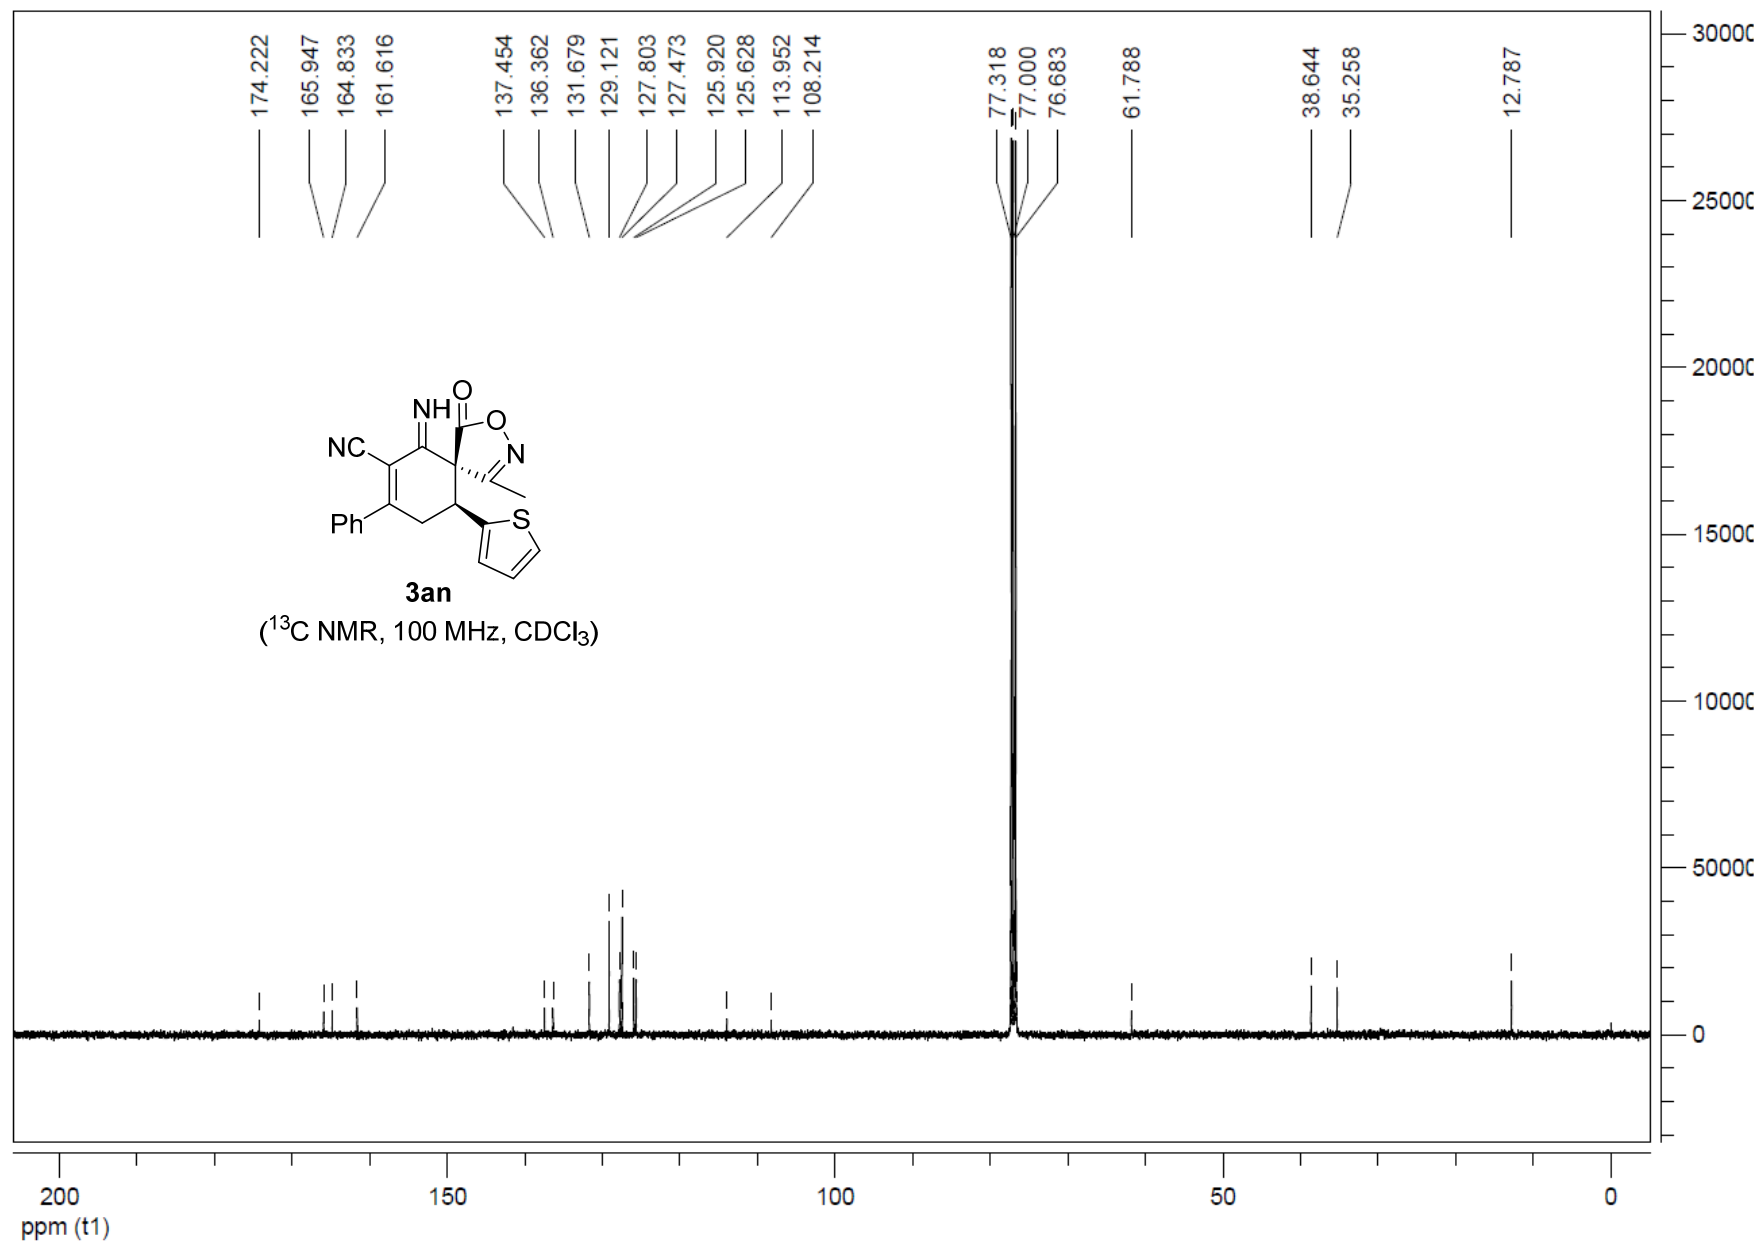

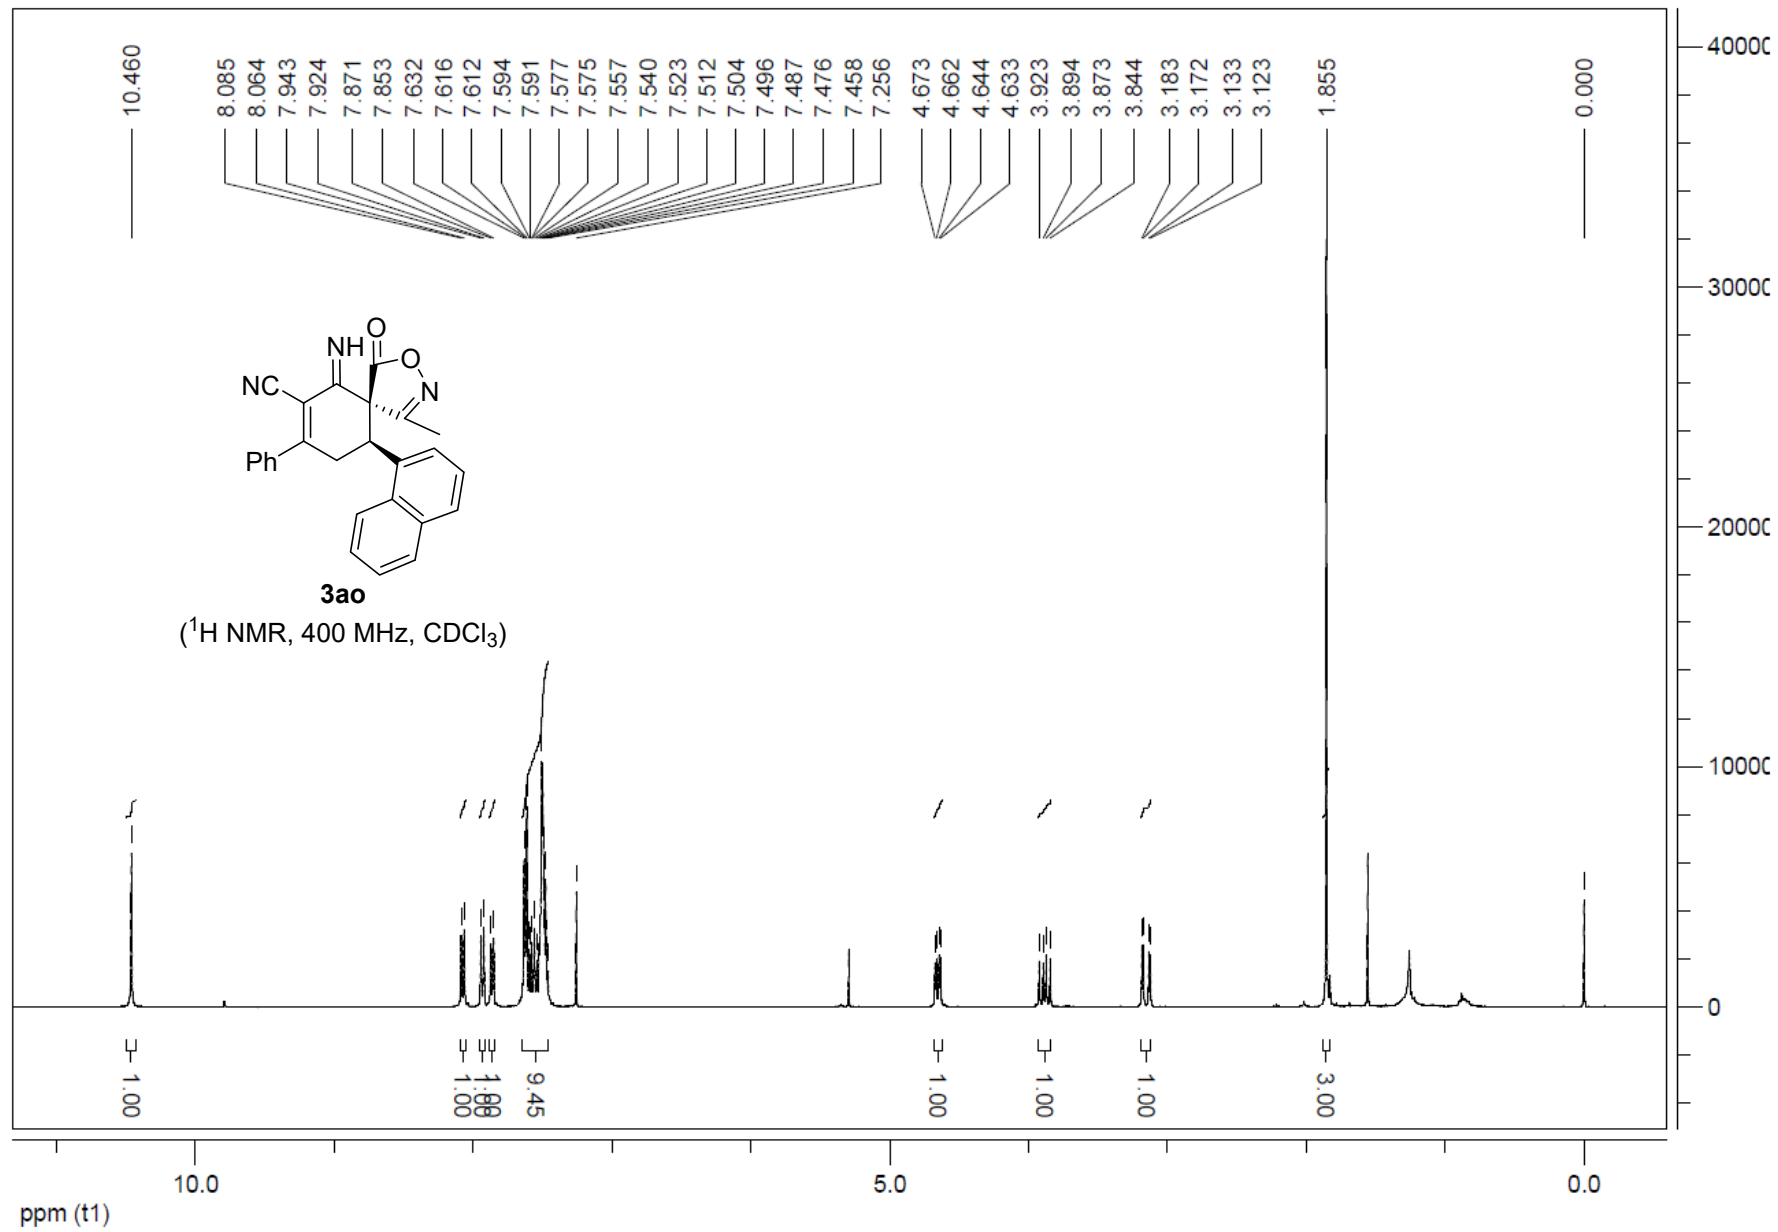

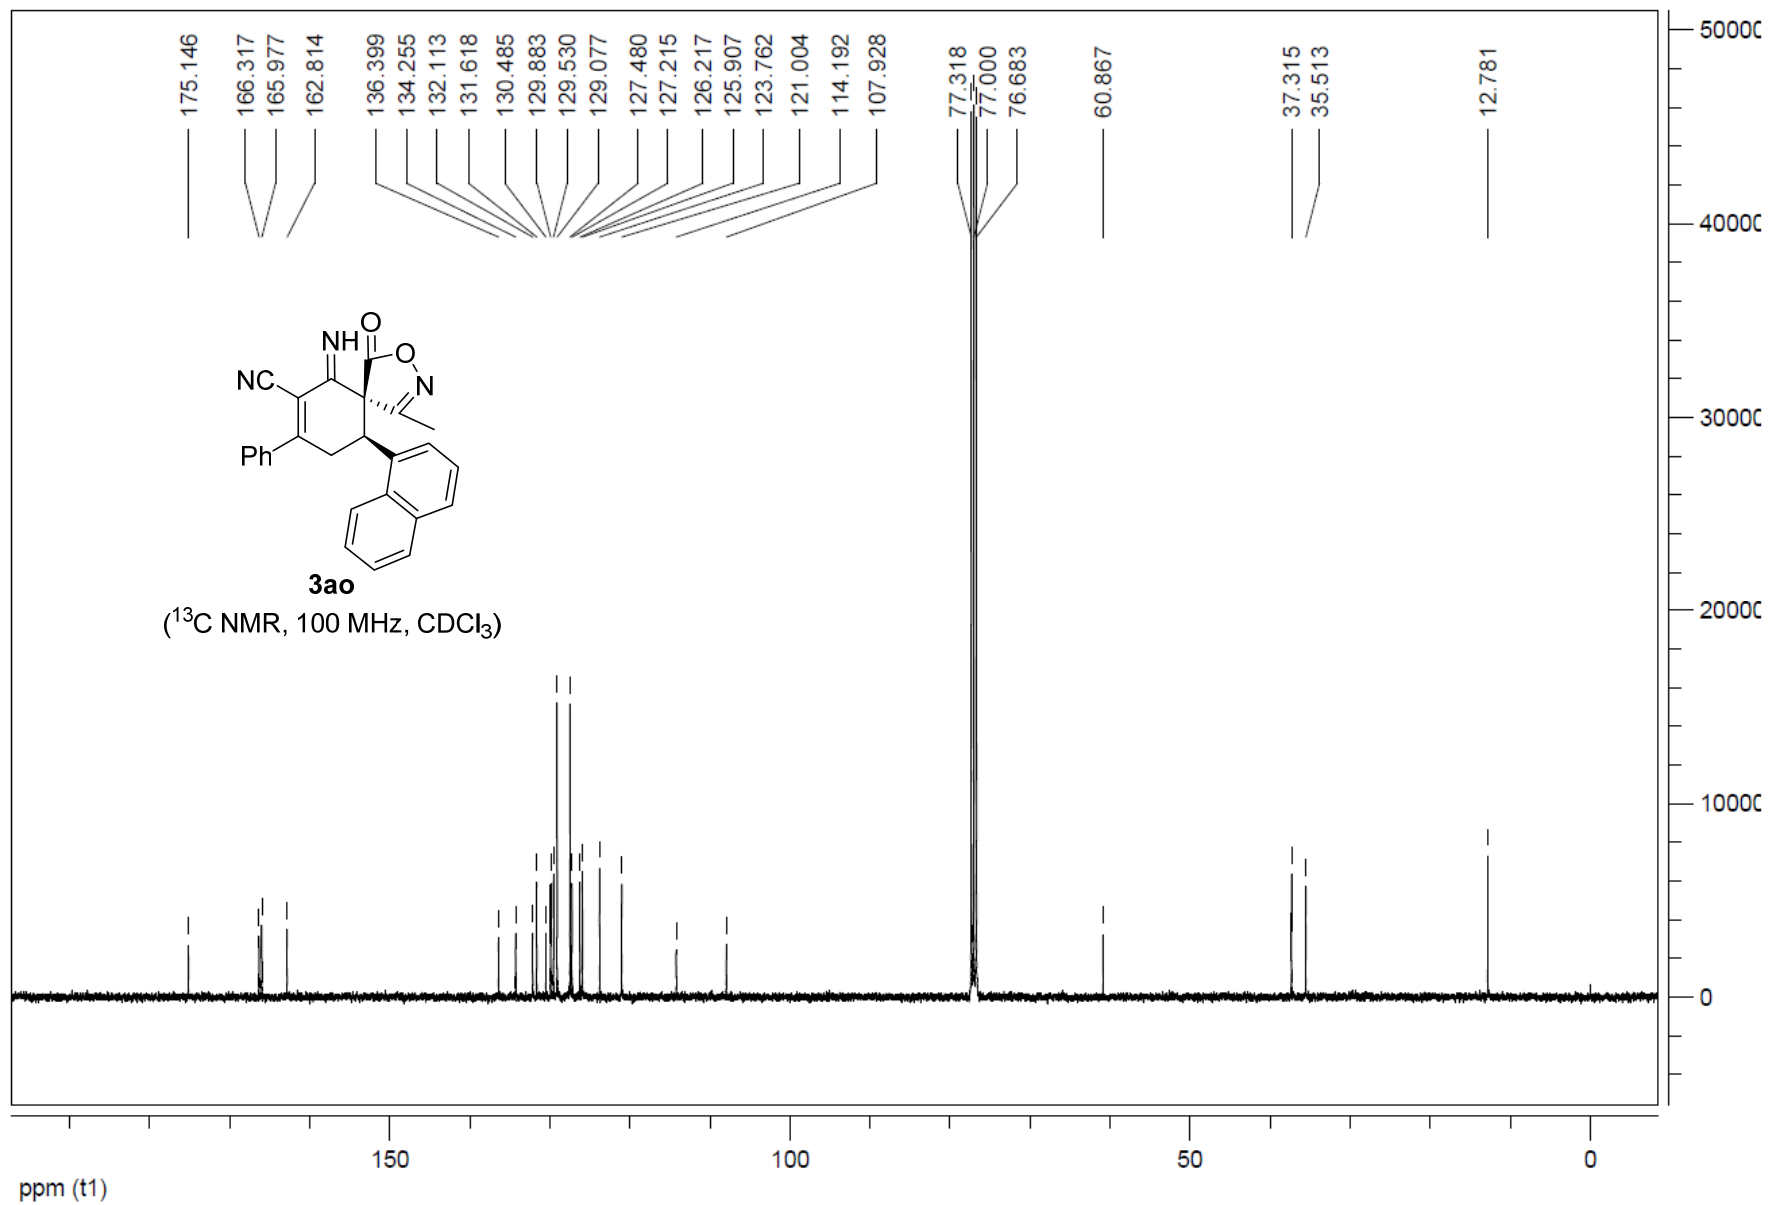

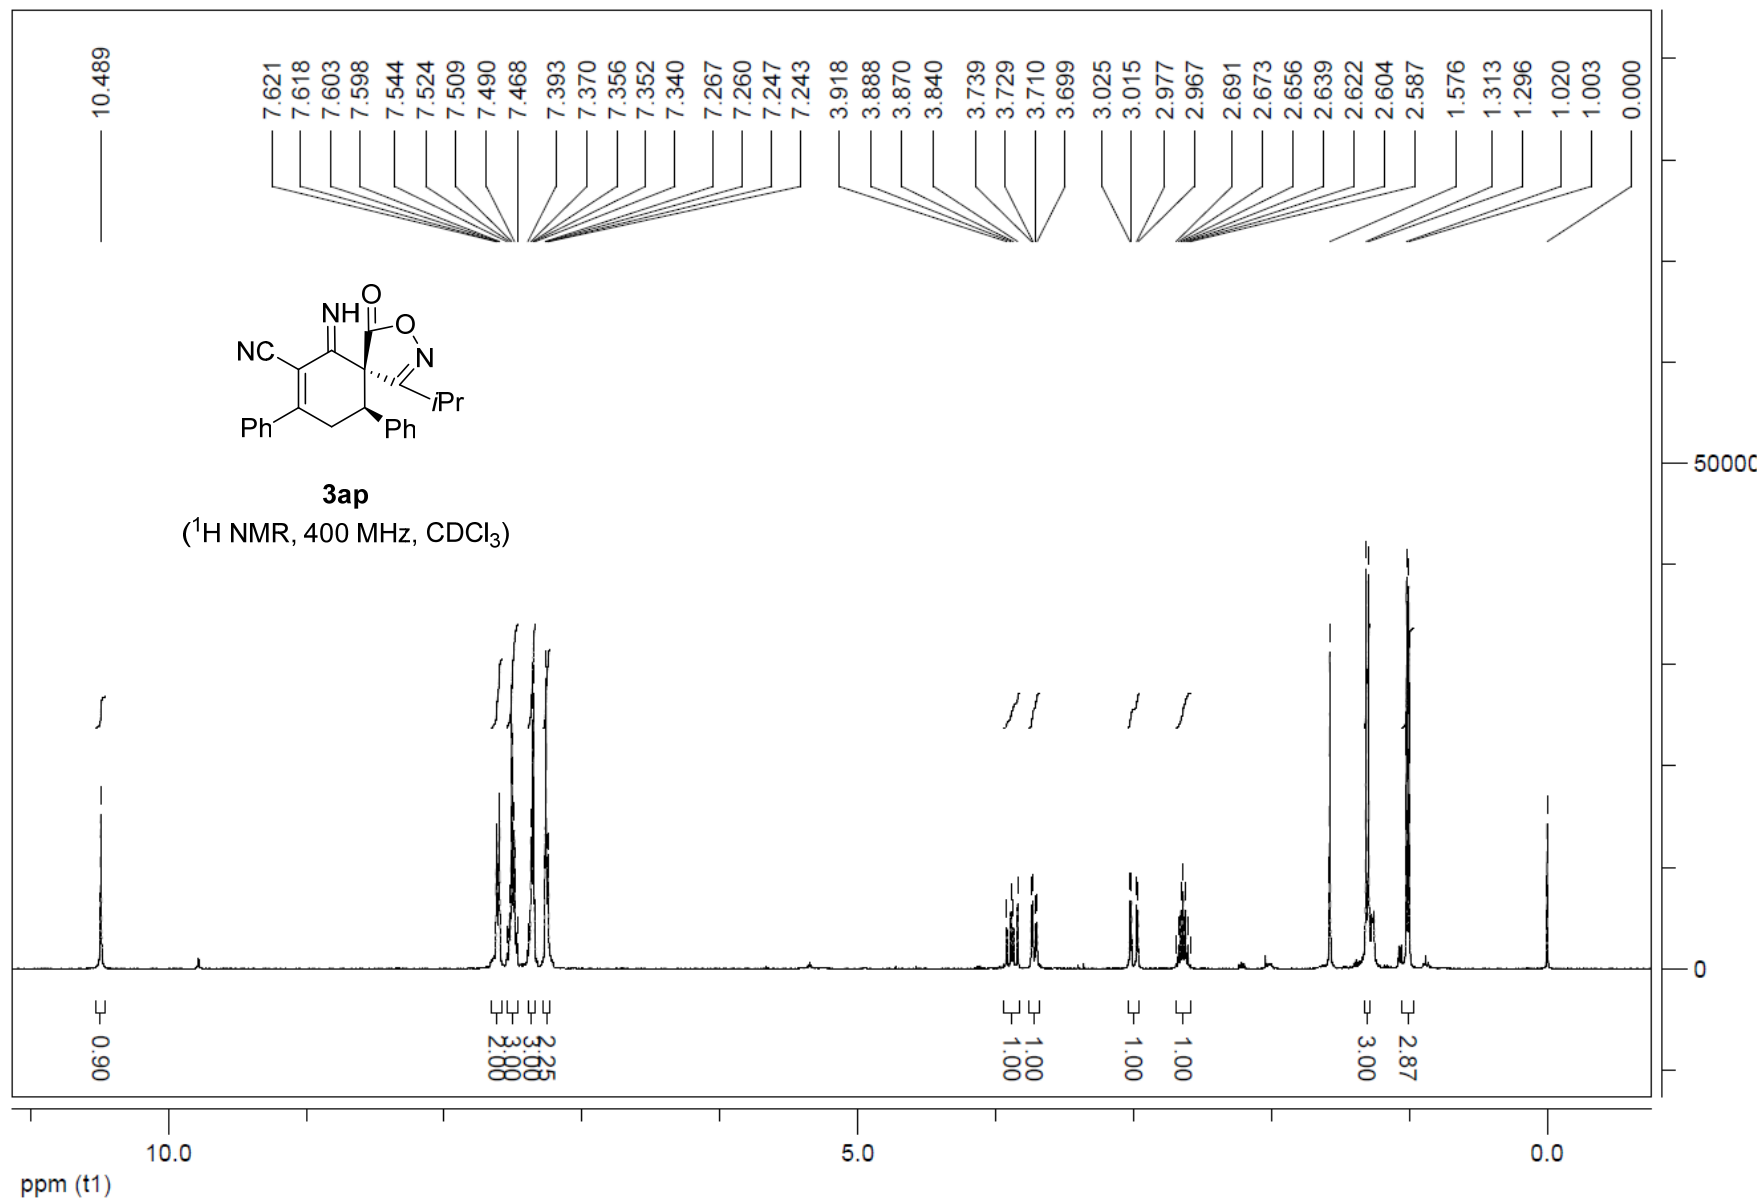

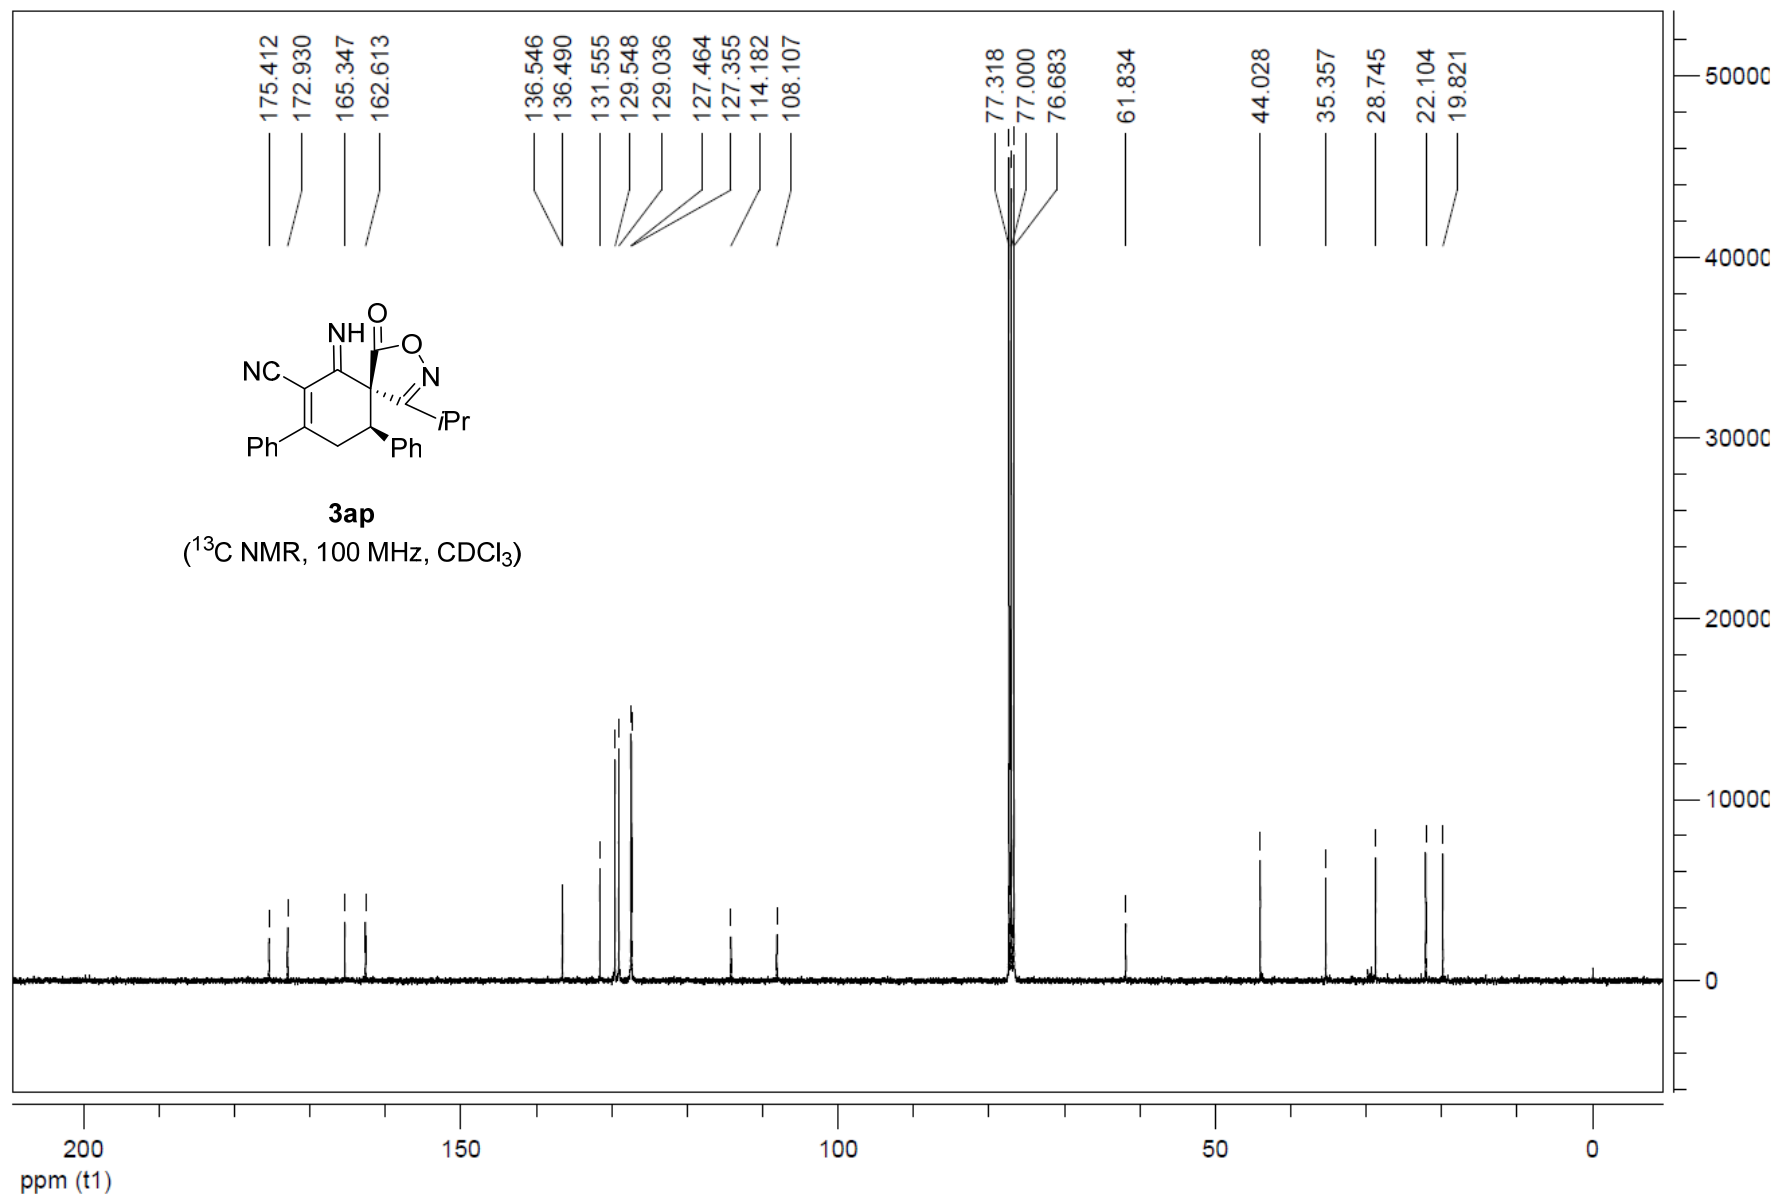

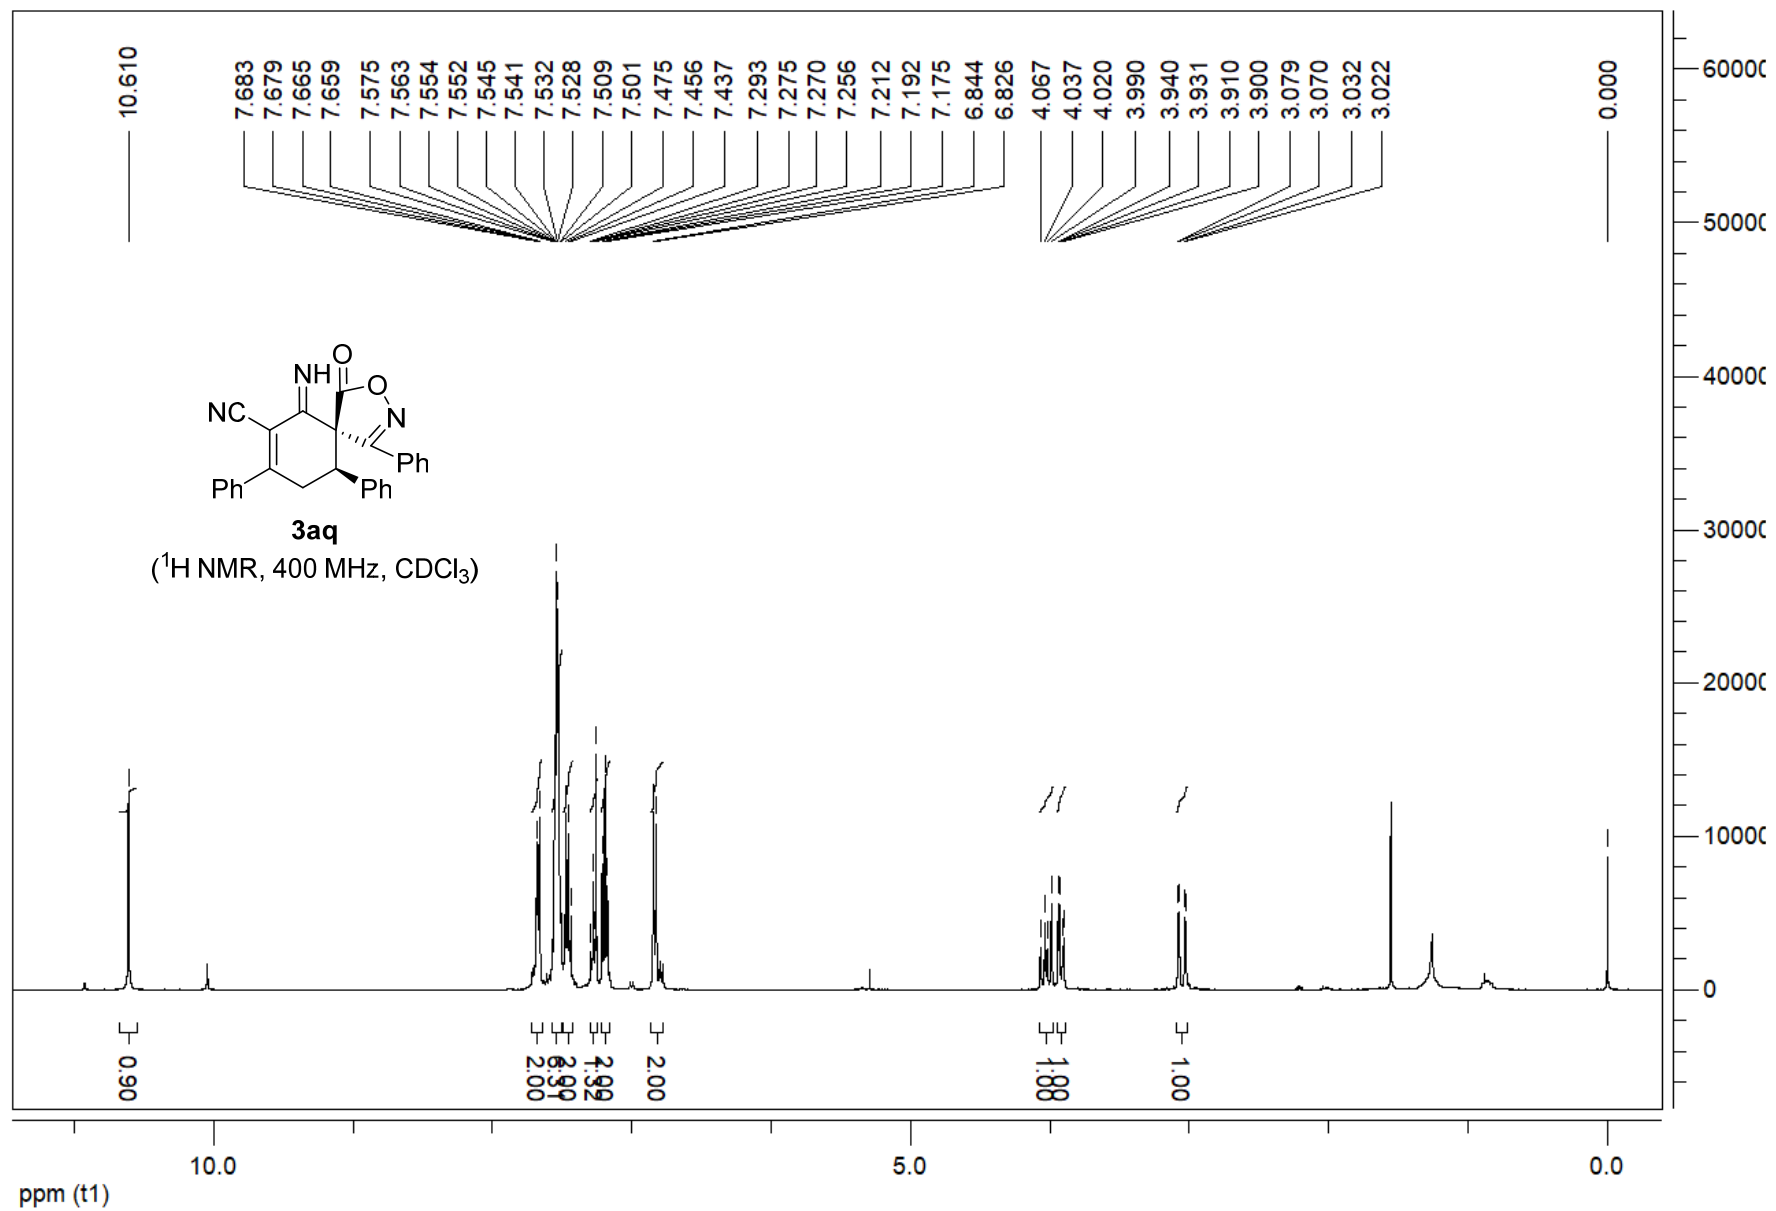

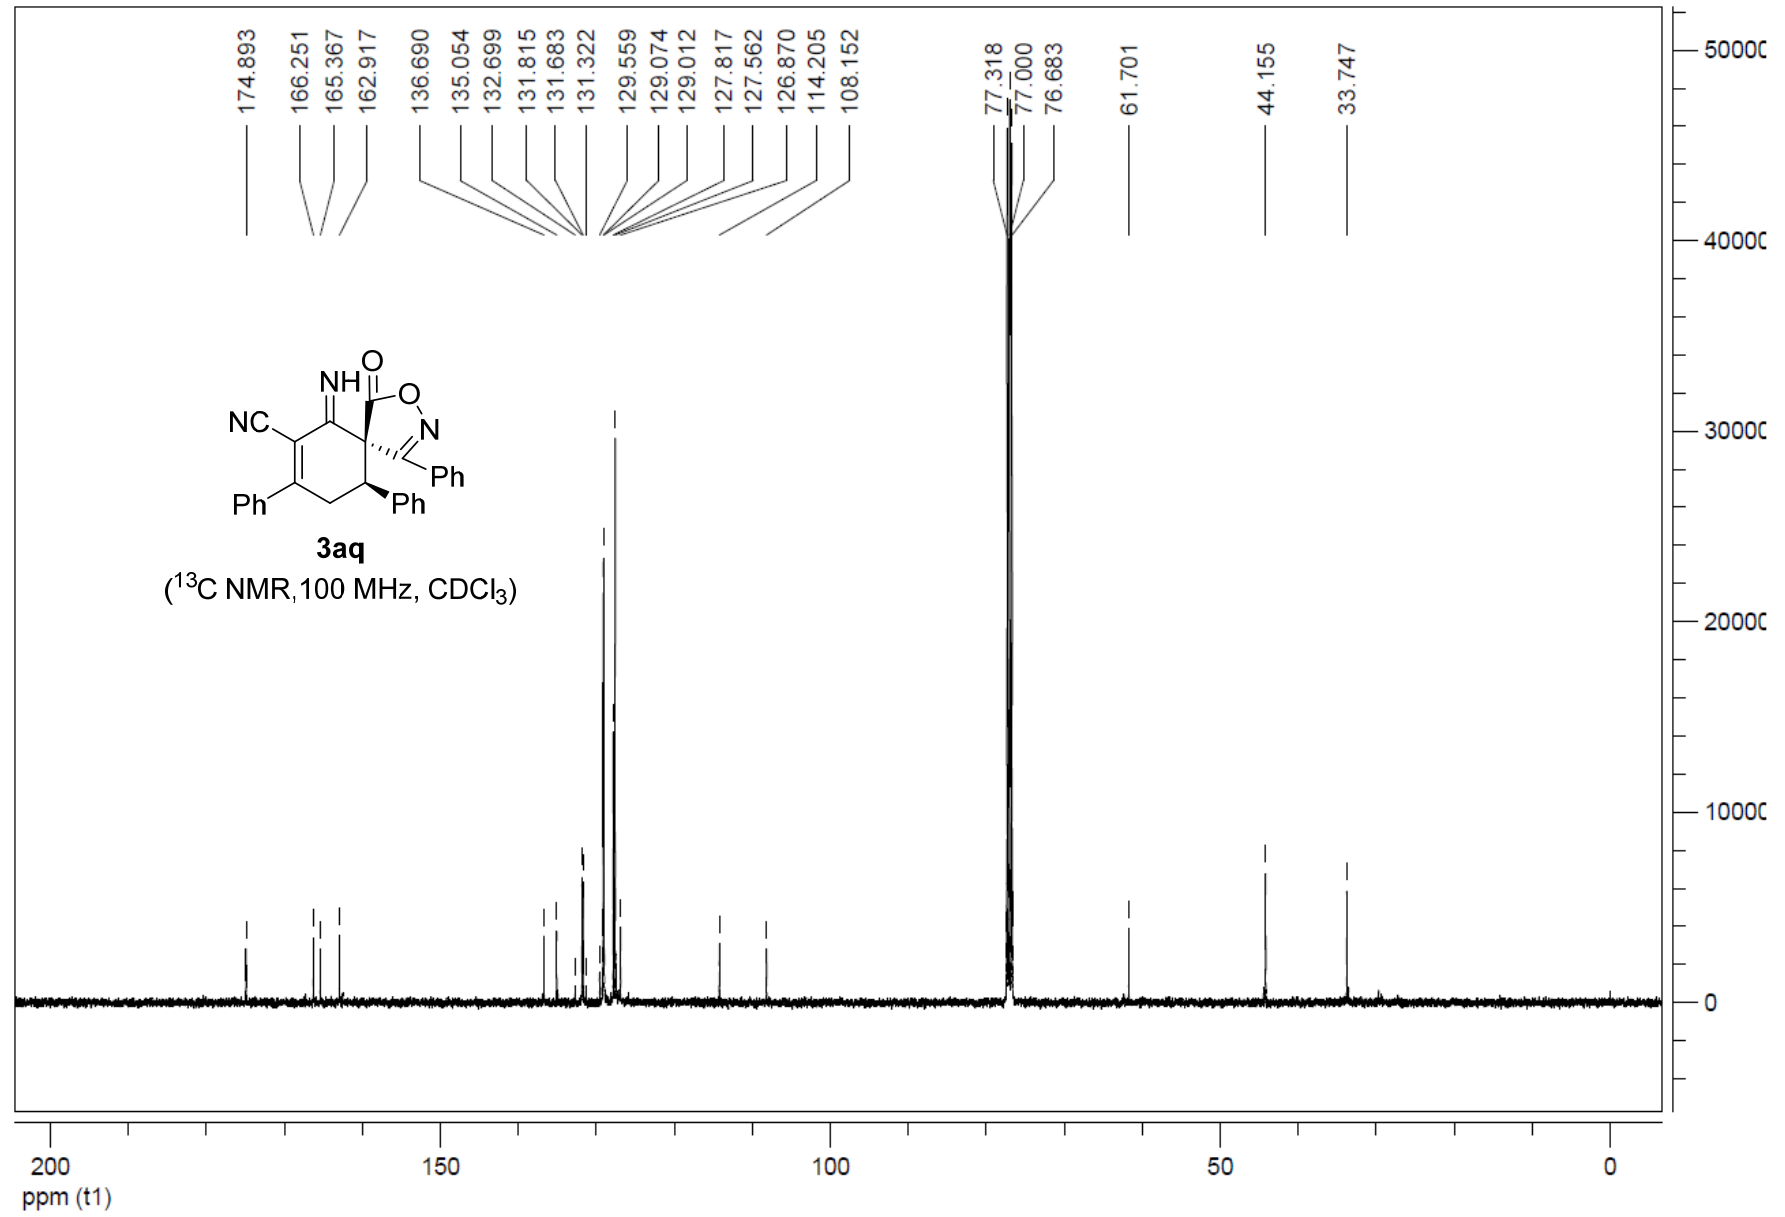



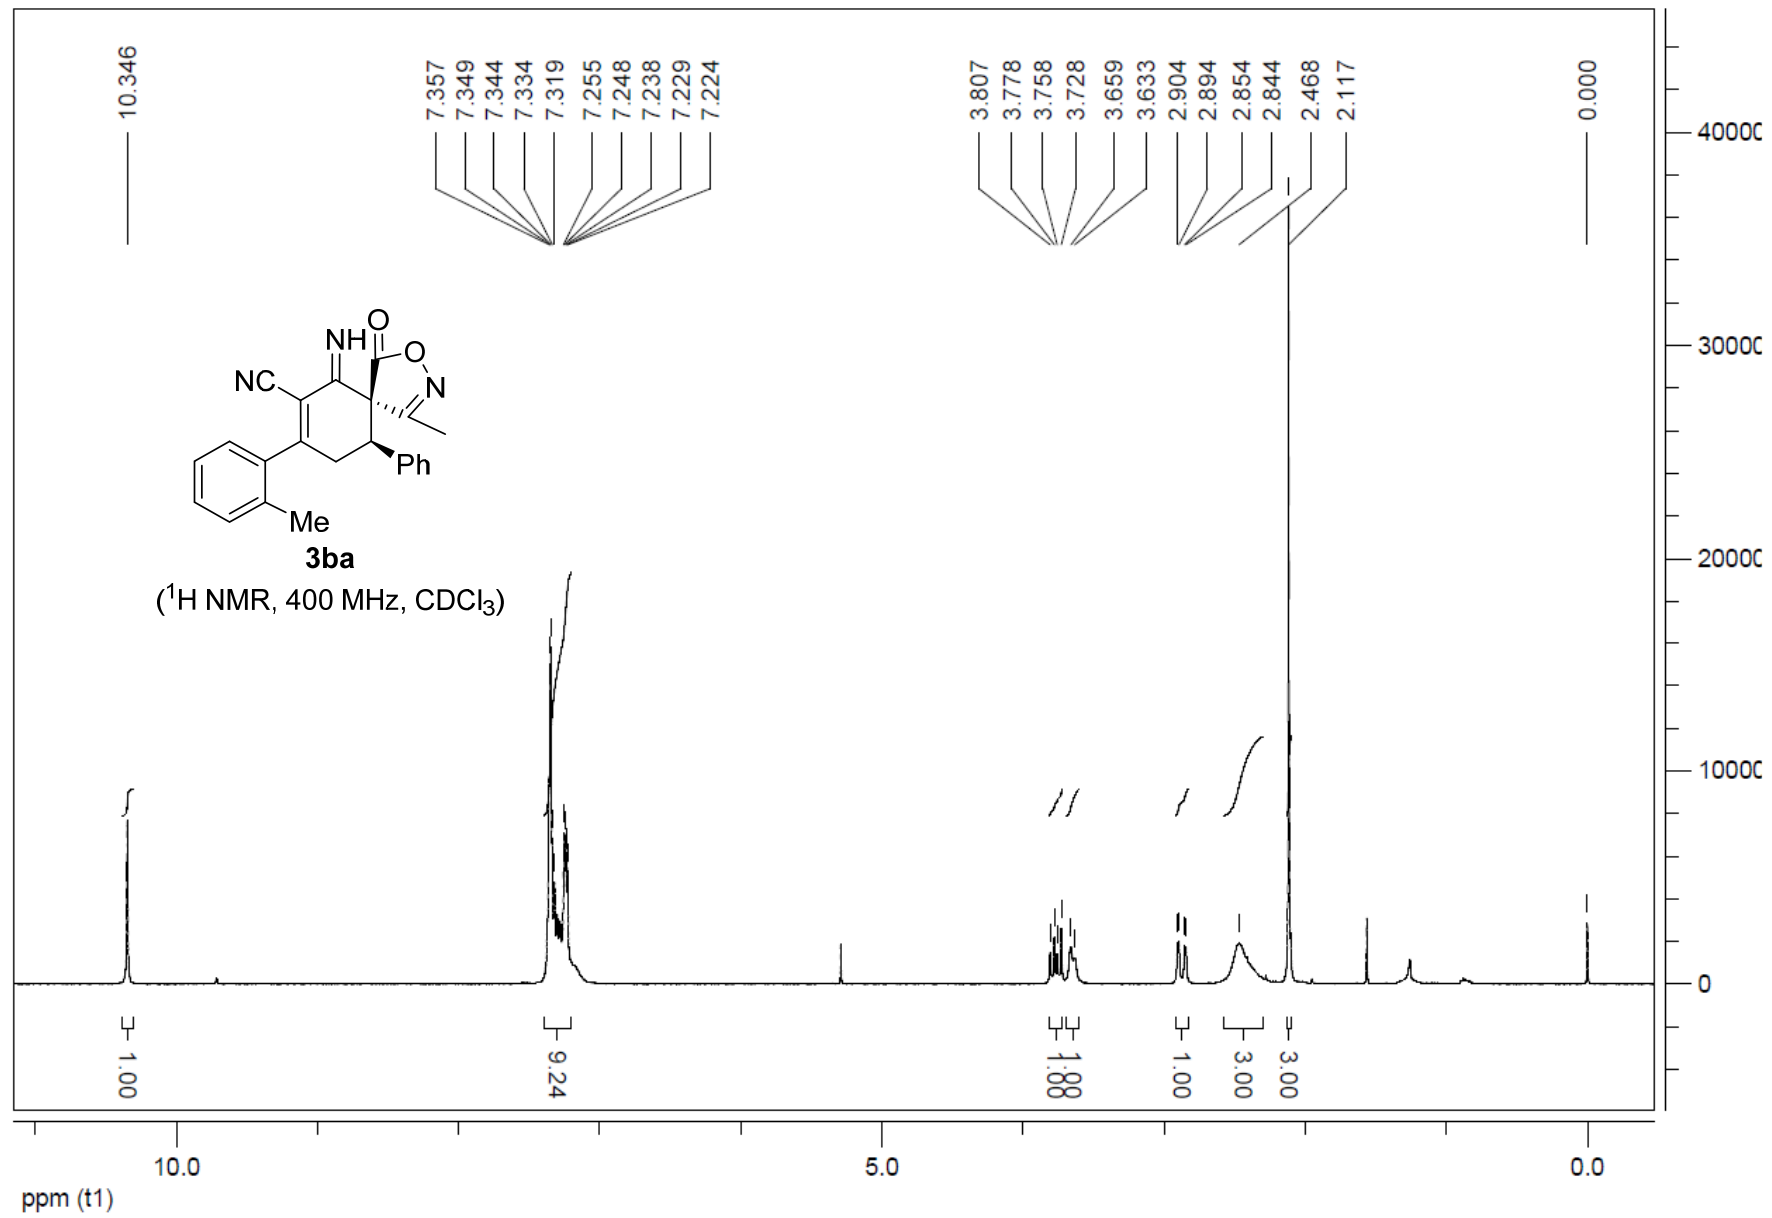

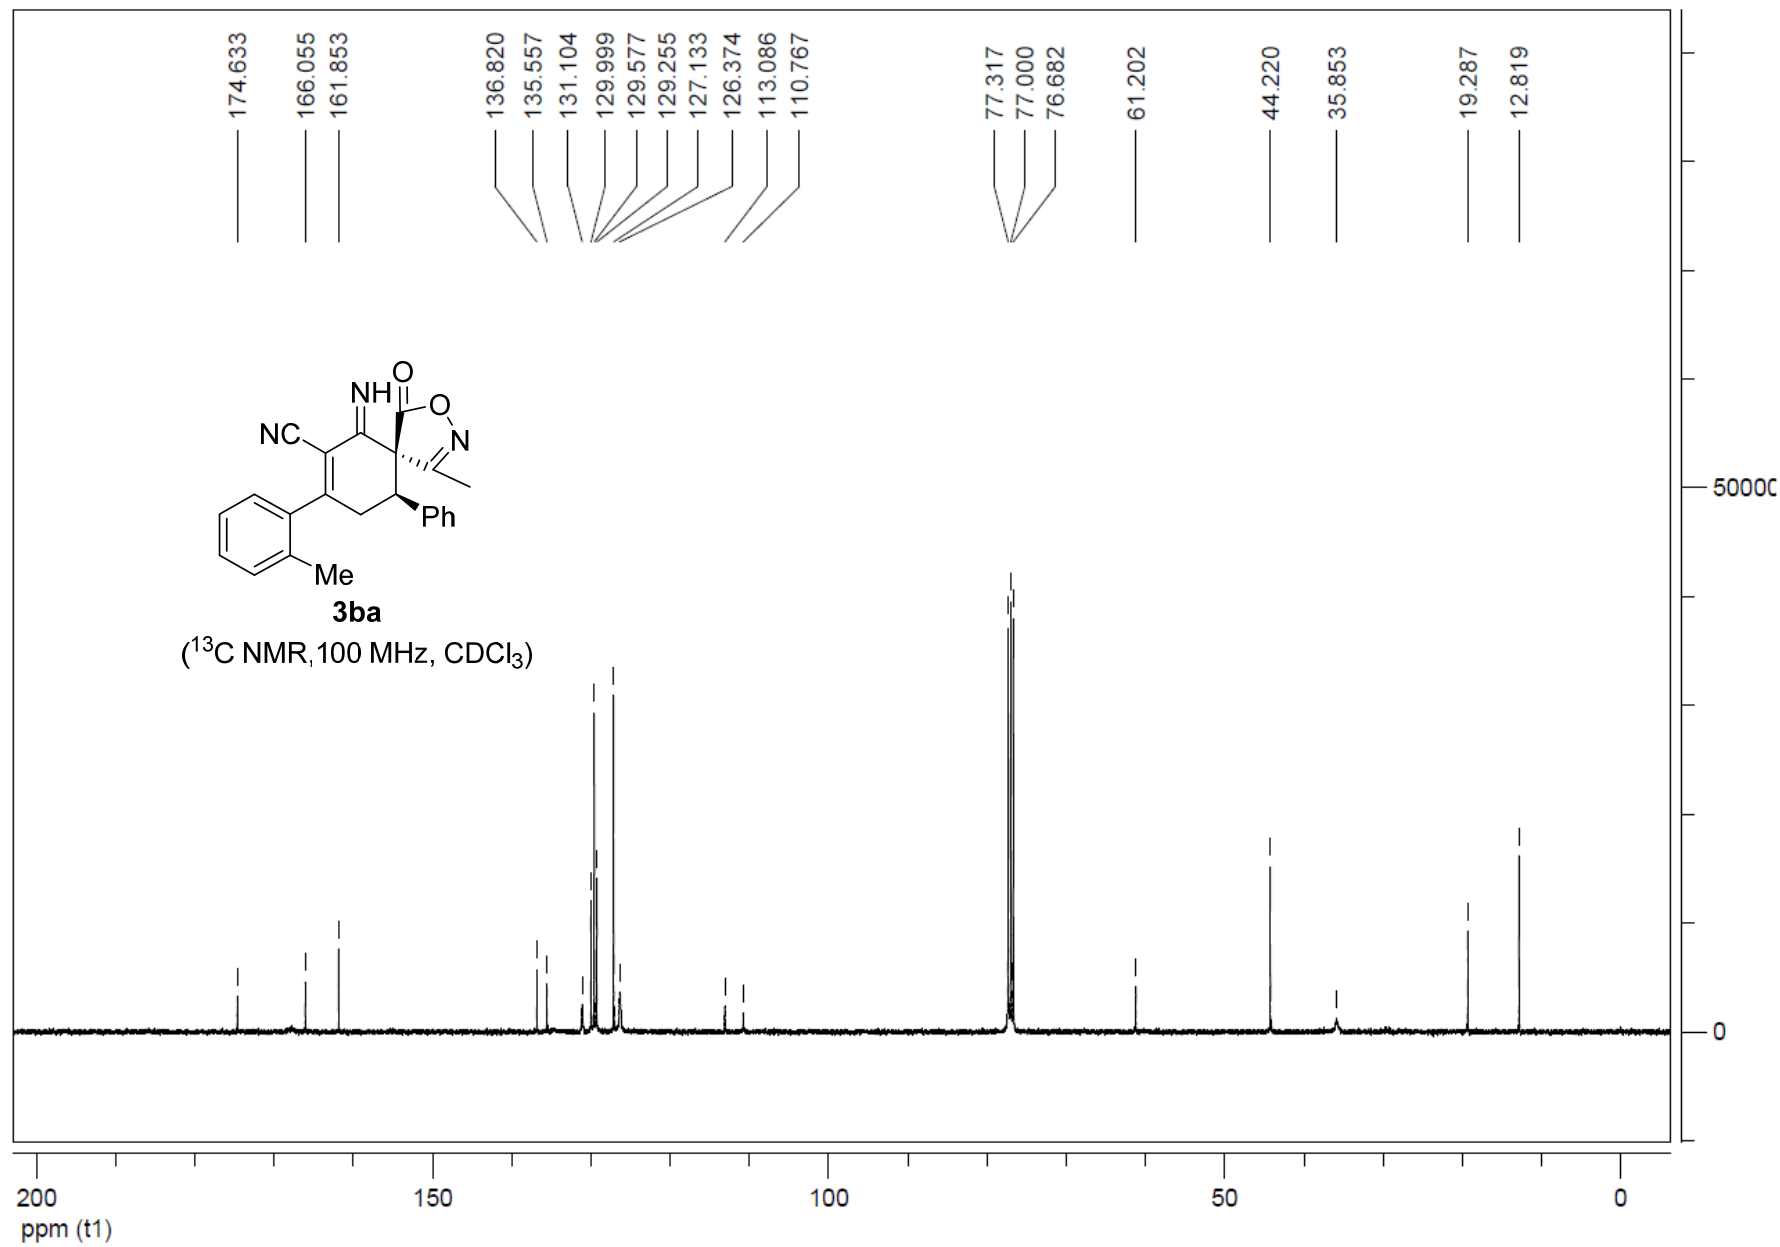

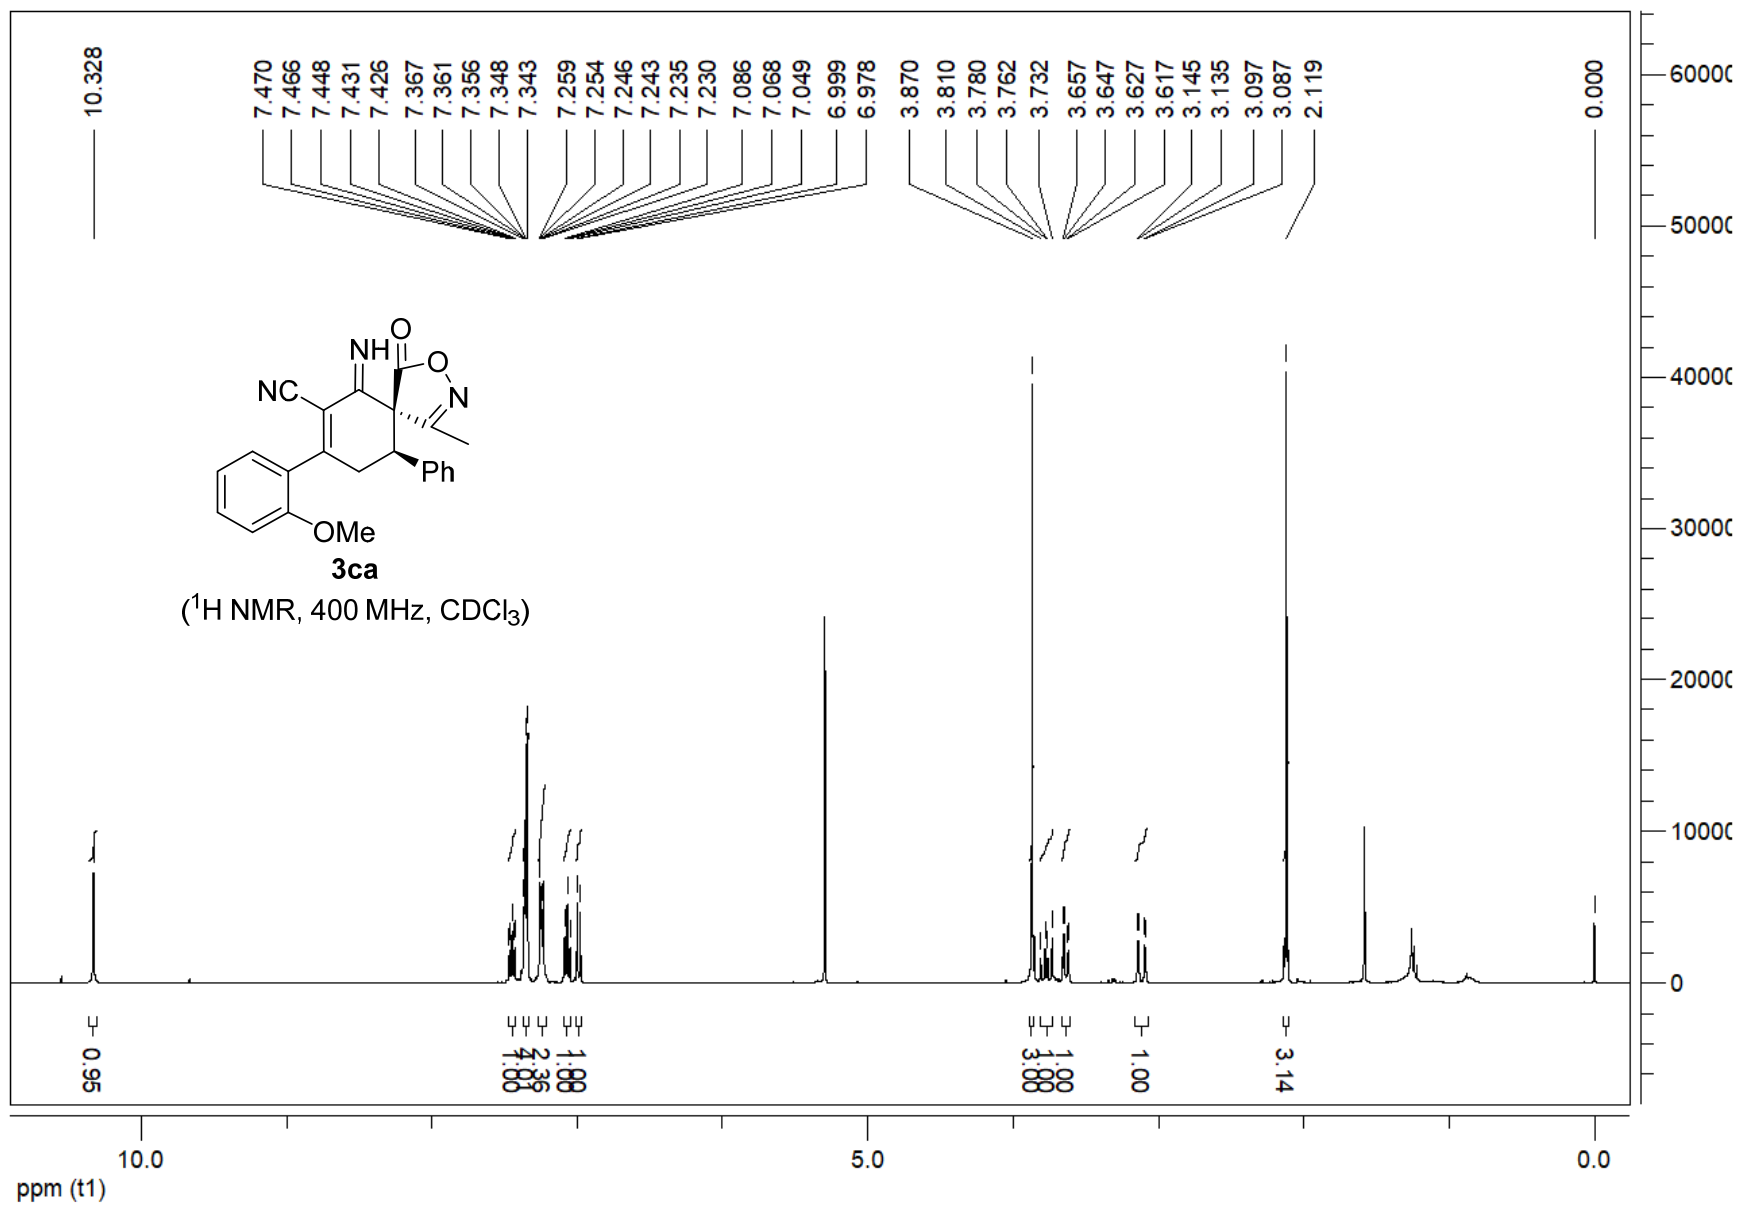

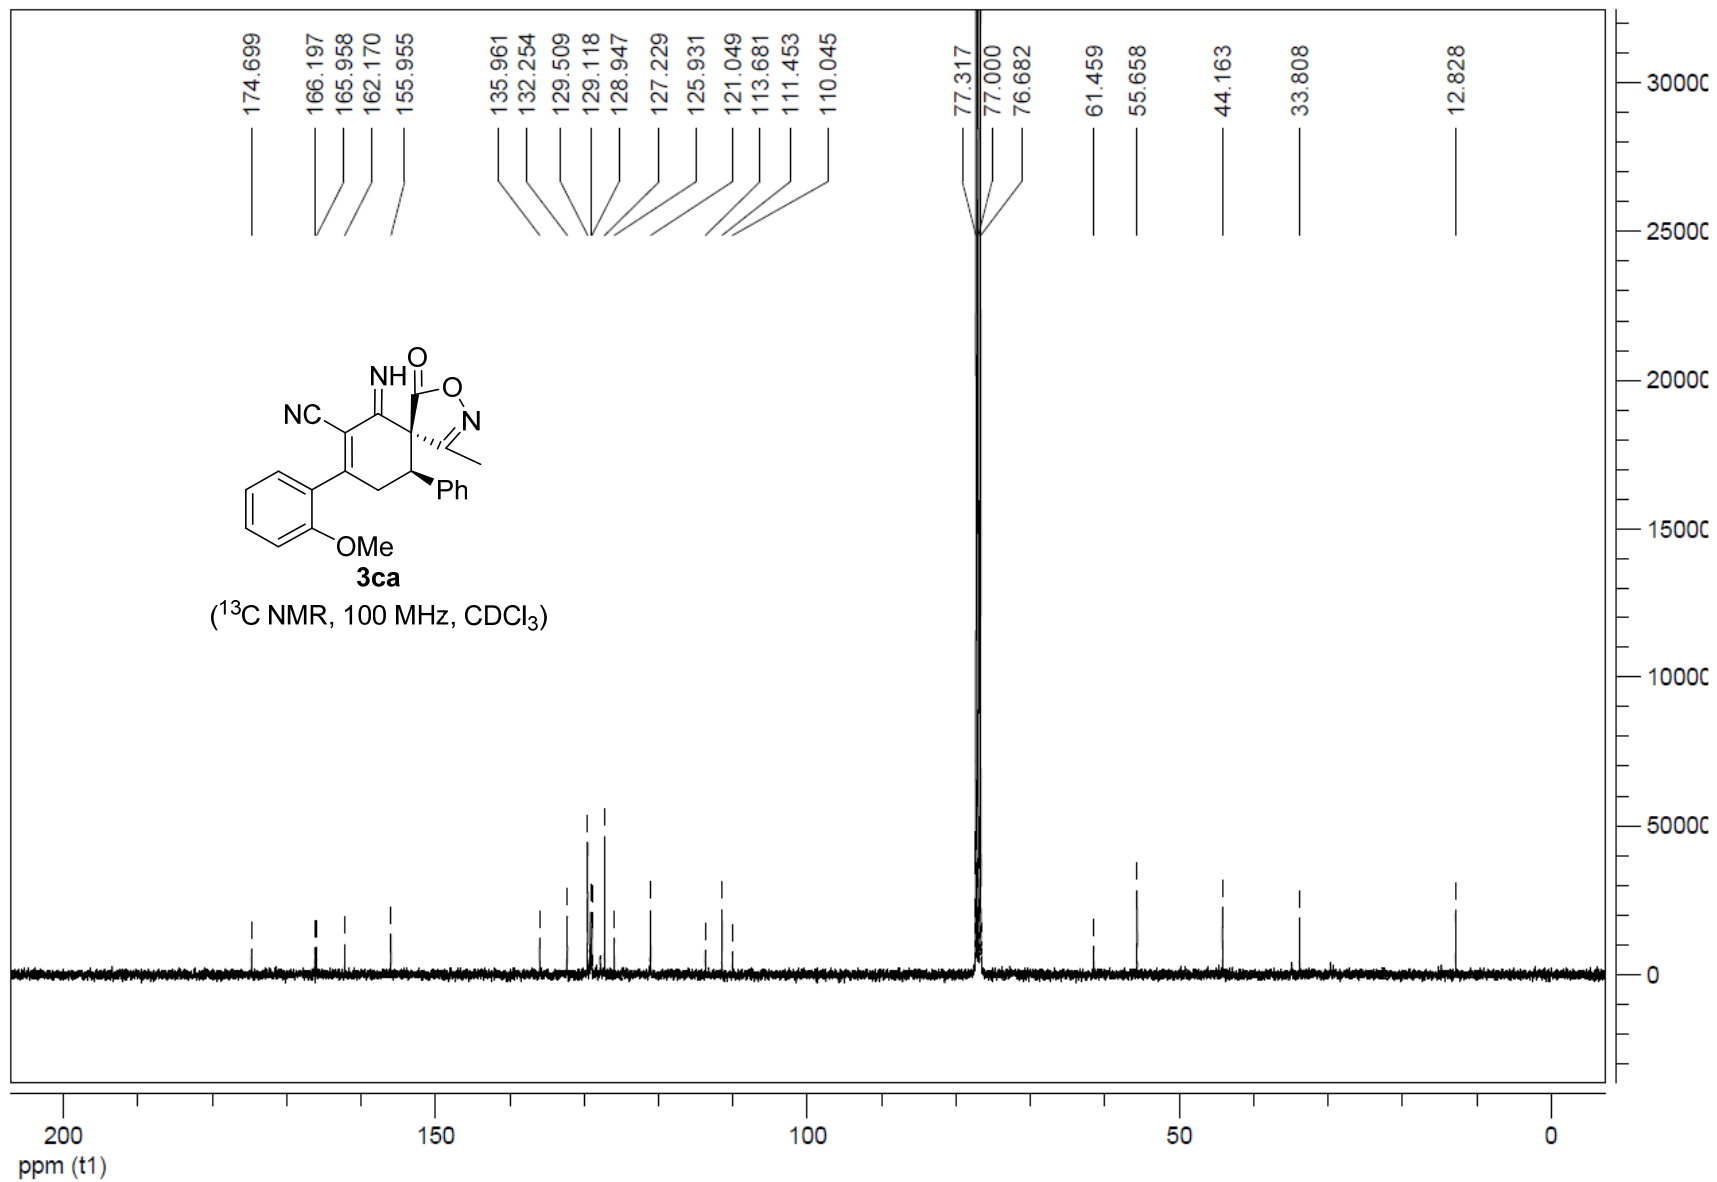

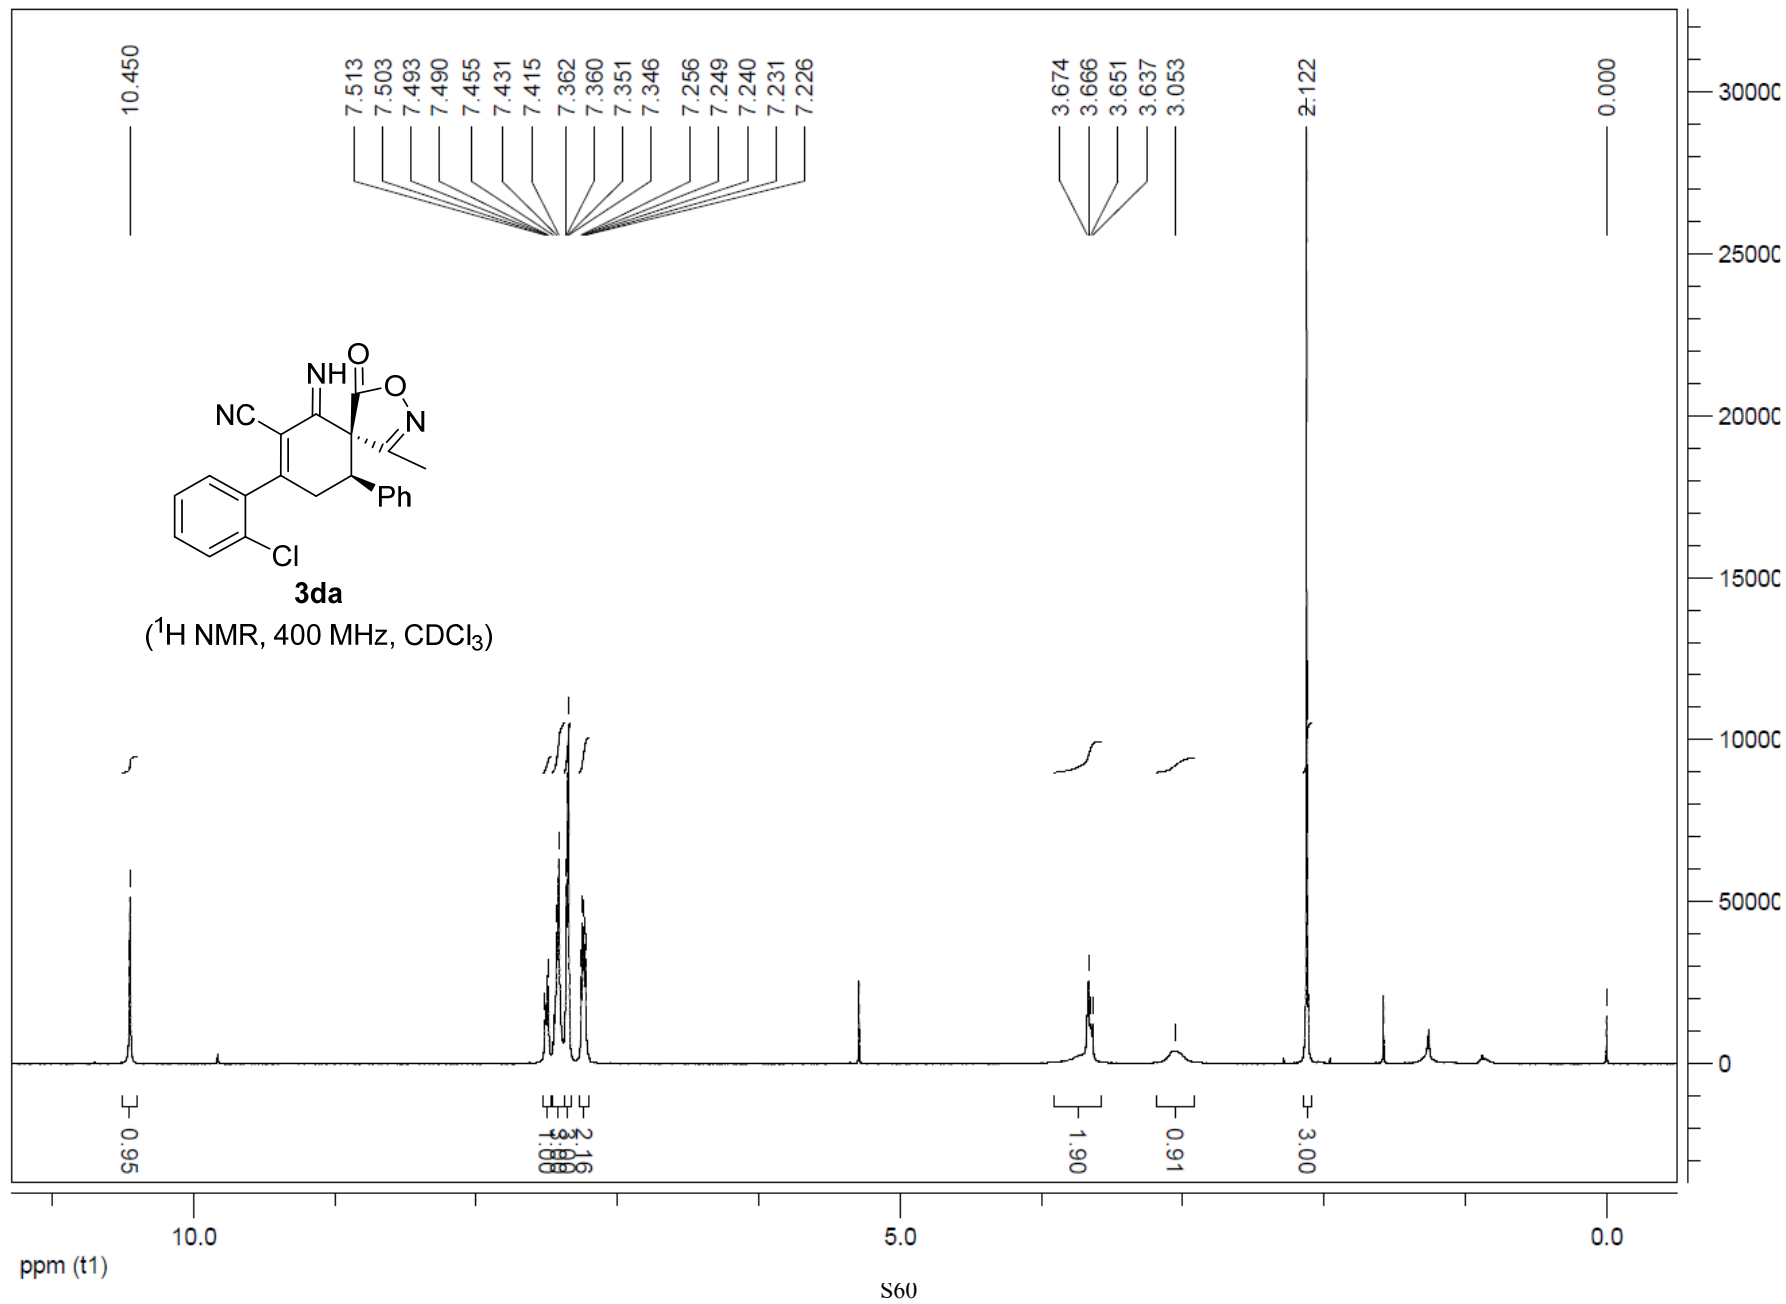

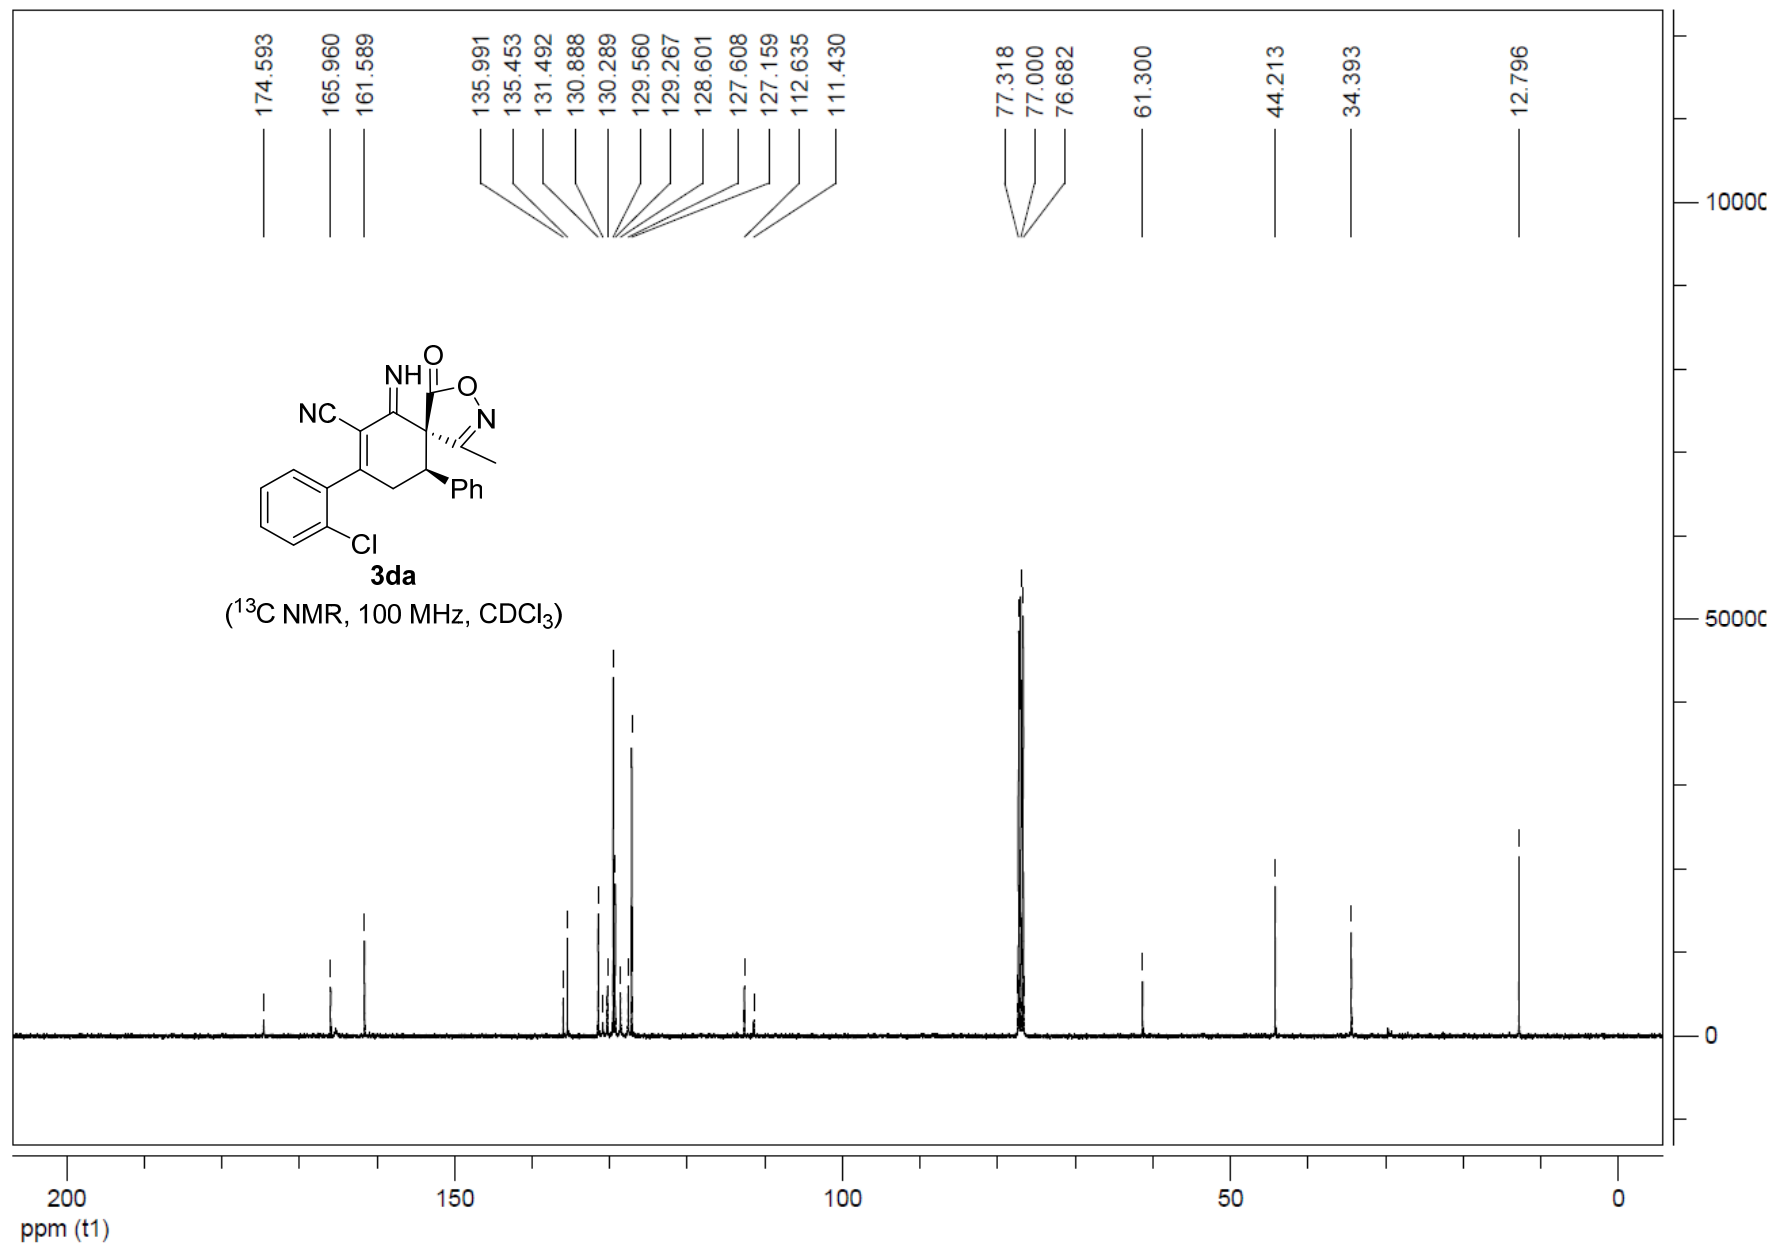

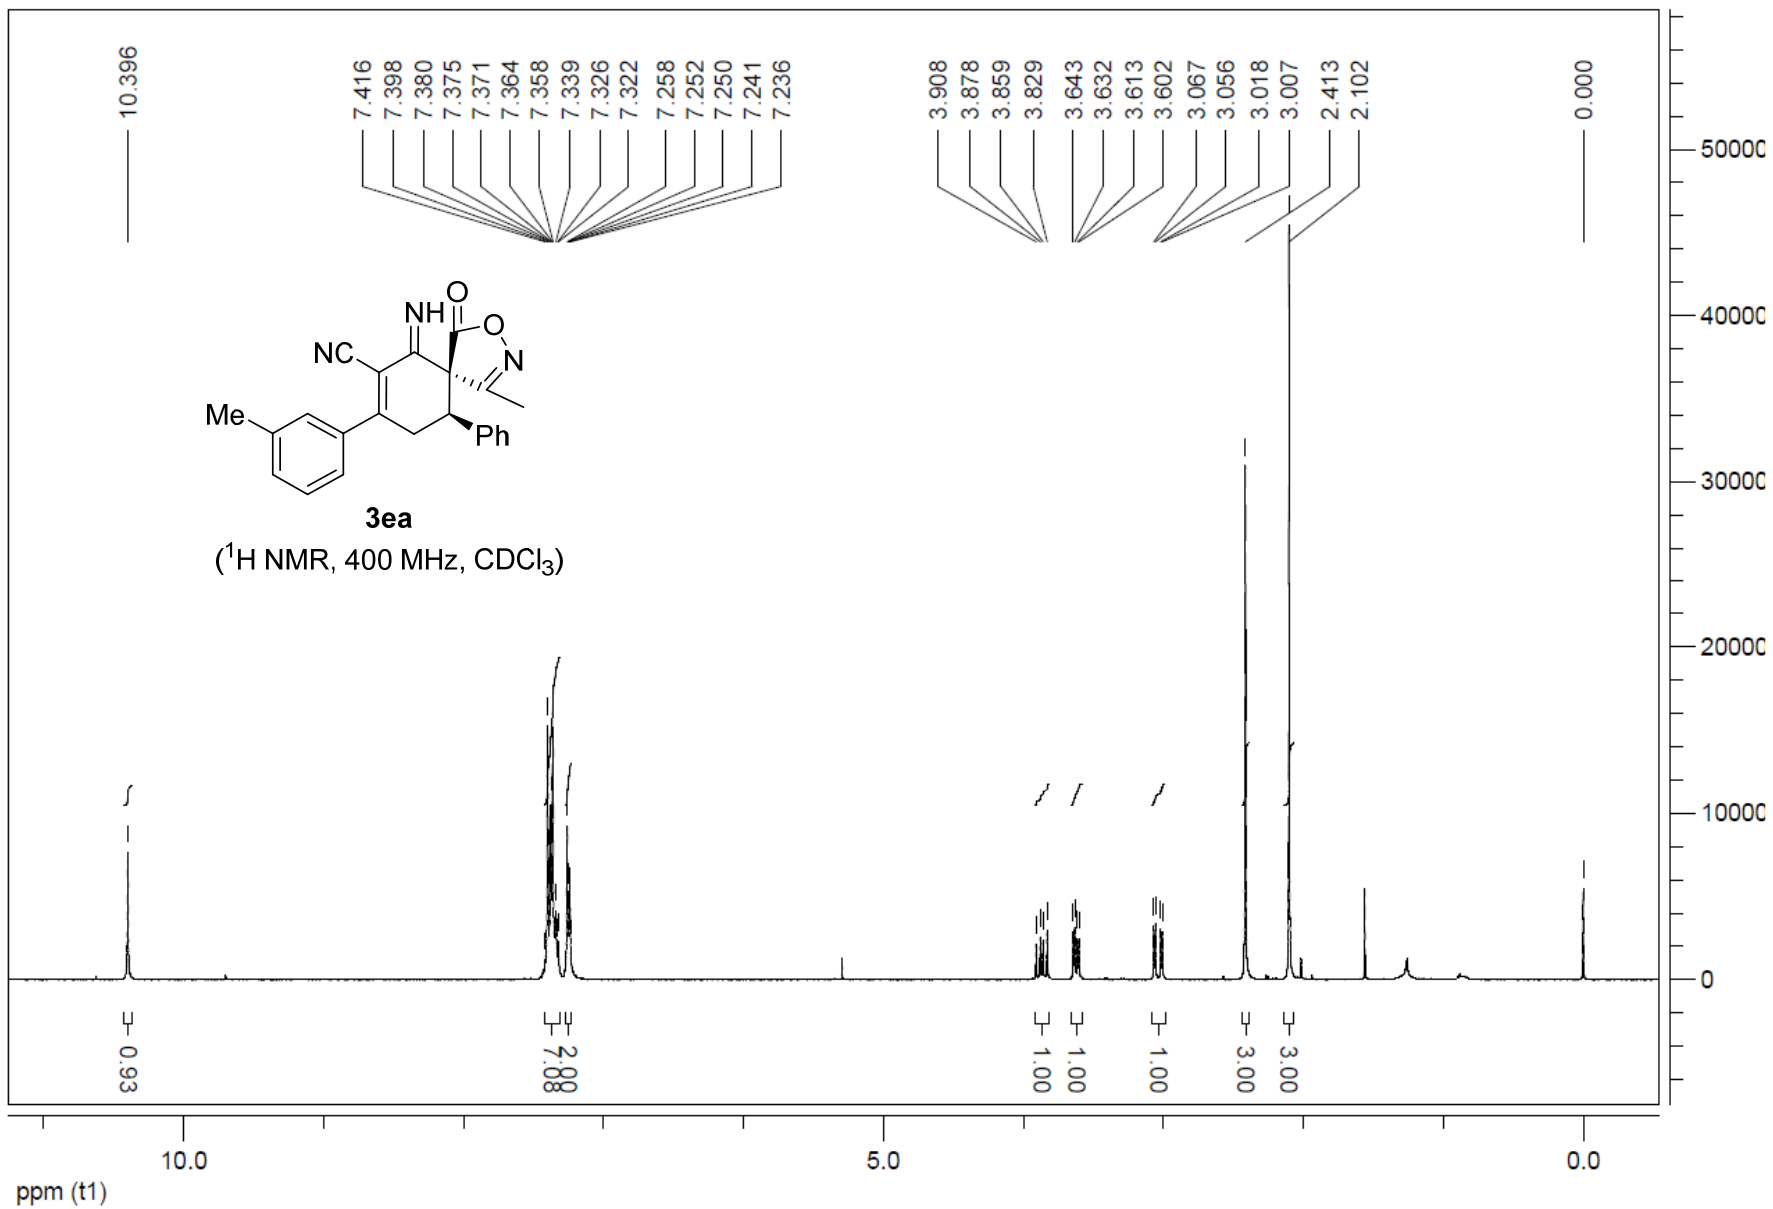

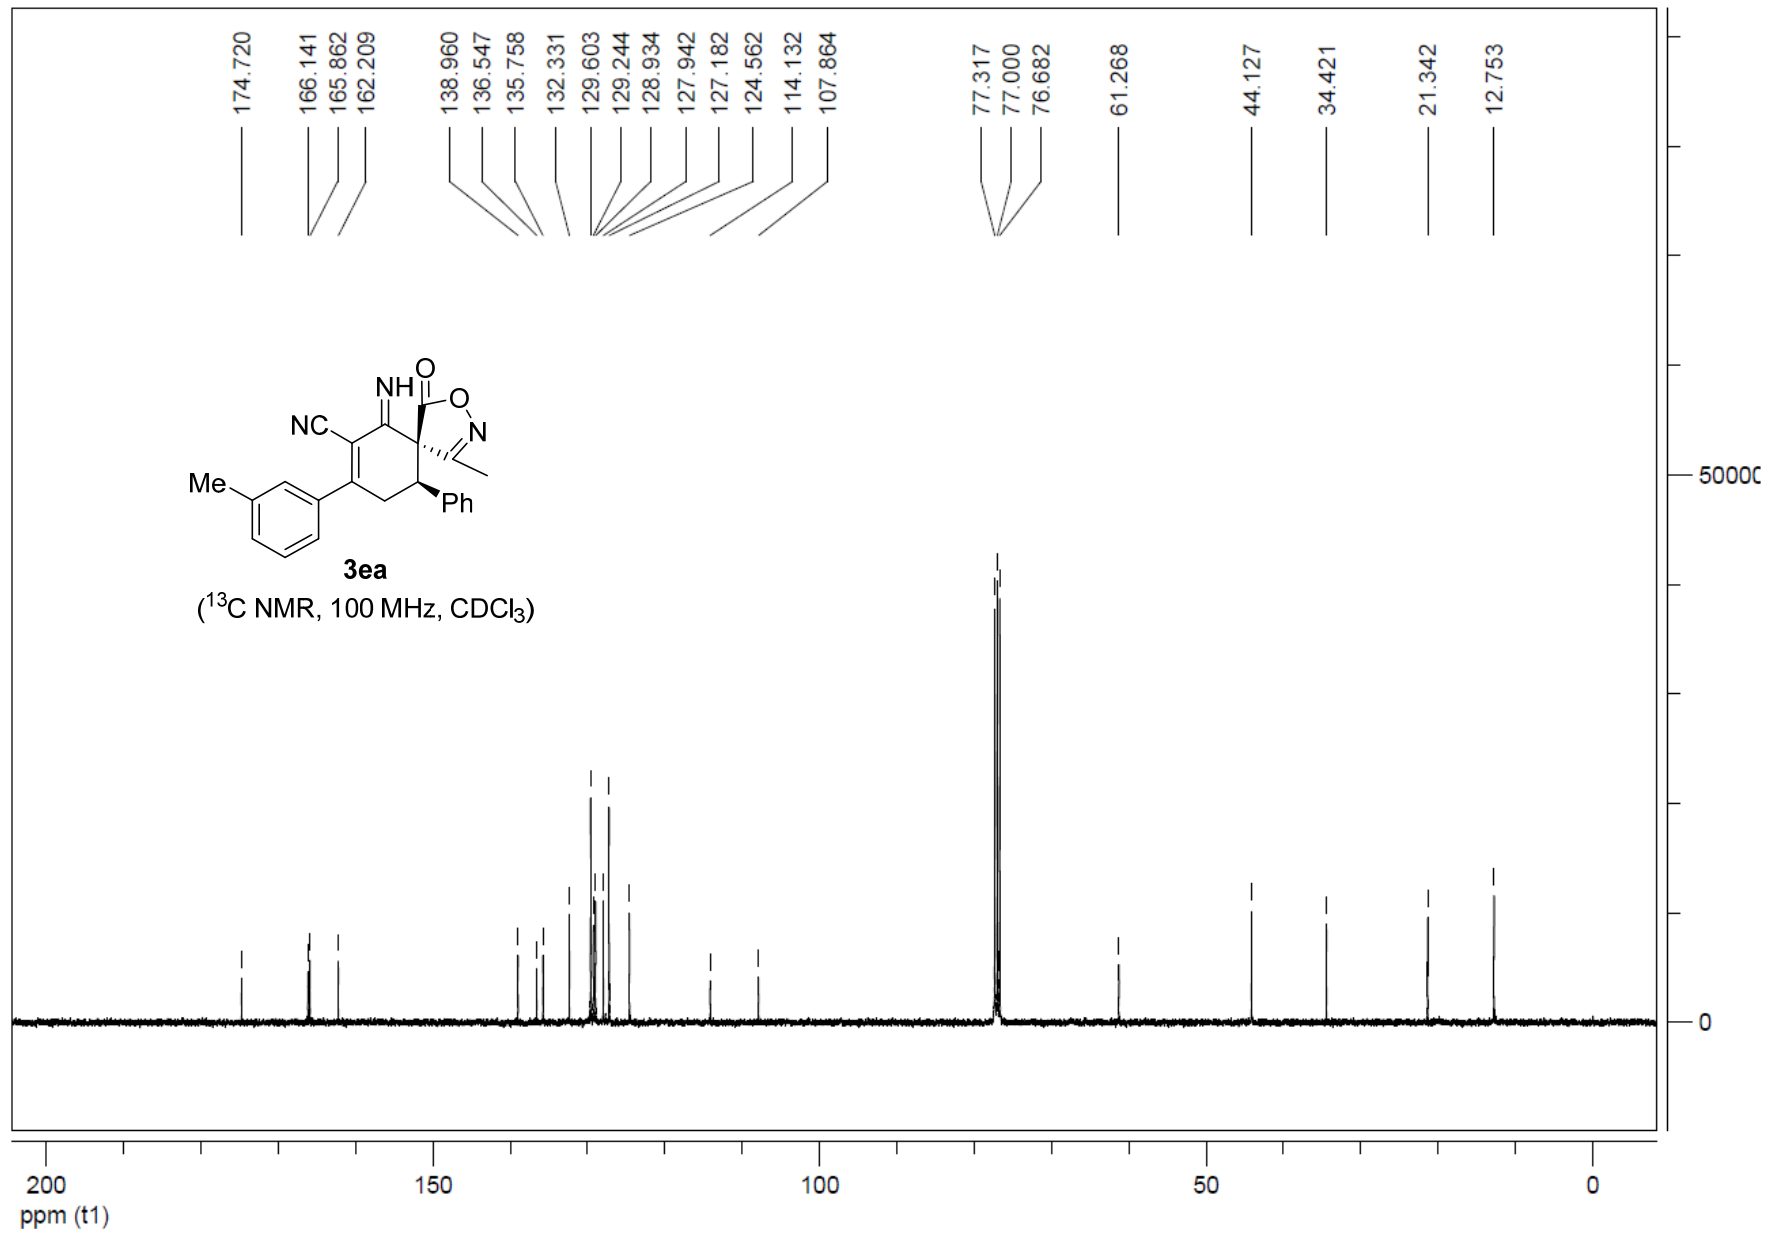



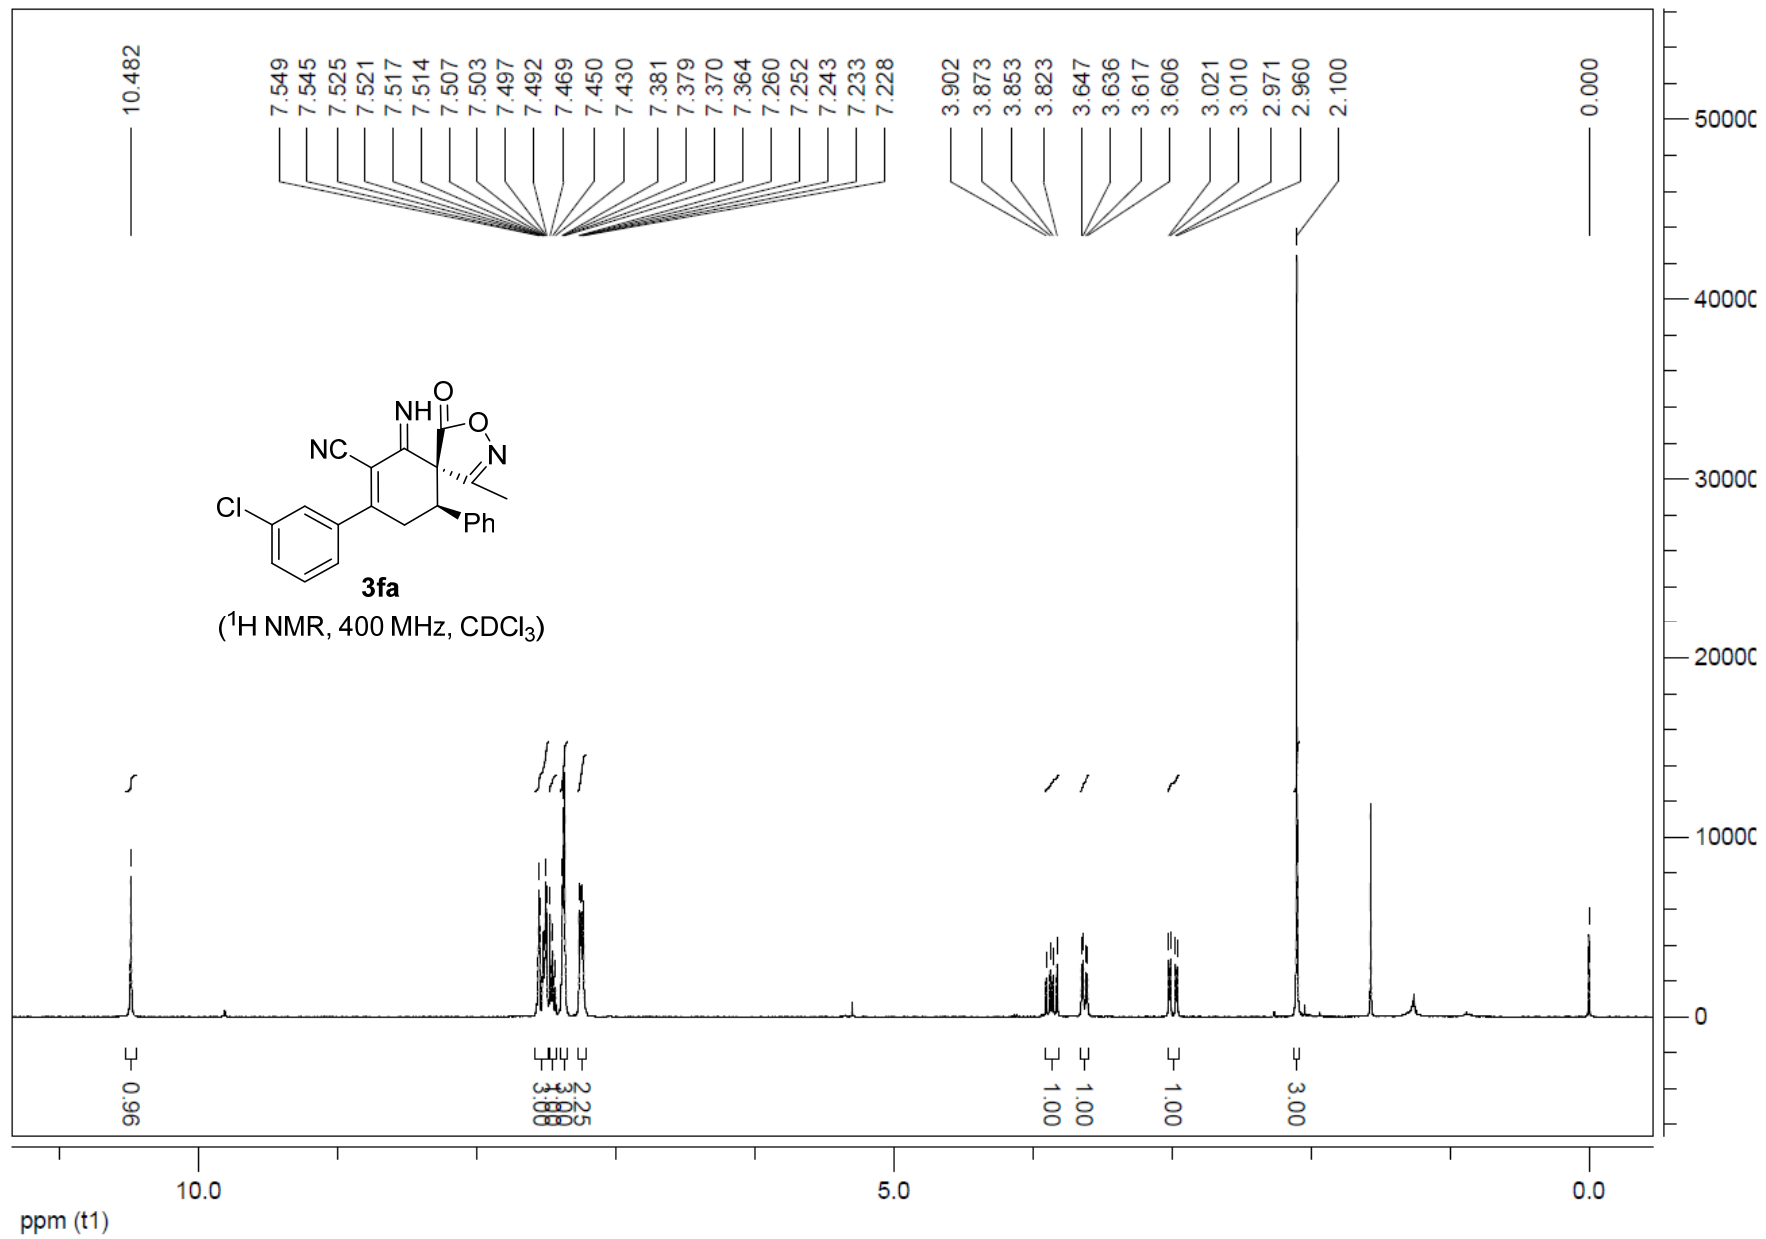

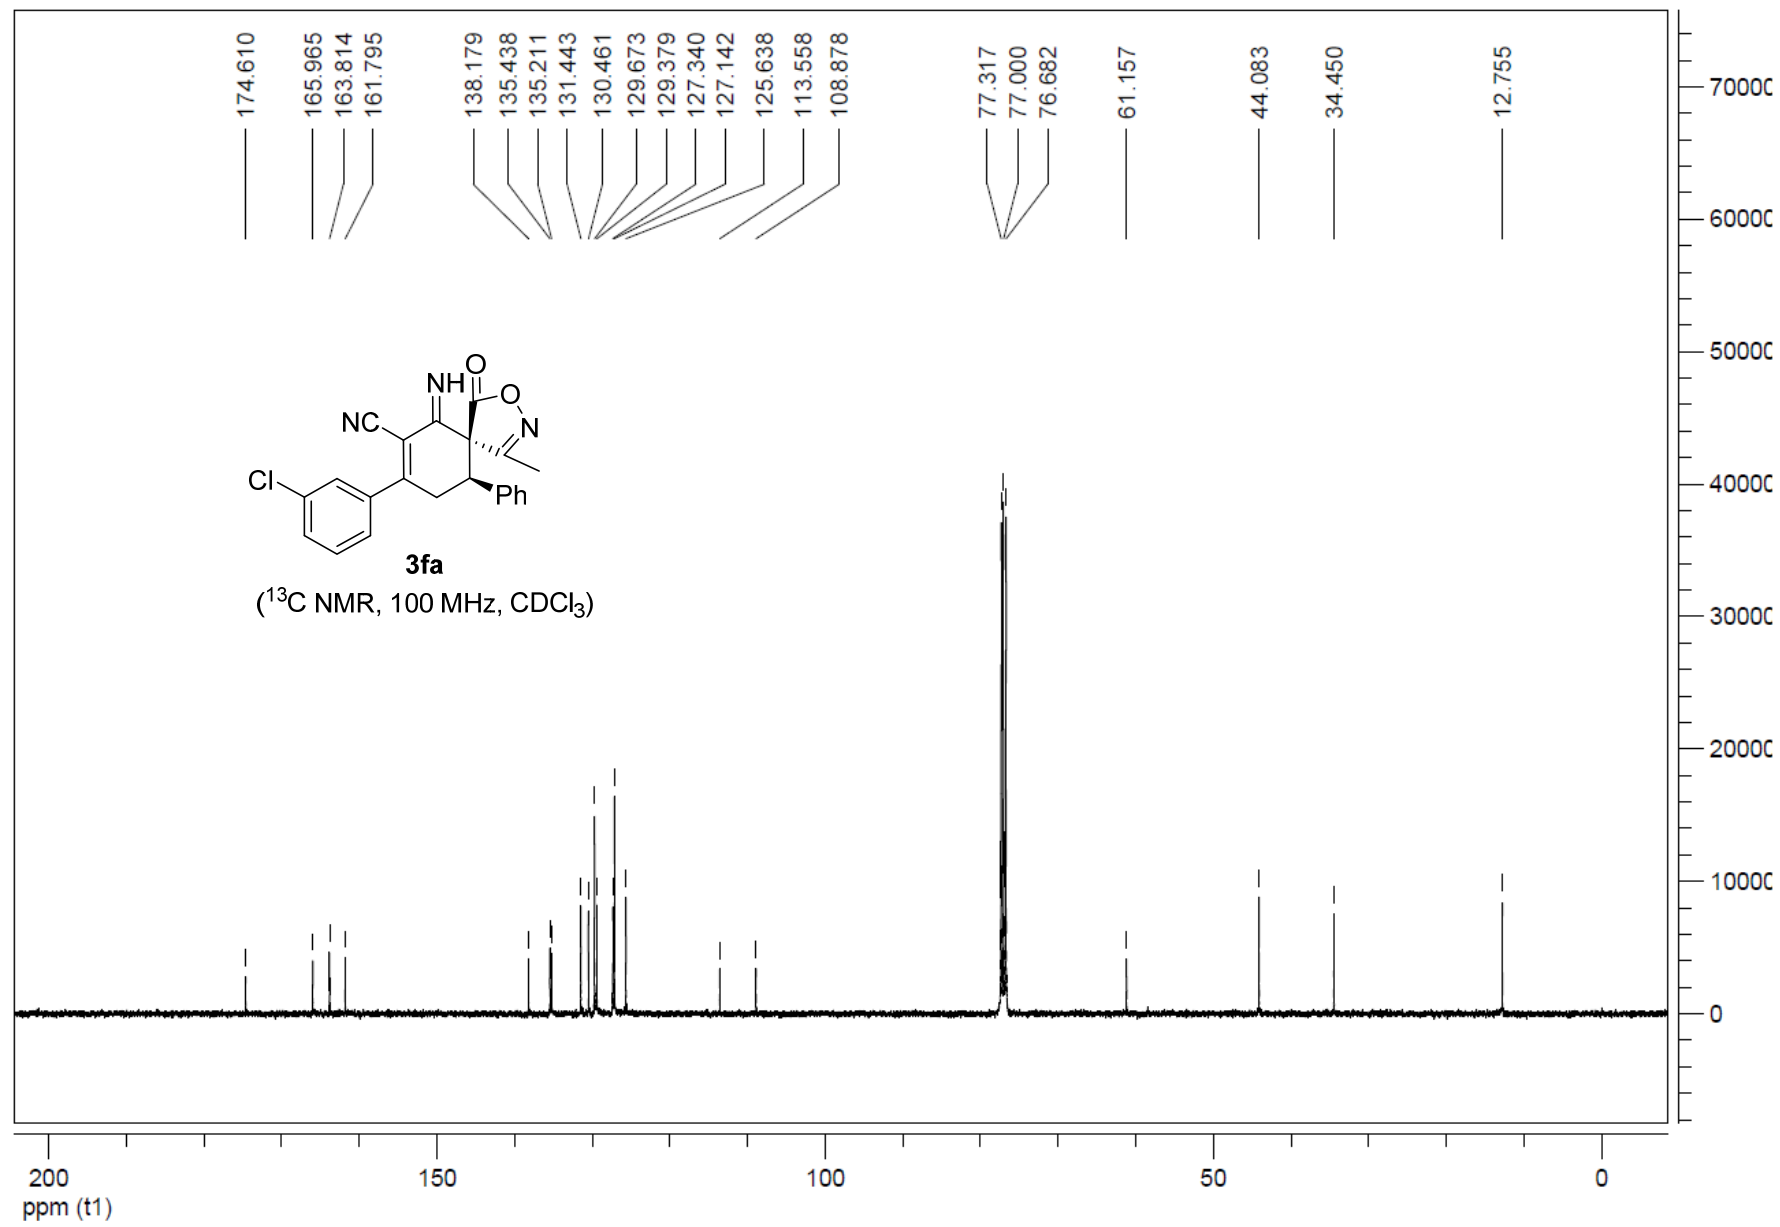

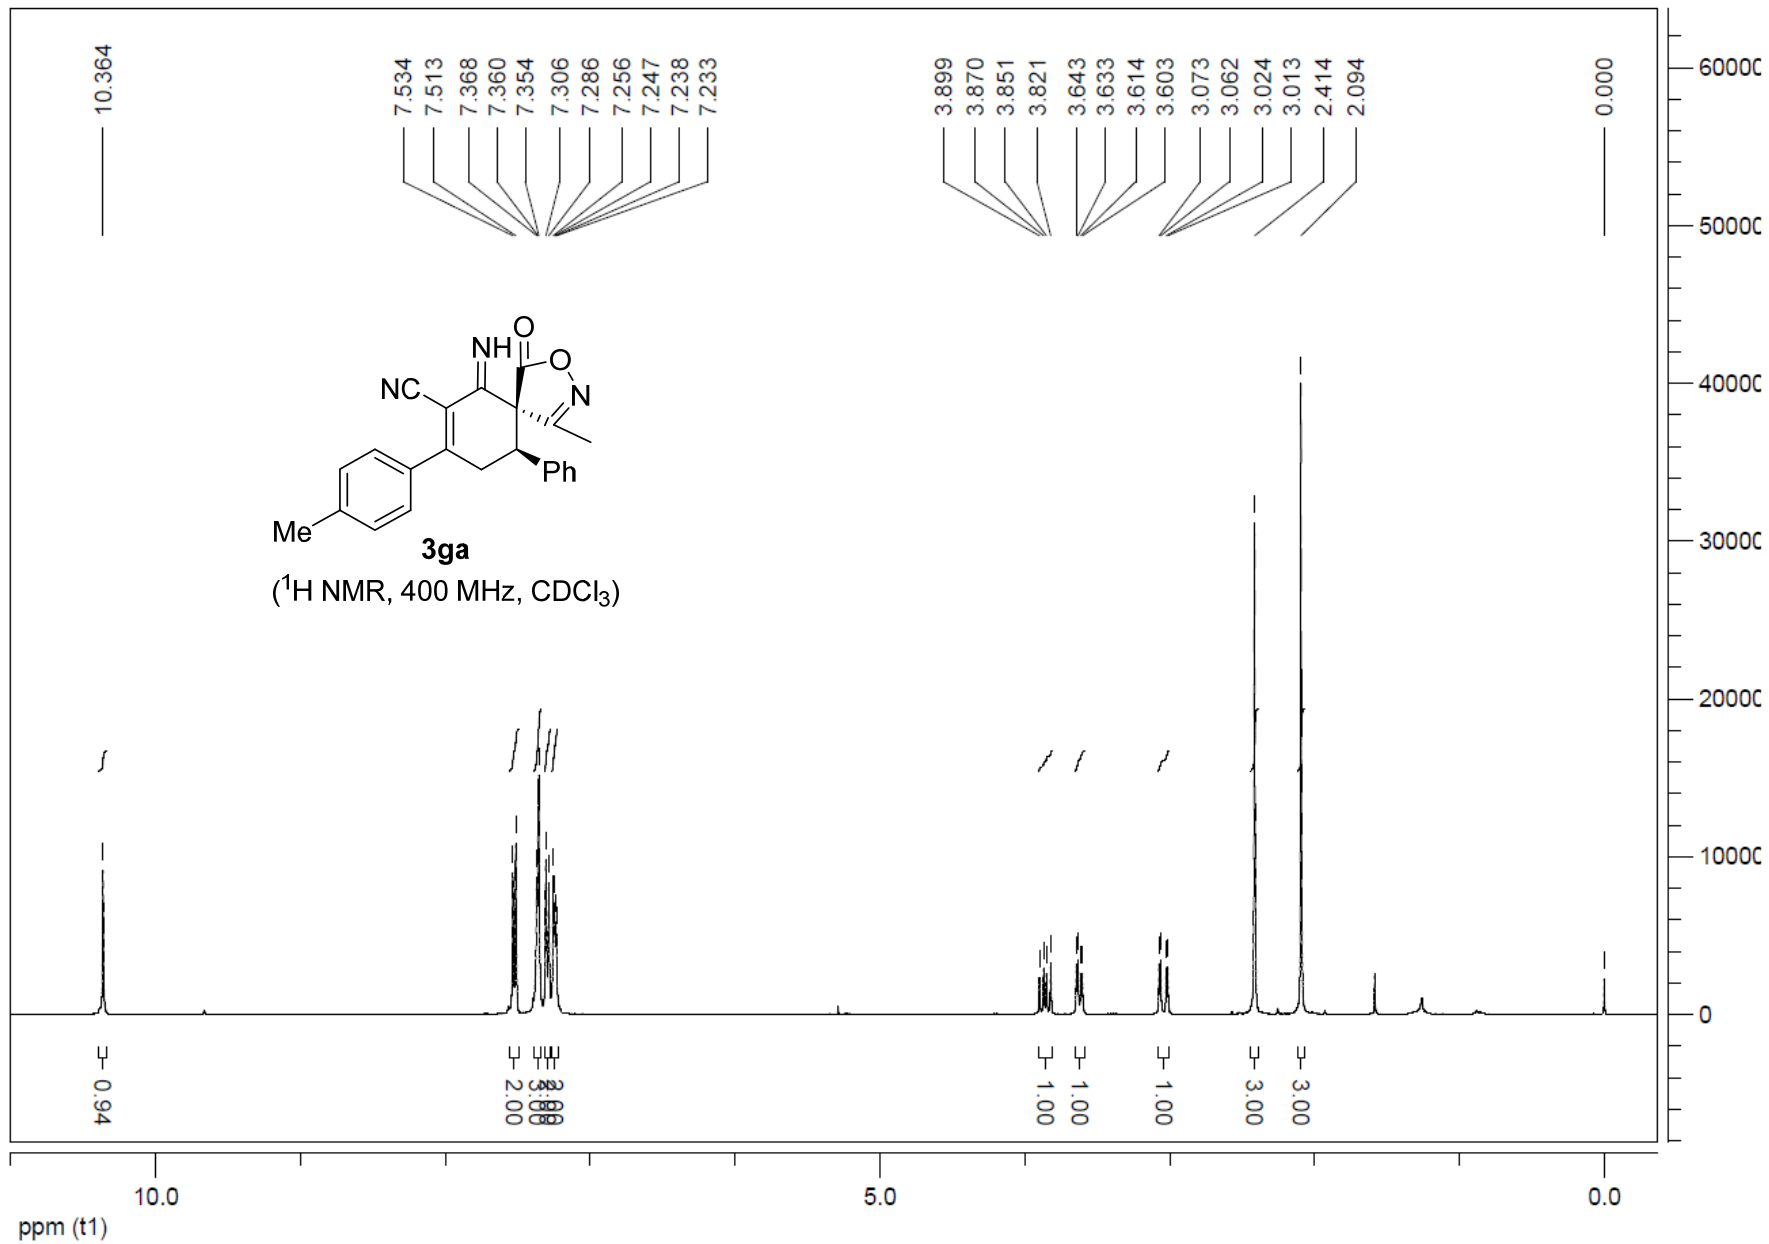

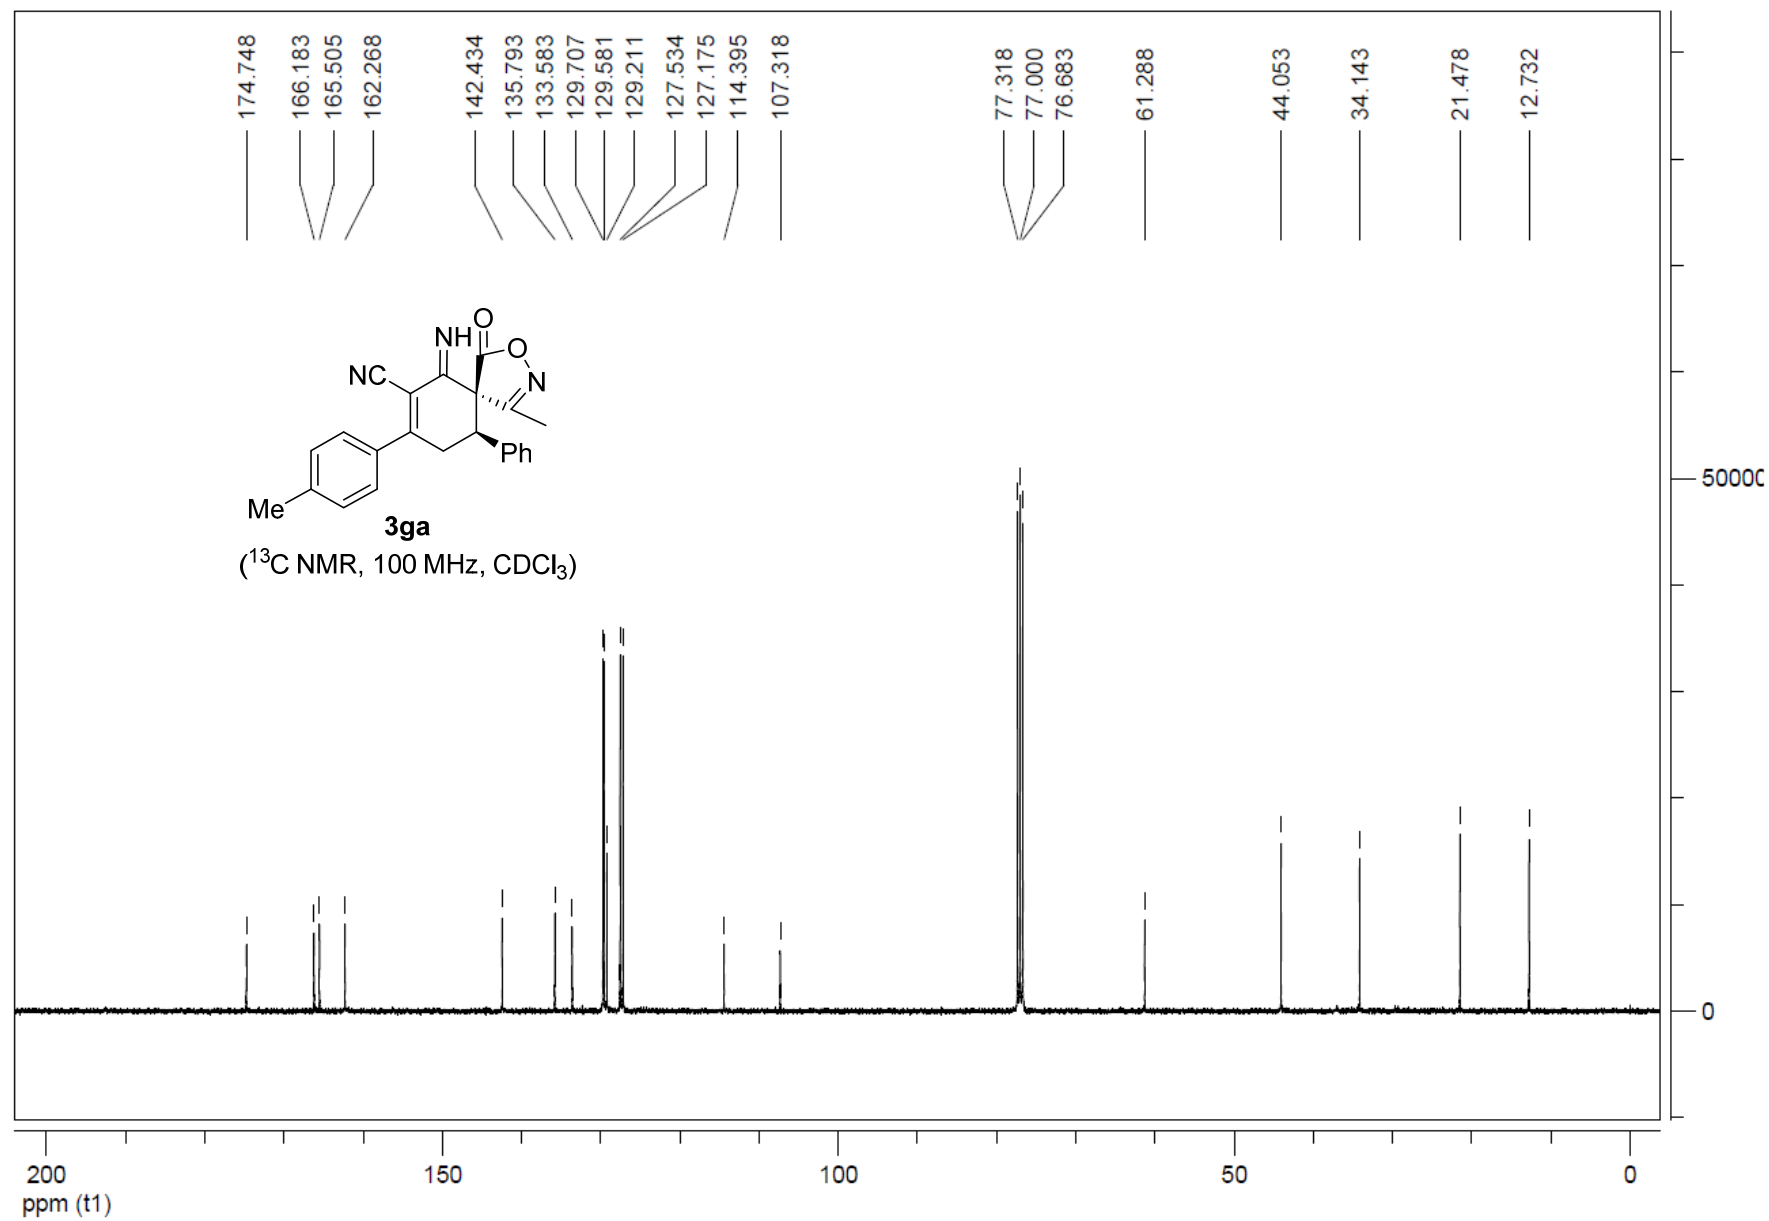

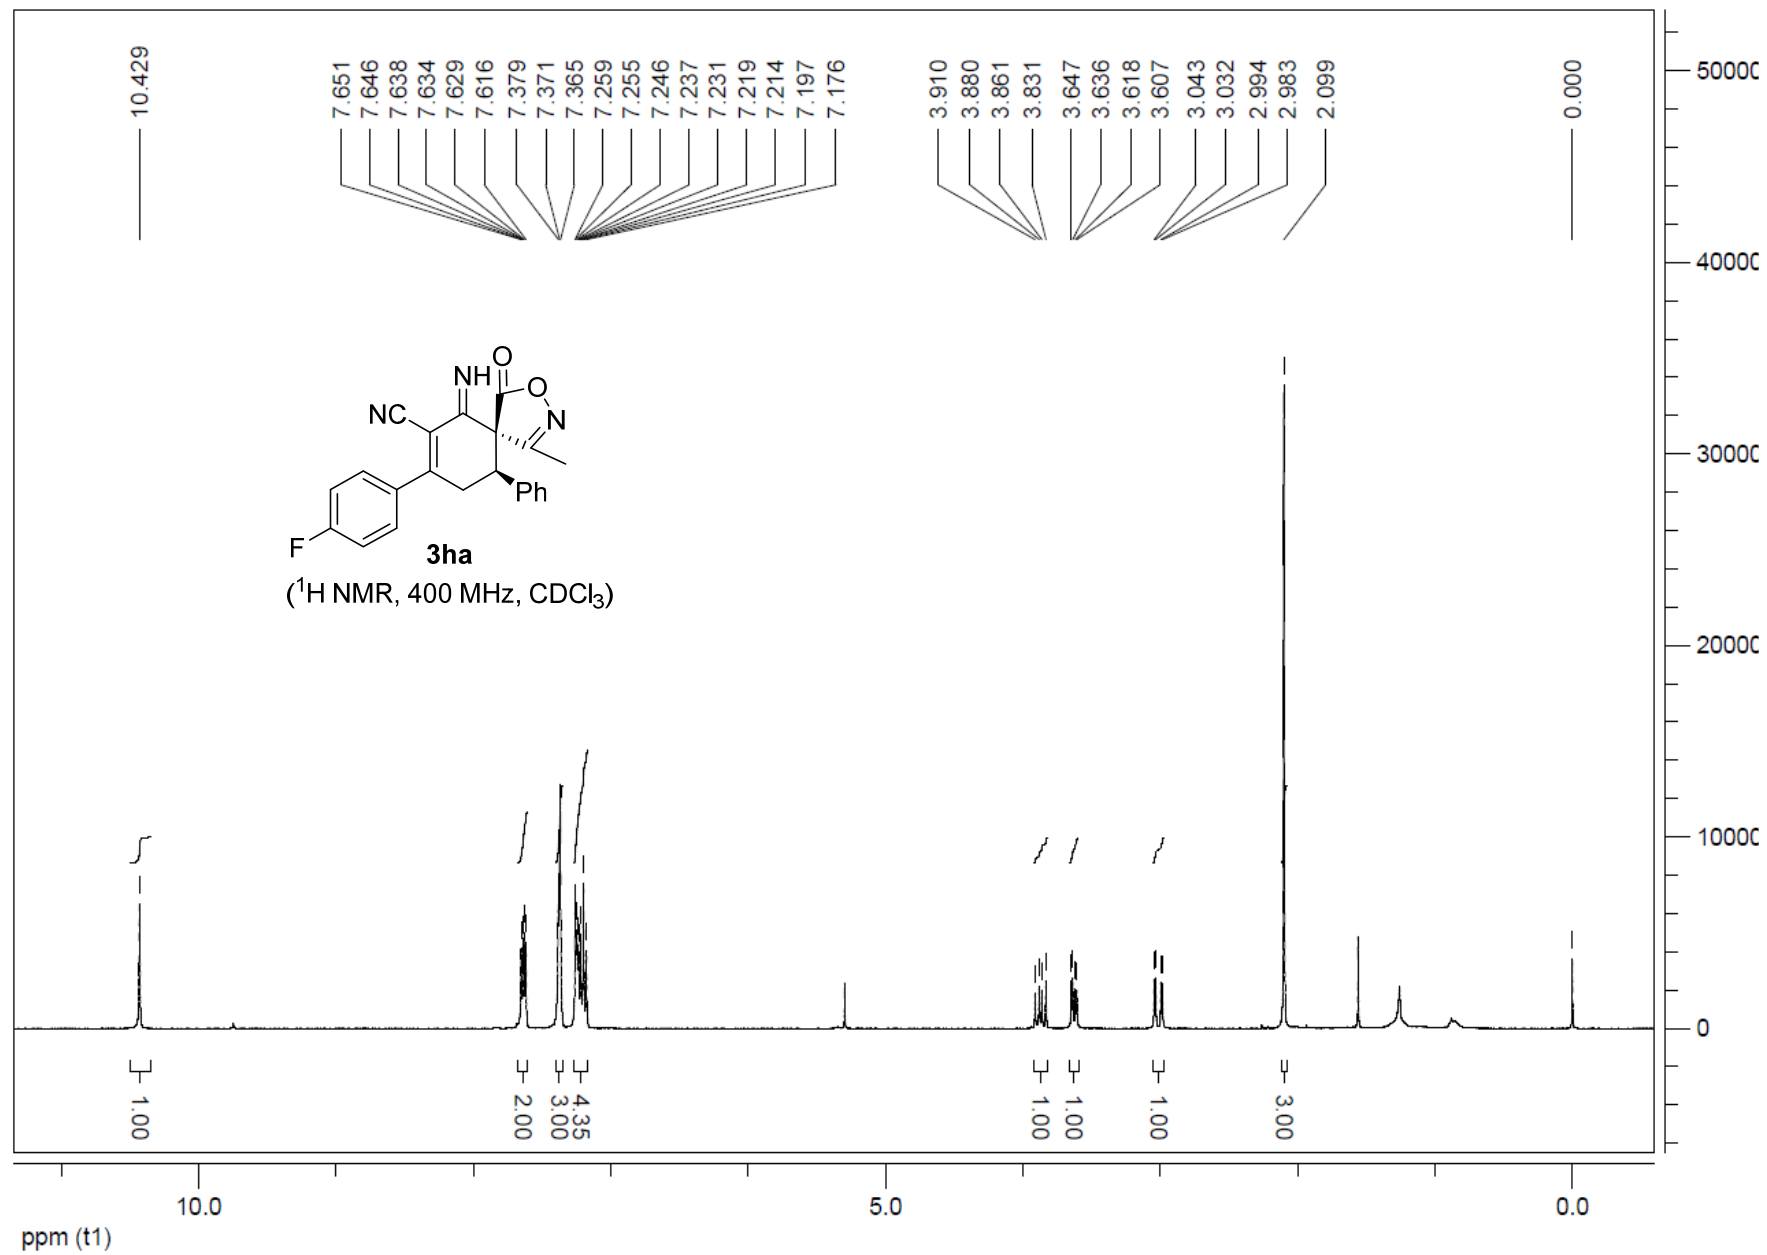

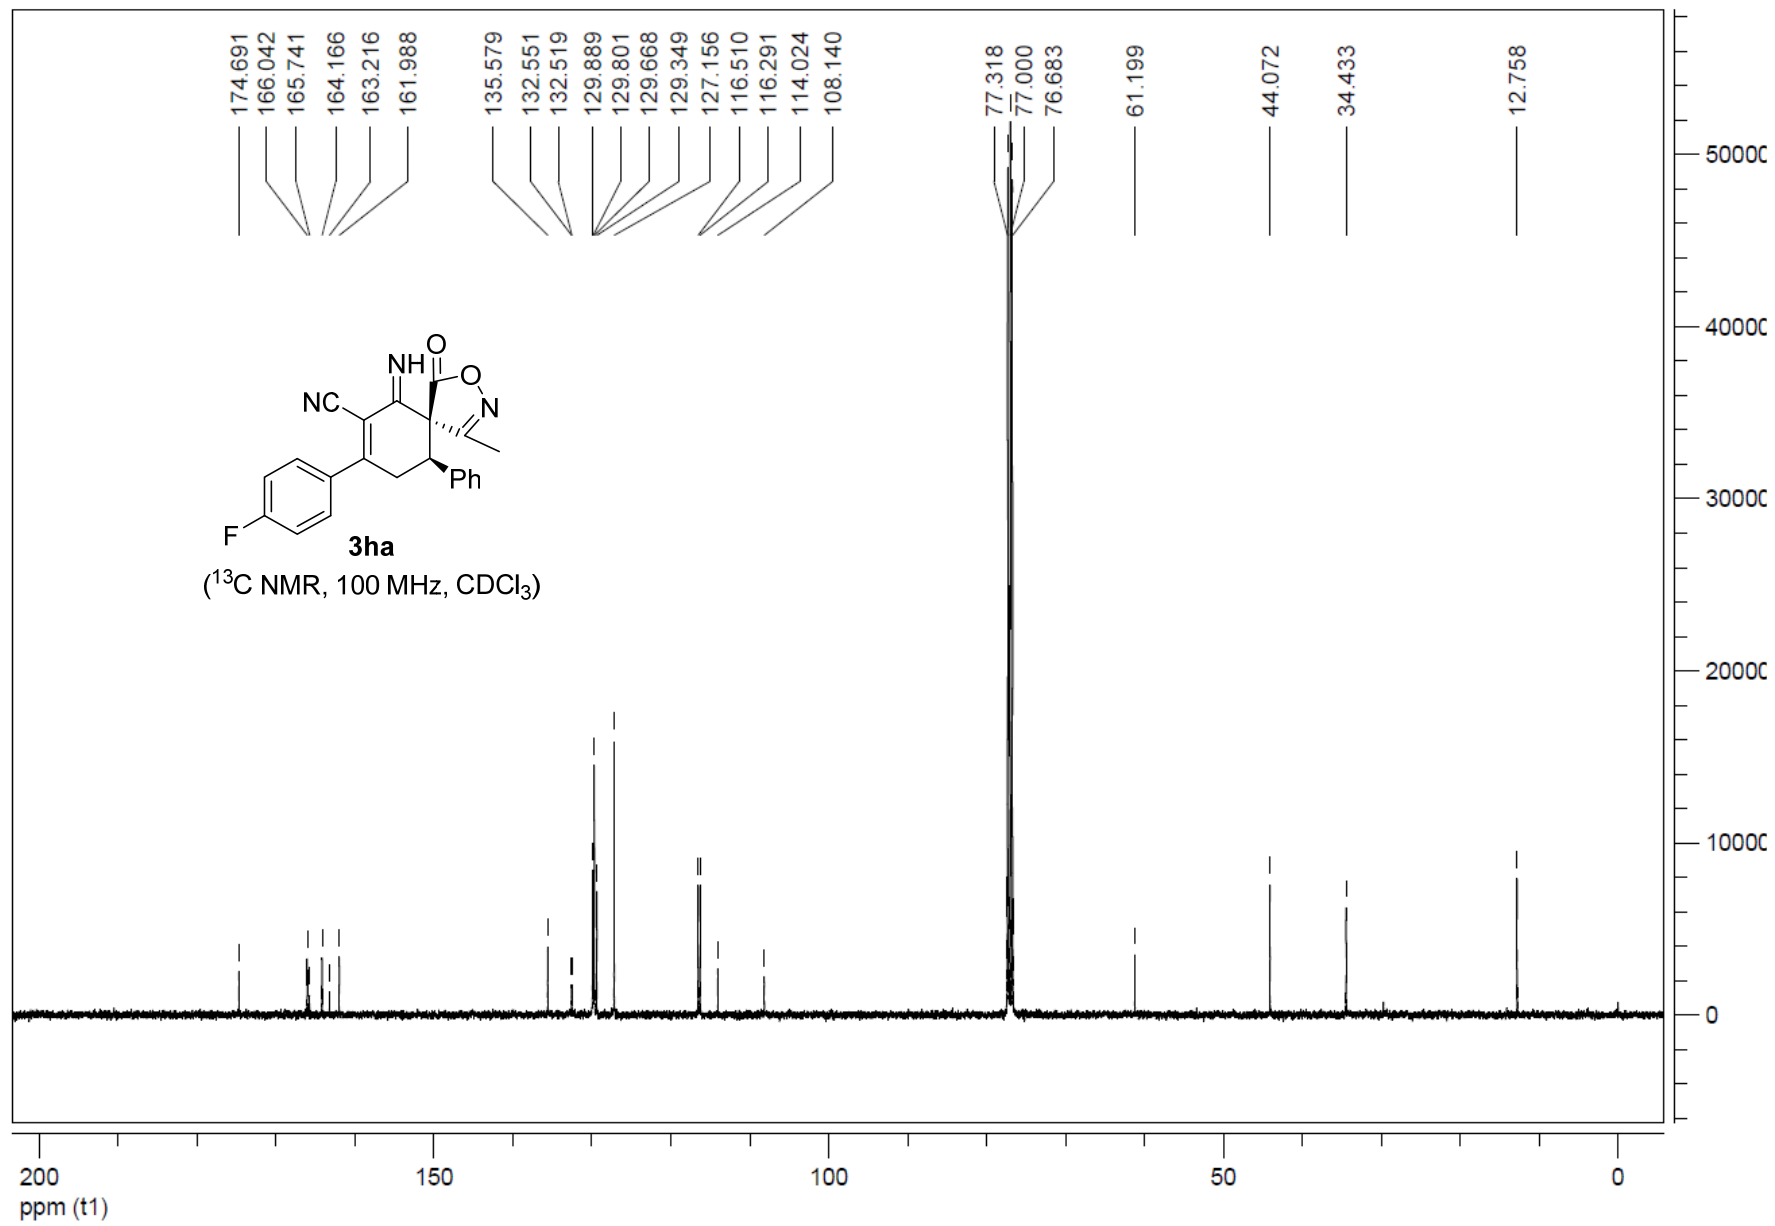

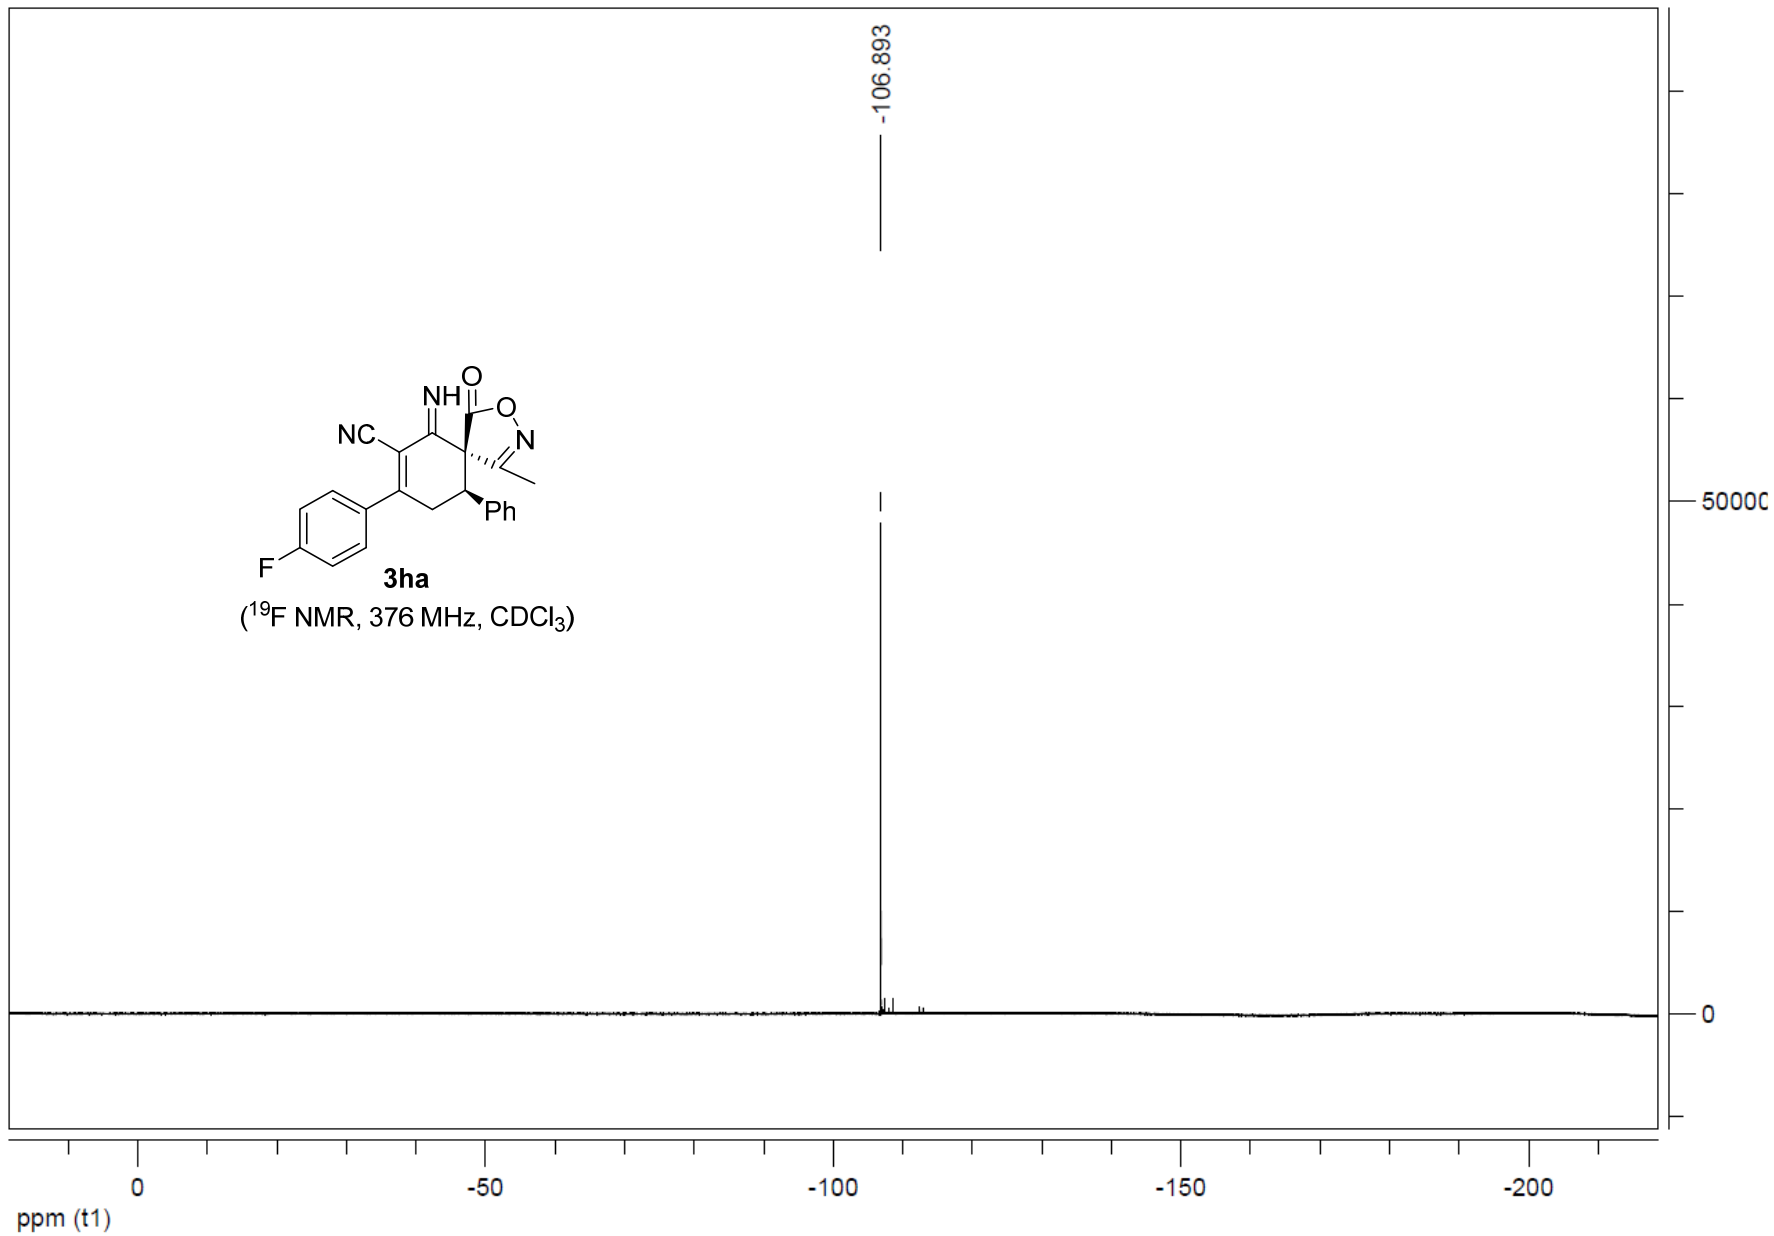

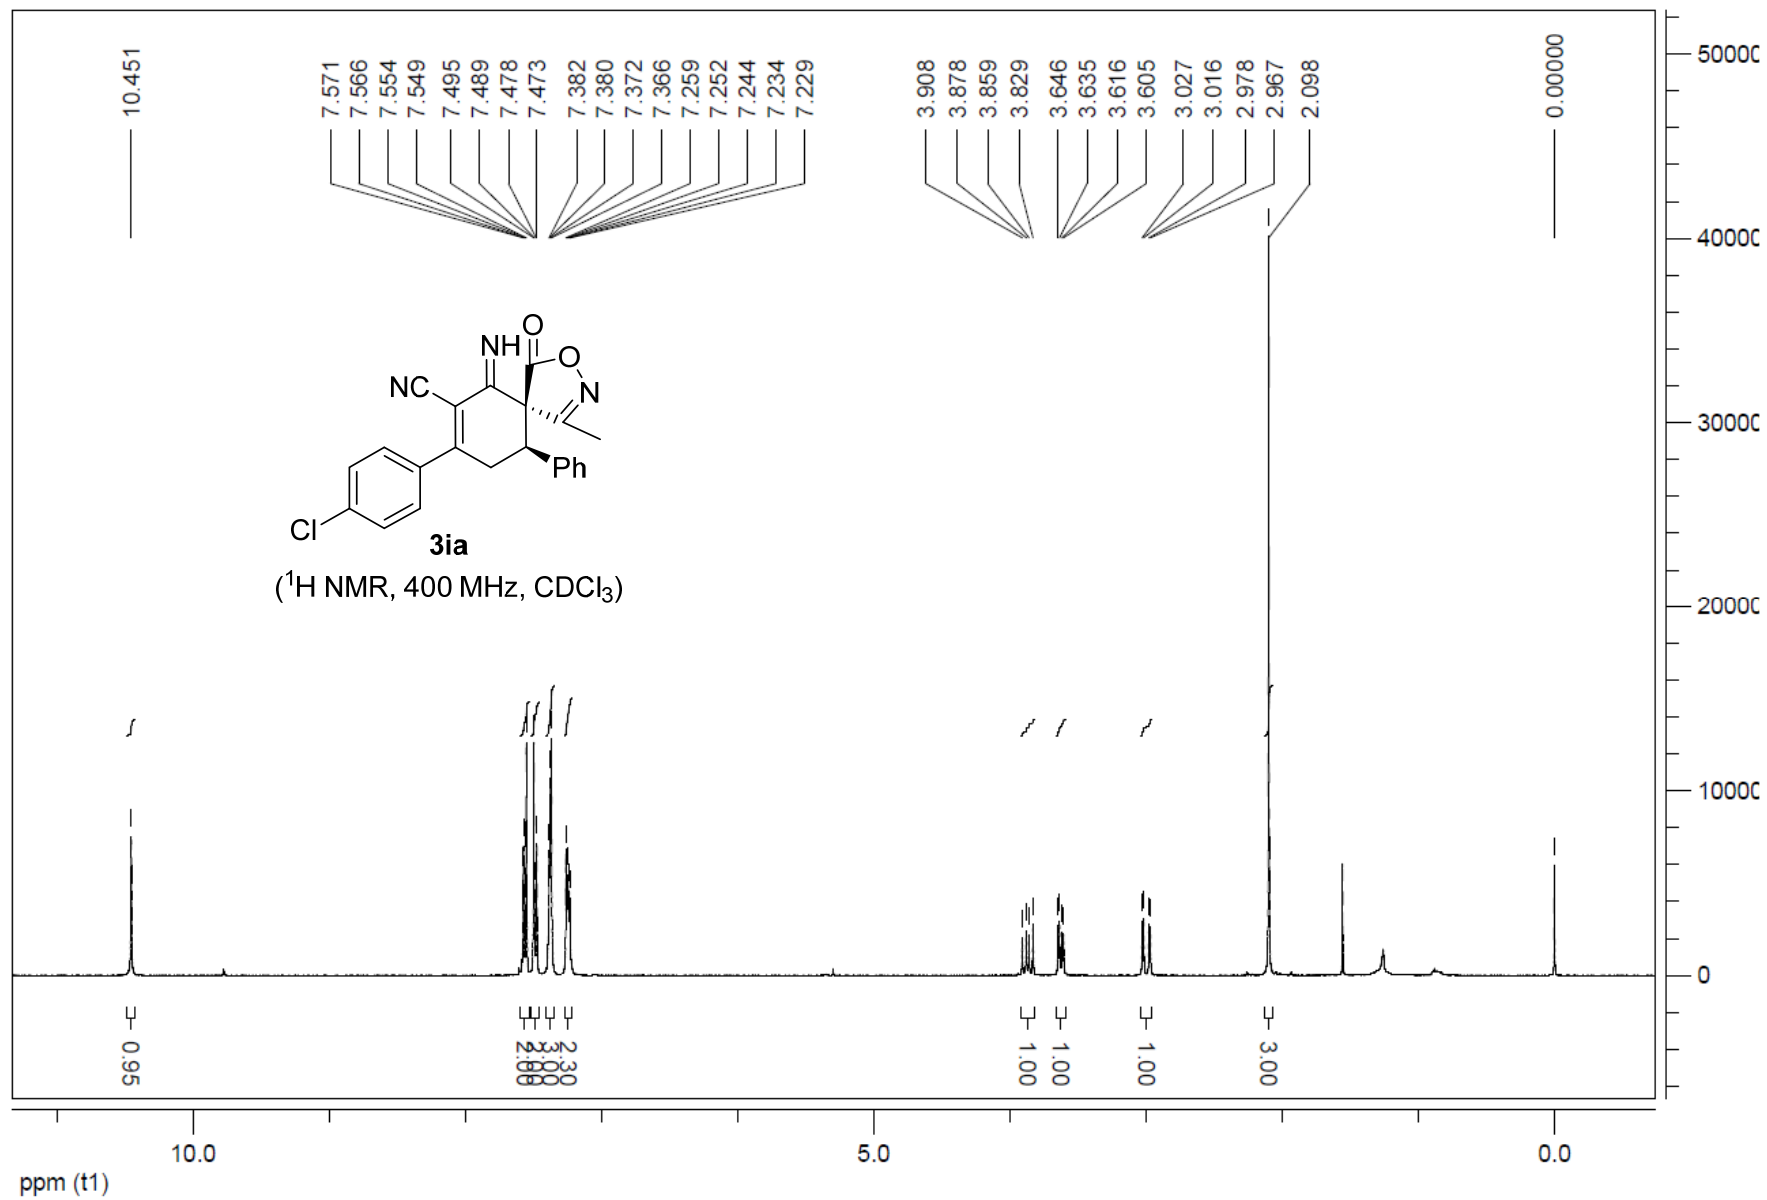



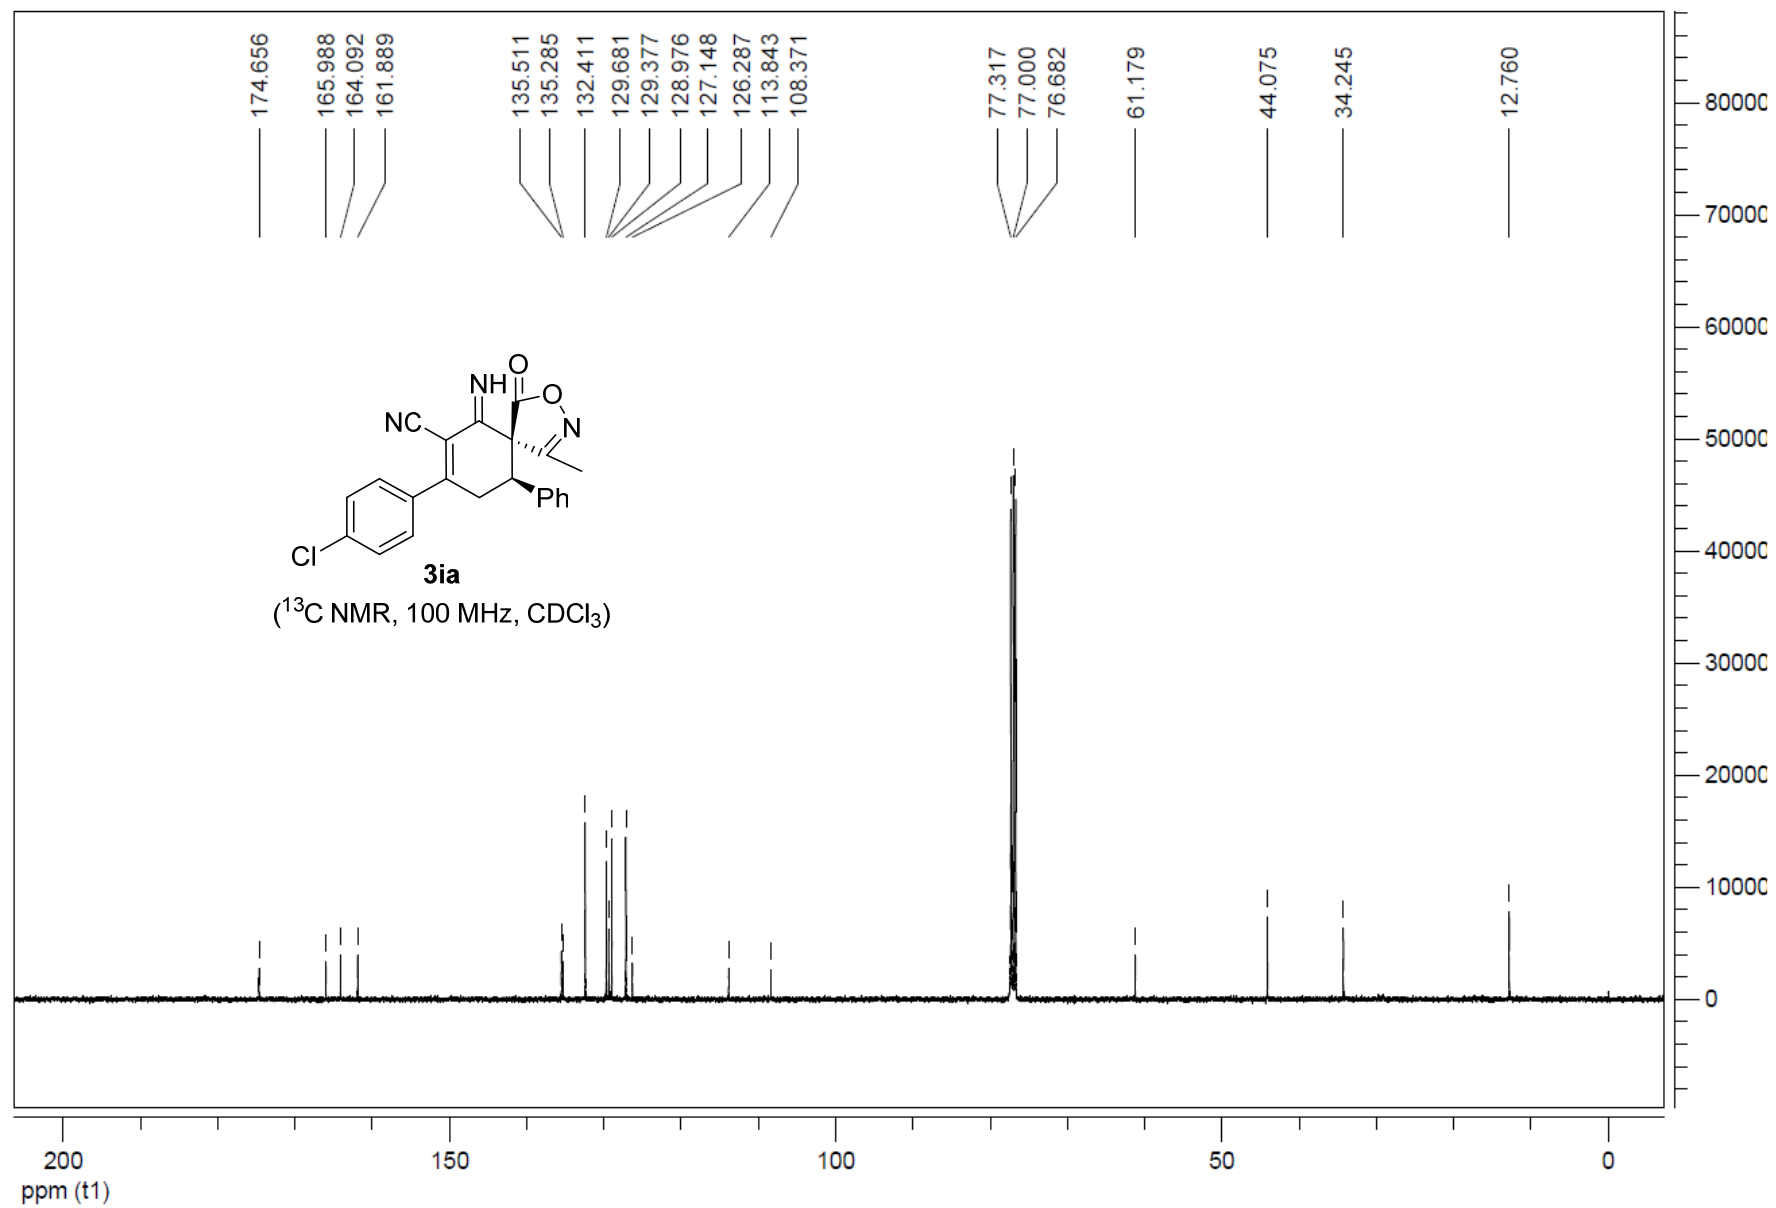

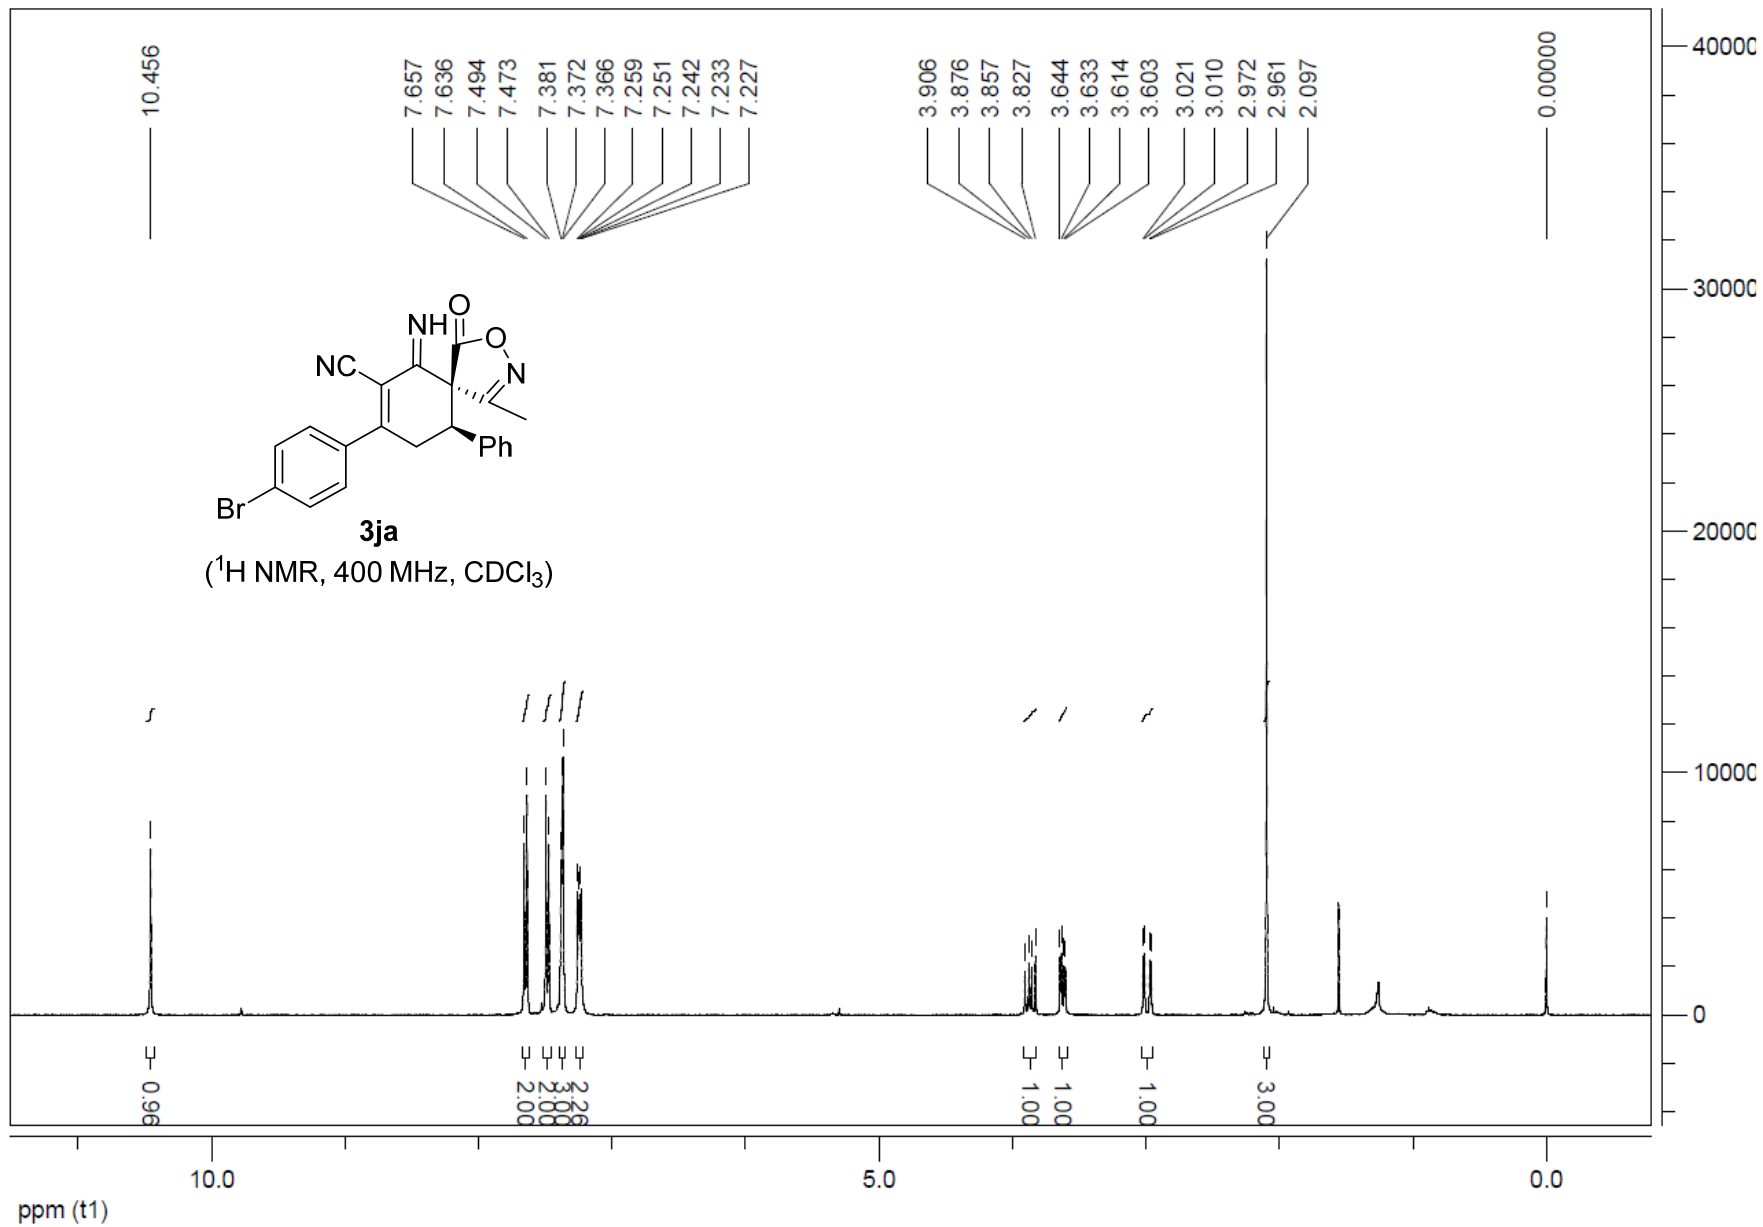

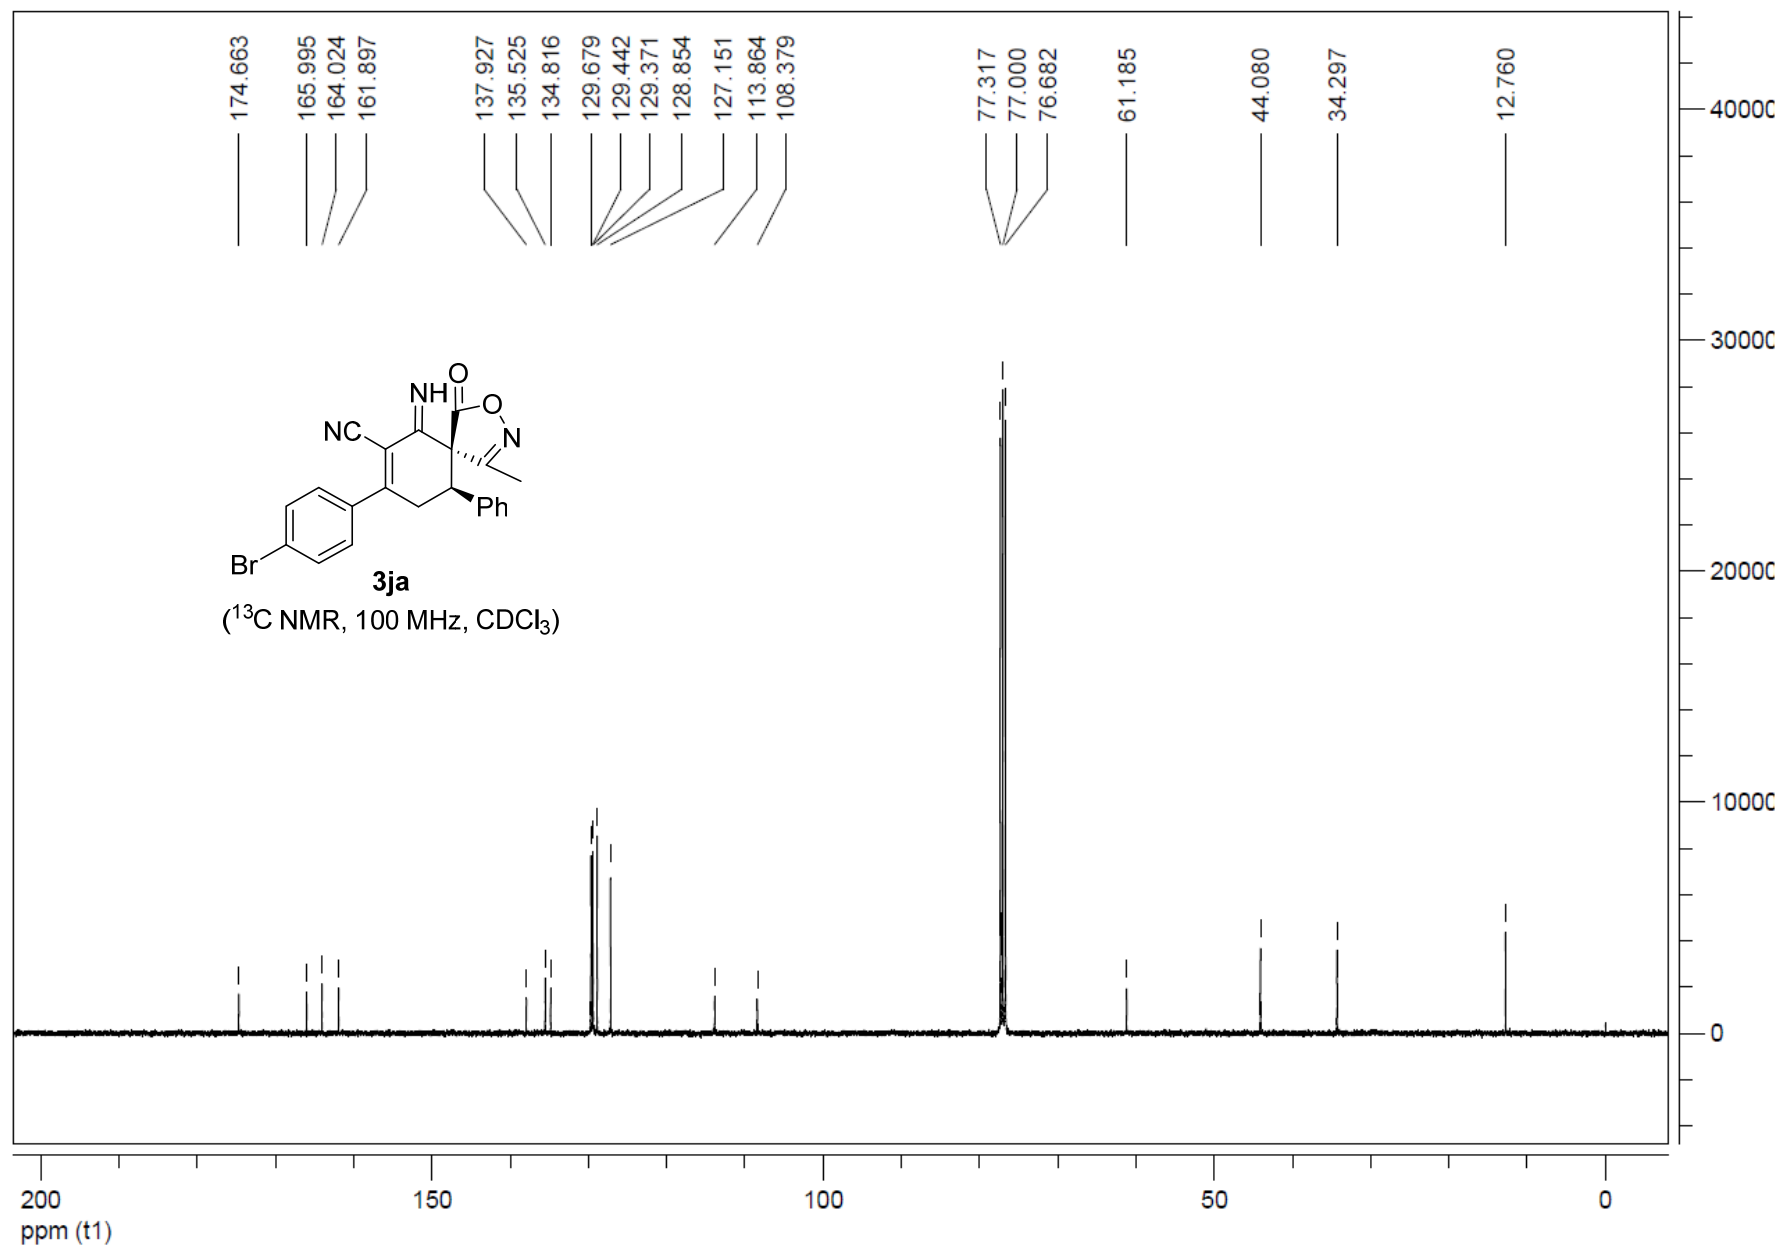

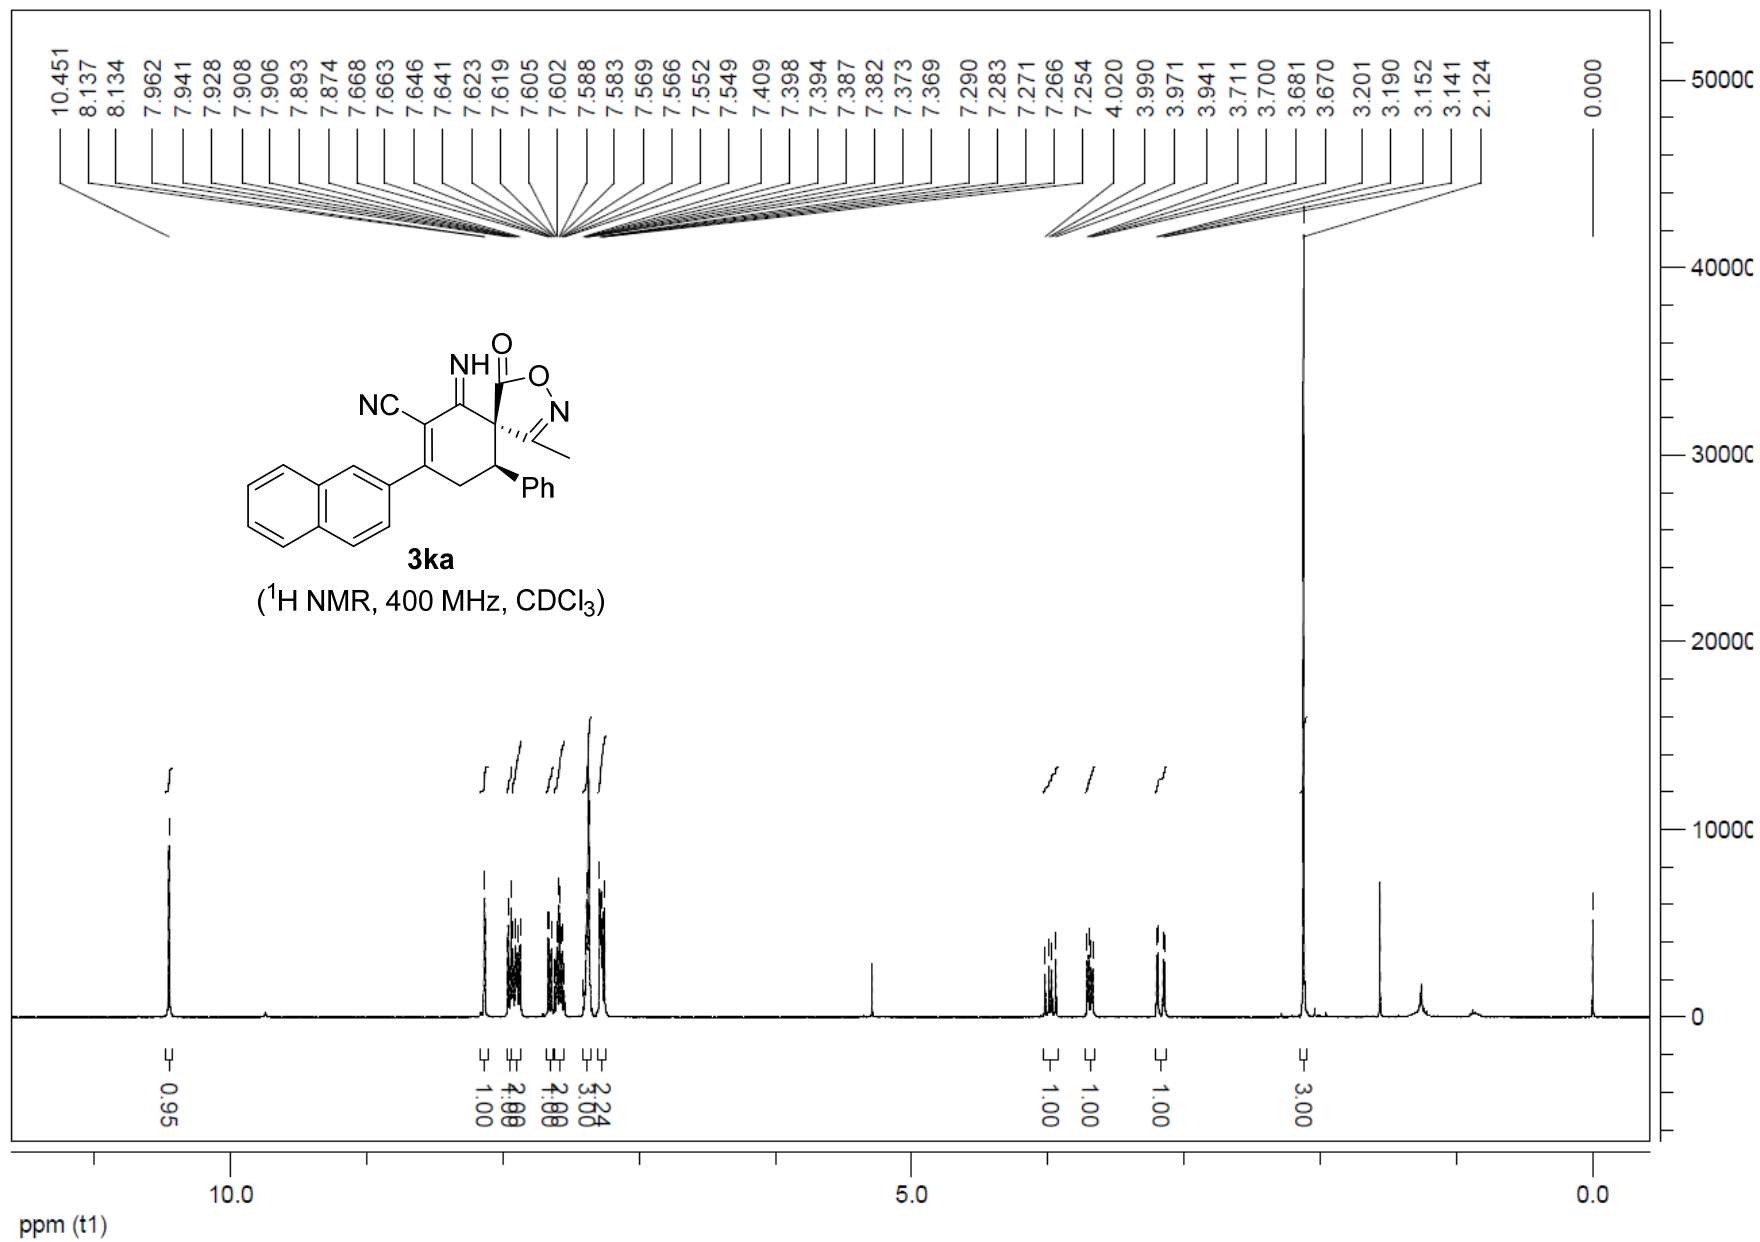

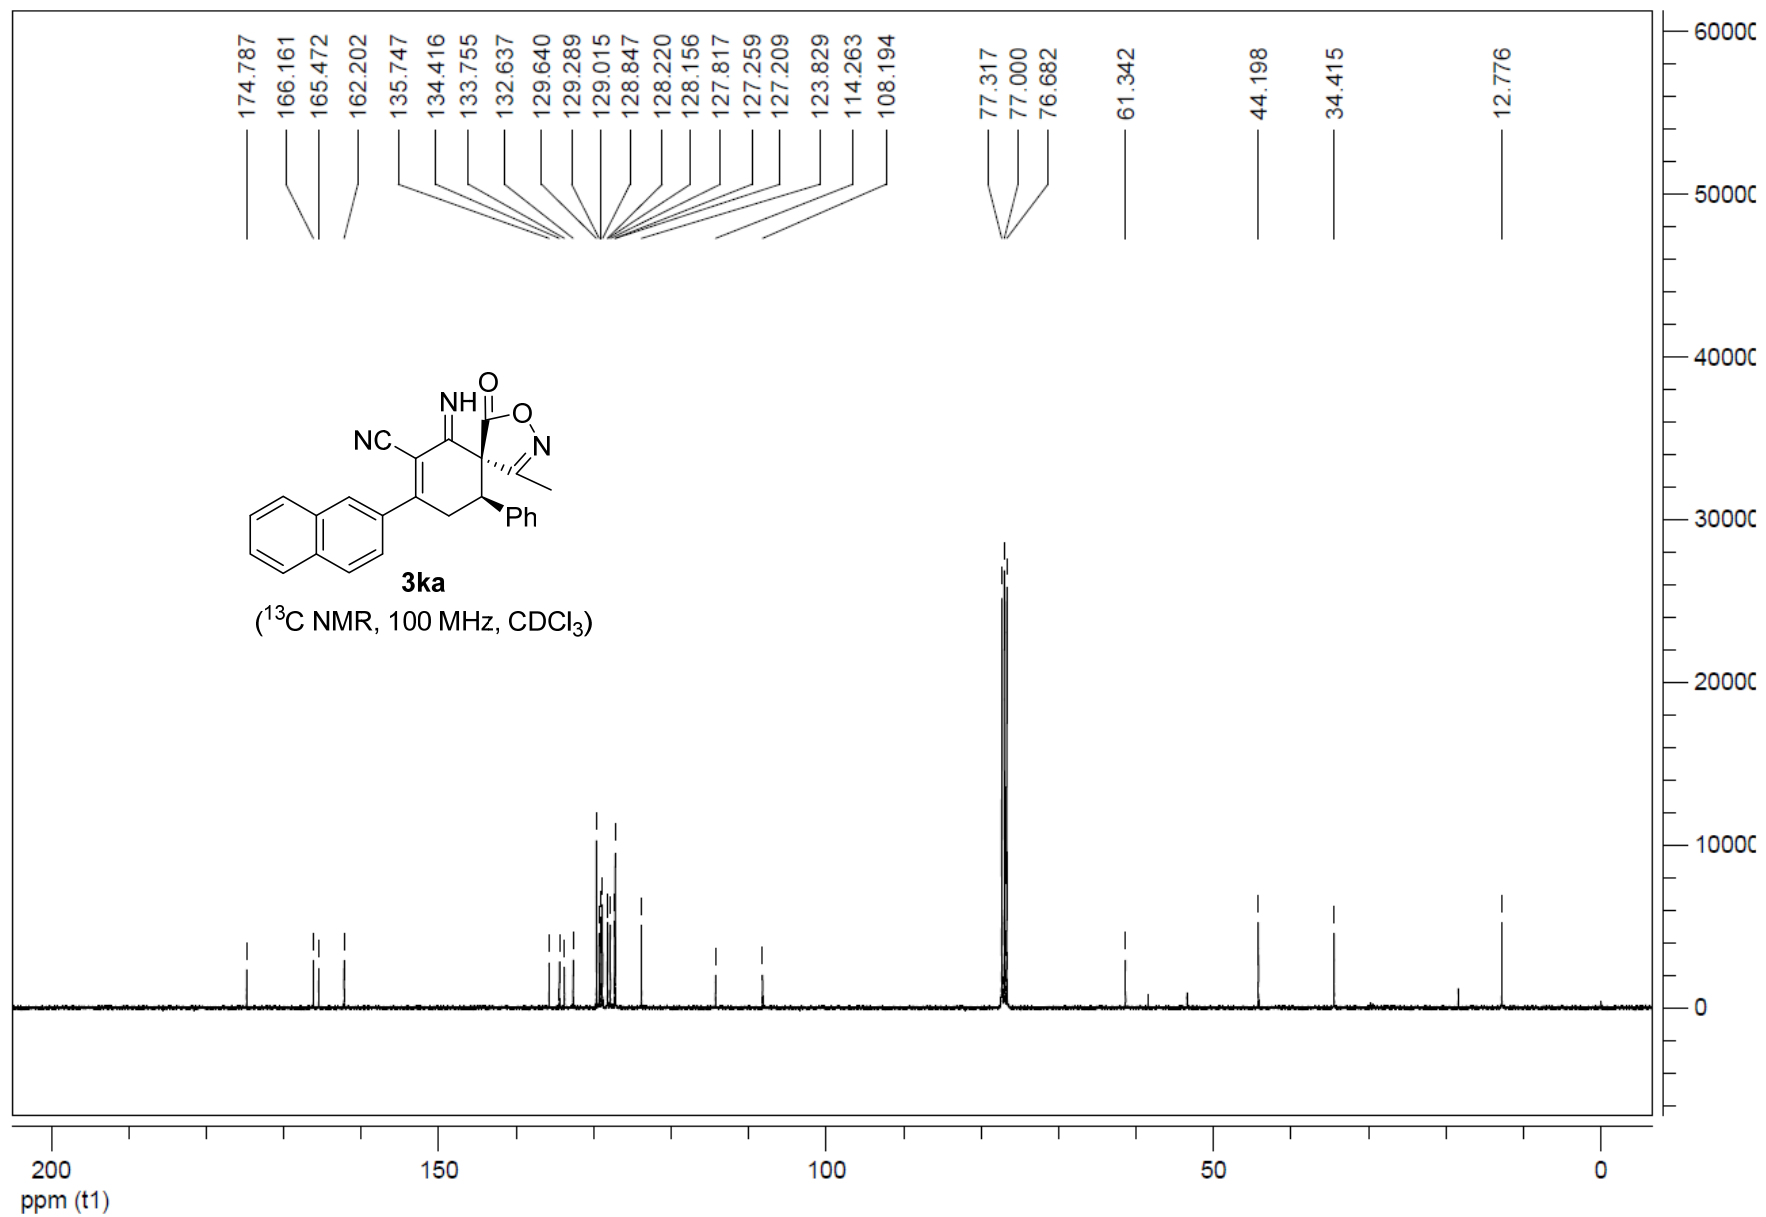

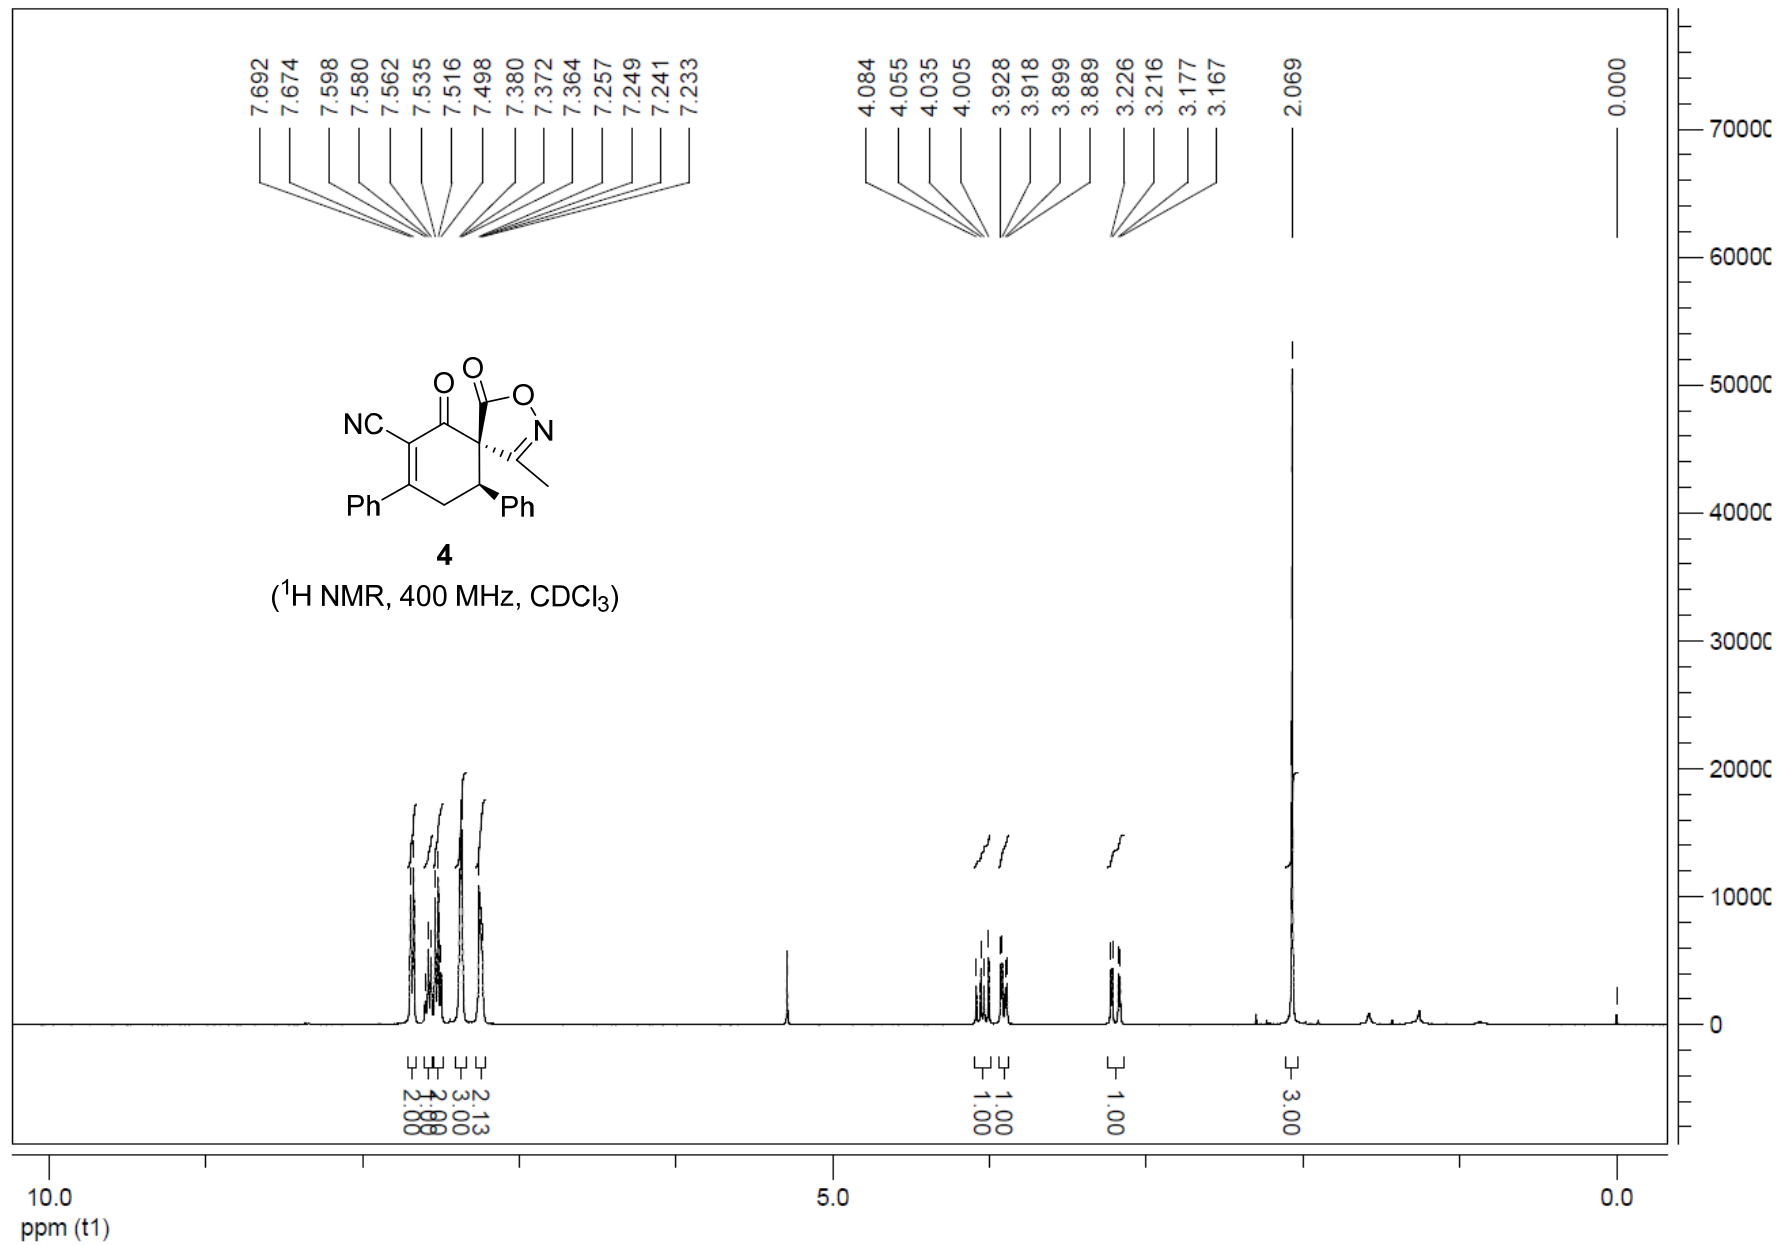

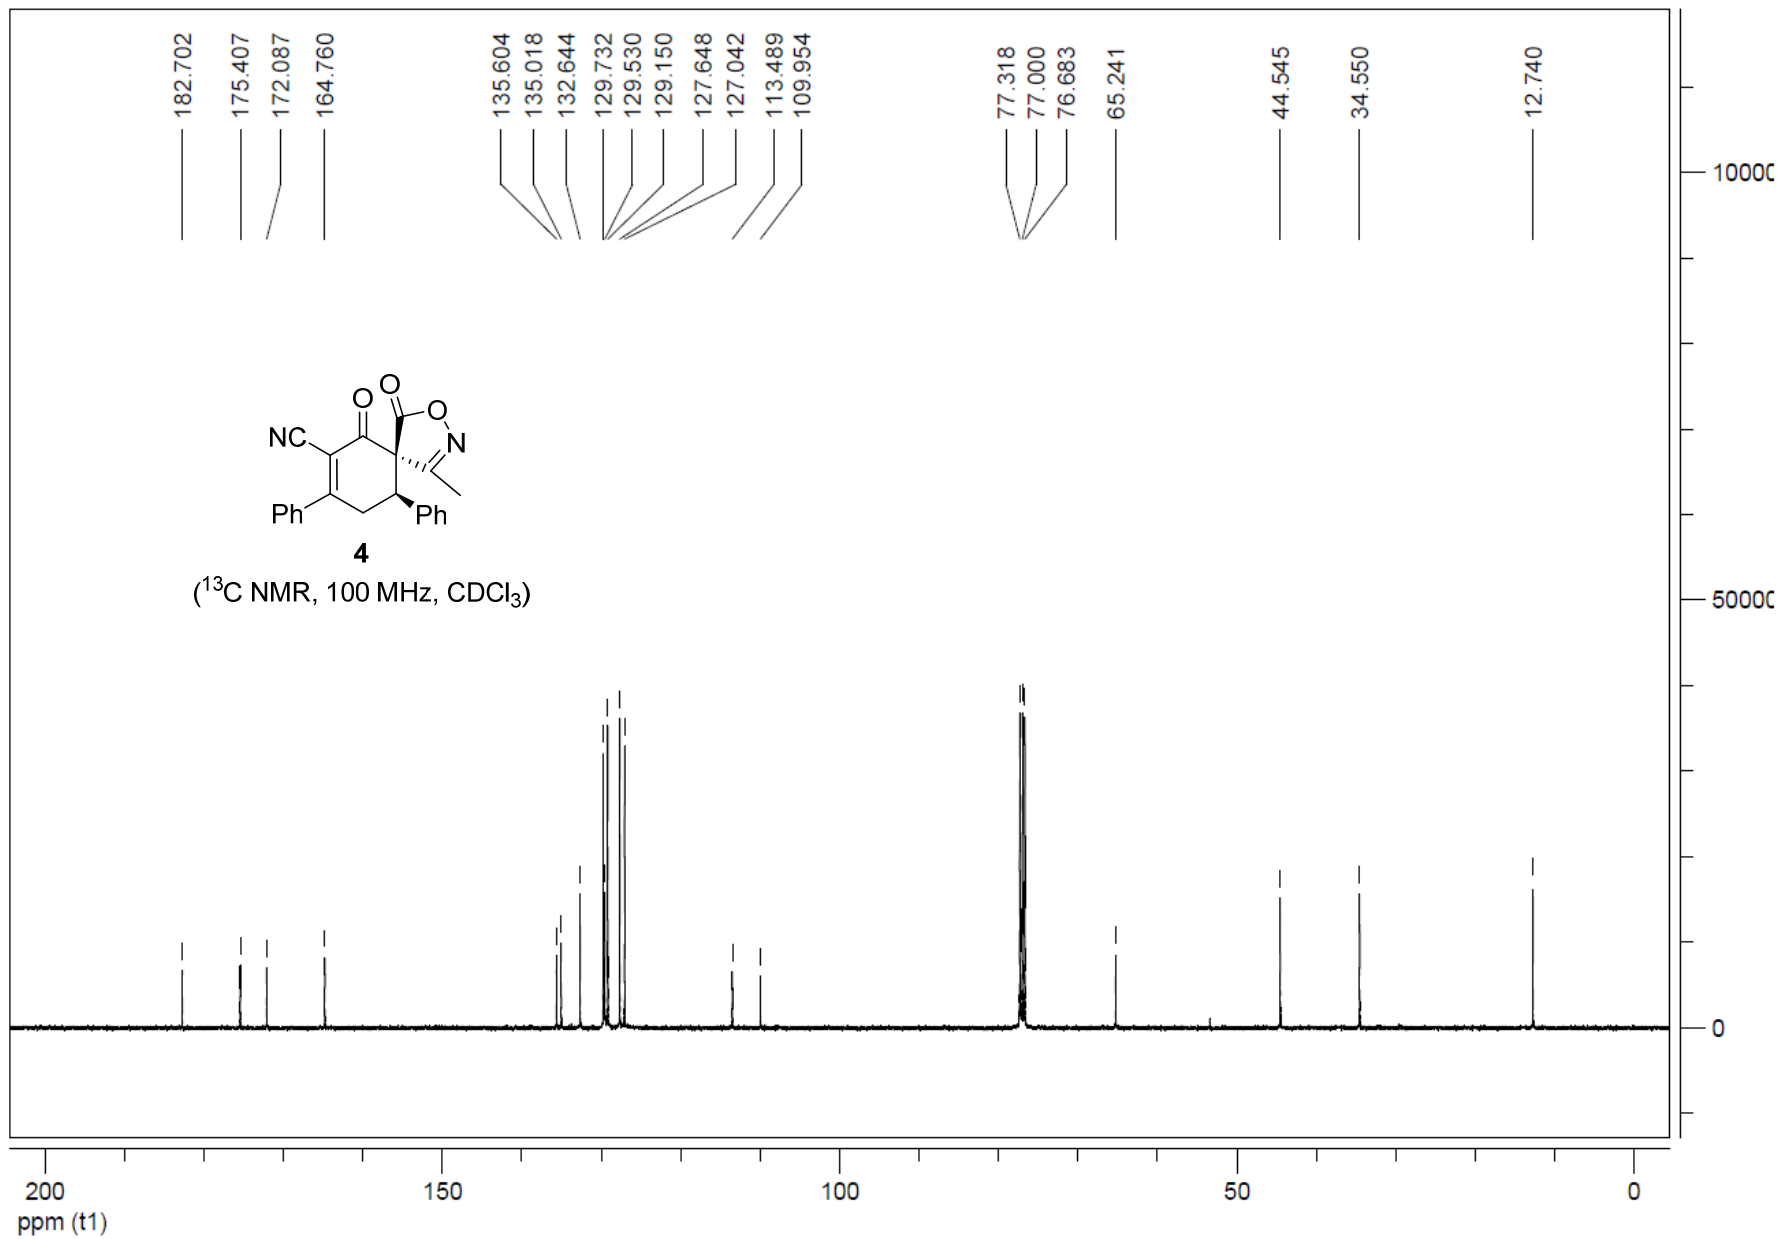

## 9. Copies of HPLC chromatograms

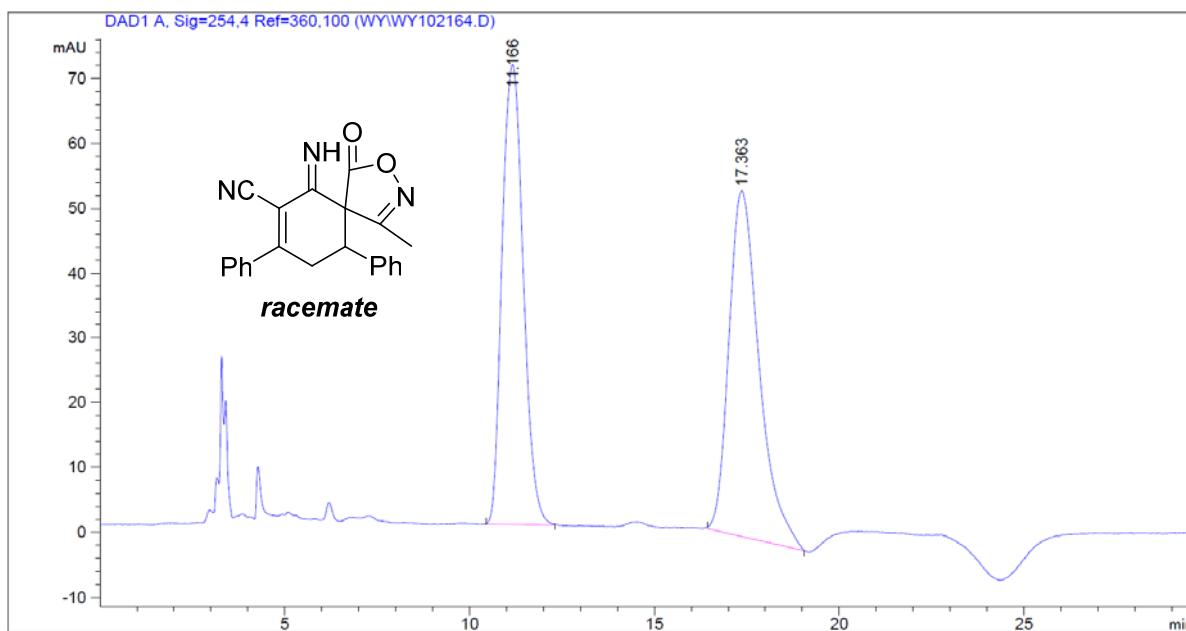

| Peak # | RetTime [min] | Type | Width [min] | Area [mAU*s] | Height [mAU] | Area %  |
|--------|---------------|------|-------------|--------------|--------------|---------|
| 1      | 11.166        | BB   | 0.6332      | 2815.93115   | 70.93016     | 48.1703 |
| 2      | 17.363        | BB   | 0.8205      | 3029.85059   | 53.35348     | 51.8297 |

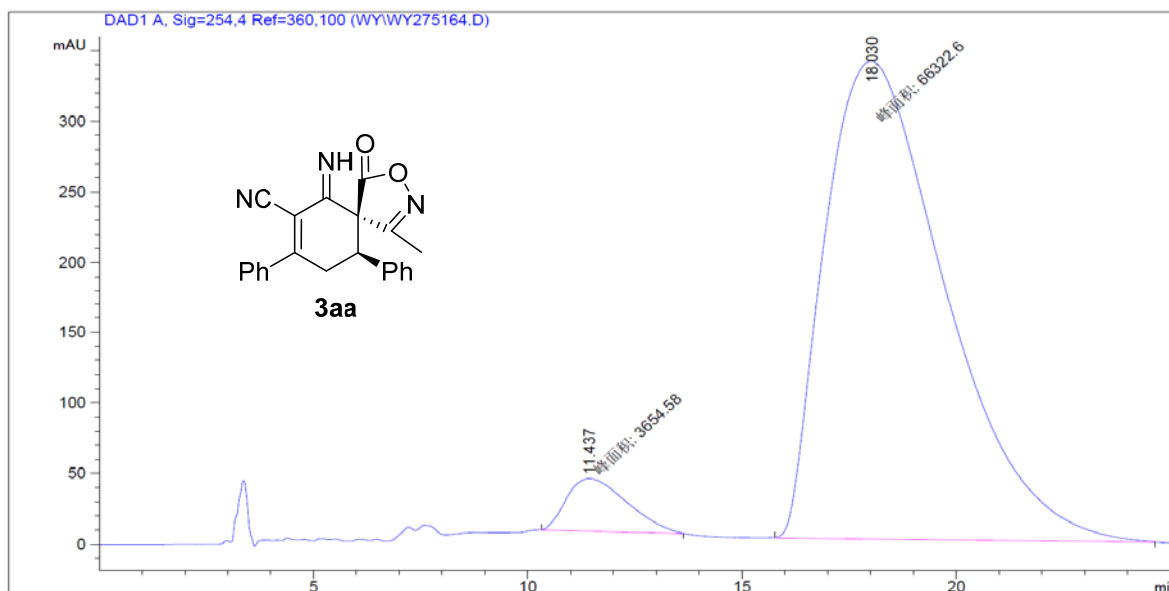

| Peak # | RetTime [min] | Type | Width [min] | Area [mAU*s] | Height [mAU] | Area %  |
|--------|---------------|------|-------------|--------------|--------------|---------|
| 1      | 11.437        | MM   | 1.6337      | 3654.58179   | 37.28378     | 5.2225  |
| 2      | 18.030        | MM   | 3.2602      | 6.63226e4    | 339.05377    | 94.7775 |



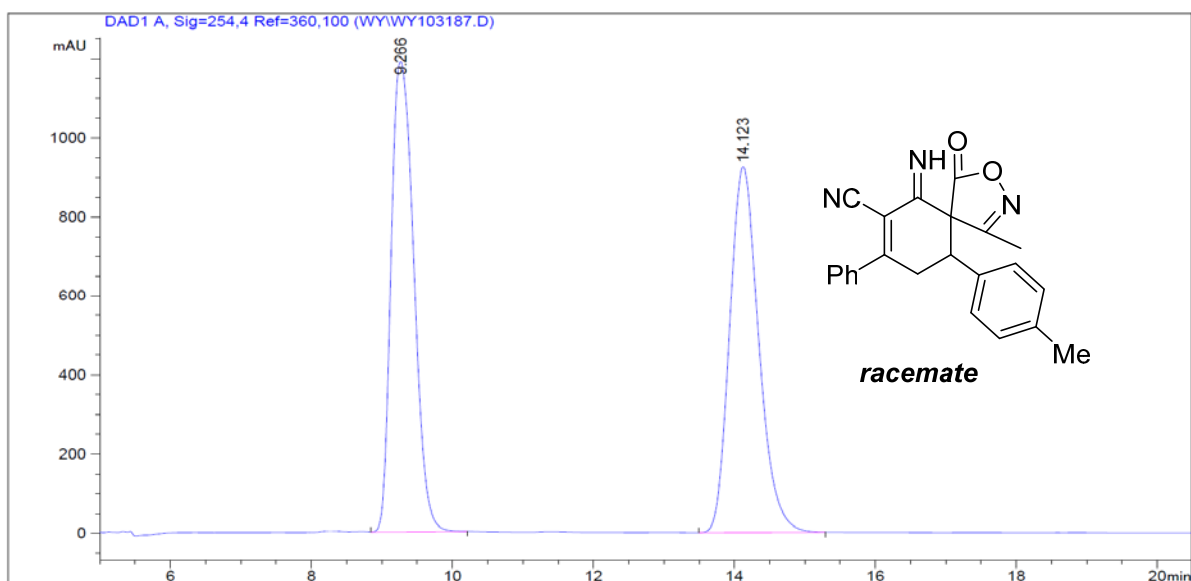

| Peak # | RetTime [min] | Type | Width [min] | Area [mAU*s] | Height [mAU] | Area %  |
|--------|---------------|------|-------------|--------------|--------------|---------|
| 1      | 9.266         | VB   | 0.3606      | 2.65624e4    | 1189.11438   | 50.0378 |
| 2      | 14.123        | BB   | 0.4426      | 2.65223e4    | 924.82520    | 49.9622 |

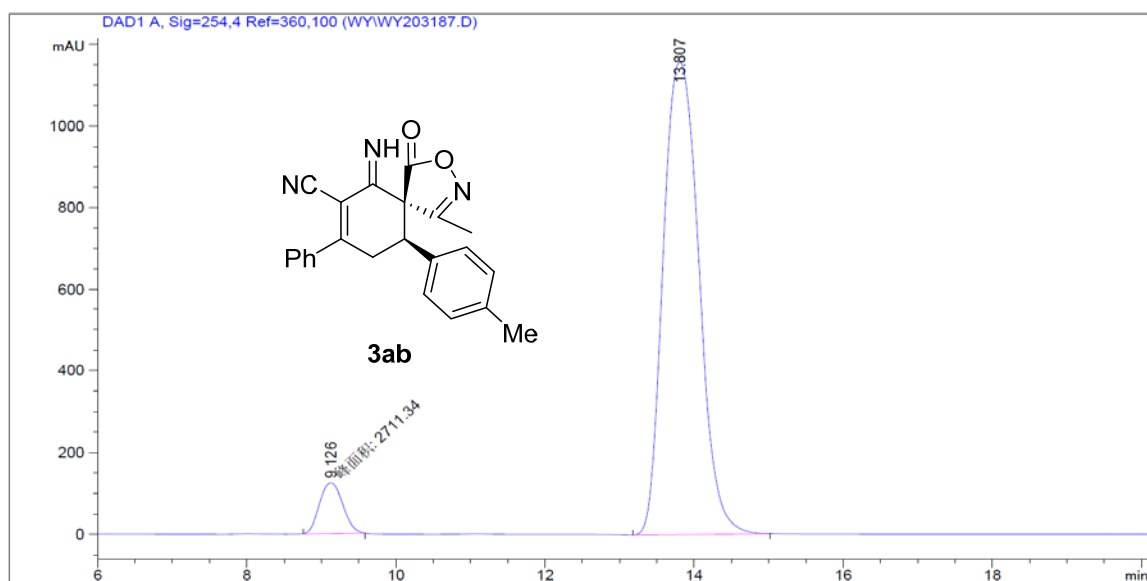

| Peak # | RetTime [min] | Type | Width [min] | Area [mAU*s] | Height [mAU] | Area %  |
|--------|---------------|------|-------------|--------------|--------------|---------|
| 1      | 9.126         | MM   | 0.3621      | 2711.34058   | 124.80051    | 6.5793  |
| 2      | 13.807        | BB   | 0.5462      | 3.84990e4    | 1157.08606   | 93.4207 |

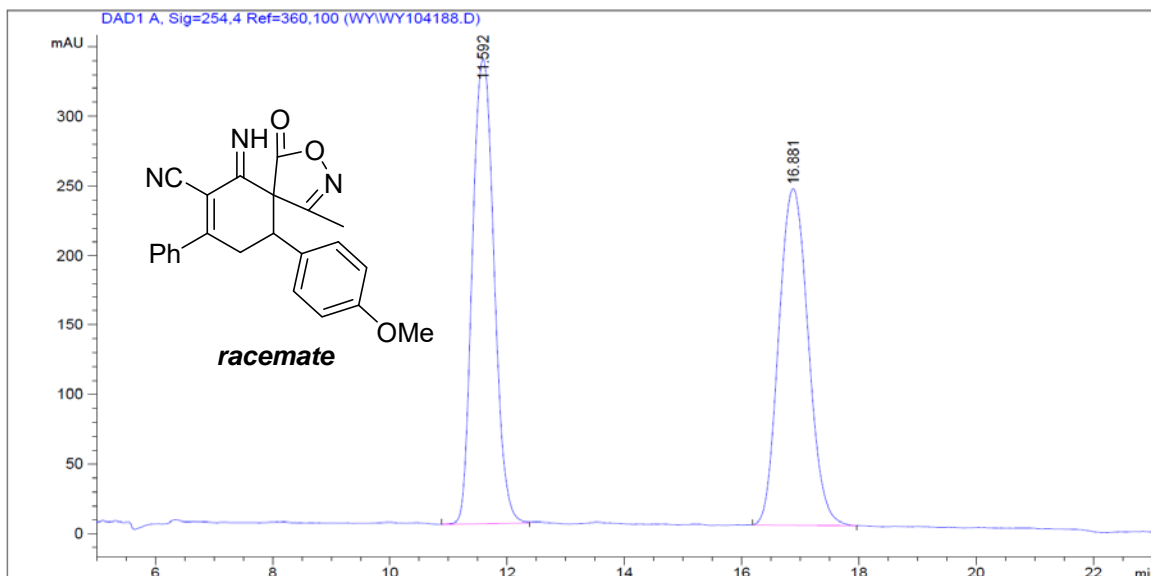

| Peak # | RetTime [min] | Type | Width [min] | Area [mAU*s] | Height [mAU] | Area %  |
|--------|---------------|------|-------------|--------------|--------------|---------|
| 1      | 11.592        | BB   | 0.4095      | 8573.58496   | 334.01581    | 50.4193 |
| 2      | 16.881        | BB   | 0.5566      | 8430.98828   | 241.92810    | 49.5807 |

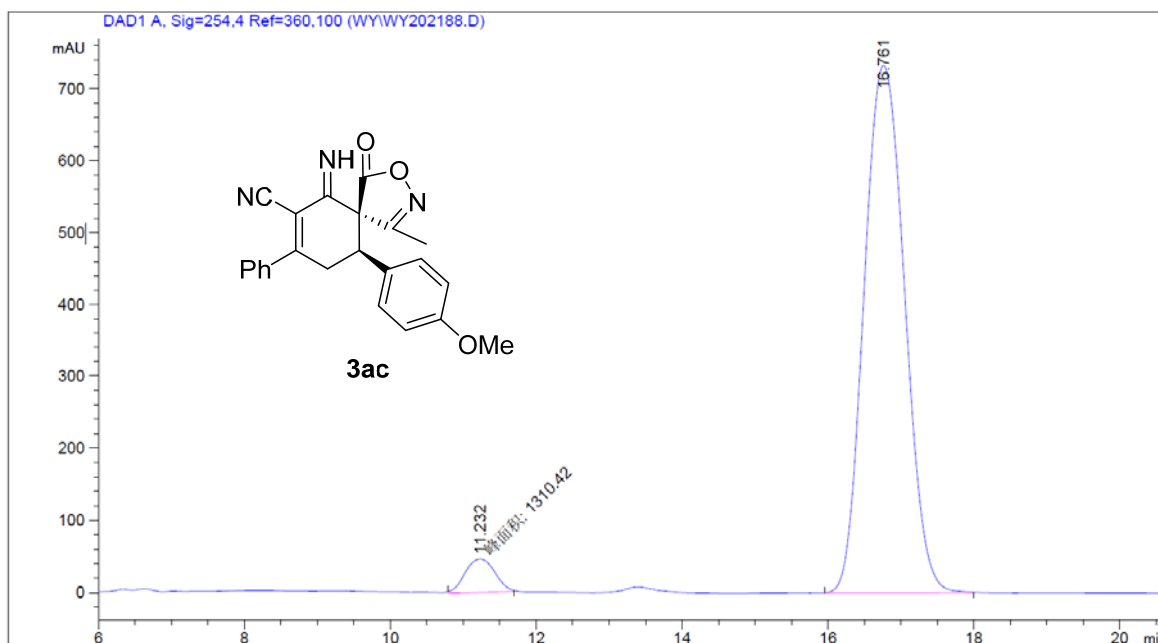

| Peak # | RetTime [min] | Type | Width [min] | Area [mAU*s] | Height [mAU] | Area %  |
|--------|---------------|------|-------------|--------------|--------------|---------|
| 1      | 11.232        | MM   | 0.4715      | 1310.42053   | 46.32589     | 4.4421  |
| 2      | 16.761        | BB   | 0.6150      | 2.81898e4    | 732.53064    | 95.5579 |

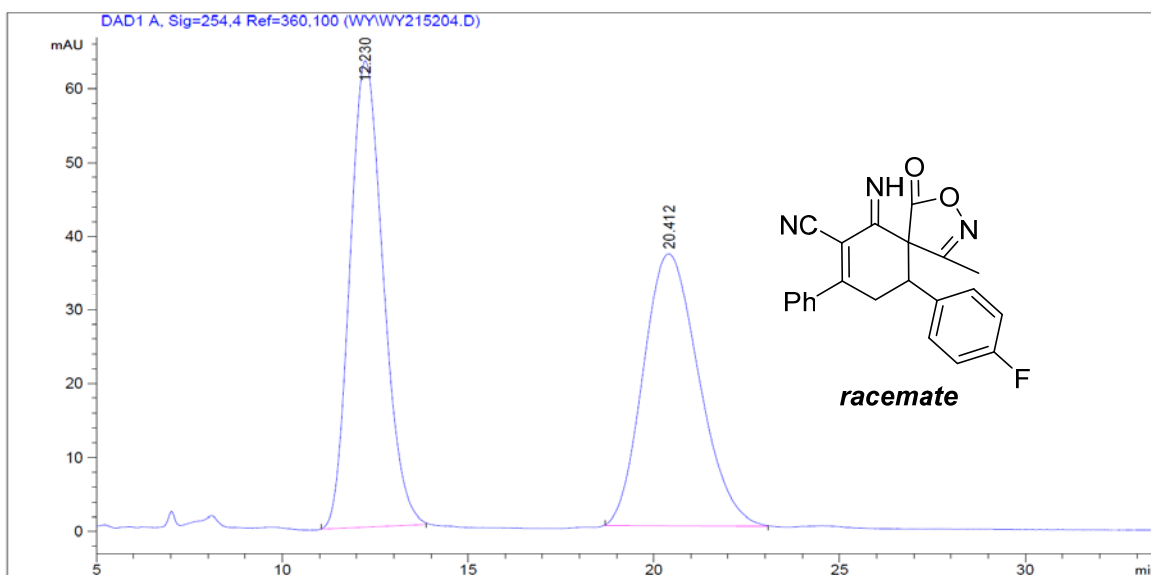

| Peak # | RetTime [min] | Type | Width [min] | Area [mAU*s] | Height [mAU] | Area %  |
|--------|---------------|------|-------------|--------------|--------------|---------|
| 1      | 12.230        | BB   | 0.9450      | 3939.16333   | 63.21283     | 50.7009 |
| 2      | 20.412        | BB   | 1.2288      | 3830.25317   | 36.90601     | 49.2991 |

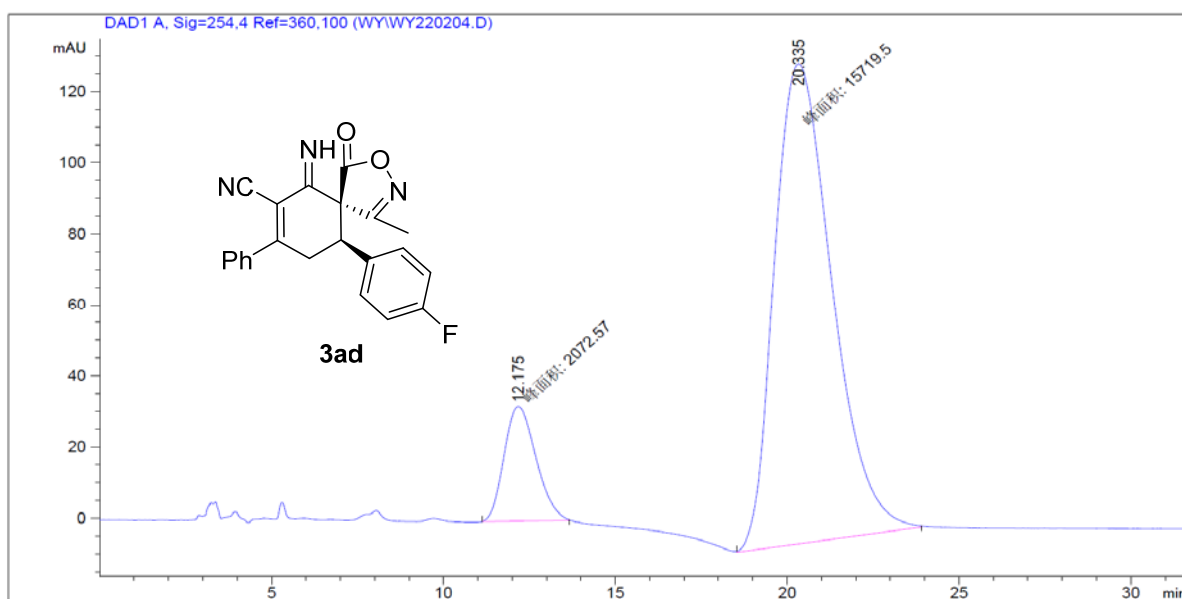

| Peak # | RetTime [min] | Type | Width [min] | Area [mAU*s] | Height [mAU] | Area %  |
|--------|---------------|------|-------------|--------------|--------------|---------|
| 1      | 12.175        | MM   | 1.0750      | 2072.56763   | 32.13149     | 11.6488 |
| 2      | 20.335        | MM   | 1.9425      | 1.57195e4    | 134.87367    | 88.3512 |

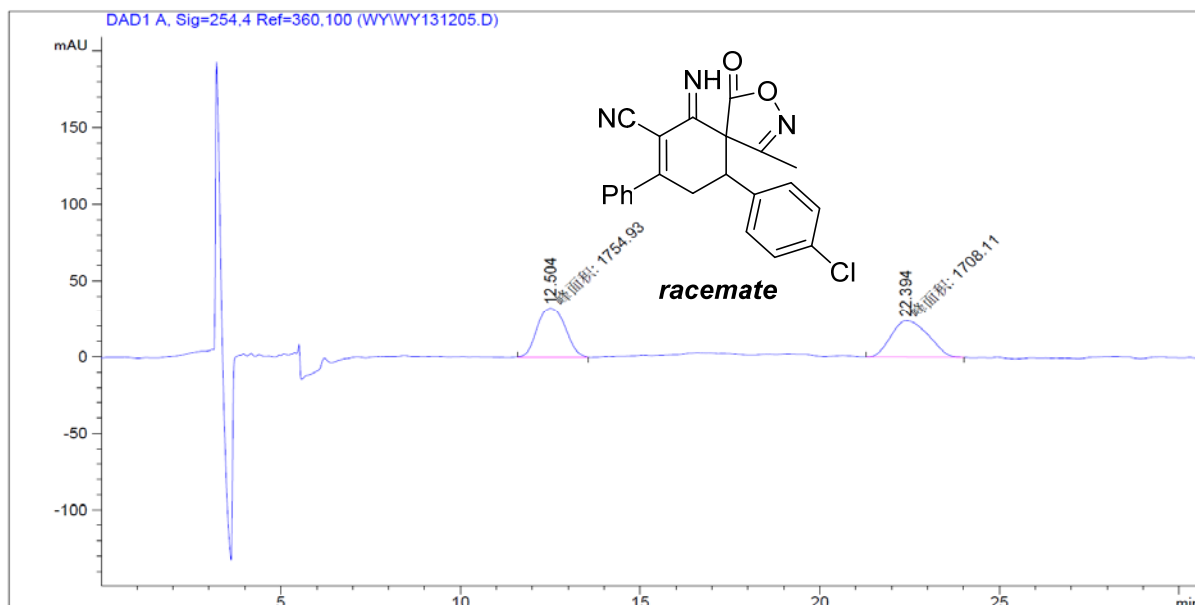

| Peak # | RetTime [min] | Type | Width [min] | Area [mAU*s] | Height [mAU] | Area %  |
|--------|---------------|------|-------------|--------------|--------------|---------|
| 1      | 12.504        | MM   | 0.9041      | 1754.93445   | 32.35089     | 50.6760 |
| 2      | 22.394        | MM   | 1.1973      | 1708.11206   | 23.77815     | 49.3240 |

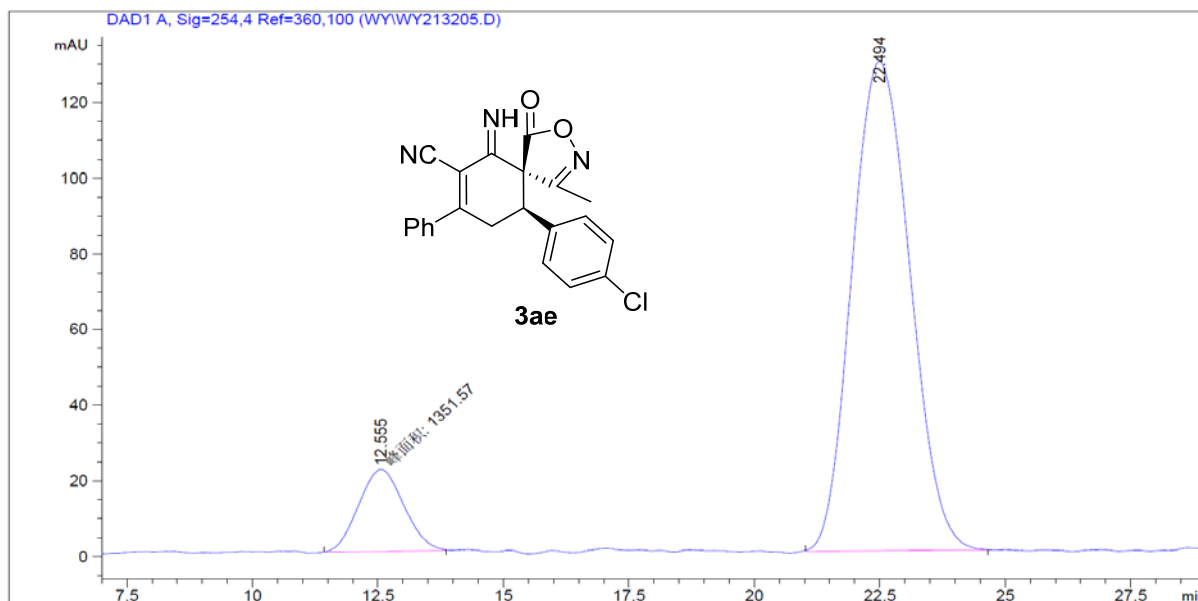

| Peak # | RetTime [min] | Type | Width [min] | Area [mAU*s] | Height [mAU] | Area %  |
|--------|---------------|------|-------------|--------------|--------------|---------|
| 1      | 12.555        | MM   | 1.0419      | 1351.57410   | 21.62125     | 11.5087 |
| 2      | 22.494        | BB   | 1.2618      | 1.03923e4    | 129.28760    | 88.4913 |

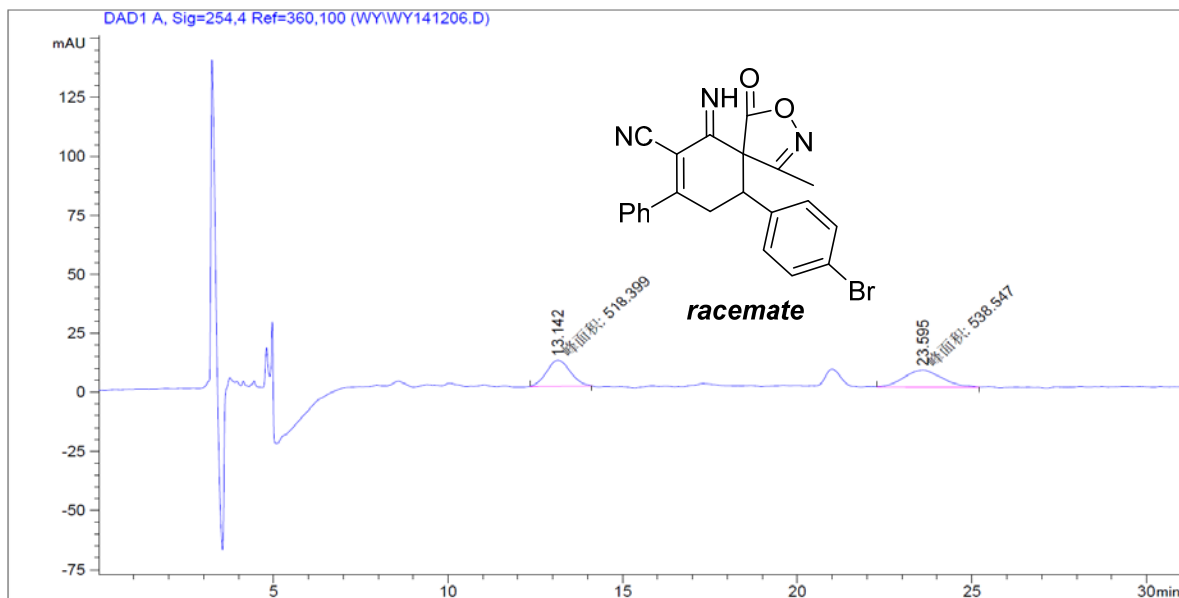

| Peak # | RetTime [min] | Type | Width [min] | Area [mAU*s] | Height [mAU] | Area %  |
|--------|---------------|------|-------------|--------------|--------------|---------|
| 1      | 13.142        | MM   | 0.7848      | 518.39899    | 11.00887     | 49.0469 |
| 2      | 23.595        | MM   | 1.2519      | 538.54657    | 7.16989      | 50.9531 |

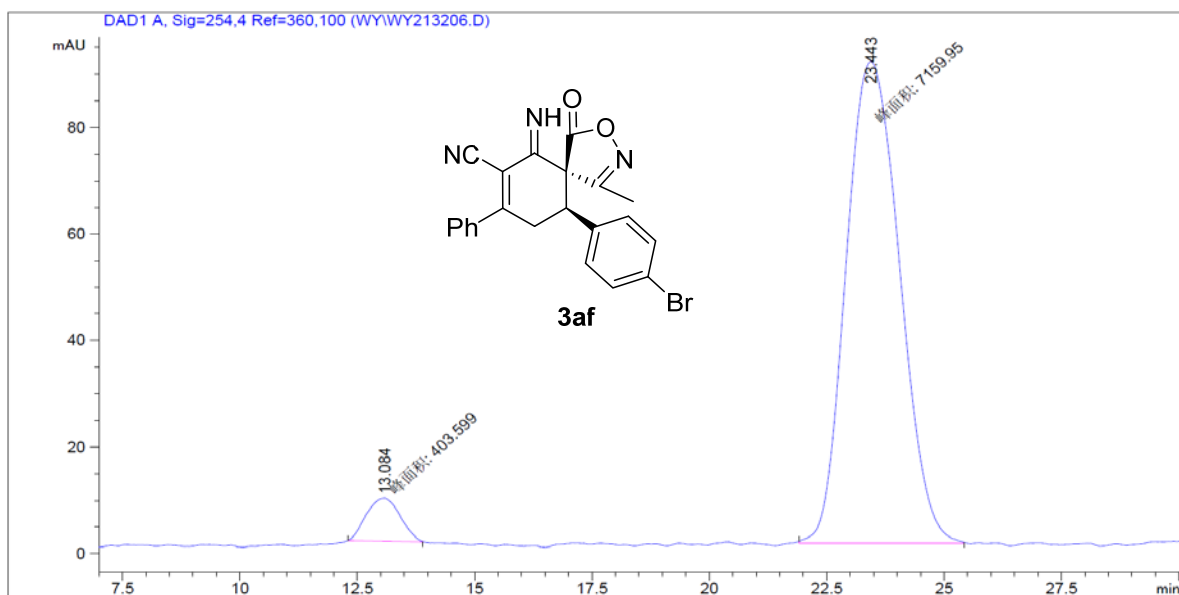

| Peak # | RetTime [min] | Type | Width [min] | Area [mAU*s] | Height [mAU] | Area %  |
|--------|---------------|------|-------------|--------------|--------------|---------|
| 1      | 13.084        | MM   | 0.8282      | 403.59927    | 8.12233      | 5.3361  |
| 2      | 23.443        | MM   | 1.3210      | 7159.95312   | 90.33161     | 94.6639 |

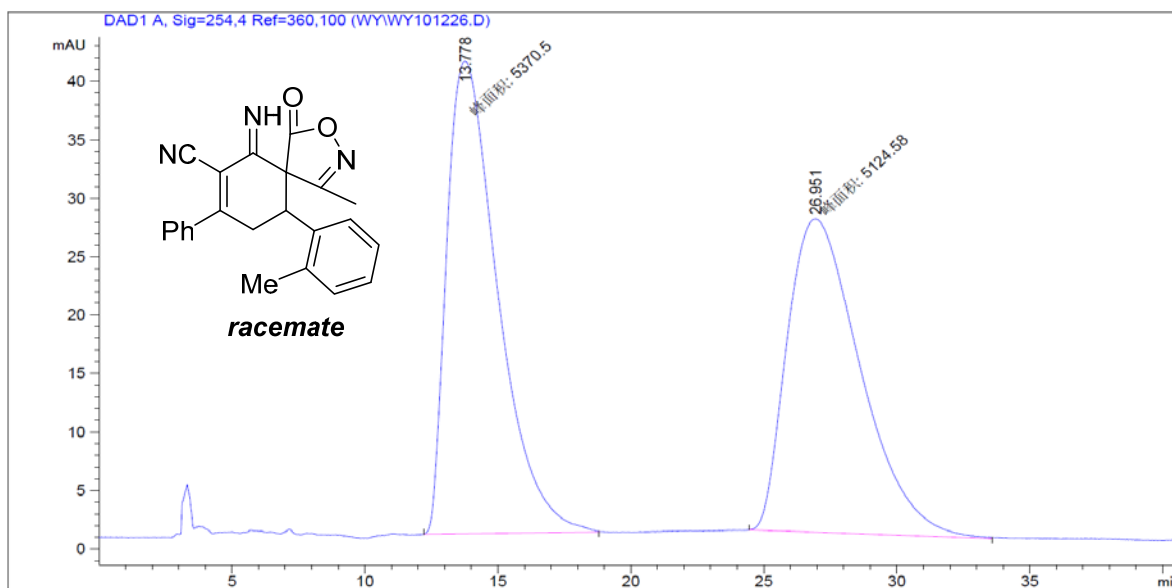

| Peak # | RetTime [min] | Type | Width [min] | Area [mAU*s] | Height [mAU] | Area %  |
|--------|---------------|------|-------------|--------------|--------------|---------|
| 1      | 13.778        | MM   | 2.2141      | 5370.49854   | 40.42559     | 51.1716 |
| 2      | 26.951        | MM   | 3.1849      | 5124.57813   | 26.81724     | 48.8284 |

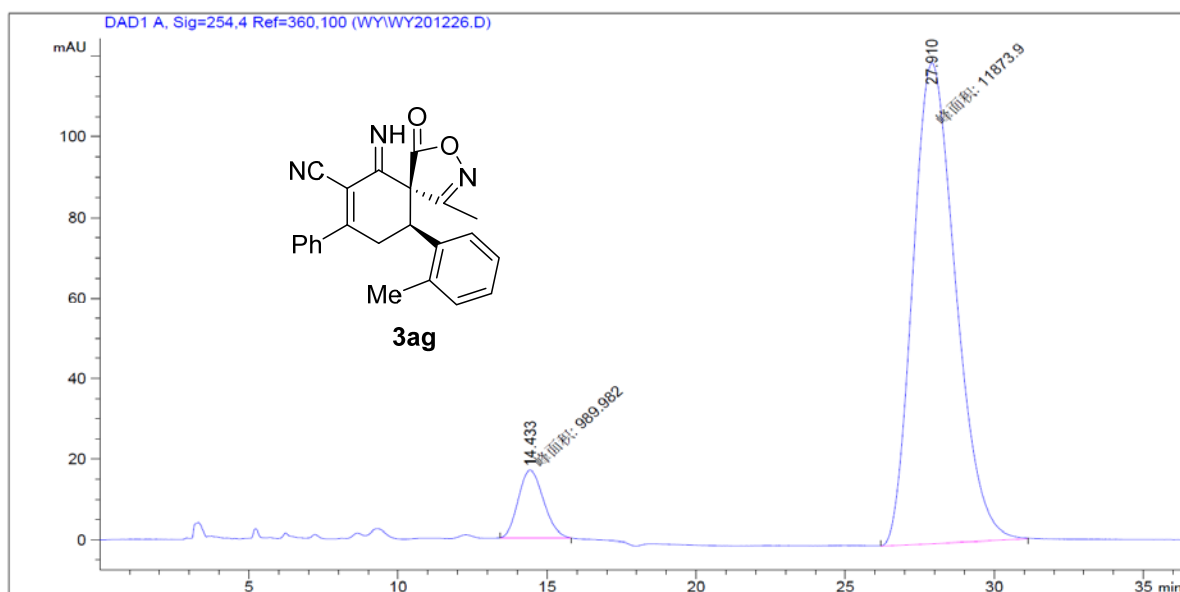

| Peak # | RetTime [min] | Type | Width [min] | Area [mAU*s] | Height [mAU] | Area %  |
|--------|---------------|------|-------------|--------------|--------------|---------|
| 1      | 14.433        | MM   | 0.9841      | 989.98224    | 16.76697     | 7.6959  |
| 2      | 27.910        | MM   | 1.6618      | 1.18739e4    | 119.08746    | 92.3041 |

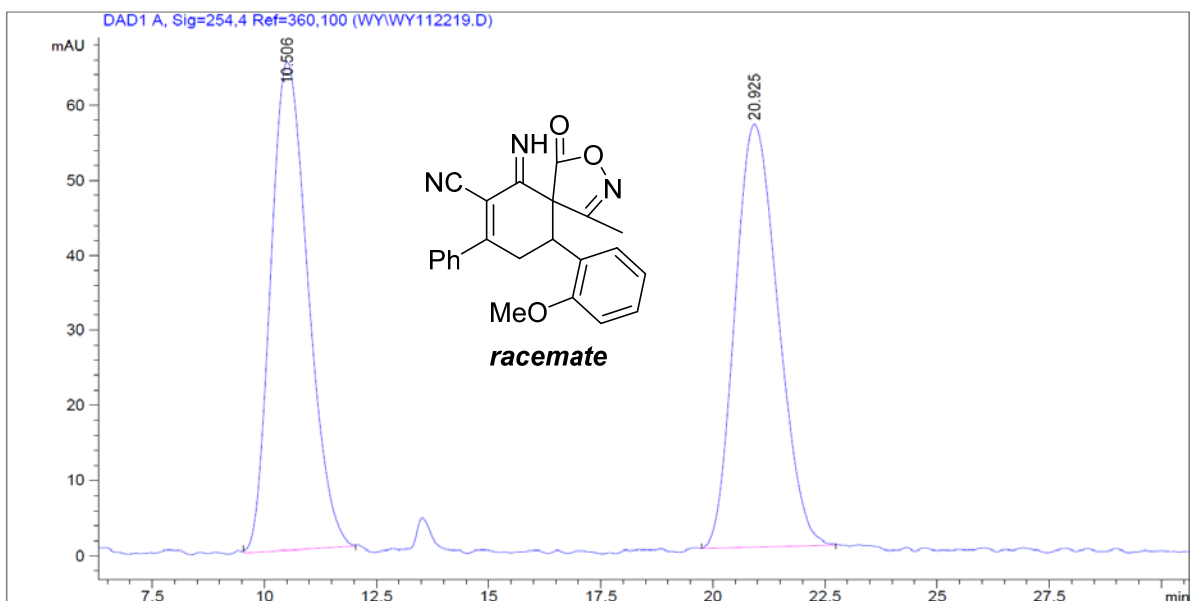

| Peak # | RetTime [min] | Type | Width [min] | Area [mAU*s] | Height [mAU] | Area %  |
|--------|---------------|------|-------------|--------------|--------------|---------|
| 1      | 10.506        | BB   | 0.8436      | 3750.07642   | 64.95065     | 49.9202 |
| 2      | 20.925        | BB   | 0.9255      | 3762.06934   | 56.30492     | 50.0798 |

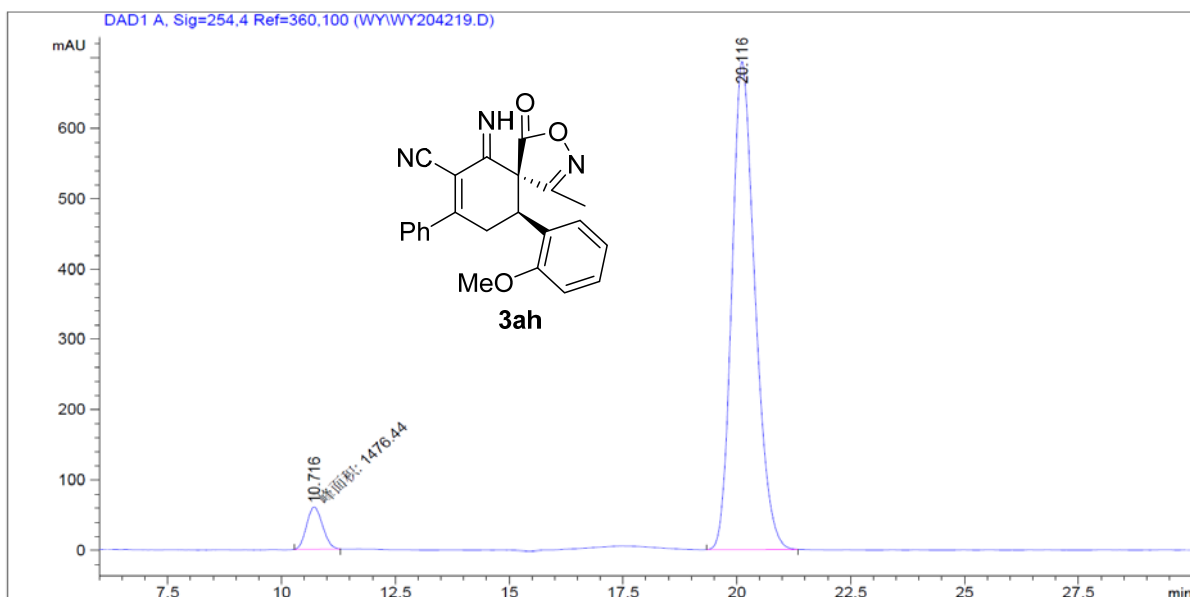

| Peak # | RetTime [min] | Type | Width [min] | Area [mAU*s] | Height [mAU] | Area %  |
|--------|---------------|------|-------------|--------------|--------------|---------|
| 1      | 10.716        | MM   | 0.4106      | 1476.44458   | 59.92375     | 5.6845  |
| 2      | 20.116        | BB   | 0.5341      | 2.44967e4    | 693.51447    | 94.3155 |

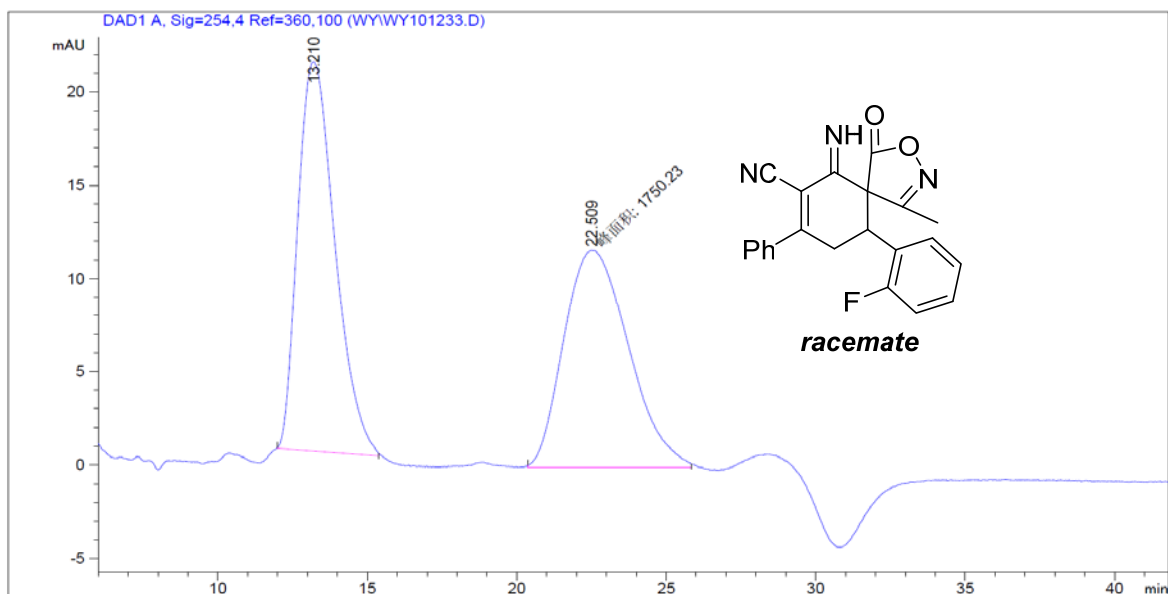

| Peak # | RetTime [min] | Type | Width [min] | Area [mAU*s] | Height [mAU] | Area %  |
|--------|---------------|------|-------------|--------------|--------------|---------|
| 1      | 13.210        | BB   | 1.0215      | 1803.43787   | 20.88284     | 50.7486 |
| 2      | 22.509        | MM   | 2.5023      | 1750.23059   | 11.65732     | 49.2514 |

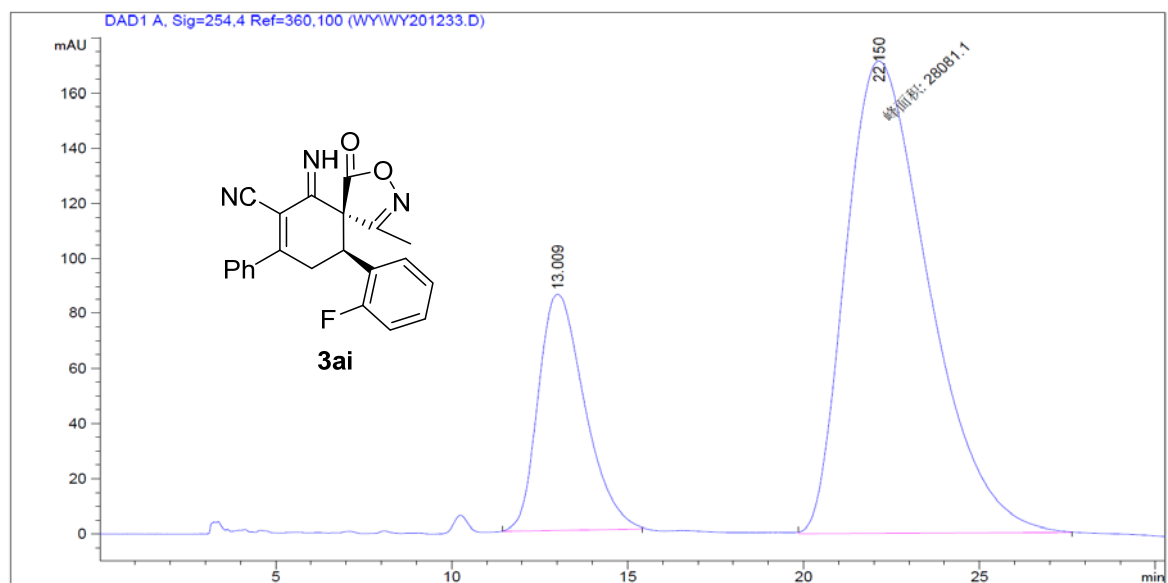

| Peak # | RetTime [min] | Type | Width [min] | Area [mAU*s] | Height [mAU] | Area %  |
|--------|---------------|------|-------------|--------------|--------------|---------|
| 1      | 13.009        | BB   | 1.3432      | 7849.12109   | 85.96470     | 21.8454 |
| 2      | 22.150        | MM   | 2.7302      | 2.80811e4    | 171.42064    | 78.1546 |



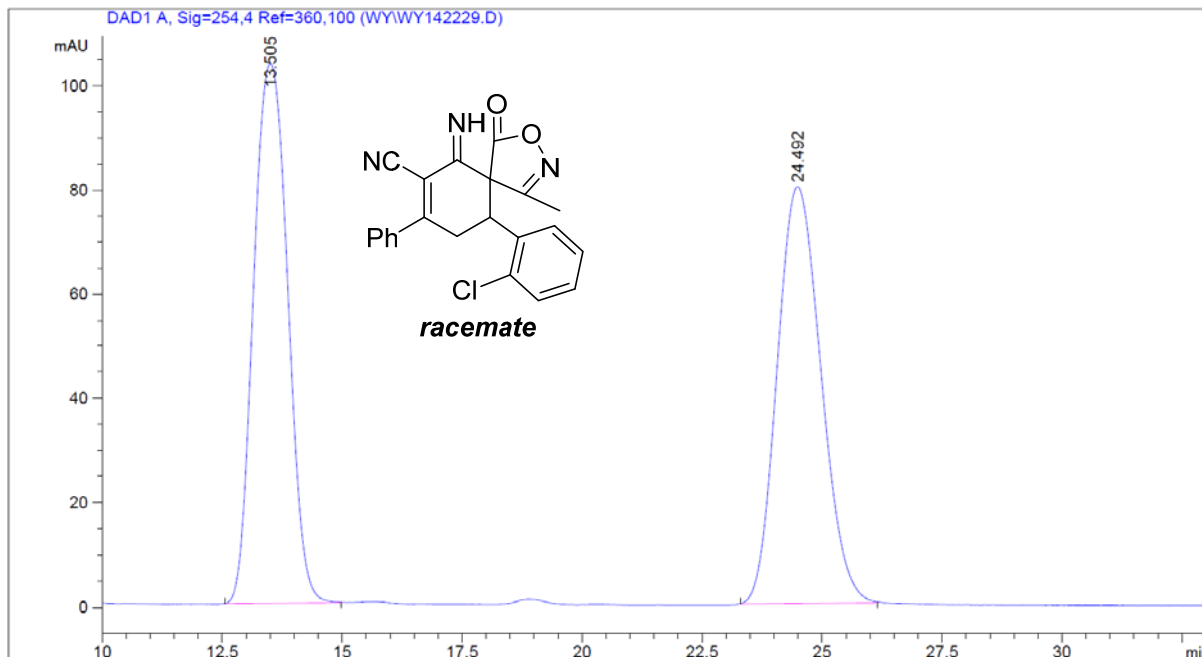

| Peak # | RetTime [min] | Type | Width [min] | Area [mAU*s] | Height [mAU] | Area %  |
|--------|---------------|------|-------------|--------------|--------------|---------|
| 1      | 13.505        | BB   | 0.7978      | 5110.86914   | 103.55353    | 50.2741 |
| 2      | 24.492        | BB   | 0.9858      | 5055.13623   | 79.93973     | 49.7259 |

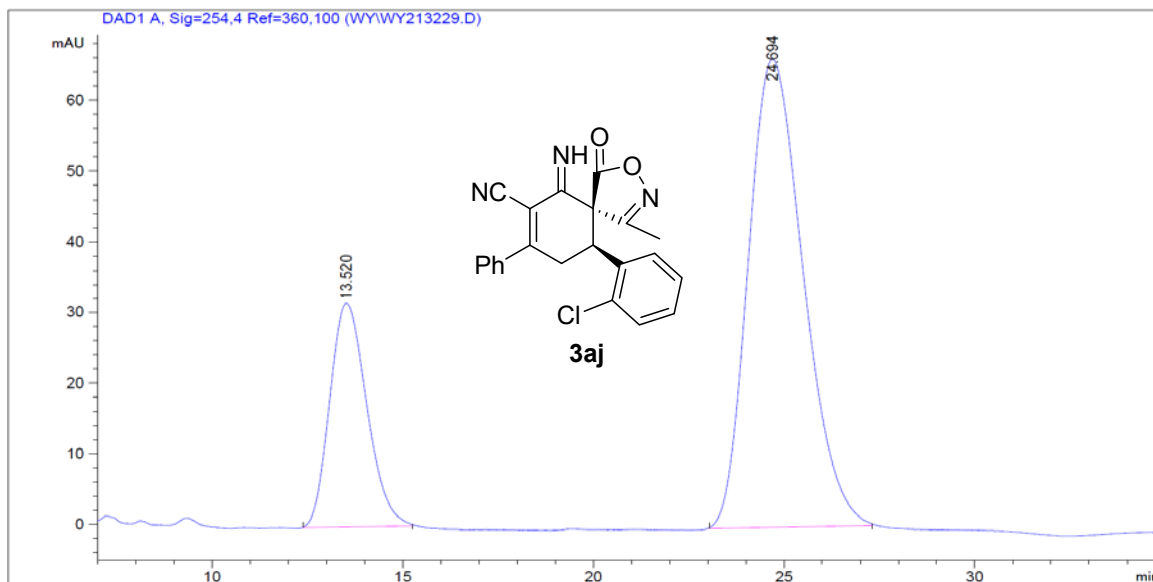

| Peak # | RetTime [min] | Type | Width [min] | Area [mAU*s] | Height [mAU] | Area %  |
|--------|---------------|------|-------------|--------------|--------------|---------|
| 1      | 13.520        | BB   | 0.9909      | 2137.66016   | 31.69368     | 24.3750 |
| 2      | 24.694        | BB   | 1.3859      | 6632.23584   | 66.25448     | 75.6250 |

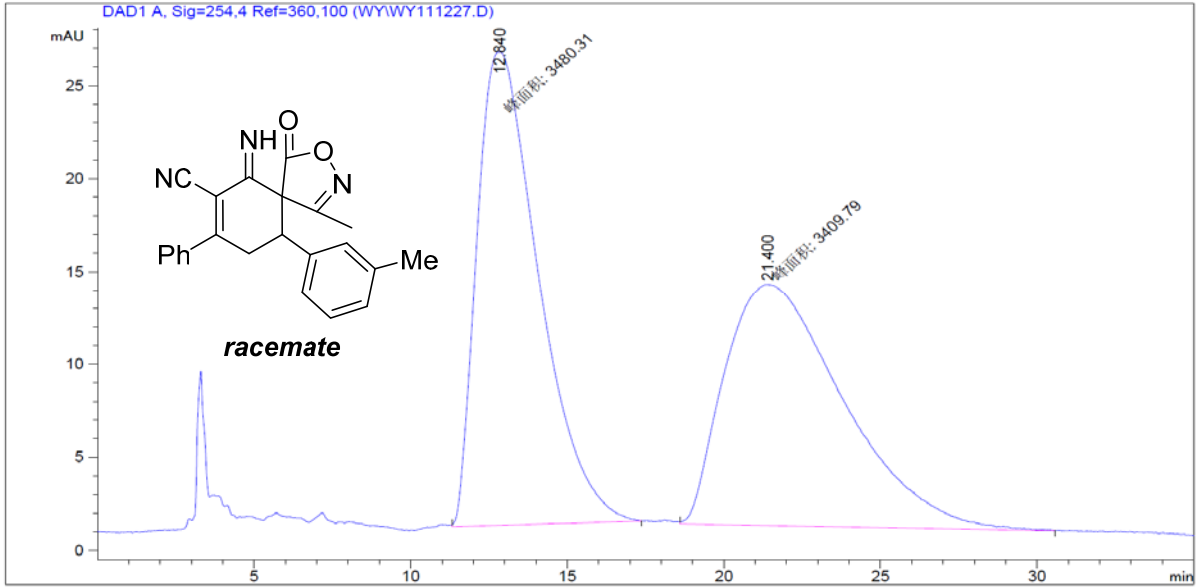

| Peak # | RetTime [min] | Type | Width [min] | Area [mAU*s] | Height [mAU] | Area %  |
|--------|---------------|------|-------------|--------------|--------------|---------|
| 1      | 12.840        | MM   | 2.2804      | 3480.31372   | 25.43592     | 50.5118 |
| 2      | 21.400        | MM   | 4.3786      | 3409.78735   | 12.97886     | 49.4882 |

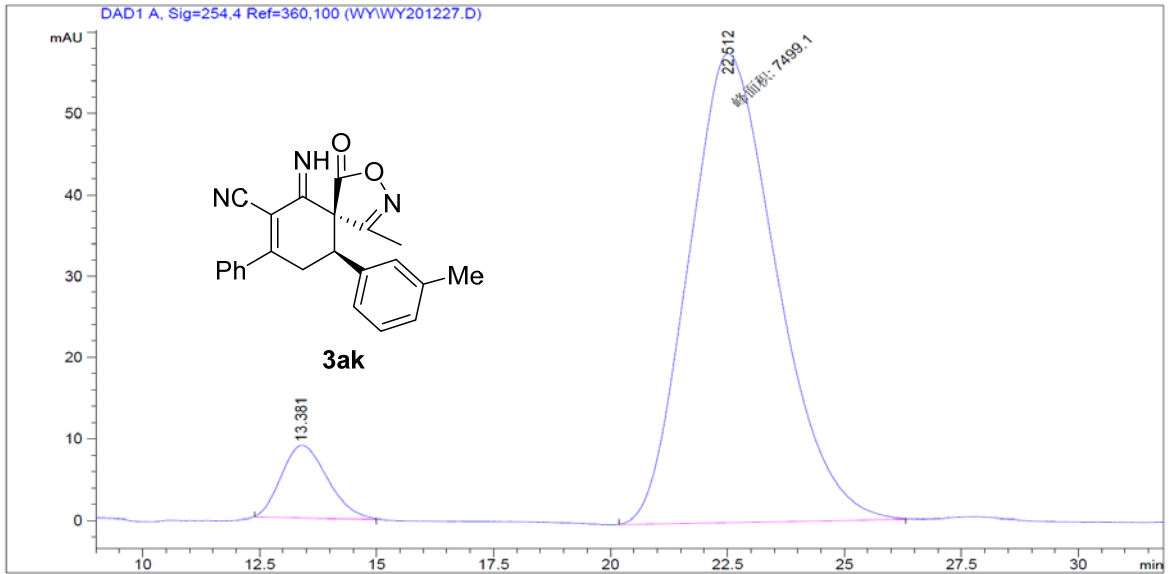

| Peak # | RetTime [min] | Type | Width [min] | Area [mAU*s] | Height [mAU] | Area %  |
|--------|---------------|------|-------------|--------------|--------------|---------|
| 1      | 13.381        | BB   | 0.8169      | 610.55951    | 8.87215      | 7.5288  |
| 2      | 22.512        | MM   | 2.1703      | 7499.09521   | 57.59002     | 92.4712 |

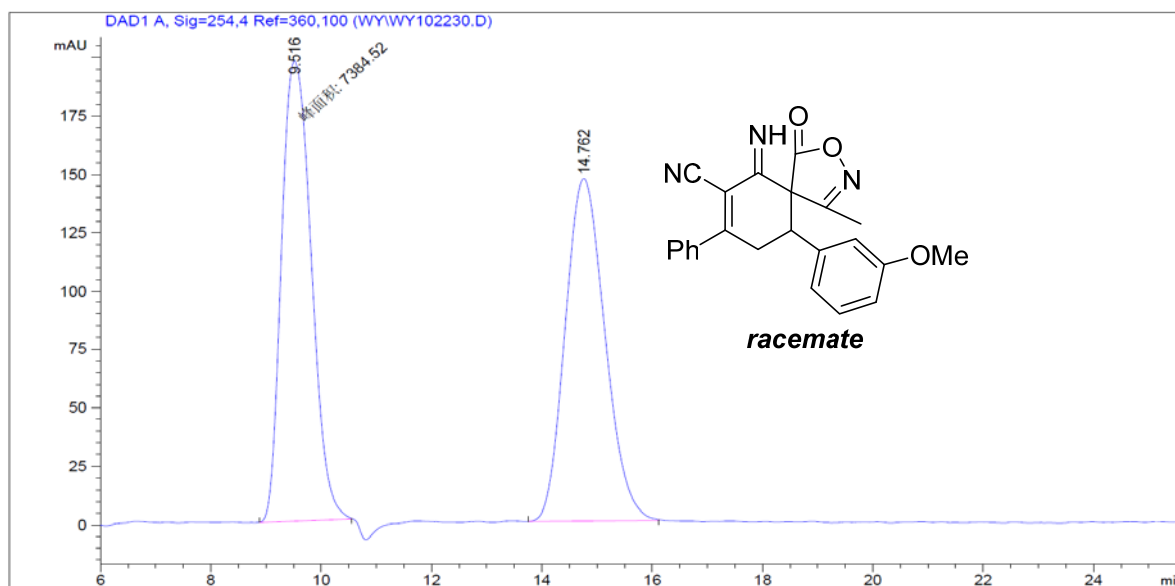

| Peak # | RetTime [min] | Type | Width [min] | Area [mAU*s] | Height [mAU] | Area %  |
|--------|---------------|------|-------------|--------------|--------------|---------|
| 1      | 9.516         | MM   | 0.6254      | 7384.52002   | 196.78851    | 50.1426 |
| 2      | 14.762        | BB   | 0.7661      | 7342.51074   | 146.65277    | 49.8574 |

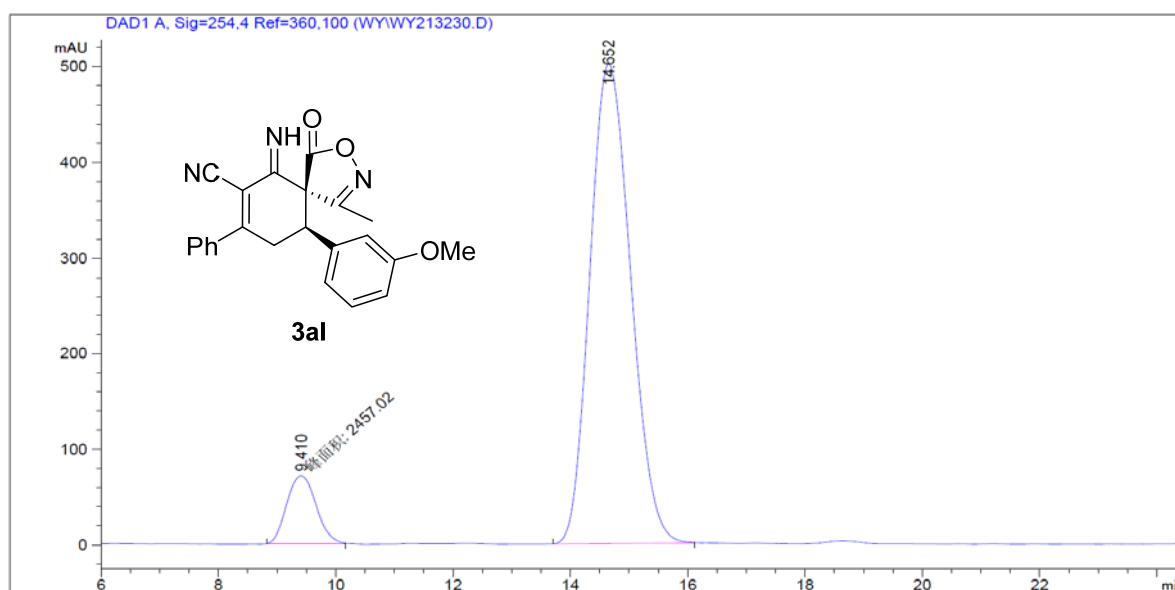

| Peak # | RetTime [min] | Type | Width [min] | Area [mAU*s] | Height [mAU] | Area %  |
|--------|---------------|------|-------------|--------------|--------------|---------|
| 1      | 9.410         | MM   | 0.5775      | 2457.01978   | 70.90916     | 9.2064  |
| 2      | 14.652        | BB   | 0.7635      | 2.42313e4    | 501.66245    | 90.7936 |

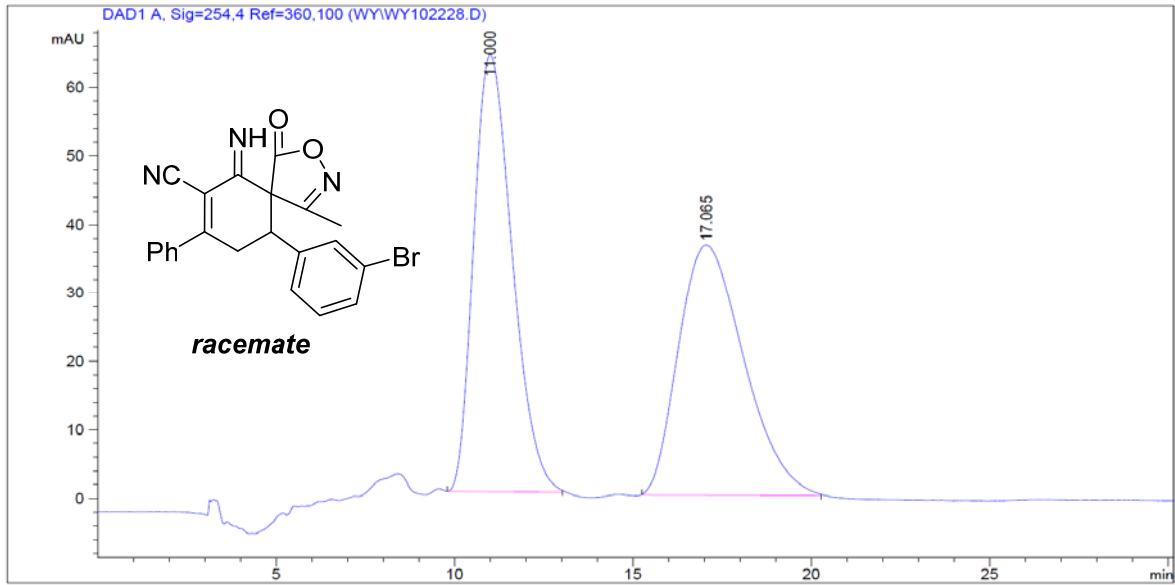

| Peak # | RetTime [min] | Type | Width [min] | Area [mAU*s] | Height [mAU] | Area %  |
|--------|---------------|------|-------------|--------------|--------------|---------|
| 1      | 11.000        | BB   | 1.1120      | 4775.97949   | 63.75285     | 50.6707 |
| 2      | 17.065        | BB   | 1.4995      | 4649.54980   | 36.51720     | 49.3293 |

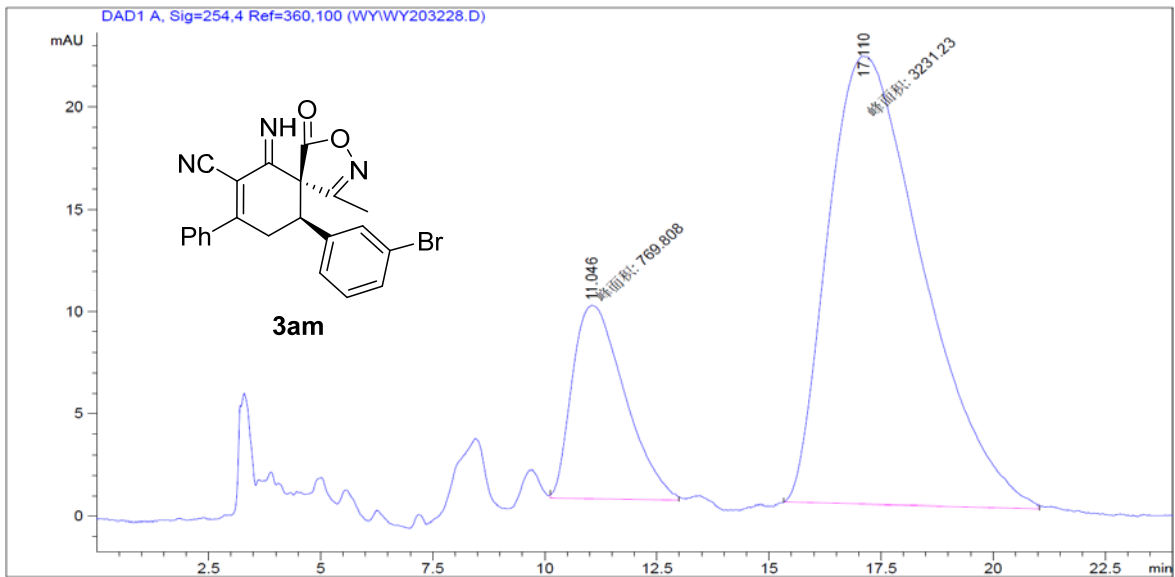

| Peak # | RetTime [min] | Type | Width [min] | Area [mAU*s] | Height [mAU] | Area %  |
|--------|---------------|------|-------------|--------------|--------------|---------|
| 1      | 11.046        | MM   | 1.3560      | 769.80768    | 9.46145      | 19.2402 |
| 2      | 17.110        | MM   | 2.4629      | 3231.22607   | 21.86613     | 80.7598 |

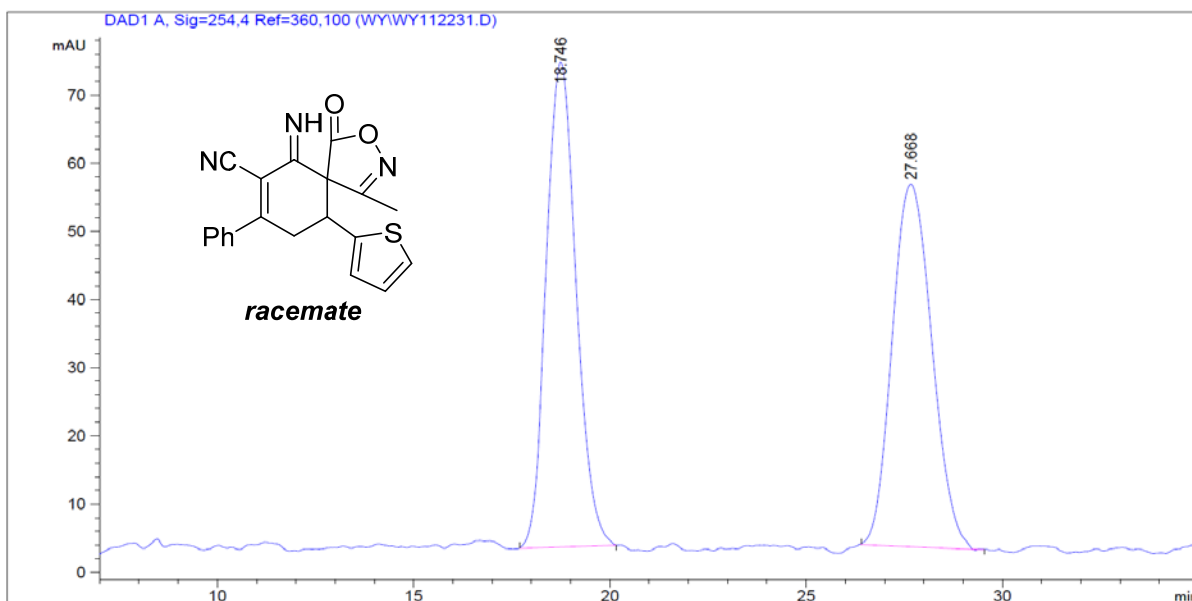

| Peak # | RetTime [min] | Type | Width [min] | Area [mAU*s] | Height [mAU] | Area %  |
|--------|---------------|------|-------------|--------------|--------------|---------|
| 1      | 18.746        | BB   | 0.8311      | 3774.50073   | 71.12998     | 50.2210 |
| 2      | 27.668        | BB   | 0.9306      | 3741.28711   | 53.18829     | 49.7790 |

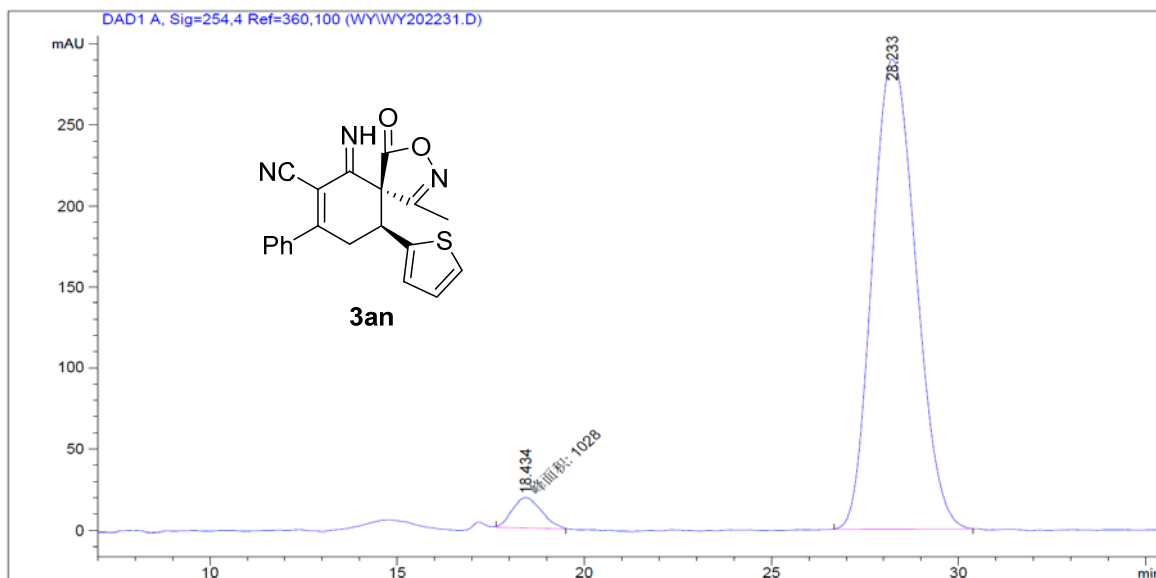

| Peak # | RetTime [min] | Type | Width [min] | Area [mAU*s] | Height [mAU] | Area %  |
|--------|---------------|------|-------------|--------------|--------------|---------|
| 1      | 18.434        | MM   | 0.9180      | 1028.00427   | 18.66287     | 4.2124  |
| 2      | 28.233        | BB   | 1.2591      | 2.33764e4    | 289.78394    | 95.7876 |

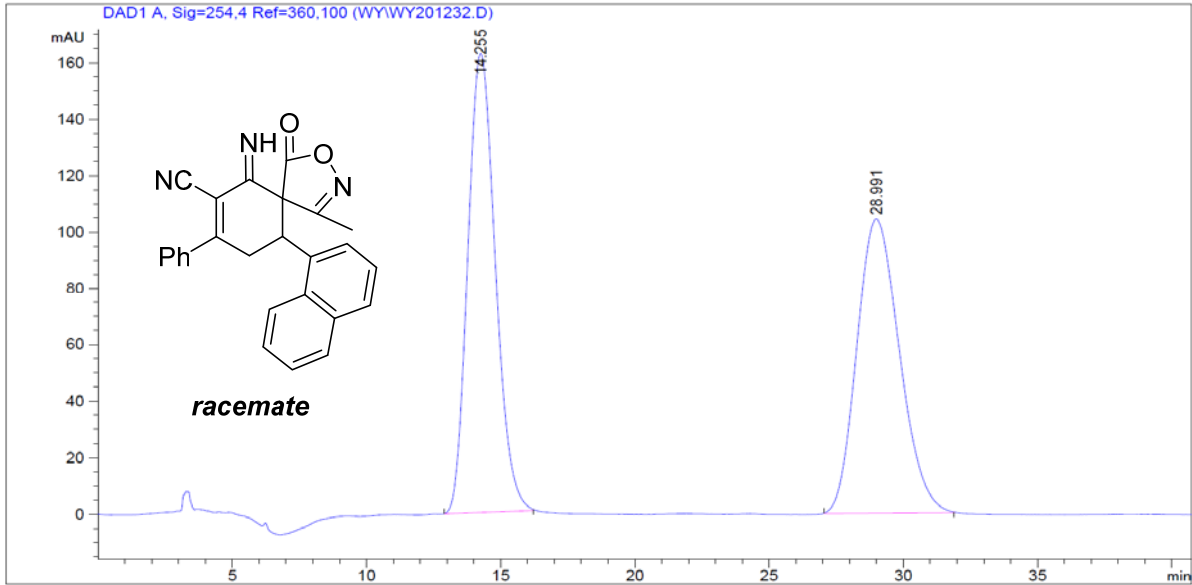

| Peak # | RetTime [min] | Type | Width [min] | Area [mAU*s] | Height [mAU] | Area %  |
|--------|---------------|------|-------------|--------------|--------------|---------|
| 1      | 14.255        | BB   | 1.1000      | 1.15731e4    | 162.66670    | 50.1812 |
| 2      | 28.991        | BB   | 1.5501      | 1.14895e4    | 104.22237    | 49.8188 |

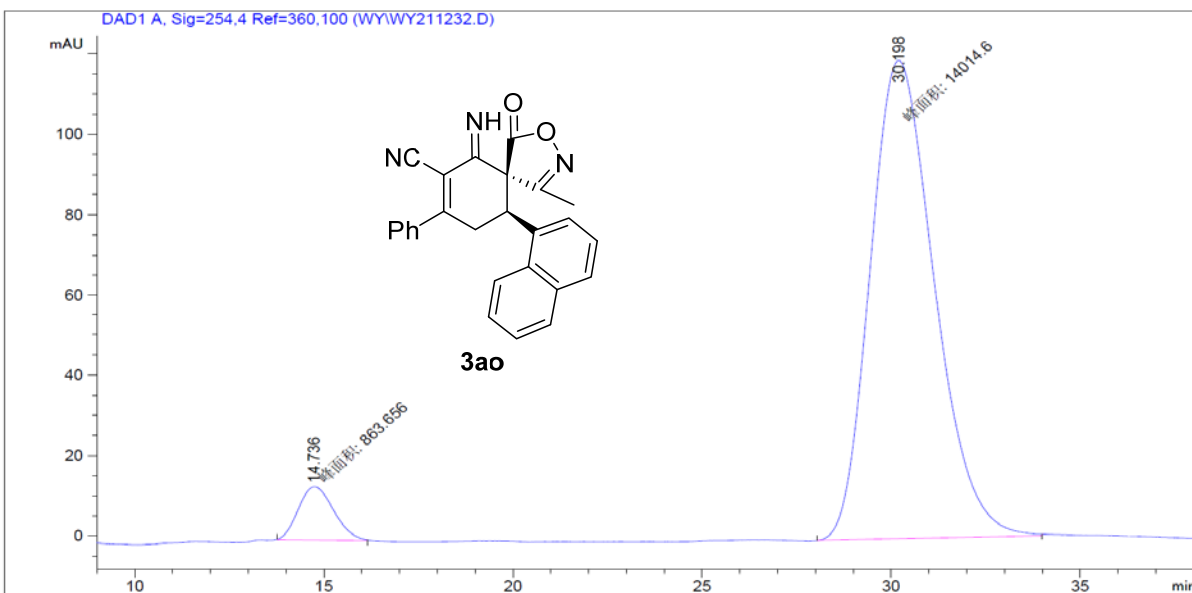

| Peak # | RetTime [min] | Type | Width [min] | Area [mAU*s] | Height [mAU] | Area %  |
|--------|---------------|------|-------------|--------------|--------------|---------|
| 1      | 14.736        | MM   | 1.0820      | 863.65570    | 13.30365     | 5.8048  |
| 2      | 30.198        | MM   | 1.9633      | 1.40146e4    | 118.97267    | 94.1952 |

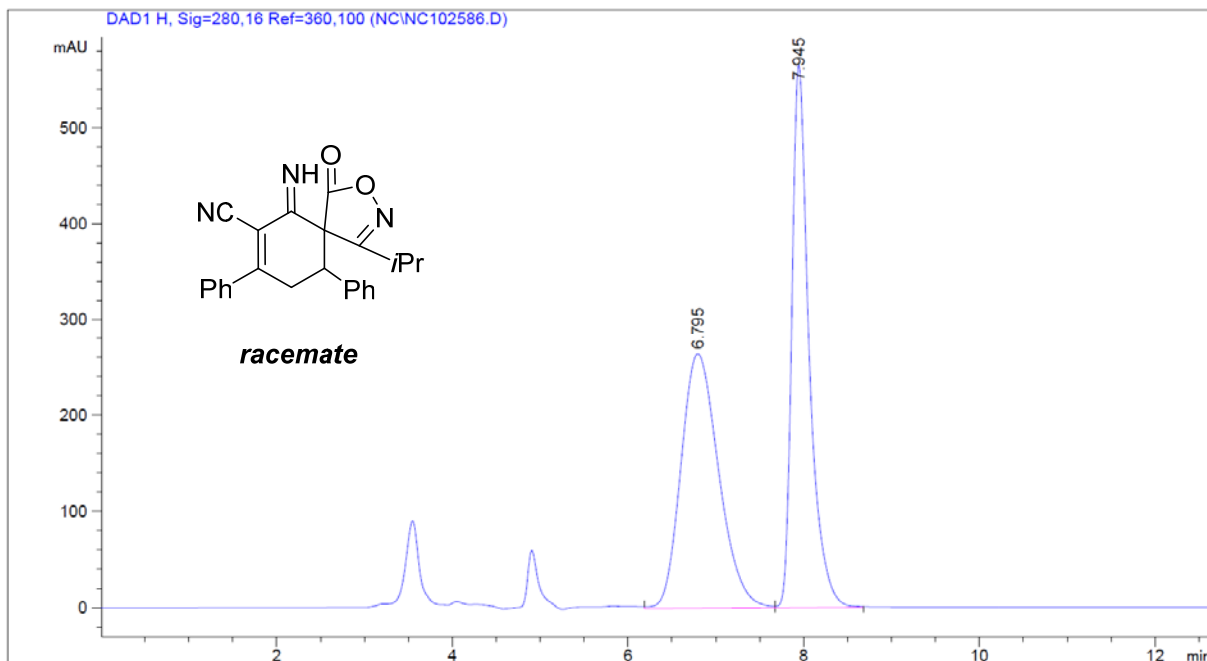

| Peak # | RetTime [min] | Type | Width [min] | Area [mAU*s] | Height [mAU] | Area %  |
|--------|---------------|------|-------------|--------------|--------------|---------|
| 1      | 6.795         | VV   | 0.4643      | 7891.34326   | 264.29288    | 50.5531 |
| 2      | 7.945         | VB   | 0.2032      | 7718.66064   | 565.65802    | 49.4469 |

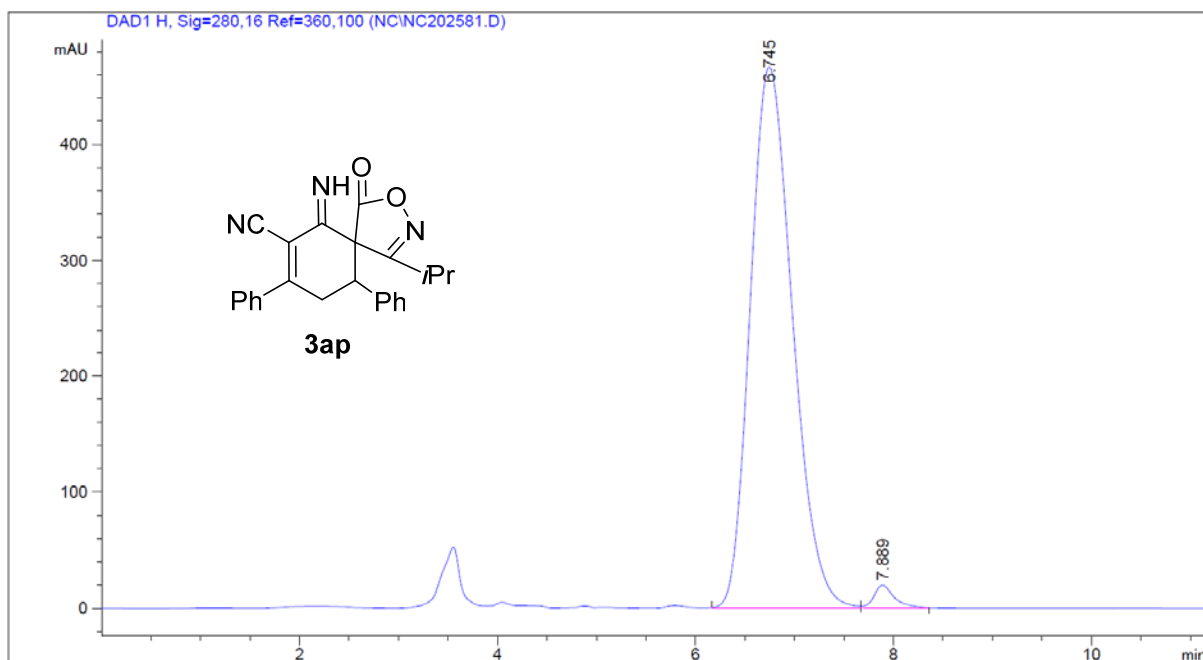

| Peak # | RetTime [min] | Type | Width [min] | Area [mAU*s] | Height [mAU] | Area %  |
|--------|---------------|------|-------------|--------------|--------------|---------|
| 1      | 6.745         | BV   | 0.4602      | 1.37561e4    | 466.21072    | 98.0234 |
| 2      | 7.889         | VB   | 0.2098      | 277.38058    | 19.51855     | 1.9766  |

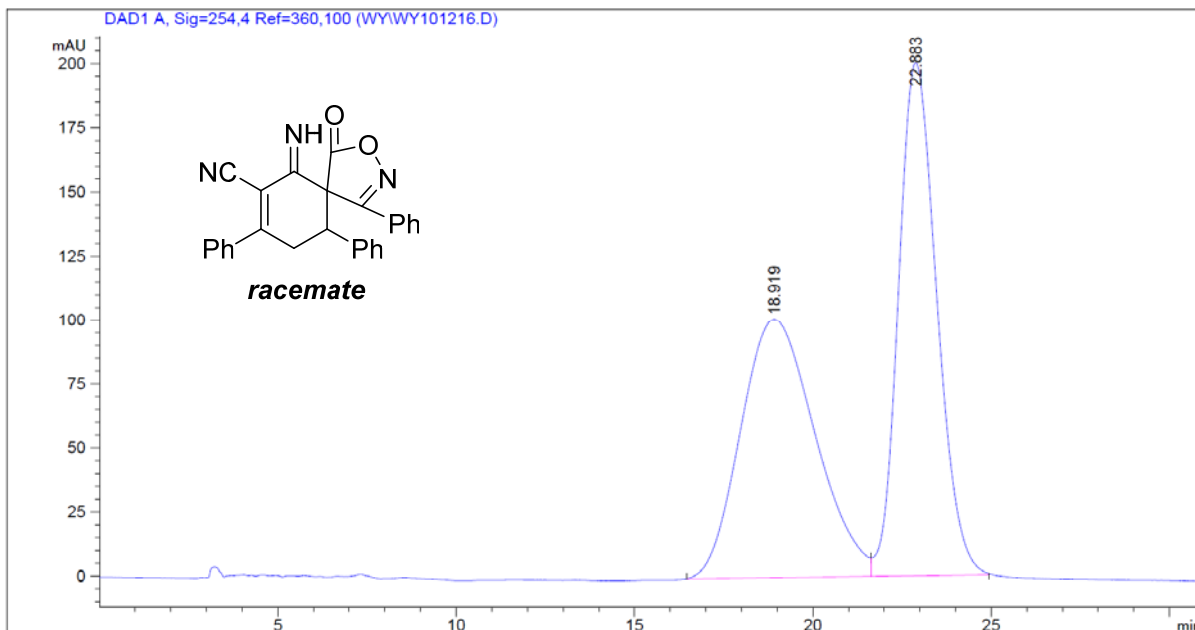

| Peak # | RetTime [min] | Type | Width [min] | Area [mAU*s] | Height [mAU] | Area %  |
|--------|---------------|------|-------------|--------------|--------------|---------|
| 1      | 18.919        | BV   | 1.8017      | 1.46104e4    | 100.99961    | 49.4417 |
| 2      | 22.883        | VB   | 1.1486      | 1.49404e4    | 200.20671    | 50.5583 |

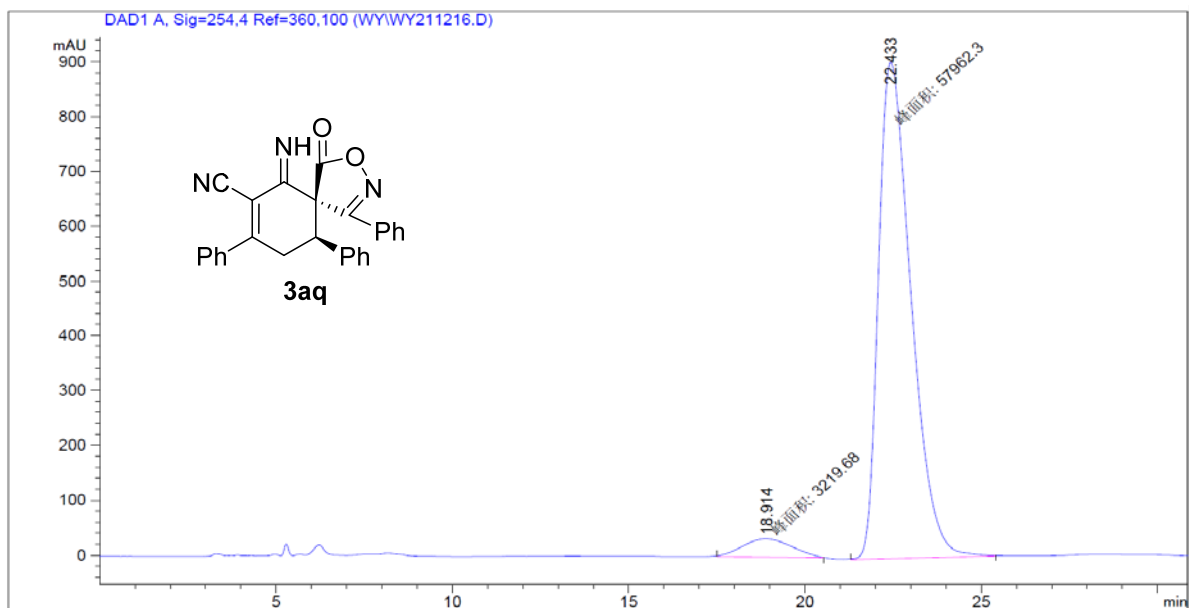

| Peak # | RetTime [min] | Type | Width [min] | Area [mAU*s] | Height [mAU] | Area %  |
|--------|---------------|------|-------------|--------------|--------------|---------|
| 1      | 18.914        | MM   | 1.6132      | 3219.68408   | 33.26468     | 5.2625  |
| 2      | 22.433        | MM   | 1.0665      | 5.79623e4    | 905.77771    | 94.7375 |



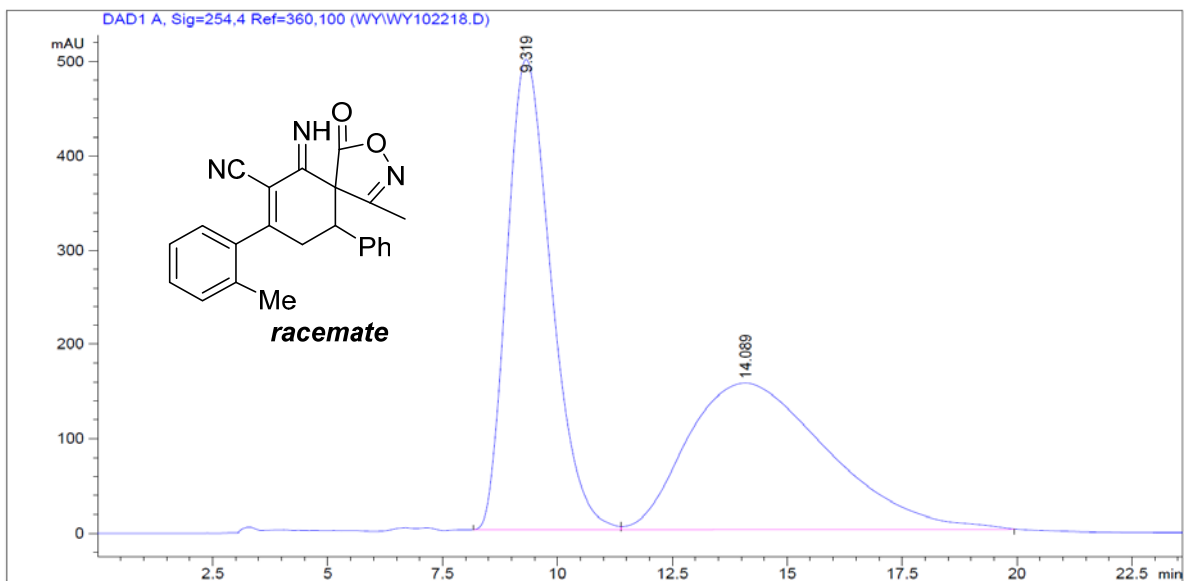

| Peak # | RetTime [min] | Type | Width [min] | Area [mAU*s] | Height [mAU] | Area %  |
|--------|---------------|------|-------------|--------------|--------------|---------|
| 1      | 9.319         | BB   | 1.0173      | 3.34830e4    | 498.70706    | 50.2189 |
| 2      | 14.089        | BB   | 2.5474      | 3.31910e4    | 155.42696    | 49.7811 |

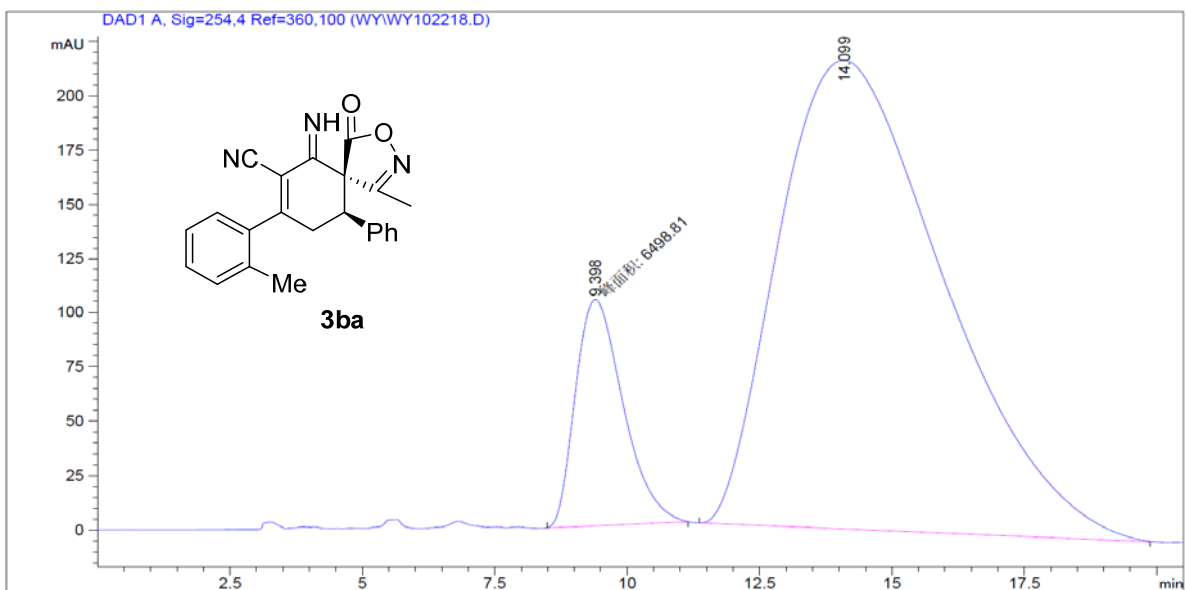

| Peak # | RetTime [min] | Type | Width [min] | Area [mAU*s] | Height [mAU] | Area %  |
|--------|---------------|------|-------------|--------------|--------------|---------|
| 1      | 9.398         | MM   | 1.0443      | 6498.81201   | 103.71588    | 12.2216 |
| 2      | 14.099        | BB   | 2.5428      | 4.66760e4    | 215.50917    | 87.7784 |

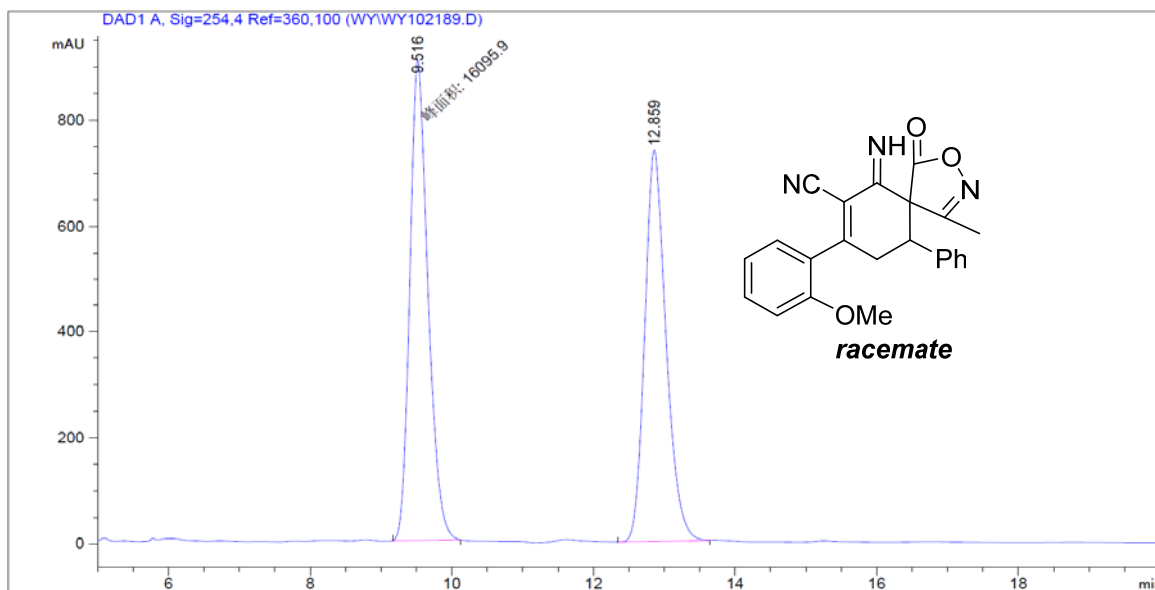

| Peak # | RetTime [min] | Type | Width [min] | Area [mAU*s] | Height [mAU] | Area %  |
|--------|---------------|------|-------------|--------------|--------------|---------|
| 1      | 9.516         | MM   | 0.2957      | 1.60959e4    | 907.08929    | 51.0601 |
| 2      | 12.859        | VB   | 0.3133      | 1.54276e4    | 739.77148    | 48.9399 |

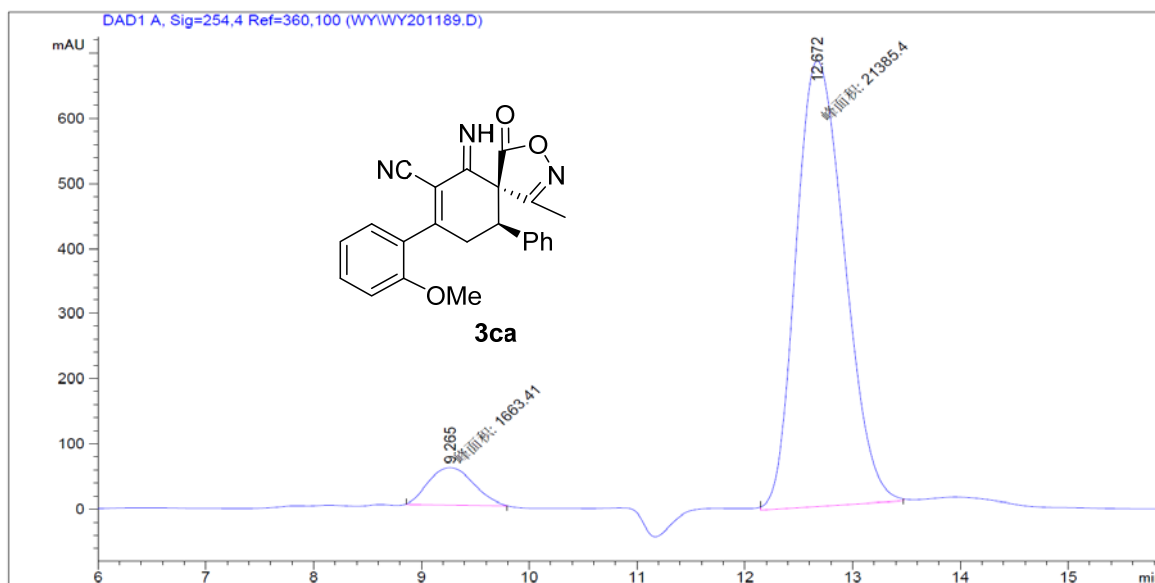

| Peak # | RetTime [min] | Type | Width [min] | Area [mAU*s] | Height [mAU] | Area %  |
|--------|---------------|------|-------------|--------------|--------------|---------|
| 1      | 9.265         | MM   | 0.4856      | 1663.40613   | 57.09542     | 7.2169  |
| 2      | 12.672        | MM   | 0.5210      | 2.13854e4    | 684.07593    | 92.7831 |

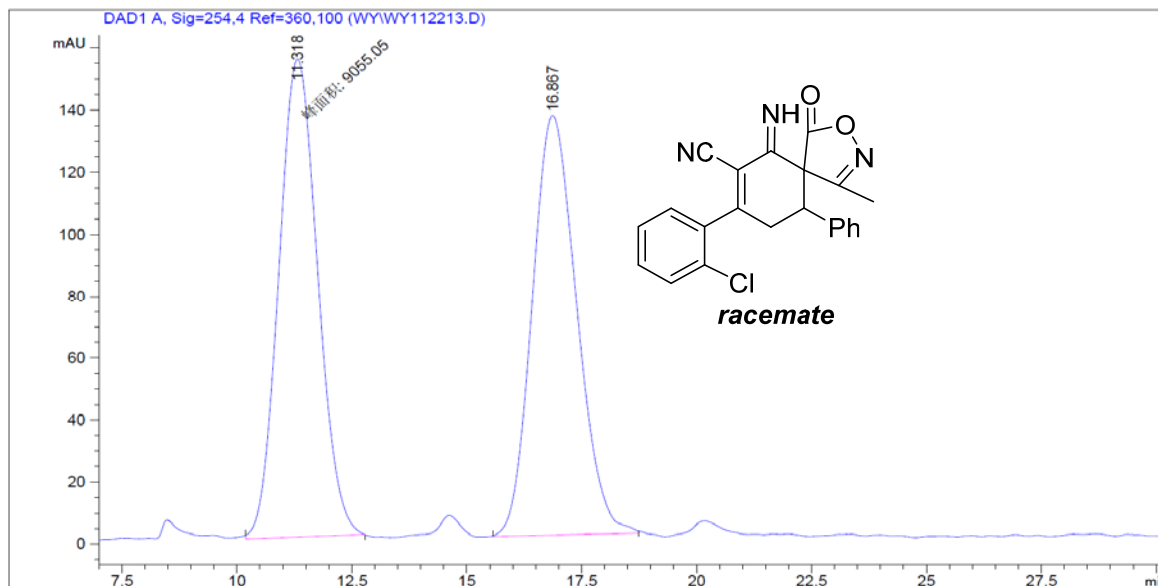

| Peak # | RetTime [min] | Type | Width [min] | Area [mAU*s] | Height [mAU] | Area %  |
|--------|---------------|------|-------------|--------------|--------------|---------|
| 1      | 11.318        | MM   | 0.9791      | 9055.05469   | 154.13698    | 49.9045 |
| 2      | 16.867        | BB   | 1.0117      | 9089.70020   | 135.31770    | 50.0955 |

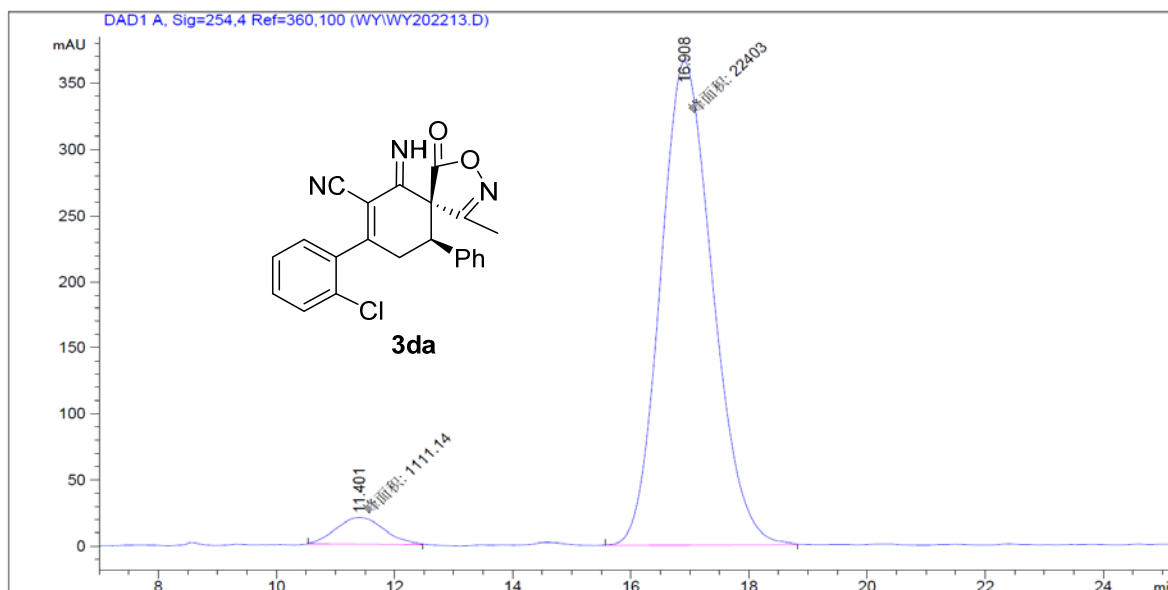

| Peak # | RetTime [min] | Type | Width [min] | Area [mAU*s] | Height [mAU] | Area %  |
|--------|---------------|------|-------------|--------------|--------------|---------|
| 1      | 11.401        | MM   | 0.9304      | 1111.13928   | 19.90432     | 4.7254  |
| 2      | 16.908        | MM   | 1.0211      | 2.24030e4    | 365.65015    | 95.2746 |

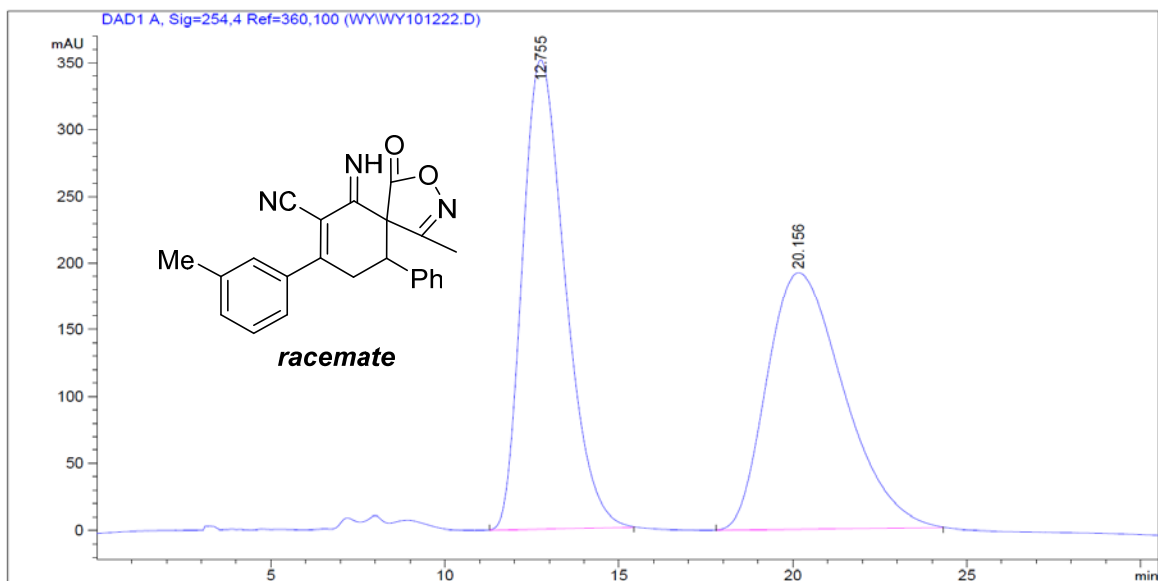

| Peak # | RetTime [min] | Type | Width [min] | Area [mAU*s] | Height [mAU] | Area %  |
|--------|---------------|------|-------------|--------------|--------------|---------|
| 1      | 12.755        | BB   | 1.2919      | 2.99996e4    | 351.42188    | 50.4309 |
| 2      | 20.156        | BB   | 2.0869      | 2.94870e4    | 192.09537    | 49.5691 |

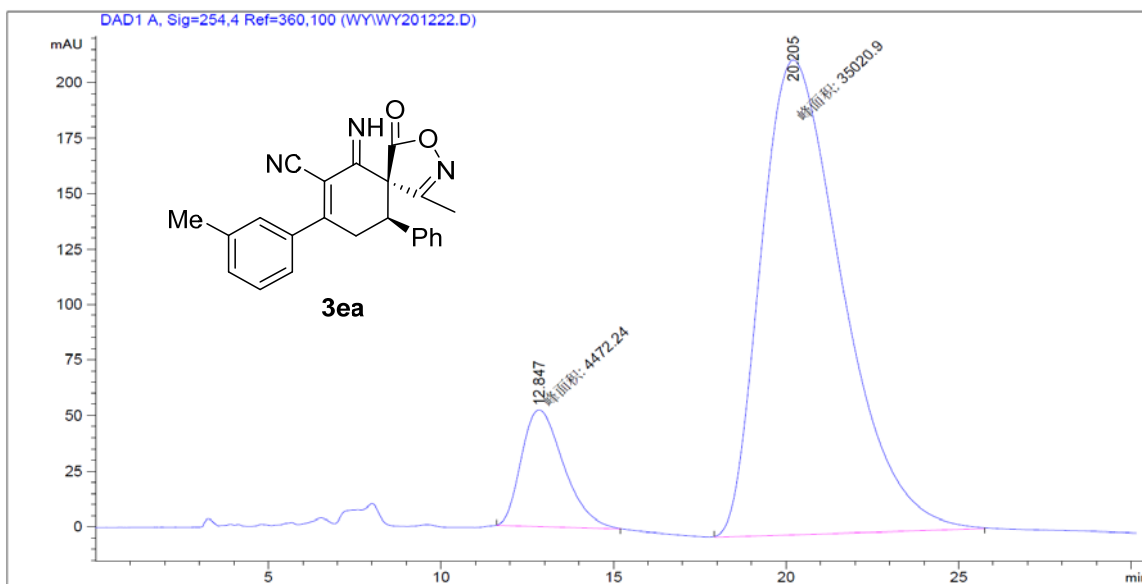

| Peak # | RetTime [min] | Type | Width [min] | Area [mAU*s] | Height [mAU] | Area %  |
|--------|---------------|------|-------------|--------------|--------------|---------|
| 1      | 12.847        | MM   | 1.4223      | 4472.24072   | 52.40461     | 11.3241 |
| 2      | 20.205        | MM   | 2.7326      | 3.50209e4    | 213.59589    | 88.6759 |

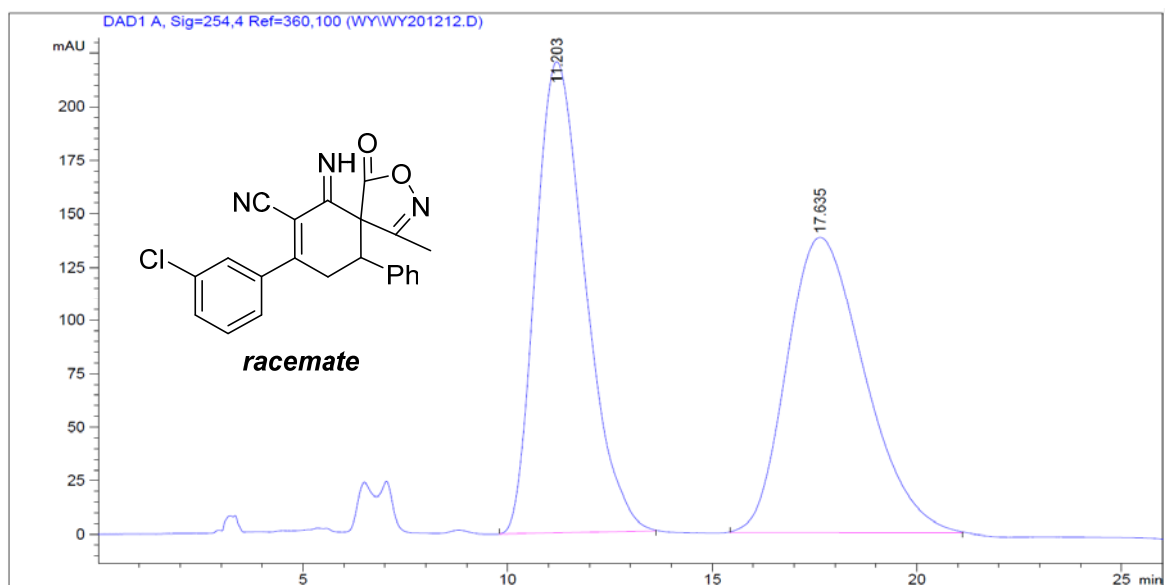

| Peak # | RetTime [min] | Type | Width [min] | Area [mAU*s] | Height [mAU] | Area %  |
|--------|---------------|------|-------------|--------------|--------------|---------|
| 1      | 11.203        | BB   | 1.2844      | 1.86342e4    | 220.38632    | 50.5049 |
| 2      | 17.635        | BB   | 1.8294      | 1.82616e4    | 138.40280    | 49.4951 |

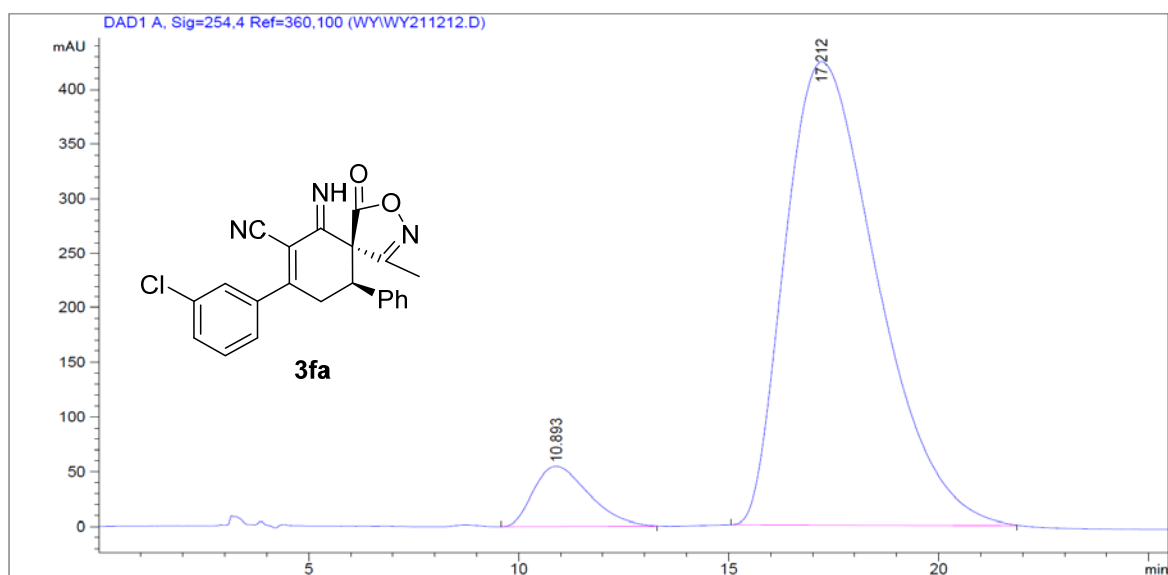

| Peak # | RetTime [min] | Type | Width [min] | Area [mAU*s] | Height [mAU] | Area %  |
|--------|---------------|------|-------------|--------------|--------------|---------|
| 1      | 10.893        | BB   | 1.0793      | 4998.43652   | 54.64012     | 7.1775  |
| 2      | 17.212        | BB   | 2.2198      | 6.46414e4    | 423.72876    | 92.8225 |

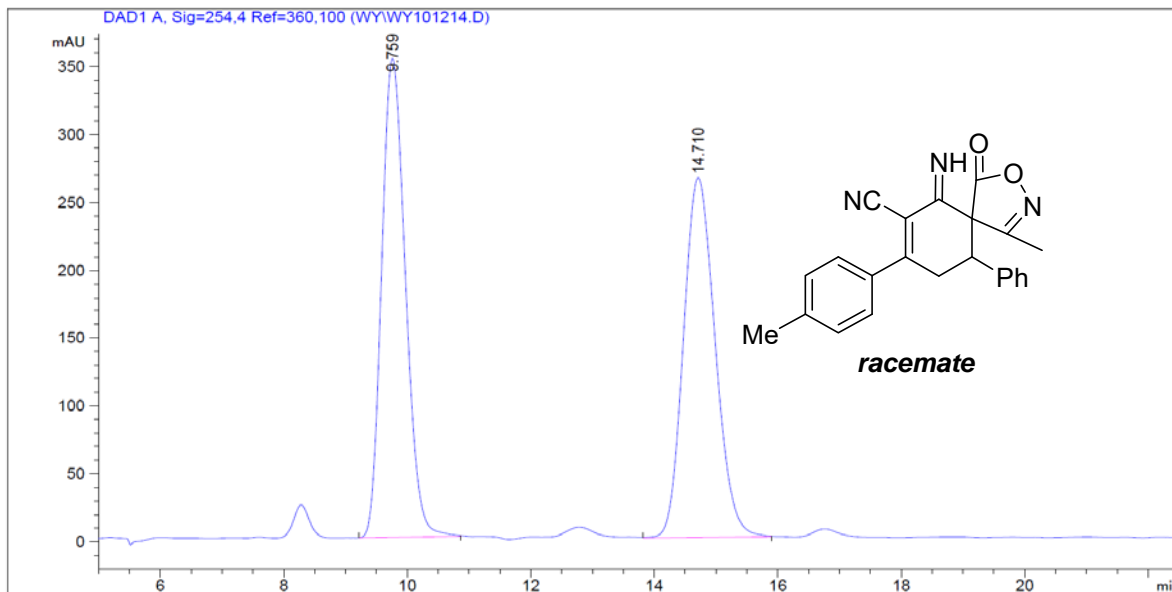

| Peak # | RetTime [min] | Type | Width [min] | Area [mAU*s] | Height [mAU] | Area %  |
|--------|---------------|------|-------------|--------------|--------------|---------|
| 1      | 9.759         | BB   | 0.4177      | 9421.15332   | 352.65833    | 49.9802 |
| 2      | 14.710        | VB   | 0.5570      | 9428.61230   | 265.06186    | 50.0198 |

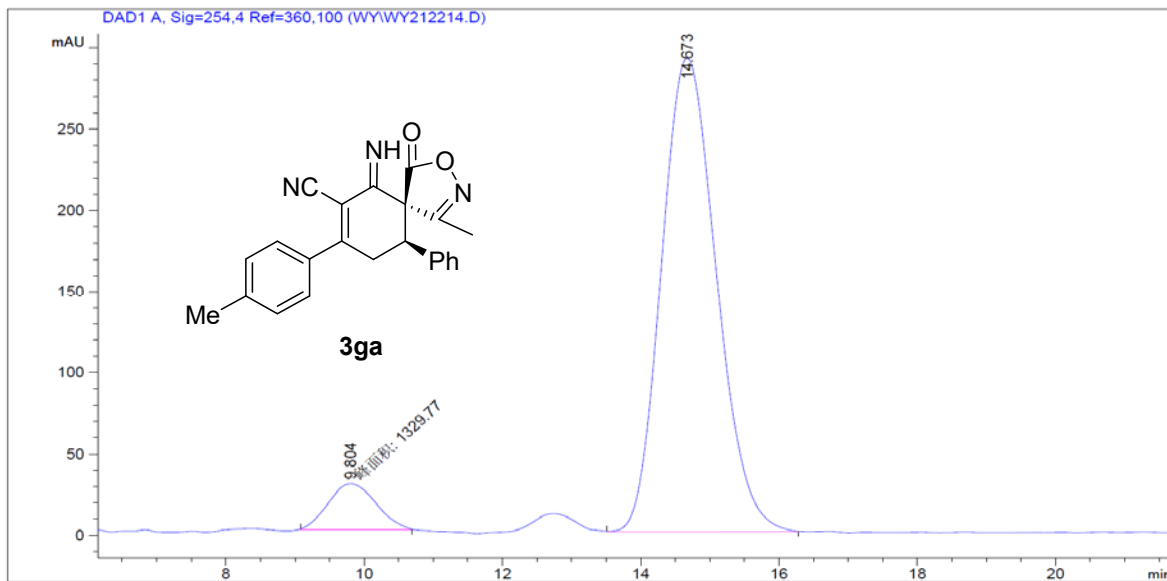

| Peak # | RetTime [min] | Type | Width [min] | Area [mAU*s] | Height [mAU] | Area %  |
|--------|---------------|------|-------------|--------------|--------------|---------|
| 1      | 9.804         | MM   | 0.7878      | 1329.77454   | 28.13284     | 7.6476  |
| 2      | 14.673        | VB   | 0.8443      | 1.60584e4    | 291.67145    | 92.3524 |

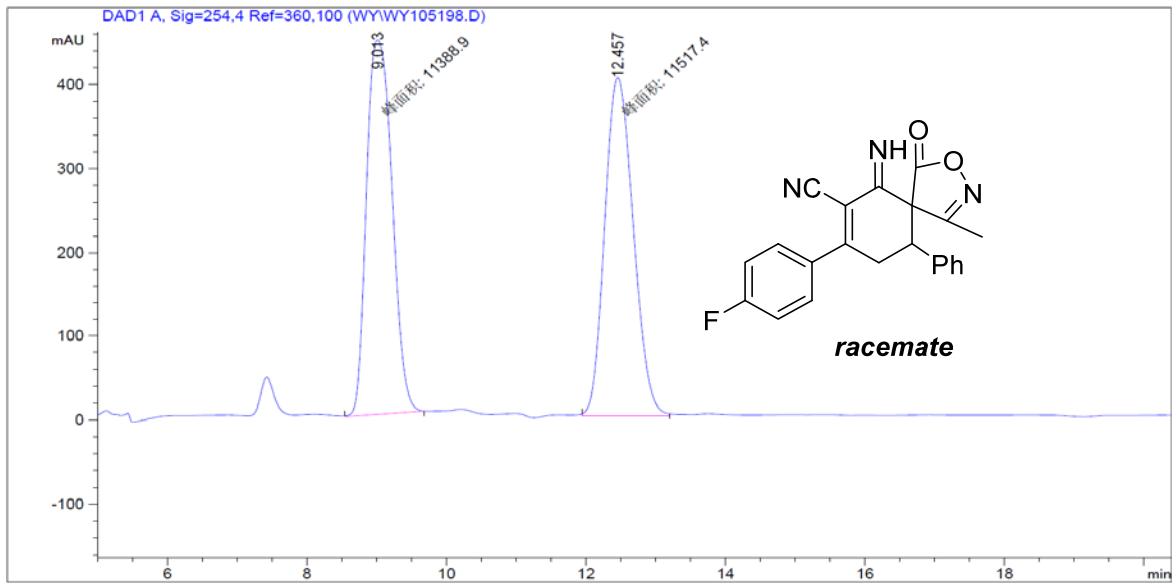

| Peak # | RetTime [min] | Type | Width [min] | Area [mAU*s] | Height [mAU] | Area %  |
|--------|---------------|------|-------------|--------------|--------------|---------|
| 1      | 9.013         | MM   | 0.4252      | 1.13889e4    | 446.38321    | 49.7196 |
| 2      | 12.457        | MM   | 0.4756      | 1.15174e4    | 403.59198    | 50.2804 |

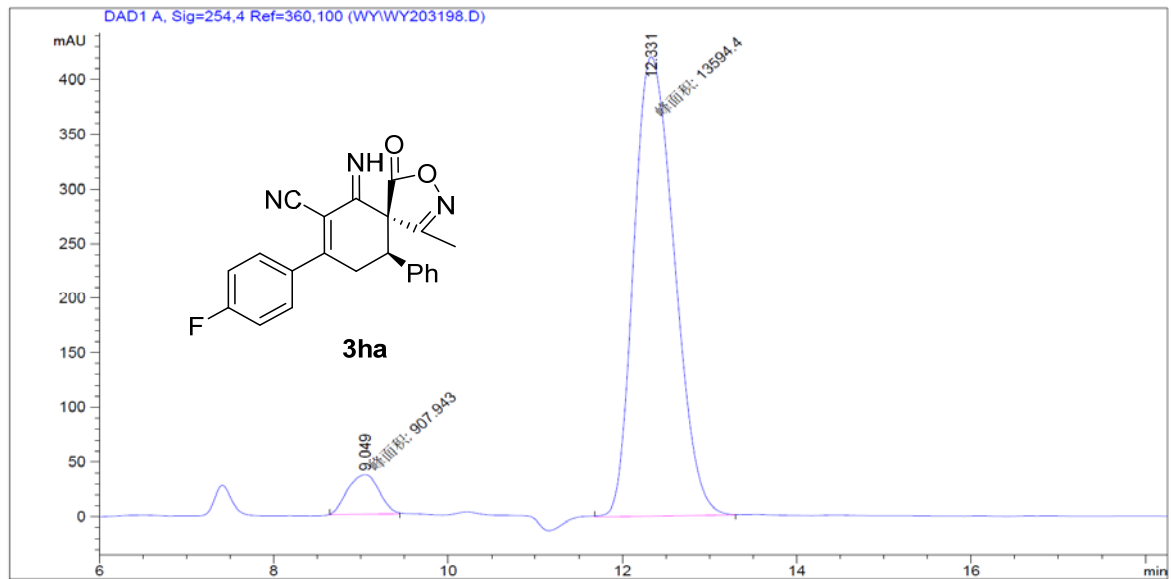

| Peak # | RetTime [min] | Type | Width [min] | Area [mAU*s] | Height [mAU] | Area %  |
|--------|---------------|------|-------------|--------------|--------------|---------|
| 1      | 9.049         | MM   | 0.4189      | 907.94324    | 36.12468     | 6.2606  |
| 2      | 12.331        | MM   | 0.5386      | 1.35944e4    | 420.64349    | 93.7394 |

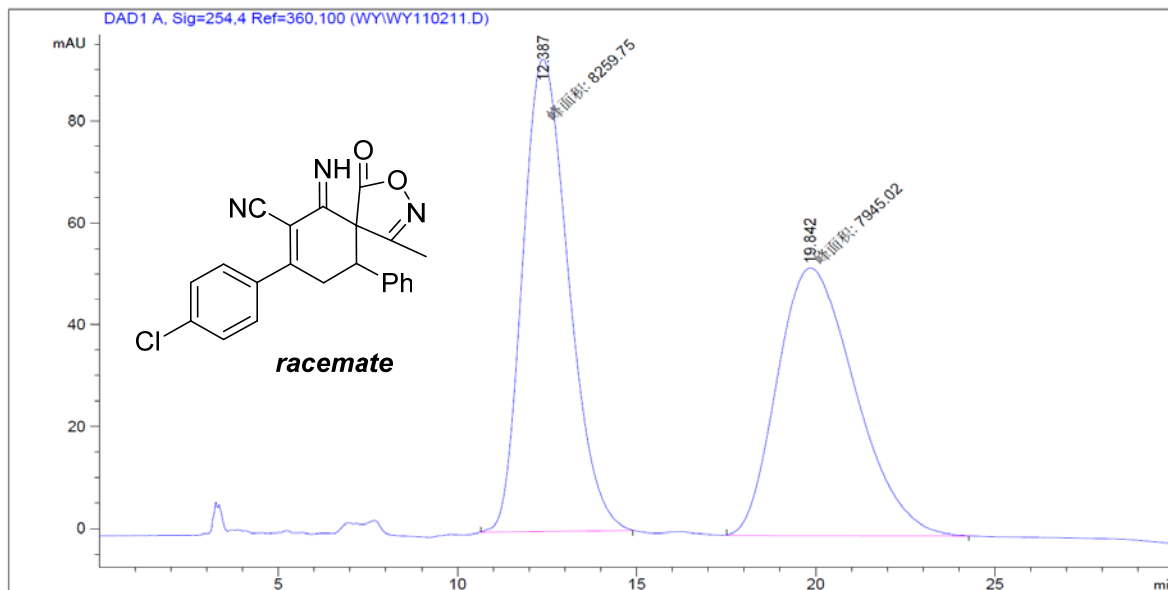

| Peak # | RetTime [min] | Type | Width [min] | Area [mAU*s] | Height [mAU] | Area %  |
|--------|---------------|------|-------------|--------------|--------------|---------|
| 1      | 12.387        | MM   | 1.4854      | 8259.75293   | 92.67703     | 50.9711 |
| 2      | 19.842        | MM   | 2.5199      | 7945.02393   | 52.54873     | 49.0289 |

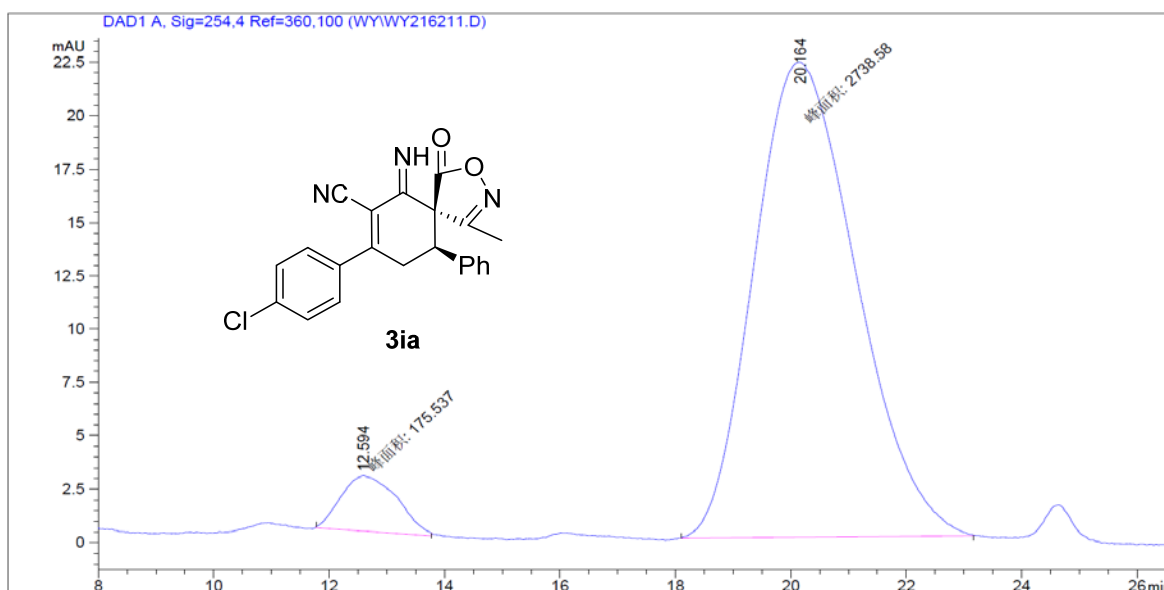

| Peak # | RetTime [min] | Type | Width [min] | Area [mAU*s] | Height [mAU] | Area %  |
|--------|---------------|------|-------------|--------------|--------------|---------|
| 1      | 12.594        | MM   | 1.1232      | 175.53683    | 2.60469      | 6.0237  |
| 2      | 20.164        | MM   | 2.0514      | 2738.57568   | 22.25016     | 93.9763 |



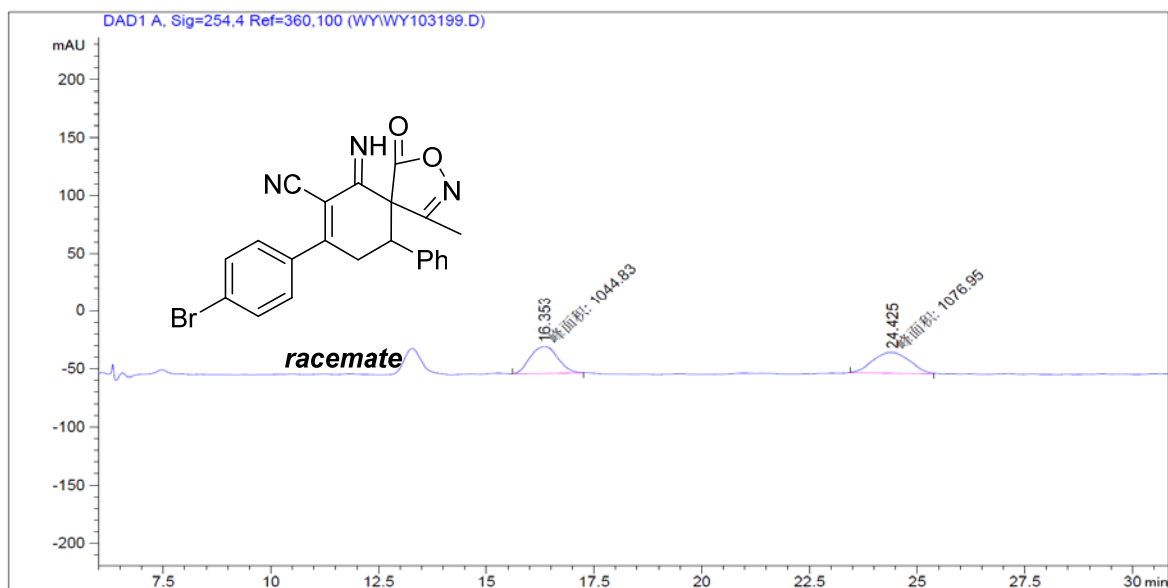

| Peak # | RetTime [min] | Type | Width [min] | Area [mAU*s] | Height [mAU] | Area %  |
|--------|---------------|------|-------------|--------------|--------------|---------|
| 1      | 16.353        | MM   | 0.7497      | 1044.83289   | 23.22872     | 49.2431 |
| 2      | 24.425        | MM   | 0.9986      | 1076.95081   | 17.97524     | 50.7569 |

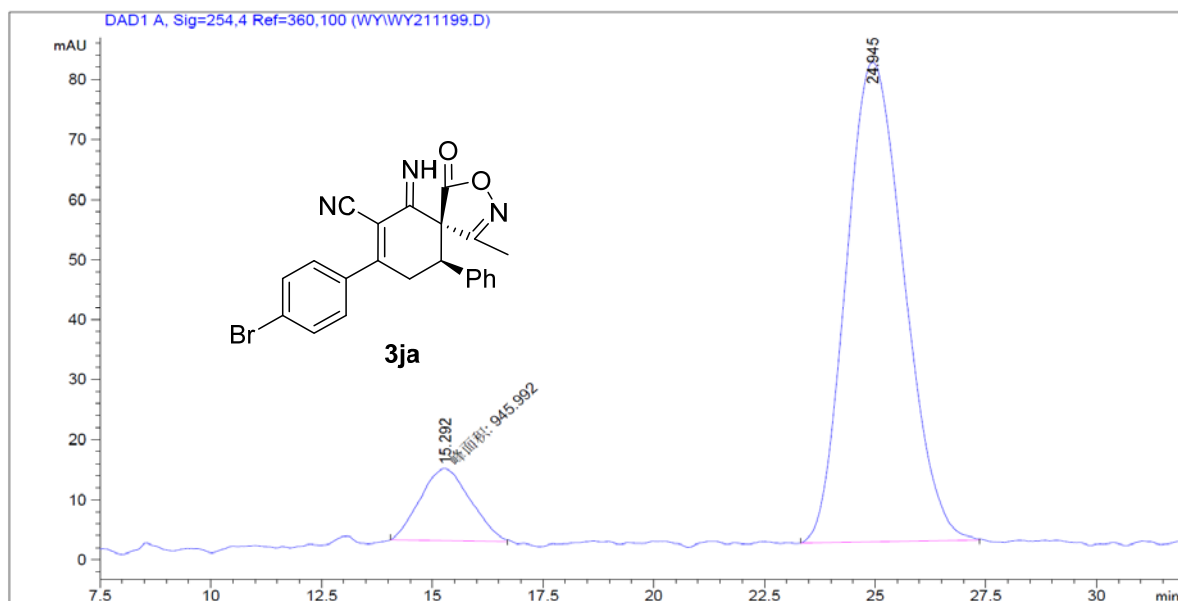

| Peak # | RetTime [min] | Type | Width [min] | Area [mAU*s] | Height [mAU] | Area %  |
|--------|---------------|------|-------------|--------------|--------------|---------|
| 1      | 15.292        | MM   | 1.3147      | 945.99176    | 11.99271     | 11.5384 |
| 2      | 24.945        | BB   | 1.2056      | 7252.65576   | 79.85174     | 88.4616 |

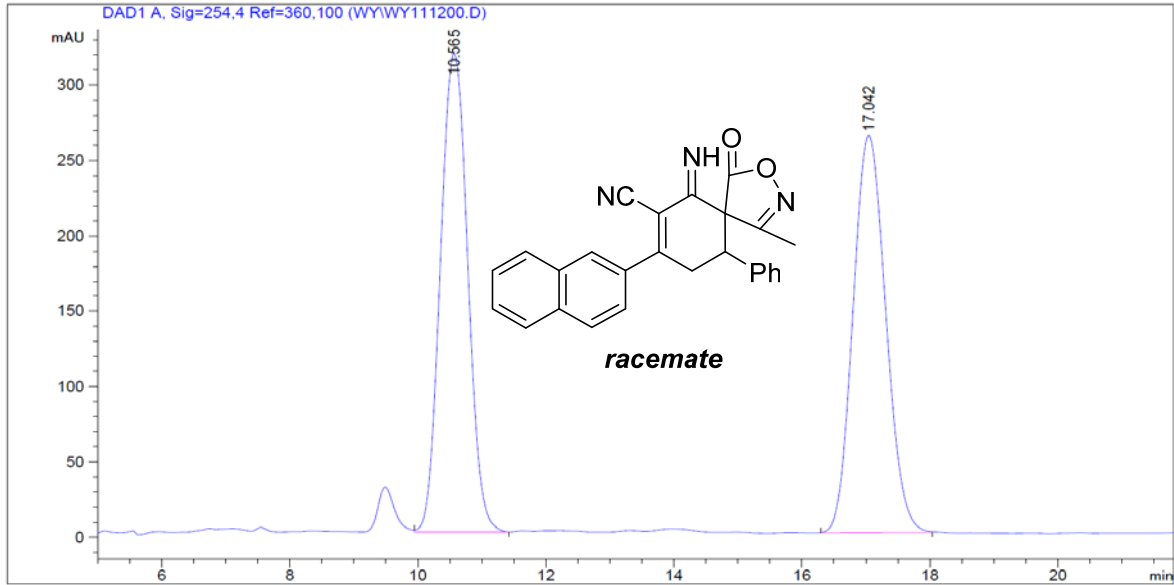

| Peak # | RetTime [min] | Type | Width [min] | Area [mAU*s] | Height [mAU] | Area %  |
|--------|---------------|------|-------------|--------------|--------------|---------|
| 1      | 10.565        | VB   | 0.4657      | 9404.36328   | 317.41415    | 50.1117 |
| 2      | 17.042        | BB   | 0.5602      | 9362.45508   | 263.68091    | 49.8883 |

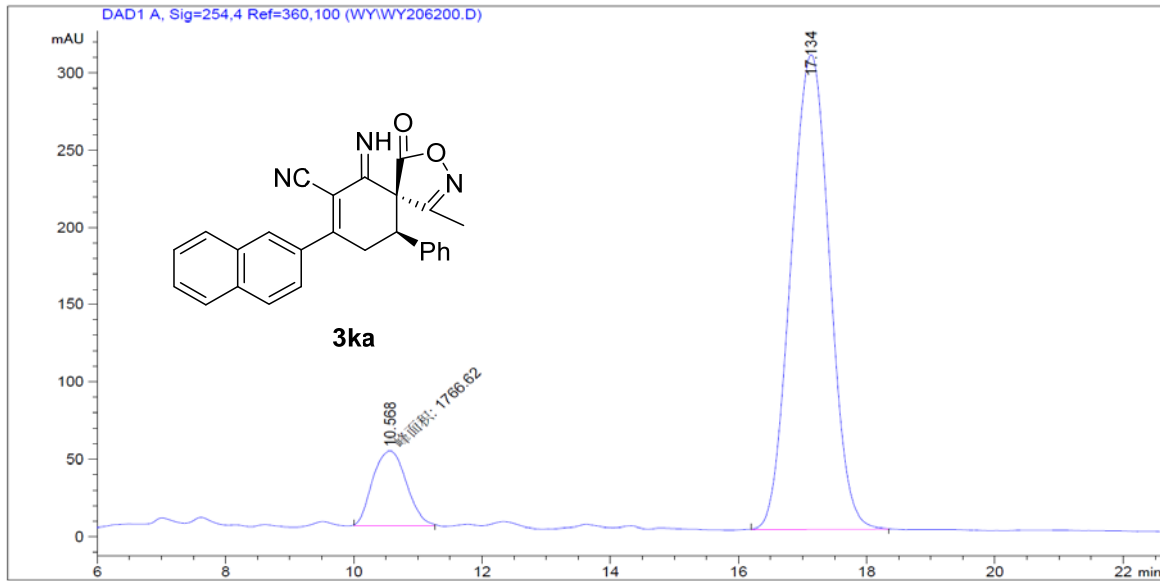

| Peak # | RetTime [min] | Type | Width [min] | Area [mAU*s] | Height [mAU] | Area %  |
|--------|---------------|------|-------------|--------------|--------------|---------|
| 1      | 10.568        | MM   | 0.6090      | 1766.62292   | 48.34830     | 12.1084 |
| 2      | 17.134        | BB   | 0.6671      | 1.28234e4    | 307.13055    | 87.8916 |

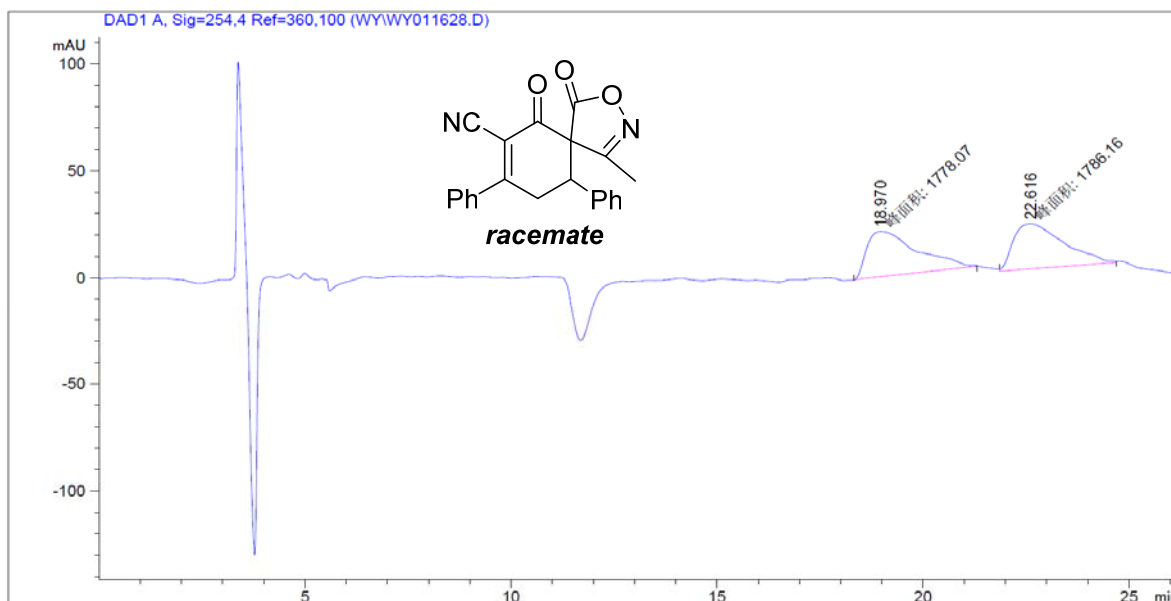

| Peak # | RetTime [min] | Type | Width [min] | Area [mAU*s] | Height [mAU] | Area %  |
|--------|---------------|------|-------------|--------------|--------------|---------|
| 1      | 18.970        | MM   | 1.4019      | 1778.06836   | 21.13936     | 49.8865 |
| 2      | 22.616        | MM   | 1.4093      | 1786.15564   | 21.12369     | 50.1135 |

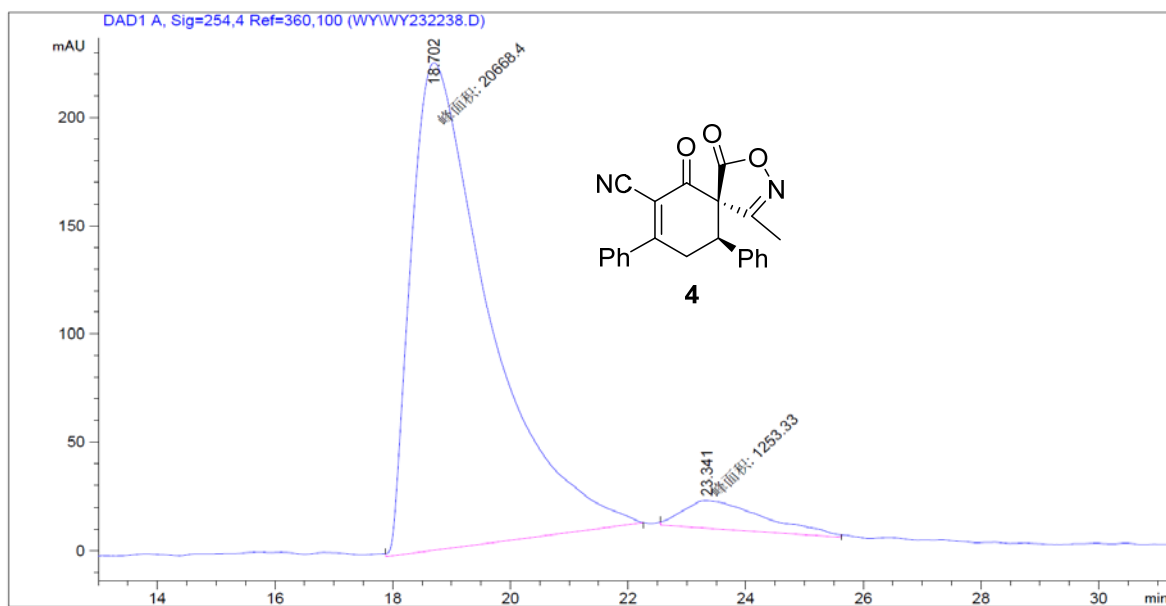

| Peak # | RetTime [min] | Type | Width [min] | Area [mAU*s] | Height [mAU] | Area %  |
|--------|---------------|------|-------------|--------------|--------------|---------|
| 1      | 18.702        | MM   | 1.5309      | 2.06684e4    | 225.01427    | 94.2827 |
| 2      | 23.341        | MM   | 1.6473      | 1253.33350   | 12.68086     | 5.7173  |
